# Supplementary material for: Long-term open-label vebicorvir for chronic HBV infection: Safety and off-treatment responses
Source: PubMed Central journal article supplement — JHEP Rep. 2024 Jan 18;6(4):100999. doi: 10.1016/j.jhepr.2023.100999 (PMC10951643; doi:10.1016/j.jhepr.2023.100999), 2024-01-18
Supplement: mmc3.pdf [file mmc3.pdf]

## ICMJE DISCLOSURE FORM

**Date:** 8/7/2023

**Your Name:** Man-Fung Yuen

**Manuscript Title:** Safety and off-treatment response of patients with chronic hepatitis B virus infection receiving long-term open-label vebicorvir

**Manuscript Number (if known):** [Click or tap here to enter text.](#)

In the interest of transparency, we ask you to disclose all relationships/activities/interests listed below that are related to the content of your manuscript. "Related" means any relation with for-profit or not-for-profit third parties whose interests may be affected by the content of the manuscript. Disclosure represents a commitment to transparency and does not necessarily indicate a bias. If you are in doubt about whether to list a relationship/activity/interest, it is preferable that you do so.

In the interest of transparency, we ask you to disclose all relationships/activities/interests listed below that are related to the content of your manuscript. "Related" means any relation with for-profit or not-for-profit third parties whose interests may be affected by the content of the manuscript. Disclosure represents a commitment to transparency and does not necessarily indicate a bias. If you are in doubt about whether to list a relationship/activity/interest, it is preferable that you do so.

The author's relationships/activities/interests should be defined broadly. For example, if your manuscript pertains to the epidemiology of hypertension, you should declare all relationships with manufacturers of antihypertensive medication, even if that medication is not mentioned in the manuscript.

In item #1 below, report all support for the work reported in this manuscript without time limit. For all other items, the time frame for disclosure is the past 36 months.

|                                                    | Name all entities with whom you have this relationship or indicate none (add rows as needed)                                                                                   | Specifications/Comments (e.g., if payments were made to you or to your institution)                                                                                                                                                                                                                                                                                                                                                                                                                                                                                               |        |                        |                           |                      |                         |                        |                 |            |       |                    |  |
|----------------------------------------------------|--------------------------------------------------------------------------------------------------------------------------------------------------------------------------------|-----------------------------------------------------------------------------------------------------------------------------------------------------------------------------------------------------------------------------------------------------------------------------------------------------------------------------------------------------------------------------------------------------------------------------------------------------------------------------------------------------------------------------------------------------------------------------------|--------|------------------------|---------------------------|----------------------|-------------------------|------------------------|-----------------|------------|-------|--------------------|--|
| Time frame: Since the initial planning of the work |                                                                                                                                                                                |                                                                                                                                                                                                                                                                                                                                                                                                                                                                                                                                                                                   |        |                        |                           |                      |                         |                        |                 |            |       |                    |  |
| <b>1</b>                                           | All support for the present manuscript (e.g., funding, provision of study materials, medical writing, article processing charges, etc.)<br><b>No time limit for this item.</b> | <input checked="" type="checkbox"/> <b>None</b><br><table border="1" style="width: 100%; border-collapse: collapse; margin-top: 5px;"> <tr><td style="height: 15px;"> </td><td style="width: 20px;"> </td></tr> <tr><td style="height: 15px;"> </td><td style="width: 20px;"> </td></tr> <tr><td style="height: 15px;"> </td><td style="width: 20px;"> </td></tr> </table> <p style="font-size: small; color: gray; margin-top: 5px;">Click the tab key to add additional rows.</p>                                                                                               |        |                        |                           |                      |                         |                        |                 |            |       |                    |  |
|                                                    |                                                                                                                                                                                |                                                                                                                                                                                                                                                                                                                                                                                                                                                                                                                                                                                   |        |                        |                           |                      |                         |                        |                 |            |       |                    |  |
|                                                    |                                                                                                                                                                                |                                                                                                                                                                                                                                                                                                                                                                                                                                                                                                                                                                                   |        |                        |                           |                      |                         |                        |                 |            |       |                    |  |
|                                                    |                                                                                                                                                                                |                                                                                                                                                                                                                                                                                                                                                                                                                                                                                                                                                                                   |        |                        |                           |                      |                         |                        |                 |            |       |                    |  |
| Time frame: past 36 months                         |                                                                                                                                                                                |                                                                                                                                                                                                                                                                                                                                                                                                                                                                                                                                                                                   |        |                        |                           |                      |                         |                        |                 |            |       |                    |  |
| <b>2</b>                                           | Grants or contracts from any entity (if not indicated in item #1 above).                                                                                                       | <input type="checkbox"/> <b>None</b><br><table border="1" style="width: 100%; border-collapse: collapse; margin-top: 5px;"> <tr> <td style="width: 60%;">AbbVie</td> <td rowspan="3" style="width: 40%;">Grant/research support</td> </tr> <tr> <td>Arrowhead Pharmaceuticals</td> </tr> <tr> <td>Assembly Biosciences</td> </tr> <tr> <td>Fujirebio Incorporation</td> <td rowspan="4">Grant/research support</td> </tr> <tr> <td>Gilead Sciences</td> </tr> <tr> <td>Immunocore</td> </tr> <tr> <td>Roche</td> </tr> <tr> <td>Sysmex Corporation</td> <td> </td> </tr> </table> | AbbVie | Grant/research support | Arrowhead Pharmaceuticals | Assembly Biosciences | Fujirebio Incorporation | Grant/research support | Gilead Sciences | Immunocore | Roche | Sysmex Corporation |  |
| AbbVie                                             | Grant/research support                                                                                                                                                         |                                                                                                                                                                                                                                                                                                                                                                                                                                                                                                                                                                                   |        |                        |                           |                      |                         |                        |                 |            |       |                    |  |
| Arrowhead Pharmaceuticals                          |                                                                                                                                                                                |                                                                                                                                                                                                                                                                                                                                                                                                                                                                                                                                                                                   |        |                        |                           |                      |                         |                        |                 |            |       |                    |  |
| Assembly Biosciences                               |                                                                                                                                                                                |                                                                                                                                                                                                                                                                                                                                                                                                                                                                                                                                                                                   |        |                        |                           |                      |                         |                        |                 |            |       |                    |  |
| Fujirebio Incorporation                            | Grant/research support                                                                                                                                                         |                                                                                                                                                                                                                                                                                                                                                                                                                                                                                                                                                                                   |        |                        |                           |                      |                         |                        |                 |            |       |                    |  |
| Gilead Sciences                                    |                                                                                                                                                                                |                                                                                                                                                                                                                                                                                                                                                                                                                                                                                                                                                                                   |        |                        |                           |                      |                         |                        |                 |            |       |                    |  |
| Immunocore                                         |                                                                                                                                                                                |                                                                                                                                                                                                                                                                                                                                                                                                                                                                                                                                                                                   |        |                        |                           |                      |                         |                        |                 |            |       |                    |  |
| Roche                                              |                                                                                                                                                                                |                                                                                                                                                                                                                                                                                                                                                                                                                                                                                                                                                                                   |        |                        |                           |                      |                         |                        |                 |            |       |                    |  |
| Sysmex Corporation                                 |                                                                                                                                                                                |                                                                                                                                                                                                                                                                                                                                                                                                                                                                                                                                                                                   |        |                        |                           |                      |                         |                        |                 |            |       |                    |  |

|          |                                                                                                              | Name all entities with whom you have this relationship or indicate none (add rows as needed) | Specifications/Comments (e.g., if payments were made to you or to your institution) |
|----------|--------------------------------------------------------------------------------------------------------------|----------------------------------------------------------------------------------------------|-------------------------------------------------------------------------------------|
|          |                                                                                                              |                                                                                              |                                                                                     |
| <b>3</b> | Royalties or licenses                                                                                        | <input checked="" type="checkbox"/> <b>None</b>                                              |                                                                                     |
|          |                                                                                                              |                                                                                              |                                                                                     |
| <b>4</b> | Consulting fees                                                                                              | <input type="checkbox"/> <b>None</b>                                                         |                                                                                     |
|          |                                                                                                              | AbbVie                                                                                       | Consultant                                                                          |
|          |                                                                                                              | AiCuris                                                                                      |                                                                                     |
|          |                                                                                                              | Aligos Therapeutics                                                                          |                                                                                     |
|          |                                                                                                              | Antios Therapeutics                                                                          |                                                                                     |
|          |                                                                                                              | Arbutus Biopharma                                                                            |                                                                                     |
|          |                                                                                                              | Arrowhead Pharmaceuticals                                                                    |                                                                                     |
|          |                                                                                                              | Assembly Biosciences                                                                         |                                                                                     |
|          |                                                                                                              | Clear B Therapeutics                                                                         |                                                                                     |
|          |                                                                                                              | Dicerna Pharmaceuticals                                                                      |                                                                                     |
|          |                                                                                                              | Finch Therapeutics                                                                           |                                                                                     |
|          |                                                                                                              | Fujirebio Incorporation                                                                      |                                                                                     |
|          |                                                                                                              | GlaxoSmithKline                                                                              |                                                                                     |
|          |                                                                                                              | Gilead Sciences                                                                              |                                                                                     |
|          |                                                                                                              | Immunocore                                                                                   |                                                                                     |
|          |                                                                                                              | Janssen                                                                                      |                                                                                     |
|          |                                                                                                              | Roche                                                                                        |                                                                                     |
|          |                                                                                                              | Sysmex Corporation                                                                           |                                                                                     |
|          |                                                                                                              | Tune Therapeutics                                                                            |                                                                                     |
|          |                                                                                                              | Vir Biotechnology                                                                            |                                                                                     |
|          |                                                                                                              | Visirna Therapeutics                                                                         |                                                                                     |
| <b>5</b> | Payment or honoraria for lectures, presentations, speakers bureaus, manuscript writing or educational events | <input checked="" type="checkbox"/> <b>None</b>                                              |                                                                                     |
|          |                                                                                                              |                                                                                              |                                                                                     |
| <b>6</b> | Payment for expert testimony                                                                                 | <input checked="" type="checkbox"/> <b>None</b>                                              |                                                                                     |
|          |                                                                                                              |                                                                                              |                                                                                     |

|                           |                                                                                                   | Name all entities with whom you have this relationship or indicate none (add rows as needed)                                                                                                                                                                                                                                                                                                                                                                                                                                                                                                                                                                                                                                                                                                                                                                                                                                                                                                                                                                                                                                                                                                  | Specifications/Comments (e.g., if payments were made to you or to your institution) |                |         |  |                     |  |                     |  |                   |  |                           |  |                      |  |                      |  |                         |  |                    |  |                         |  |                 |  |                 |  |            |  |         |  |       |  |                   |  |                   |  |                   |  |                      |  |  |  |  |  |  |  |  |
|---------------------------|---------------------------------------------------------------------------------------------------|-----------------------------------------------------------------------------------------------------------------------------------------------------------------------------------------------------------------------------------------------------------------------------------------------------------------------------------------------------------------------------------------------------------------------------------------------------------------------------------------------------------------------------------------------------------------------------------------------------------------------------------------------------------------------------------------------------------------------------------------------------------------------------------------------------------------------------------------------------------------------------------------------------------------------------------------------------------------------------------------------------------------------------------------------------------------------------------------------------------------------------------------------------------------------------------------------|-------------------------------------------------------------------------------------|----------------|---------|--|---------------------|--|---------------------|--|-------------------|--|---------------------------|--|----------------------|--|----------------------|--|-------------------------|--|--------------------|--|-------------------------|--|-----------------|--|-----------------|--|------------|--|---------|--|-------|--|-------------------|--|-------------------|--|-------------------|--|----------------------|--|--|--|--|--|--|--|--|
| 7                         | Support for attending meetings and/or travel                                                      | <input checked="" type="checkbox"/> <b>None</b><br><table border="1" style="width: 100%; border-collapse: collapse;"> <tr><td style="width: 50%; height: 20px;"></td><td style="width: 50%;"></td></tr> <tr><td style="height: 20px;"></td><td></td></tr> <tr><td style="height: 20px;"></td><td></td></tr> </table>                                                                                                                                                                                                                                                                                                                                                                                                                                                                                                                                                                                                                                                                                                                                                                                                                                                                          |                                                                                     |                |         |  |                     |  |                     |  |                   |  |                           |  |                      |  |                      |  |                         |  |                    |  |                         |  |                 |  |                 |  |            |  |         |  |       |  |                   |  |                   |  |                   |  |                      |  |  |  |  |  |  |  |  |
|                           |                                                                                                   |                                                                                                                                                                                                                                                                                                                                                                                                                                                                                                                                                                                                                                                                                                                                                                                                                                                                                                                                                                                                                                                                                                                                                                                               |                                                                                     |                |         |  |                     |  |                     |  |                   |  |                           |  |                      |  |                      |  |                         |  |                    |  |                         |  |                 |  |                 |  |            |  |         |  |       |  |                   |  |                   |  |                   |  |                      |  |  |  |  |  |  |  |  |
|                           |                                                                                                   |                                                                                                                                                                                                                                                                                                                                                                                                                                                                                                                                                                                                                                                                                                                                                                                                                                                                                                                                                                                                                                                                                                                                                                                               |                                                                                     |                |         |  |                     |  |                     |  |                   |  |                           |  |                      |  |                      |  |                         |  |                    |  |                         |  |                 |  |                 |  |            |  |         |  |       |  |                   |  |                   |  |                   |  |                      |  |  |  |  |  |  |  |  |
|                           |                                                                                                   |                                                                                                                                                                                                                                                                                                                                                                                                                                                                                                                                                                                                                                                                                                                                                                                                                                                                                                                                                                                                                                                                                                                                                                                               |                                                                                     |                |         |  |                     |  |                     |  |                   |  |                           |  |                      |  |                      |  |                         |  |                    |  |                         |  |                 |  |                 |  |            |  |         |  |       |  |                   |  |                   |  |                   |  |                      |  |  |  |  |  |  |  |  |
| 8                         | Patents planned, issued or pending                                                                | <input checked="" type="checkbox"/> <b>None</b><br><table border="1" style="width: 100%; border-collapse: collapse;"> <tr><td style="width: 50%; height: 20px;"></td><td style="width: 50%;"></td></tr> <tr><td style="height: 20px;"></td><td></td></tr> <tr><td style="height: 20px;"></td><td></td></tr> </table>                                                                                                                                                                                                                                                                                                                                                                                                                                                                                                                                                                                                                                                                                                                                                                                                                                                                          |                                                                                     |                |         |  |                     |  |                     |  |                   |  |                           |  |                      |  |                      |  |                         |  |                    |  |                         |  |                 |  |                 |  |            |  |         |  |       |  |                   |  |                   |  |                   |  |                      |  |  |  |  |  |  |  |  |
|                           |                                                                                                   |                                                                                                                                                                                                                                                                                                                                                                                                                                                                                                                                                                                                                                                                                                                                                                                                                                                                                                                                                                                                                                                                                                                                                                                               |                                                                                     |                |         |  |                     |  |                     |  |                   |  |                           |  |                      |  |                      |  |                         |  |                    |  |                         |  |                 |  |                 |  |            |  |         |  |       |  |                   |  |                   |  |                   |  |                      |  |  |  |  |  |  |  |  |
|                           |                                                                                                   |                                                                                                                                                                                                                                                                                                                                                                                                                                                                                                                                                                                                                                                                                                                                                                                                                                                                                                                                                                                                                                                                                                                                                                                               |                                                                                     |                |         |  |                     |  |                     |  |                   |  |                           |  |                      |  |                      |  |                         |  |                    |  |                         |  |                 |  |                 |  |            |  |         |  |       |  |                   |  |                   |  |                   |  |                      |  |  |  |  |  |  |  |  |
|                           |                                                                                                   |                                                                                                                                                                                                                                                                                                                                                                                                                                                                                                                                                                                                                                                                                                                                                                                                                                                                                                                                                                                                                                                                                                                                                                                               |                                                                                     |                |         |  |                     |  |                     |  |                   |  |                           |  |                      |  |                      |  |                         |  |                    |  |                         |  |                 |  |                 |  |            |  |         |  |       |  |                   |  |                   |  |                   |  |                      |  |  |  |  |  |  |  |  |
| 9                         | Participation on a Data Safety Monitoring Board or Advisory Board                                 | <input type="checkbox"/> <b>None</b><br><table border="1" style="width: 100%; border-collapse: collapse;"> <tr> <td style="width: 50%;"><b>AbbVie</b></td> <td style="width: 50%;"><b>Advisor</b></td> </tr> <tr><td>AiCuris</td><td></td></tr> <tr><td>Aligos Therapeutics</td><td></td></tr> <tr><td>Antios Therapeutics</td><td></td></tr> <tr><td>Arbutus Biopharma</td><td></td></tr> <tr><td>Arrowhead Pharmaceuticals</td><td></td></tr> <tr><td>Assembly Biosciences</td><td></td></tr> <tr><td>Clear B Therapeutics</td><td></td></tr> <tr><td>Dicerna Pharmaceuticals</td><td></td></tr> <tr><td>Finch Therapeutics</td><td></td></tr> <tr><td>Fujirebio Incorporation</td><td></td></tr> <tr><td>GlaxoSmithKline</td><td></td></tr> <tr><td>Gilead Sciences</td><td></td></tr> <tr><td>Immunocore</td><td></td></tr> <tr><td>Janssen</td><td></td></tr> <tr><td>Roche</td><td></td></tr> <tr><td>Symex Corporation</td><td></td></tr> <tr><td>Tune Therapeutics</td><td></td></tr> <tr><td>Vir Biotechnology</td><td></td></tr> <tr><td>Visirna Therapeutics</td><td></td></tr> <tr><td> </td><td> </td></tr> <tr><td> </td><td> </td></tr> <tr><td> </td><td> </td></tr> </table> | <b>AbbVie</b>                                                                       | <b>Advisor</b> | AiCuris |  | Aligos Therapeutics |  | Antios Therapeutics |  | Arbutus Biopharma |  | Arrowhead Pharmaceuticals |  | Assembly Biosciences |  | Clear B Therapeutics |  | Dicerna Pharmaceuticals |  | Finch Therapeutics |  | Fujirebio Incorporation |  | GlaxoSmithKline |  | Gilead Sciences |  | Immunocore |  | Janssen |  | Roche |  | Symex Corporation |  | Tune Therapeutics |  | Vir Biotechnology |  | Visirna Therapeutics |  |  |  |  |  |  |  |  |
| <b>AbbVie</b>             | <b>Advisor</b>                                                                                    |                                                                                                                                                                                                                                                                                                                                                                                                                                                                                                                                                                                                                                                                                                                                                                                                                                                                                                                                                                                                                                                                                                                                                                                               |                                                                                     |                |         |  |                     |  |                     |  |                   |  |                           |  |                      |  |                      |  |                         |  |                    |  |                         |  |                 |  |                 |  |            |  |         |  |       |  |                   |  |                   |  |                   |  |                      |  |  |  |  |  |  |  |  |
| AiCuris                   |                                                                                                   |                                                                                                                                                                                                                                                                                                                                                                                                                                                                                                                                                                                                                                                                                                                                                                                                                                                                                                                                                                                                                                                                                                                                                                                               |                                                                                     |                |         |  |                     |  |                     |  |                   |  |                           |  |                      |  |                      |  |                         |  |                    |  |                         |  |                 |  |                 |  |            |  |         |  |       |  |                   |  |                   |  |                   |  |                      |  |  |  |  |  |  |  |  |
| Aligos Therapeutics       |                                                                                                   |                                                                                                                                                                                                                                                                                                                                                                                                                                                                                                                                                                                                                                                                                                                                                                                                                                                                                                                                                                                                                                                                                                                                                                                               |                                                                                     |                |         |  |                     |  |                     |  |                   |  |                           |  |                      |  |                      |  |                         |  |                    |  |                         |  |                 |  |                 |  |            |  |         |  |       |  |                   |  |                   |  |                   |  |                      |  |  |  |  |  |  |  |  |
| Antios Therapeutics       |                                                                                                   |                                                                                                                                                                                                                                                                                                                                                                                                                                                                                                                                                                                                                                                                                                                                                                                                                                                                                                                                                                                                                                                                                                                                                                                               |                                                                                     |                |         |  |                     |  |                     |  |                   |  |                           |  |                      |  |                      |  |                         |  |                    |  |                         |  |                 |  |                 |  |            |  |         |  |       |  |                   |  |                   |  |                   |  |                      |  |  |  |  |  |  |  |  |
| Arbutus Biopharma         |                                                                                                   |                                                                                                                                                                                                                                                                                                                                                                                                                                                                                                                                                                                                                                                                                                                                                                                                                                                                                                                                                                                                                                                                                                                                                                                               |                                                                                     |                |         |  |                     |  |                     |  |                   |  |                           |  |                      |  |                      |  |                         |  |                    |  |                         |  |                 |  |                 |  |            |  |         |  |       |  |                   |  |                   |  |                   |  |                      |  |  |  |  |  |  |  |  |
| Arrowhead Pharmaceuticals |                                                                                                   |                                                                                                                                                                                                                                                                                                                                                                                                                                                                                                                                                                                                                                                                                                                                                                                                                                                                                                                                                                                                                                                                                                                                                                                               |                                                                                     |                |         |  |                     |  |                     |  |                   |  |                           |  |                      |  |                      |  |                         |  |                    |  |                         |  |                 |  |                 |  |            |  |         |  |       |  |                   |  |                   |  |                   |  |                      |  |  |  |  |  |  |  |  |
| Assembly Biosciences      |                                                                                                   |                                                                                                                                                                                                                                                                                                                                                                                                                                                                                                                                                                                                                                                                                                                                                                                                                                                                                                                                                                                                                                                                                                                                                                                               |                                                                                     |                |         |  |                     |  |                     |  |                   |  |                           |  |                      |  |                      |  |                         |  |                    |  |                         |  |                 |  |                 |  |            |  |         |  |       |  |                   |  |                   |  |                   |  |                      |  |  |  |  |  |  |  |  |
| Clear B Therapeutics      |                                                                                                   |                                                                                                                                                                                                                                                                                                                                                                                                                                                                                                                                                                                                                                                                                                                                                                                                                                                                                                                                                                                                                                                                                                                                                                                               |                                                                                     |                |         |  |                     |  |                     |  |                   |  |                           |  |                      |  |                      |  |                         |  |                    |  |                         |  |                 |  |                 |  |            |  |         |  |       |  |                   |  |                   |  |                   |  |                      |  |  |  |  |  |  |  |  |
| Dicerna Pharmaceuticals   |                                                                                                   |                                                                                                                                                                                                                                                                                                                                                                                                                                                                                                                                                                                                                                                                                                                                                                                                                                                                                                                                                                                                                                                                                                                                                                                               |                                                                                     |                |         |  |                     |  |                     |  |                   |  |                           |  |                      |  |                      |  |                         |  |                    |  |                         |  |                 |  |                 |  |            |  |         |  |       |  |                   |  |                   |  |                   |  |                      |  |  |  |  |  |  |  |  |
| Finch Therapeutics        |                                                                                                   |                                                                                                                                                                                                                                                                                                                                                                                                                                                                                                                                                                                                                                                                                                                                                                                                                                                                                                                                                                                                                                                                                                                                                                                               |                                                                                     |                |         |  |                     |  |                     |  |                   |  |                           |  |                      |  |                      |  |                         |  |                    |  |                         |  |                 |  |                 |  |            |  |         |  |       |  |                   |  |                   |  |                   |  |                      |  |  |  |  |  |  |  |  |
| Fujirebio Incorporation   |                                                                                                   |                                                                                                                                                                                                                                                                                                                                                                                                                                                                                                                                                                                                                                                                                                                                                                                                                                                                                                                                                                                                                                                                                                                                                                                               |                                                                                     |                |         |  |                     |  |                     |  |                   |  |                           |  |                      |  |                      |  |                         |  |                    |  |                         |  |                 |  |                 |  |            |  |         |  |       |  |                   |  |                   |  |                   |  |                      |  |  |  |  |  |  |  |  |
| GlaxoSmithKline           |                                                                                                   |                                                                                                                                                                                                                                                                                                                                                                                                                                                                                                                                                                                                                                                                                                                                                                                                                                                                                                                                                                                                                                                                                                                                                                                               |                                                                                     |                |         |  |                     |  |                     |  |                   |  |                           |  |                      |  |                      |  |                         |  |                    |  |                         |  |                 |  |                 |  |            |  |         |  |       |  |                   |  |                   |  |                   |  |                      |  |  |  |  |  |  |  |  |
| Gilead Sciences           |                                                                                                   |                                                                                                                                                                                                                                                                                                                                                                                                                                                                                                                                                                                                                                                                                                                                                                                                                                                                                                                                                                                                                                                                                                                                                                                               |                                                                                     |                |         |  |                     |  |                     |  |                   |  |                           |  |                      |  |                      |  |                         |  |                    |  |                         |  |                 |  |                 |  |            |  |         |  |       |  |                   |  |                   |  |                   |  |                      |  |  |  |  |  |  |  |  |
| Immunocore                |                                                                                                   |                                                                                                                                                                                                                                                                                                                                                                                                                                                                                                                                                                                                                                                                                                                                                                                                                                                                                                                                                                                                                                                                                                                                                                                               |                                                                                     |                |         |  |                     |  |                     |  |                   |  |                           |  |                      |  |                      |  |                         |  |                    |  |                         |  |                 |  |                 |  |            |  |         |  |       |  |                   |  |                   |  |                   |  |                      |  |  |  |  |  |  |  |  |
| Janssen                   |                                                                                                   |                                                                                                                                                                                                                                                                                                                                                                                                                                                                                                                                                                                                                                                                                                                                                                                                                                                                                                                                                                                                                                                                                                                                                                                               |                                                                                     |                |         |  |                     |  |                     |  |                   |  |                           |  |                      |  |                      |  |                         |  |                    |  |                         |  |                 |  |                 |  |            |  |         |  |       |  |                   |  |                   |  |                   |  |                      |  |  |  |  |  |  |  |  |
| Roche                     |                                                                                                   |                                                                                                                                                                                                                                                                                                                                                                                                                                                                                                                                                                                                                                                                                                                                                                                                                                                                                                                                                                                                                                                                                                                                                                                               |                                                                                     |                |         |  |                     |  |                     |  |                   |  |                           |  |                      |  |                      |  |                         |  |                    |  |                         |  |                 |  |                 |  |            |  |         |  |       |  |                   |  |                   |  |                   |  |                      |  |  |  |  |  |  |  |  |
| Symex Corporation         |                                                                                                   |                                                                                                                                                                                                                                                                                                                                                                                                                                                                                                                                                                                                                                                                                                                                                                                                                                                                                                                                                                                                                                                                                                                                                                                               |                                                                                     |                |         |  |                     |  |                     |  |                   |  |                           |  |                      |  |                      |  |                         |  |                    |  |                         |  |                 |  |                 |  |            |  |         |  |       |  |                   |  |                   |  |                   |  |                      |  |  |  |  |  |  |  |  |
| Tune Therapeutics         |                                                                                                   |                                                                                                                                                                                                                                                                                                                                                                                                                                                                                                                                                                                                                                                                                                                                                                                                                                                                                                                                                                                                                                                                                                                                                                                               |                                                                                     |                |         |  |                     |  |                     |  |                   |  |                           |  |                      |  |                      |  |                         |  |                    |  |                         |  |                 |  |                 |  |            |  |         |  |       |  |                   |  |                   |  |                   |  |                      |  |  |  |  |  |  |  |  |
| Vir Biotechnology         |                                                                                                   |                                                                                                                                                                                                                                                                                                                                                                                                                                                                                                                                                                                                                                                                                                                                                                                                                                                                                                                                                                                                                                                                                                                                                                                               |                                                                                     |                |         |  |                     |  |                     |  |                   |  |                           |  |                      |  |                      |  |                         |  |                    |  |                         |  |                 |  |                 |  |            |  |         |  |       |  |                   |  |                   |  |                   |  |                      |  |  |  |  |  |  |  |  |
| Visirna Therapeutics      |                                                                                                   |                                                                                                                                                                                                                                                                                                                                                                                                                                                                                                                                                                                                                                                                                                                                                                                                                                                                                                                                                                                                                                                                                                                                                                                               |                                                                                     |                |         |  |                     |  |                     |  |                   |  |                           |  |                      |  |                      |  |                         |  |                    |  |                         |  |                 |  |                 |  |            |  |         |  |       |  |                   |  |                   |  |                   |  |                      |  |  |  |  |  |  |  |  |
|                           |                                                                                                   |                                                                                                                                                                                                                                                                                                                                                                                                                                                                                                                                                                                                                                                                                                                                                                                                                                                                                                                                                                                                                                                                                                                                                                                               |                                                                                     |                |         |  |                     |  |                     |  |                   |  |                           |  |                      |  |                      |  |                         |  |                    |  |                         |  |                 |  |                 |  |            |  |         |  |       |  |                   |  |                   |  |                   |  |                      |  |  |  |  |  |  |  |  |
|                           |                                                                                                   |                                                                                                                                                                                                                                                                                                                                                                                                                                                                                                                                                                                                                                                                                                                                                                                                                                                                                                                                                                                                                                                                                                                                                                                               |                                                                                     |                |         |  |                     |  |                     |  |                   |  |                           |  |                      |  |                      |  |                         |  |                    |  |                         |  |                 |  |                 |  |            |  |         |  |       |  |                   |  |                   |  |                   |  |                      |  |  |  |  |  |  |  |  |
|                           |                                                                                                   |                                                                                                                                                                                                                                                                                                                                                                                                                                                                                                                                                                                                                                                                                                                                                                                                                                                                                                                                                                                                                                                                                                                                                                                               |                                                                                     |                |         |  |                     |  |                     |  |                   |  |                           |  |                      |  |                      |  |                         |  |                    |  |                         |  |                 |  |                 |  |            |  |         |  |       |  |                   |  |                   |  |                   |  |                      |  |  |  |  |  |  |  |  |
| 10                        | Leadership or fiduciary role in other board, society, committee or advocacy group, paid or unpaid | <input checked="" type="checkbox"/> <b>None</b><br><table border="1" style="width: 100%; border-collapse: collapse;"> <tr><td style="width: 50%; height: 20px;"></td><td style="width: 50%;"></td></tr> <tr><td style="height: 20px;"></td><td></td></tr> <tr><td style="height: 20px;"></td><td></td></tr> </table>                                                                                                                                                                                                                                                                                                                                                                                                                                                                                                                                                                                                                                                                                                                                                                                                                                                                          |                                                                                     |                |         |  |                     |  |                     |  |                   |  |                           |  |                      |  |                      |  |                         |  |                    |  |                         |  |                 |  |                 |  |            |  |         |  |       |  |                   |  |                   |  |                   |  |                      |  |  |  |  |  |  |  |  |
|                           |                                                                                                   |                                                                                                                                                                                                                                                                                                                                                                                                                                                                                                                                                                                                                                                                                                                                                                                                                                                                                                                                                                                                                                                                                                                                                                                               |                                                                                     |                |         |  |                     |  |                     |  |                   |  |                           |  |                      |  |                      |  |                         |  |                    |  |                         |  |                 |  |                 |  |            |  |         |  |       |  |                   |  |                   |  |                   |  |                      |  |  |  |  |  |  |  |  |
|                           |                                                                                                   |                                                                                                                                                                                                                                                                                                                                                                                                                                                                                                                                                                                                                                                                                                                                                                                                                                                                                                                                                                                                                                                                                                                                                                                               |                                                                                     |                |         |  |                     |  |                     |  |                   |  |                           |  |                      |  |                      |  |                         |  |                    |  |                         |  |                 |  |                 |  |            |  |         |  |       |  |                   |  |                   |  |                   |  |                      |  |  |  |  |  |  |  |  |
|                           |                                                                                                   |                                                                                                                                                                                                                                                                                                                                                                                                                                                                                                                                                                                                                                                                                                                                                                                                                                                                                                                                                                                                                                                                                                                                                                                               |                                                                                     |                |         |  |                     |  |                     |  |                   |  |                           |  |                      |  |                      |  |                         |  |                    |  |                         |  |                 |  |                 |  |            |  |         |  |       |  |                   |  |                   |  |                   |  |                      |  |  |  |  |  |  |  |  |
| 11                        | Stock or stock options                                                                            | <input checked="" type="checkbox"/> <b>None</b><br><table border="1" style="width: 100%; border-collapse: collapse;"> <tr><td style="width: 50%; height: 20px;"></td><td style="width: 50%;"></td></tr> <tr><td style="height: 20px;"></td><td></td></tr> <tr><td style="height: 20px;"></td><td></td></tr> </table>                                                                                                                                                                                                                                                                                                                                                                                                                                                                                                                                                                                                                                                                                                                                                                                                                                                                          |                                                                                     |                |         |  |                     |  |                     |  |                   |  |                           |  |                      |  |                      |  |                         |  |                    |  |                         |  |                 |  |                 |  |            |  |         |  |       |  |                   |  |                   |  |                   |  |                      |  |  |  |  |  |  |  |  |
|                           |                                                                                                   |                                                                                                                                                                                                                                                                                                                                                                                                                                                                                                                                                                                                                                                                                                                                                                                                                                                                                                                                                                                                                                                                                                                                                                                               |                                                                                     |                |         |  |                     |  |                     |  |                   |  |                           |  |                      |  |                      |  |                         |  |                    |  |                         |  |                 |  |                 |  |            |  |         |  |       |  |                   |  |                   |  |                   |  |                      |  |  |  |  |  |  |  |  |
|                           |                                                                                                   |                                                                                                                                                                                                                                                                                                                                                                                                                                                                                                                                                                                                                                                                                                                                                                                                                                                                                                                                                                                                                                                                                                                                                                                               |                                                                                     |                |         |  |                     |  |                     |  |                   |  |                           |  |                      |  |                      |  |                         |  |                    |  |                         |  |                 |  |                 |  |            |  |         |  |       |  |                   |  |                   |  |                   |  |                      |  |  |  |  |  |  |  |  |
|                           |                                                                                                   |                                                                                                                                                                                                                                                                                                                                                                                                                                                                                                                                                                                                                                                                                                                                                                                                                                                                                                                                                                                                                                                                                                                                                                                               |                                                                                     |                |         |  |                     |  |                     |  |                   |  |                           |  |                      |  |                      |  |                         |  |                    |  |                         |  |                 |  |                 |  |            |  |         |  |       |  |                   |  |                   |  |                   |  |                      |  |  |  |  |  |  |  |  |

|    |                                                                                  | Name all entities with whom you have this relationship or indicate none (add rows as needed) | Specifications/Comments (e.g., if payments were made to you or to your institution) |
|----|----------------------------------------------------------------------------------|----------------------------------------------------------------------------------------------|-------------------------------------------------------------------------------------|
| 12 | Receipt of equipment, materials, drugs, medical writing, gifts or other services | <input checked="" type="checkbox"/> None                                                     |                                                                                     |
|    |                                                                                  |                                                                                              |                                                                                     |
|    |                                                                                  |                                                                                              |                                                                                     |
|    |                                                                                  |                                                                                              |                                                                                     |
| 13 | Other financial or non-financial interests                                       | <input checked="" type="checkbox"/> None                                                     |                                                                                     |
|    |                                                                                  |                                                                                              |                                                                                     |
|    |                                                                                  |                                                                                              |                                                                                     |
|    |                                                                                  |                                                                                              |                                                                                     |
|    |                                                                                  |                                                                                              |                                                                                     |
|    |                                                                                  |                                                                                              |                                                                                     |
|    |                                                                                  |                                                                                              |                                                                                     |
|    |                                                                                  |                                                                                              |                                                                                     |
|    |                                                                                  |                                                                                              |                                                                                     |
|    |                                                                                  |                                                                                              |                                                                                     |
|    |                                                                                  |                                                                                              |                                                                                     |
|    |                                                                                  |                                                                                              |                                                                                     |
|    |                                                                                  |                                                                                              |                                                                                     |
|    |                                                                                  |                                                                                              |                                                                                     |
|    |                                                                                  |                                                                                              |                                                                                     |
|    |                                                                                  |                                                                                              |                                                                                     |
|    |                                                                                  |                                                                                              |                                                                                     |

Please place an "X" next to the following statement to indicate your agreement:

I certify that I have answered every question and have not altered the wording of any of the questions on this form.

## ICMJE DISCLOSURE FORM

**Date:** 8/7/2023

**Your Name:** Scott Fung

**Manuscript Title:** Safety and off-treatment response of patients with chronic hepatitis B virus infection receiving long-term open-label vebicorvir

**Manuscript Number (if known):** [Click or tap here to enter text.](#)

In the interest of transparency, we ask you to disclose all relationships/activities/interests listed below that are related to the content of your manuscript. "Related" means any relation with for-profit or not-for-profit third parties whose interests may be affected by the content of the manuscript. Disclosure represents a commitment to transparency and does not necessarily indicate a bias. If you are in doubt about whether to list a relationship/activity/interest, it is preferable that you do so.

In the interest of transparency, we ask you to disclose all relationships/activities/interests listed below that are related to the content of your manuscript. "Related" means any relation with for-profit or not-for-profit third parties whose interests may be affected by the content of the manuscript. Disclosure represents a commitment to transparency and does not necessarily indicate a bias. If you are in doubt about whether to list a relationship/activity/interest, it is preferable that you do so.

The author's relationships/activities/interests should be defined broadly. For example, if your manuscript pertains to the epidemiology of hypertension, you should declare all relationships with manufacturers of antihypertensive medication, even if that medication is not mentioned in the manuscript.

In item #1 below, report all support for the work reported in this manuscript without time limit. For all other items, the time frame for disclosure is the past 36 months.

|                                                           |                                                                                                                                                                                | Name all entities with whom you have this relationship or indicate none (add rows as needed)                                                                                                                                                                   | Specifications/Comments (e.g., if payments were made to you or to your institution) |  |  |  |  |  |                                                                                                                |
|-----------------------------------------------------------|--------------------------------------------------------------------------------------------------------------------------------------------------------------------------------|----------------------------------------------------------------------------------------------------------------------------------------------------------------------------------------------------------------------------------------------------------------|-------------------------------------------------------------------------------------|--|--|--|--|--|----------------------------------------------------------------------------------------------------------------|
| <b>Time frame: Since the initial planning of the work</b> |                                                                                                                                                                                |                                                                                                                                                                                                                                                                |                                                                                     |  |  |  |  |  |                                                                                                                |
| <b>1</b>                                                  | All support for the present manuscript (e.g., funding, provision of study materials, medical writing, article processing charges, etc.)<br><b>No time limit for this item.</b> | <input checked="" type="checkbox"/> <b>None</b><br><table border="1" style="width: 100%; height: 40px; margin-top: 5px;"> <tr><td style="width: 50%;"></td><td style="width: 50%;"></td></tr> <tr><td></td><td></td></tr> <tr><td></td><td></td></tr> </table> |                                                                                     |  |  |  |  |  | <div style="text-align: right; font-size: small; color: #ccc;">Click the tab key to add additional rows.</div> |
|                                                           |                                                                                                                                                                                |                                                                                                                                                                                                                                                                |                                                                                     |  |  |  |  |  |                                                                                                                |
|                                                           |                                                                                                                                                                                |                                                                                                                                                                                                                                                                |                                                                                     |  |  |  |  |  |                                                                                                                |
|                                                           |                                                                                                                                                                                |                                                                                                                                                                                                                                                                |                                                                                     |  |  |  |  |  |                                                                                                                |
| <b>Time frame: past 36 months</b>                         |                                                                                                                                                                                |                                                                                                                                                                                                                                                                |                                                                                     |  |  |  |  |  |                                                                                                                |
| <b>2</b>                                                  | Grants or contracts from any entity (if not indicated in item #1 above).                                                                                                       | <input checked="" type="checkbox"/> <b>None</b><br><table border="1" style="width: 100%; height: 40px; margin-top: 5px;"> <tr><td style="width: 50%;"></td><td style="width: 50%;"></td></tr> <tr><td></td><td></td></tr> <tr><td></td><td></td></tr> </table> |                                                                                     |  |  |  |  |  |                                                                                                                |
|                                                           |                                                                                                                                                                                |                                                                                                                                                                                                                                                                |                                                                                     |  |  |  |  |  |                                                                                                                |
|                                                           |                                                                                                                                                                                |                                                                                                                                                                                                                                                                |                                                                                     |  |  |  |  |  |                                                                                                                |
|                                                           |                                                                                                                                                                                |                                                                                                                                                                                                                                                                |                                                                                     |  |  |  |  |  |                                                                                                                |

|                      |                                                                                                              | Name all entities with whom you have this relationship or indicate none (add rows as needed)                                                                                                                                                                                                                                                                                                                                                                        | Specifications/Comments (e.g., if payments were made to you or to your institution) |                     |                      |                 |         |       |              |        |                   |  |
|----------------------|--------------------------------------------------------------------------------------------------------------|---------------------------------------------------------------------------------------------------------------------------------------------------------------------------------------------------------------------------------------------------------------------------------------------------------------------------------------------------------------------------------------------------------------------------------------------------------------------|-------------------------------------------------------------------------------------|---------------------|----------------------|-----------------|---------|-------|--------------|--------|-------------------|--|
| 3                    | Royalties or licenses                                                                                        | <input checked="" type="checkbox"/> <b>None</b><br><table border="1" style="width: 100%; border-collapse: collapse;"> <tr><td style="height: 20px;"> </td><td style="width: 150px;"> </td></tr> <tr><td style="height: 20px;"> </td><td> </td></tr> <tr><td style="height: 20px;"> </td><td> </td></tr> </table>                                                                                                                                                    |                                                                                     |                     |                      |                 |         |       |              |        |                   |  |
|                      |                                                                                                              |                                                                                                                                                                                                                                                                                                                                                                                                                                                                     |                                                                                     |                     |                      |                 |         |       |              |        |                   |  |
|                      |                                                                                                              |                                                                                                                                                                                                                                                                                                                                                                                                                                                                     |                                                                                     |                     |                      |                 |         |       |              |        |                   |  |
|                      |                                                                                                              |                                                                                                                                                                                                                                                                                                                                                                                                                                                                     |                                                                                     |                     |                      |                 |         |       |              |        |                   |  |
| 4                    | Consulting fees                                                                                              | <input checked="" type="checkbox"/> <b>None</b><br><table border="1" style="width: 100%; border-collapse: collapse;"> <tr><td style="height: 20px;"> </td><td style="width: 150px;"> </td></tr> <tr><td style="height: 20px;"> </td><td> </td></tr> <tr><td style="height: 20px;"> </td><td> </td></tr> </table>                                                                                                                                                    |                                                                                     |                     |                      |                 |         |       |              |        |                   |  |
|                      |                                                                                                              |                                                                                                                                                                                                                                                                                                                                                                                                                                                                     |                                                                                     |                     |                      |                 |         |       |              |        |                   |  |
|                      |                                                                                                              |                                                                                                                                                                                                                                                                                                                                                                                                                                                                     |                                                                                     |                     |                      |                 |         |       |              |        |                   |  |
|                      |                                                                                                              |                                                                                                                                                                                                                                                                                                                                                                                                                                                                     |                                                                                     |                     |                      |                 |         |       |              |        |                   |  |
| 5                    | Payment or honoraria for lectures, presentations, speakers bureaus, manuscript writing or educational events | <input type="checkbox"/> <b>None</b><br><table border="1" style="width: 100%; border-collapse: collapse;"> <tr> <td style="width: 60%;">AbbVie</td> <td rowspan="8" style="vertical-align: top;">speaking &amp; teaching</td> </tr> <tr><td>Assembly Biosciences</td></tr> <tr><td>Gilead Sciences</td></tr> <tr><td>Janssen</td></tr> <tr><td>Lupin</td></tr> <tr><td>Novo Nordisk</td></tr> <tr><td>Pfizer</td></tr> <tr><td>Springbank Pharma</td></tr> </table> | AbbVie                                                                              | speaking & teaching | Assembly Biosciences | Gilead Sciences | Janssen | Lupin | Novo Nordisk | Pfizer | Springbank Pharma |  |
| AbbVie               | speaking & teaching                                                                                          |                                                                                                                                                                                                                                                                                                                                                                                                                                                                     |                                                                                     |                     |                      |                 |         |       |              |        |                   |  |
| Assembly Biosciences |                                                                                                              |                                                                                                                                                                                                                                                                                                                                                                                                                                                                     |                                                                                     |                     |                      |                 |         |       |              |        |                   |  |
| Gilead Sciences      |                                                                                                              |                                                                                                                                                                                                                                                                                                                                                                                                                                                                     |                                                                                     |                     |                      |                 |         |       |              |        |                   |  |
| Janssen              |                                                                                                              |                                                                                                                                                                                                                                                                                                                                                                                                                                                                     |                                                                                     |                     |                      |                 |         |       |              |        |                   |  |
| Lupin                |                                                                                                              |                                                                                                                                                                                                                                                                                                                                                                                                                                                                     |                                                                                     |                     |                      |                 |         |       |              |        |                   |  |
| Novo Nordisk         |                                                                                                              |                                                                                                                                                                                                                                                                                                                                                                                                                                                                     |                                                                                     |                     |                      |                 |         |       |              |        |                   |  |
| Pfizer               |                                                                                                              |                                                                                                                                                                                                                                                                                                                                                                                                                                                                     |                                                                                     |                     |                      |                 |         |       |              |        |                   |  |
| Springbank Pharma    |                                                                                                              |                                                                                                                                                                                                                                                                                                                                                                                                                                                                     |                                                                                     |                     |                      |                 |         |       |              |        |                   |  |
| 6                    | Payment for expert testimony                                                                                 | <input checked="" type="checkbox"/> <b>None</b><br><table border="1" style="width: 100%; border-collapse: collapse;"> <tr><td style="height: 20px;"> </td><td style="width: 150px;"> </td></tr> <tr><td style="height: 20px;"> </td><td> </td></tr> <tr><td style="height: 20px;"> </td><td> </td></tr> </table>                                                                                                                                                    |                                                                                     |                     |                      |                 |         |       |              |        |                   |  |
|                      |                                                                                                              |                                                                                                                                                                                                                                                                                                                                                                                                                                                                     |                                                                                     |                     |                      |                 |         |       |              |        |                   |  |
|                      |                                                                                                              |                                                                                                                                                                                                                                                                                                                                                                                                                                                                     |                                                                                     |                     |                      |                 |         |       |              |        |                   |  |
|                      |                                                                                                              |                                                                                                                                                                                                                                                                                                                                                                                                                                                                     |                                                                                     |                     |                      |                 |         |       |              |        |                   |  |
| 7                    | Support for attending meetings and/or travel                                                                 | <input checked="" type="checkbox"/> <b>None</b><br><table border="1" style="width: 100%; border-collapse: collapse;"> <tr><td style="height: 20px;"> </td><td style="width: 150px;"> </td></tr> <tr><td style="height: 20px;"> </td><td> </td></tr> <tr><td style="height: 20px;"> </td><td> </td></tr> </table>                                                                                                                                                    |                                                                                     |                     |                      |                 |         |       |              |        |                   |  |
|                      |                                                                                                              |                                                                                                                                                                                                                                                                                                                                                                                                                                                                     |                                                                                     |                     |                      |                 |         |       |              |        |                   |  |
|                      |                                                                                                              |                                                                                                                                                                                                                                                                                                                                                                                                                                                                     |                                                                                     |                     |                      |                 |         |       |              |        |                   |  |
|                      |                                                                                                              |                                                                                                                                                                                                                                                                                                                                                                                                                                                                     |                                                                                     |                     |                      |                 |         |       |              |        |                   |  |
| 8                    | Patents planned, issued or pending                                                                           | <input checked="" type="checkbox"/> <b>None</b><br><table border="1" style="width: 100%; border-collapse: collapse;"> <tr><td style="height: 20px;"> </td><td style="width: 150px;"> </td></tr> <tr><td style="height: 20px;"> </td><td> </td></tr> <tr><td style="height: 20px;"> </td><td> </td></tr> </table>                                                                                                                                                    |                                                                                     |                     |                      |                 |         |       |              |        |                   |  |
|                      |                                                                                                              |                                                                                                                                                                                                                                                                                                                                                                                                                                                                     |                                                                                     |                     |                      |                 |         |       |              |        |                   |  |
|                      |                                                                                                              |                                                                                                                                                                                                                                                                                                                                                                                                                                                                     |                                                                                     |                     |                      |                 |         |       |              |        |                   |  |
|                      |                                                                                                              |                                                                                                                                                                                                                                                                                                                                                                                                                                                                     |                                                                                     |                     |                      |                 |         |       |              |        |                   |  |
| 9                    | Participation on a Data Safety Monitoring Board or Advisory Board                                            | <input type="checkbox"/> <b>None</b><br><table border="1" style="width: 100%; border-collapse: collapse;"> <tr> <td style="width: 60%;">AbbVie</td> <td rowspan="6" style="vertical-align: top;">Advisory committees</td> </tr> <tr><td>Assembly Biosciences</td></tr> <tr><td>Gilead Sciences</td></tr> <tr><td>Janssen</td></tr> <tr><td>Lupin</td></tr> <tr><td>Novo Nordisk</td></tr> </table>                                                                  | AbbVie                                                                              | Advisory committees | Assembly Biosciences | Gilead Sciences | Janssen | Lupin | Novo Nordisk |        |                   |  |
| AbbVie               | Advisory committees                                                                                          |                                                                                                                                                                                                                                                                                                                                                                                                                                                                     |                                                                                     |                     |                      |                 |         |       |              |        |                   |  |
| Assembly Biosciences |                                                                                                              |                                                                                                                                                                                                                                                                                                                                                                                                                                                                     |                                                                                     |                     |                      |                 |         |       |              |        |                   |  |
| Gilead Sciences      |                                                                                                              |                                                                                                                                                                                                                                                                                                                                                                                                                                                                     |                                                                                     |                     |                      |                 |         |       |              |        |                   |  |
| Janssen              |                                                                                                              |                                                                                                                                                                                                                                                                                                                                                                                                                                                                     |                                                                                     |                     |                      |                 |         |       |              |        |                   |  |
| Lupin                |                                                                                                              |                                                                                                                                                                                                                                                                                                                                                                                                                                                                     |                                                                                     |                     |                      |                 |         |       |              |        |                   |  |
| Novo Nordisk         |                                                                                                              |                                                                                                                                                                                                                                                                                                                                                                                                                                                                     |                                                                                     |                     |                      |                 |         |       |              |        |                   |  |

|           |                                                                                                   | Name all entities with whom you have this relationship or indicate none (add rows as needed)                                                                                                                                                                                                                         | Specifications/Comments (e.g., if payments were made to you or to your institution) |  |  |  |  |  |  |
|-----------|---------------------------------------------------------------------------------------------------|----------------------------------------------------------------------------------------------------------------------------------------------------------------------------------------------------------------------------------------------------------------------------------------------------------------------|-------------------------------------------------------------------------------------|--|--|--|--|--|--|
|           |                                                                                                   | Pfizer<br>Springbank Pharma                                                                                                                                                                                                                                                                                          |                                                                                     |  |  |  |  |  |  |
| <b>10</b> | Leadership or fiduciary role in other board, society, committee or advocacy group, paid or unpaid | <input checked="" type="checkbox"/> <b>None</b><br><table border="1" style="width: 100%; border-collapse: collapse;"> <tr><td style="width: 50%; height: 20px;"></td><td style="width: 50%;"></td></tr> <tr><td style="height: 20px;"></td><td></td></tr> <tr><td style="height: 20px;"></td><td></td></tr> </table> |                                                                                     |  |  |  |  |  |  |
|           |                                                                                                   |                                                                                                                                                                                                                                                                                                                      |                                                                                     |  |  |  |  |  |  |
|           |                                                                                                   |                                                                                                                                                                                                                                                                                                                      |                                                                                     |  |  |  |  |  |  |
|           |                                                                                                   |                                                                                                                                                                                                                                                                                                                      |                                                                                     |  |  |  |  |  |  |
| <b>11</b> | Stock or stock options                                                                            | <input checked="" type="checkbox"/> <b>None</b><br><table border="1" style="width: 100%; border-collapse: collapse;"> <tr><td style="width: 50%; height: 20px;"></td><td style="width: 50%;"></td></tr> <tr><td style="height: 20px;"></td><td></td></tr> <tr><td style="height: 20px;"></td><td></td></tr> </table> |                                                                                     |  |  |  |  |  |  |
|           |                                                                                                   |                                                                                                                                                                                                                                                                                                                      |                                                                                     |  |  |  |  |  |  |
|           |                                                                                                   |                                                                                                                                                                                                                                                                                                                      |                                                                                     |  |  |  |  |  |  |
|           |                                                                                                   |                                                                                                                                                                                                                                                                                                                      |                                                                                     |  |  |  |  |  |  |
| <b>12</b> | Receipt of equipment, materials, drugs, medical writing, gifts or other services                  | <input checked="" type="checkbox"/> <b>None</b><br><table border="1" style="width: 100%; border-collapse: collapse;"> <tr><td style="width: 50%; height: 20px;"></td><td style="width: 50%;"></td></tr> <tr><td style="height: 20px;"></td><td></td></tr> <tr><td style="height: 20px;"></td><td></td></tr> </table> |                                                                                     |  |  |  |  |  |  |
|           |                                                                                                   |                                                                                                                                                                                                                                                                                                                      |                                                                                     |  |  |  |  |  |  |
|           |                                                                                                   |                                                                                                                                                                                                                                                                                                                      |                                                                                     |  |  |  |  |  |  |
|           |                                                                                                   |                                                                                                                                                                                                                                                                                                                      |                                                                                     |  |  |  |  |  |  |
| <b>13</b> | Other financial or non-financial interests                                                        | <input checked="" type="checkbox"/> <b>None</b><br><table border="1" style="width: 100%; border-collapse: collapse;"> <tr><td style="width: 50%; height: 20px;"></td><td style="width: 50%;"></td></tr> <tr><td style="height: 20px;"></td><td></td></tr> <tr><td style="height: 20px;"></td><td></td></tr> </table> |                                                                                     |  |  |  |  |  |  |
|           |                                                                                                   |                                                                                                                                                                                                                                                                                                                      |                                                                                     |  |  |  |  |  |  |
|           |                                                                                                   |                                                                                                                                                                                                                                                                                                                      |                                                                                     |  |  |  |  |  |  |
|           |                                                                                                   |                                                                                                                                                                                                                                                                                                                      |                                                                                     |  |  |  |  |  |  |

**Please place an "X" next to the following statement to indicate your agreement:**

I certify that I have answered every question and have not altered the wording of any of the questions on this form.

## ICMJE DISCLOSURE FORM

**Date:** 8/7/2023

**Your Name:** Xiaoli Ma

**Manuscript Title:** Safety and off-treatment response of patients with chronic hepatitis B virus infection receiving long-term open-label vebicorvir

**Manuscript Number (if known):** [Click or tap here to enter text.](#)

In the interest of transparency, we ask you to disclose all relationships/activities/interests listed below that are related to the content of your manuscript. "Related" means any relation with for-profit or not-for-profit third parties whose interests may be affected by the content of the manuscript. Disclosure represents a commitment to transparency and does not necessarily indicate a bias. If you are in doubt about whether to list a relationship/activity/interest, it is preferable that you do so.

In the interest of transparency, we ask you to disclose all relationships/activities/interests listed below that are related to the content of your manuscript. "Related" means any relation with for-profit or not-for-profit third parties whose interests may be affected by the content of the manuscript. Disclosure represents a commitment to transparency and does not necessarily indicate a bias. If you are in doubt about whether to list a relationship/activity/interest, it is preferable that you do so.

The author's relationships/activities/interests should be defined broadly. For example, if your manuscript pertains to the epidemiology of hypertension, you should declare all relationships with manufacturers of antihypertensive medication, even if that medication is not mentioned in the manuscript.

In item #1 below, report all support for the work reported in this manuscript without time limit. For all other items, the time frame for disclosure is the past 36 months.

|                                                           |                                                                                                                                                                                | Name all entities with whom you have this relationship or indicate none (add rows as needed)                                                                                                                                                                   | Specifications/Comments (e.g., if payments were made to you or to your institution) |  |  |  |  |  |                                                                                                                 |
|-----------------------------------------------------------|--------------------------------------------------------------------------------------------------------------------------------------------------------------------------------|----------------------------------------------------------------------------------------------------------------------------------------------------------------------------------------------------------------------------------------------------------------|-------------------------------------------------------------------------------------|--|--|--|--|--|-----------------------------------------------------------------------------------------------------------------|
| <b>Time frame: Since the initial planning of the work</b> |                                                                                                                                                                                |                                                                                                                                                                                                                                                                |                                                                                     |  |  |  |  |  |                                                                                                                 |
| <b>1</b>                                                  | All support for the present manuscript (e.g., funding, provision of study materials, medical writing, article processing charges, etc.)<br><b>No time limit for this item.</b> | <input checked="" type="checkbox"/> <b>None</b><br><table border="1" style="width: 100%; height: 40px; margin-top: 5px;"> <tr><td style="width: 50%;"></td><td style="width: 50%;"></td></tr> <tr><td></td><td></td></tr> <tr><td></td><td></td></tr> </table> |                                                                                     |  |  |  |  |  | <div style="font-size: small; color: gray; text-align: center;">Click the tab key to add additional rows.</div> |
|                                                           |                                                                                                                                                                                |                                                                                                                                                                                                                                                                |                                                                                     |  |  |  |  |  |                                                                                                                 |
|                                                           |                                                                                                                                                                                |                                                                                                                                                                                                                                                                |                                                                                     |  |  |  |  |  |                                                                                                                 |
|                                                           |                                                                                                                                                                                |                                                                                                                                                                                                                                                                |                                                                                     |  |  |  |  |  |                                                                                                                 |
| <b>Time frame: past 36 months</b>                         |                                                                                                                                                                                |                                                                                                                                                                                                                                                                |                                                                                     |  |  |  |  |  |                                                                                                                 |
| <b>2</b>                                                  | Grants or contracts from any entity (if not indicated in item #1 above).                                                                                                       | <input checked="" type="checkbox"/> <b>None</b><br><table border="1" style="width: 100%; height: 40px; margin-top: 5px;"> <tr><td style="width: 50%;"></td><td style="width: 50%;"></td></tr> <tr><td></td><td></td></tr> <tr><td></td><td></td></tr> </table> |                                                                                     |  |  |  |  |  |                                                                                                                 |
|                                                           |                                                                                                                                                                                |                                                                                                                                                                                                                                                                |                                                                                     |  |  |  |  |  |                                                                                                                 |
|                                                           |                                                                                                                                                                                |                                                                                                                                                                                                                                                                |                                                                                     |  |  |  |  |  |                                                                                                                 |
|                                                           |                                                                                                                                                                                |                                                                                                                                                                                                                                                                |                                                                                     |  |  |  |  |  |                                                                                                                 |



|                 |                                                                                                              | Name all entities with whom you have this relationship or indicate none (add rows as needed)                                                                                                                                                                                                                                                                                                                                                                                                                                                                                   | Specifications/Comments (e.g., if payments were made to you or to your institution) |                 |  |  |  |  |  |  |  |
|-----------------|--------------------------------------------------------------------------------------------------------------|--------------------------------------------------------------------------------------------------------------------------------------------------------------------------------------------------------------------------------------------------------------------------------------------------------------------------------------------------------------------------------------------------------------------------------------------------------------------------------------------------------------------------------------------------------------------------------|-------------------------------------------------------------------------------------|-----------------|--|--|--|--|--|--|--|
| 3               | Royalties or licenses                                                                                        | <input checked="" type="checkbox"/> <b>None</b><br><table border="1" style="width: 100%; border-collapse: collapse;"> <tr><td style="width: 50%; height: 20px;"></td><td style="width: 50%;"></td></tr> <tr><td style="height: 20px;"></td><td></td></tr> <tr><td style="height: 20px;"></td><td></td></tr> </table>                                                                                                                                                                                                                                                           |                                                                                     |                 |  |  |  |  |  |  |  |
|                 |                                                                                                              |                                                                                                                                                                                                                                                                                                                                                                                                                                                                                                                                                                                |                                                                                     |                 |  |  |  |  |  |  |  |
|                 |                                                                                                              |                                                                                                                                                                                                                                                                                                                                                                                                                                                                                                                                                                                |                                                                                     |                 |  |  |  |  |  |  |  |
|                 |                                                                                                              |                                                                                                                                                                                                                                                                                                                                                                                                                                                                                                                                                                                |                                                                                     |                 |  |  |  |  |  |  |  |
| 4               | Consulting fees                                                                                              | <input type="checkbox"/> <b>None</b><br><table border="1" style="width: 100%; border-collapse: collapse;"> <tr> <td style="width: 50%; border-bottom: none;">Gilead Sciences</td> <td style="width: 50%; border-bottom: none;">Consultant</td> </tr> <tr><td style="border-bottom: none; height: 20px;"></td><td style="border-bottom: none;"></td></tr> <tr><td style="border-bottom: none; height: 20px;"></td><td style="border-bottom: none;"></td></tr> <tr><td style="border-bottom: none; height: 20px;"></td><td style="border-bottom: none;"></td></tr> </table>      | Gilead Sciences                                                                     | Consultant      |  |  |  |  |  |  |  |
| Gilead Sciences | Consultant                                                                                                   |                                                                                                                                                                                                                                                                                                                                                                                                                                                                                                                                                                                |                                                                                     |                 |  |  |  |  |  |  |  |
|                 |                                                                                                              |                                                                                                                                                                                                                                                                                                                                                                                                                                                                                                                                                                                |                                                                                     |                 |  |  |  |  |  |  |  |
|                 |                                                                                                              |                                                                                                                                                                                                                                                                                                                                                                                                                                                                                                                                                                                |                                                                                     |                 |  |  |  |  |  |  |  |
|                 |                                                                                                              |                                                                                                                                                                                                                                                                                                                                                                                                                                                                                                                                                                                |                                                                                     |                 |  |  |  |  |  |  |  |
| 5               | Payment or honoraria for lectures, presentations, speakers bureaus, manuscript writing or educational events | <input type="checkbox"/> <b>None</b><br><table border="1" style="width: 100%; border-collapse: collapse;"> <tr> <td style="width: 50%; border-bottom: none;">Gilead Sciences</td> <td style="width: 50%; border-bottom: none;">Speakers bureau</td> </tr> <tr><td style="border-bottom: none; height: 20px;"></td><td style="border-bottom: none;"></td></tr> <tr><td style="border-bottom: none; height: 20px;"></td><td style="border-bottom: none;"></td></tr> <tr><td style="border-bottom: none; height: 20px;"></td><td style="border-bottom: none;"></td></tr> </table> | Gilead Sciences                                                                     | Speakers bureau |  |  |  |  |  |  |  |
| Gilead Sciences | Speakers bureau                                                                                              |                                                                                                                                                                                                                                                                                                                                                                                                                                                                                                                                                                                |                                                                                     |                 |  |  |  |  |  |  |  |
|                 |                                                                                                              |                                                                                                                                                                                                                                                                                                                                                                                                                                                                                                                                                                                |                                                                                     |                 |  |  |  |  |  |  |  |
|                 |                                                                                                              |                                                                                                                                                                                                                                                                                                                                                                                                                                                                                                                                                                                |                                                                                     |                 |  |  |  |  |  |  |  |
|                 |                                                                                                              |                                                                                                                                                                                                                                                                                                                                                                                                                                                                                                                                                                                |                                                                                     |                 |  |  |  |  |  |  |  |
| 6               | Payment for expert testimony                                                                                 | <input checked="" type="checkbox"/> <b>None</b><br><table border="1" style="width: 100%; border-collapse: collapse;"> <tr><td style="width: 50%; height: 20px;"></td><td style="width: 50%;"></td></tr> <tr><td style="height: 20px;"></td><td></td></tr> <tr><td style="height: 20px;"></td><td></td></tr> </table>                                                                                                                                                                                                                                                           |                                                                                     |                 |  |  |  |  |  |  |  |
|                 |                                                                                                              |                                                                                                                                                                                                                                                                                                                                                                                                                                                                                                                                                                                |                                                                                     |                 |  |  |  |  |  |  |  |
|                 |                                                                                                              |                                                                                                                                                                                                                                                                                                                                                                                                                                                                                                                                                                                |                                                                                     |                 |  |  |  |  |  |  |  |
|                 |                                                                                                              |                                                                                                                                                                                                                                                                                                                                                                                                                                                                                                                                                                                |                                                                                     |                 |  |  |  |  |  |  |  |
| 7               | Support for attending meetings and/or travel                                                                 | <input checked="" type="checkbox"/> <b>None</b><br><table border="1" style="width: 100%; border-collapse: collapse;"> <tr><td style="width: 50%; height: 20px;"></td><td style="width: 50%;"></td></tr> <tr><td style="height: 20px;"></td><td></td></tr> <tr><td style="height: 20px;"></td><td></td></tr> </table>                                                                                                                                                                                                                                                           |                                                                                     |                 |  |  |  |  |  |  |  |
|                 |                                                                                                              |                                                                                                                                                                                                                                                                                                                                                                                                                                                                                                                                                                                |                                                                                     |                 |  |  |  |  |  |  |  |
|                 |                                                                                                              |                                                                                                                                                                                                                                                                                                                                                                                                                                                                                                                                                                                |                                                                                     |                 |  |  |  |  |  |  |  |
|                 |                                                                                                              |                                                                                                                                                                                                                                                                                                                                                                                                                                                                                                                                                                                |                                                                                     |                 |  |  |  |  |  |  |  |
| 8               | Patents planned, issued or pending                                                                           | <input checked="" type="checkbox"/> <b>None</b><br><table border="1" style="width: 100%; border-collapse: collapse;"> <tr><td style="width: 50%; height: 20px;"></td><td style="width: 50%;"></td></tr> <tr><td style="height: 20px;"></td><td></td></tr> <tr><td style="height: 20px;"></td><td></td></tr> </table>                                                                                                                                                                                                                                                           |                                                                                     |                 |  |  |  |  |  |  |  |
|                 |                                                                                                              |                                                                                                                                                                                                                                                                                                                                                                                                                                                                                                                                                                                |                                                                                     |                 |  |  |  |  |  |  |  |
|                 |                                                                                                              |                                                                                                                                                                                                                                                                                                                                                                                                                                                                                                                                                                                |                                                                                     |                 |  |  |  |  |  |  |  |
|                 |                                                                                                              |                                                                                                                                                                                                                                                                                                                                                                                                                                                                                                                                                                                |                                                                                     |                 |  |  |  |  |  |  |  |
| 9               | Participation on a Data Safety Monitoring Board or Advisory Board                                            | <input checked="" type="checkbox"/> <b>None</b><br><table border="1" style="width: 100%; border-collapse: collapse;"> <tr><td style="width: 50%; height: 20px;"></td><td style="width: 50%;"></td></tr> <tr><td style="height: 20px;"></td><td></td></tr> <tr><td style="height: 20px;"></td><td></td></tr> </table>                                                                                                                                                                                                                                                           |                                                                                     |                 |  |  |  |  |  |  |  |
|                 |                                                                                                              |                                                                                                                                                                                                                                                                                                                                                                                                                                                                                                                                                                                |                                                                                     |                 |  |  |  |  |  |  |  |
|                 |                                                                                                              |                                                                                                                                                                                                                                                                                                                                                                                                                                                                                                                                                                                |                                                                                     |                 |  |  |  |  |  |  |  |
|                 |                                                                                                              |                                                                                                                                                                                                                                                                                                                                                                                                                                                                                                                                                                                |                                                                                     |                 |  |  |  |  |  |  |  |
| 10              | Leadership or fiduciary role in other board,                                                                 | <input checked="" type="checkbox"/> <b>None</b><br><table border="1" style="width: 100%; border-collapse: collapse;"> <tr><td style="width: 50%; height: 20px;"></td><td style="width: 50%;"></td></tr> </table>                                                                                                                                                                                                                                                                                                                                                               |                                                                                     |                 |  |  |  |  |  |  |  |
|                 |                                                                                                              |                                                                                                                                                                                                                                                                                                                                                                                                                                                                                                                                                                                |                                                                                     |                 |  |  |  |  |  |  |  |

|           |                                                                                  | Name all entities with whom you have this relationship or indicate none (add rows as needed) | Specifications/Comments (e.g., if payments were made to you or to your institution) |
|-----------|----------------------------------------------------------------------------------|----------------------------------------------------------------------------------------------|-------------------------------------------------------------------------------------|
|           | society, committee or advocacy group, paid or unpaid                             |                                                                                              |                                                                                     |
| <b>11</b> | Stock or stock options                                                           | <input checked="" type="checkbox"/> <b>None</b>                                              |                                                                                     |
|           |                                                                                  |                                                                                              |                                                                                     |
|           |                                                                                  |                                                                                              |                                                                                     |
| <b>12</b> | Receipt of equipment, materials, drugs, medical writing, gifts or other services | <input checked="" type="checkbox"/> <b>None</b>                                              |                                                                                     |
|           |                                                                                  |                                                                                              |                                                                                     |
|           |                                                                                  |                                                                                              |                                                                                     |
| <b>13</b> | Other financial or non-financial interests                                       | <input checked="" type="checkbox"/> <b>None</b>                                              |                                                                                     |
|           |                                                                                  |                                                                                              |                                                                                     |
|           |                                                                                  |                                                                                              |                                                                                     |

Please place an "X" next to the following statement to indicate your agreement:

I certify that I have answered every question and have not altered the wording of any of the questions on this form.

## ICMJE DISCLOSURE FORM

**Date:** 8/7/2023

**Your Name:** Tuan T Nguyen

**Manuscript Title:** Safety and off-treatment response of patients with chronic hepatitis B virus infection receiving long-term open-label vebicorvir

**Manuscript Number (if known):** [Click or tap here to enter text.](#)

In the interest of transparency, we ask you to disclose all relationships/activities/interests listed below that are related to the content of your manuscript. "Related" means any relation with for-profit or not-for-profit third parties whose interests may be affected by the content of the manuscript. Disclosure represents a commitment to transparency and does not necessarily indicate a bias. If you are in doubt about whether to list a relationship/activity/interest, it is preferable that you do so.

In the interest of transparency, we ask you to disclose all relationships/activities/interests listed below that are related to the content of your manuscript. "Related" means any relation with for-profit or not-for-profit third parties whose interests may be affected by the content of the manuscript. Disclosure represents a commitment to transparency and does not necessarily indicate a bias. If you are in doubt about whether to list a relationship/activity/interest, it is preferable that you do so.

The author's relationships/activities/interests should be defined broadly. For example, if your manuscript pertains to the epidemiology of hypertension, you should declare all relationships with manufacturers of antihypertensive medication, even if that medication is not mentioned in the manuscript.

In item #1 below, report all support for the work reported in this manuscript without time limit. For all other items, the time frame for disclosure is the past 36 months.

|                                                    | Name all entities with whom you have this relationship or indicate none (add rows as needed)                                                                                   | Specifications/Comments (e.g., if payments were made to you or to your institution)                                                                                                                                                                                                                                                                                                                                    |                      |                        |                 |                        |  |                                           |
|----------------------------------------------------|--------------------------------------------------------------------------------------------------------------------------------------------------------------------------------|------------------------------------------------------------------------------------------------------------------------------------------------------------------------------------------------------------------------------------------------------------------------------------------------------------------------------------------------------------------------------------------------------------------------|----------------------|------------------------|-----------------|------------------------|--|-------------------------------------------|
| Time frame: Since the initial planning of the work |                                                                                                                                                                                |                                                                                                                                                                                                                                                                                                                                                                                                                        |                      |                        |                 |                        |  |                                           |
| <b>1</b>                                           | All support for the present manuscript (e.g., funding, provision of study materials, medical writing, article processing charges, etc.)<br><b>No time limit for this item.</b> | <input checked="" type="checkbox"/> <b>None</b><br><table border="1" style="width: 100%; border-collapse: collapse; margin-top: 5px;"> <tr><td style="height: 15px;"> </td><td style="width: 100px;"> </td></tr> <tr><td style="height: 15px;"> </td><td> </td></tr> <tr><td style="height: 15px;"> </td><td style="text-align: right; font-size: small;">Click the tab key to add additional rows.</td></tr> </table> |                      |                        |                 |                        |  | Click the tab key to add additional rows. |
|                                                    |                                                                                                                                                                                |                                                                                                                                                                                                                                                                                                                                                                                                                        |                      |                        |                 |                        |  |                                           |
|                                                    |                                                                                                                                                                                |                                                                                                                                                                                                                                                                                                                                                                                                                        |                      |                        |                 |                        |  |                                           |
|                                                    | Click the tab key to add additional rows.                                                                                                                                      |                                                                                                                                                                                                                                                                                                                                                                                                                        |                      |                        |                 |                        |  |                                           |
| Time frame: past 36 months                         |                                                                                                                                                                                |                                                                                                                                                                                                                                                                                                                                                                                                                        |                      |                        |                 |                        |  |                                           |
| <b>2</b>                                           | Grants or contracts from any entity (if not indicated in item #1 above).                                                                                                       | <input type="checkbox"/> <b>None</b><br><table border="1" style="width: 100%; border-collapse: collapse; margin-top: 5px;"> <tr> <td style="width: 50%;">Assembly Biosciences</td> <td style="width: 50%;">Research grant support</td> </tr> <tr> <td>Gilead Sciences</td> <td>Research grant support</td> </tr> </table>                                                                                              | Assembly Biosciences | Research grant support | Gilead Sciences | Research grant support |  |                                           |
| Assembly Biosciences                               | Research grant support                                                                                                                                                         |                                                                                                                                                                                                                                                                                                                                                                                                                        |                      |                        |                 |                        |  |                                           |
| Gilead Sciences                                    | Research grant support                                                                                                                                                         |                                                                                                                                                                                                                                                                                                                                                                                                                        |                      |                        |                 |                        |  |                                           |

|           |                                                                                                              | Name all entities with whom you have this relationship or indicate none (add rows as needed)                                                                                                                                                                                                                                                                           | Specifications/Comments (e.g., if payments were made to you or to your institution) |  |  |  |  |  |  |  |  |
|-----------|--------------------------------------------------------------------------------------------------------------|------------------------------------------------------------------------------------------------------------------------------------------------------------------------------------------------------------------------------------------------------------------------------------------------------------------------------------------------------------------------|-------------------------------------------------------------------------------------|--|--|--|--|--|--|--|--|
| <b>3</b>  | Royalties or licenses                                                                                        | <input checked="" type="checkbox"/> <b>None</b><br><table border="1" style="width: 100%; border-collapse: collapse;"> <tr><td style="width: 50%; height: 20px;"></td><td style="width: 50%;"></td></tr> <tr><td style="height: 20px;"></td><td></td></tr> <tr><td style="height: 20px;"></td><td></td></tr> </table>                                                   |                                                                                     |  |  |  |  |  |  |  |  |
|           |                                                                                                              |                                                                                                                                                                                                                                                                                                                                                                        |                                                                                     |  |  |  |  |  |  |  |  |
|           |                                                                                                              |                                                                                                                                                                                                                                                                                                                                                                        |                                                                                     |  |  |  |  |  |  |  |  |
|           |                                                                                                              |                                                                                                                                                                                                                                                                                                                                                                        |                                                                                     |  |  |  |  |  |  |  |  |
| <b>4</b>  | Consulting fees                                                                                              | <input checked="" type="checkbox"/> <b>None</b><br><table border="1" style="width: 100%; border-collapse: collapse;"> <tr><td style="width: 50%; height: 20px;"></td><td style="width: 50%;"></td></tr> <tr><td style="height: 20px;"></td><td></td></tr> <tr><td style="height: 20px;"></td><td></td></tr> </table>                                                   |                                                                                     |  |  |  |  |  |  |  |  |
|           |                                                                                                              |                                                                                                                                                                                                                                                                                                                                                                        |                                                                                     |  |  |  |  |  |  |  |  |
|           |                                                                                                              |                                                                                                                                                                                                                                                                                                                                                                        |                                                                                     |  |  |  |  |  |  |  |  |
|           |                                                                                                              |                                                                                                                                                                                                                                                                                                                                                                        |                                                                                     |  |  |  |  |  |  |  |  |
| <b>5</b>  | Payment or honoraria for lectures, presentations, speakers bureaus, manuscript writing or educational events | <input checked="" type="checkbox"/> <b>None</b><br><table border="1" style="width: 100%; border-collapse: collapse;"> <tr><td style="width: 50%; height: 20px;"></td><td style="width: 50%;"></td></tr> <tr><td style="height: 20px;"></td><td></td></tr> <tr><td style="height: 20px;"></td><td></td></tr> </table>                                                   |                                                                                     |  |  |  |  |  |  |  |  |
|           |                                                                                                              |                                                                                                                                                                                                                                                                                                                                                                        |                                                                                     |  |  |  |  |  |  |  |  |
|           |                                                                                                              |                                                                                                                                                                                                                                                                                                                                                                        |                                                                                     |  |  |  |  |  |  |  |  |
|           |                                                                                                              |                                                                                                                                                                                                                                                                                                                                                                        |                                                                                     |  |  |  |  |  |  |  |  |
| <b>6</b>  | Payment for expert testimony                                                                                 | <input checked="" type="checkbox"/> <b>None</b><br><table border="1" style="width: 100%; border-collapse: collapse;"> <tr><td style="width: 50%; height: 20px;"></td><td style="width: 50%;"></td></tr> <tr><td style="height: 20px;"></td><td></td></tr> <tr><td style="height: 20px;"></td><td></td></tr> </table>                                                   |                                                                                     |  |  |  |  |  |  |  |  |
|           |                                                                                                              |                                                                                                                                                                                                                                                                                                                                                                        |                                                                                     |  |  |  |  |  |  |  |  |
|           |                                                                                                              |                                                                                                                                                                                                                                                                                                                                                                        |                                                                                     |  |  |  |  |  |  |  |  |
|           |                                                                                                              |                                                                                                                                                                                                                                                                                                                                                                        |                                                                                     |  |  |  |  |  |  |  |  |
| <b>7</b>  | Support for attending meetings and/or travel                                                                 | <input checked="" type="checkbox"/> <b>None</b><br><table border="1" style="width: 100%; border-collapse: collapse;"> <tr><td style="width: 50%; height: 20px;"></td><td style="width: 50%;"></td></tr> <tr><td style="height: 20px;"></td><td></td></tr> <tr><td style="height: 20px;"></td><td></td></tr> </table>                                                   |                                                                                     |  |  |  |  |  |  |  |  |
|           |                                                                                                              |                                                                                                                                                                                                                                                                                                                                                                        |                                                                                     |  |  |  |  |  |  |  |  |
|           |                                                                                                              |                                                                                                                                                                                                                                                                                                                                                                        |                                                                                     |  |  |  |  |  |  |  |  |
|           |                                                                                                              |                                                                                                                                                                                                                                                                                                                                                                        |                                                                                     |  |  |  |  |  |  |  |  |
| <b>8</b>  | Patents planned, issued or pending                                                                           | <input checked="" type="checkbox"/> <b>None</b><br><table border="1" style="width: 100%; border-collapse: collapse;"> <tr><td style="width: 50%; height: 20px;"></td><td style="width: 50%;"></td></tr> <tr><td style="height: 20px;"></td><td></td></tr> <tr><td style="height: 20px;"></td><td></td></tr> </table>                                                   |                                                                                     |  |  |  |  |  |  |  |  |
|           |                                                                                                              |                                                                                                                                                                                                                                                                                                                                                                        |                                                                                     |  |  |  |  |  |  |  |  |
|           |                                                                                                              |                                                                                                                                                                                                                                                                                                                                                                        |                                                                                     |  |  |  |  |  |  |  |  |
|           |                                                                                                              |                                                                                                                                                                                                                                                                                                                                                                        |                                                                                     |  |  |  |  |  |  |  |  |
| <b>9</b>  | Participation on a Data Safety Monitoring Board or Advisory Board                                            | <input checked="" type="checkbox"/> <b>None</b><br><table border="1" style="width: 100%; border-collapse: collapse;"> <tr><td style="width: 50%; height: 20px;"></td><td style="width: 50%;"></td></tr> <tr><td style="height: 20px;"></td><td></td></tr> <tr><td style="height: 20px;"></td><td></td></tr> <tr><td style="height: 20px;"></td><td></td></tr> </table> |                                                                                     |  |  |  |  |  |  |  |  |
|           |                                                                                                              |                                                                                                                                                                                                                                                                                                                                                                        |                                                                                     |  |  |  |  |  |  |  |  |
|           |                                                                                                              |                                                                                                                                                                                                                                                                                                                                                                        |                                                                                     |  |  |  |  |  |  |  |  |
|           |                                                                                                              |                                                                                                                                                                                                                                                                                                                                                                        |                                                                                     |  |  |  |  |  |  |  |  |
|           |                                                                                                              |                                                                                                                                                                                                                                                                                                                                                                        |                                                                                     |  |  |  |  |  |  |  |  |
| <b>10</b> | Leadership or fiduciary role in                                                                              | <input checked="" type="checkbox"/> <b>None</b>                                                                                                                                                                                                                                                                                                                        |                                                                                     |  |  |  |  |  |  |  |  |

|           |                                                                                  | Name all entities with whom you have this relationship or indicate none (add rows as needed) | Specifications/Comments (e.g., if payments were made to you or to your institution) |
|-----------|----------------------------------------------------------------------------------|----------------------------------------------------------------------------------------------|-------------------------------------------------------------------------------------|
|           | other board, society, committee or advocacy group, paid or unpaid                |                                                                                              |                                                                                     |
| <b>11</b> | Stock or stock options                                                           | <input checked="" type="checkbox"/> <b>None</b>                                              |                                                                                     |
|           |                                                                                  |                                                                                              |                                                                                     |
| <b>12</b> | Receipt of equipment, materials, drugs, medical writing, gifts or other services | <input checked="" type="checkbox"/> <b>None</b>                                              |                                                                                     |
|           |                                                                                  |                                                                                              |                                                                                     |
| <b>13</b> | Other financial or non-financial interests                                       | <input checked="" type="checkbox"/> <b>None</b>                                              |                                                                                     |
|           |                                                                                  |                                                                                              |                                                                                     |

Please place an "X" next to the following statement to indicate your agreement:

I certify that I have answered every question and have not altered the wording of any of the questions on this form.

## ICMJE DISCLOSURE FORM

**Date:** 8/7/2023

**Your Name:** Tarek Hassanein

**Manuscript Title:** Safety and off-treatment response of patients with chronic hepatitis B virus infection receiving long-term open-label vebicorvir

**Manuscript Number (if known):** [Click or tap here to enter text.](#)

In the interest of transparency, we ask you to disclose all relationships/activities/interests listed below that are related to the content of your manuscript. "Related" means any relation with for-profit or not-for-profit third parties whose interests may be affected by the content of the manuscript. Disclosure represents a commitment to transparency and does not necessarily indicate a bias. If you are in doubt about whether to list a relationship/activity/interest, it is preferable that you do so.

In the interest of transparency, we ask you to disclose all relationships/activities/interests listed below that are related to the content of your manuscript. "Related" means any relation with for-profit or not-for-profit third parties whose interests may be affected by the content of the manuscript. Disclosure represents a commitment to transparency and does not necessarily indicate a bias. If you are in doubt about whether to list a relationship/activity/interest, it is preferable that you do so.

The author's relationships/activities/interests should be defined broadly. For example, if your manuscript pertains to the epidemiology of hypertension, you should declare all relationships with manufacturers of antihypertensive medication, even if that medication is not mentioned in the manuscript.

In item #1 below, report all support for the work reported in this manuscript without time limit. For all other items, the time frame for disclosure is the past 36 months.

|                                                    | Name all entities with whom you have this relationship or indicate none (add rows as needed)                                                                                   | Specifications/Comments (e.g., if payments were made to you or to your institution)                                                                                                                                                                                                                                                                                                                                                                                                                  |        |                                    |          |                      |             |                                           |                      |      |         |
|----------------------------------------------------|--------------------------------------------------------------------------------------------------------------------------------------------------------------------------------|------------------------------------------------------------------------------------------------------------------------------------------------------------------------------------------------------------------------------------------------------------------------------------------------------------------------------------------------------------------------------------------------------------------------------------------------------------------------------------------------------|--------|------------------------------------|----------|----------------------|-------------|-------------------------------------------|----------------------|------|---------|
| Time frame: Since the initial planning of the work |                                                                                                                                                                                |                                                                                                                                                                                                                                                                                                                                                                                                                                                                                                      |        |                                    |          |                      |             |                                           |                      |      |         |
| <b>1</b>                                           | All support for the present manuscript (e.g., funding, provision of study materials, medical writing, article processing charges, etc.)<br><b>No time limit for this item.</b> | <input checked="" type="checkbox"/> <b>None</b><br><table border="1" style="width: 100%; border-collapse: collapse; margin-top: 5px;"> <tr><td style="height: 15px;"> </td><td style="width: 100px;"> </td></tr> <tr><td style="height: 15px;"> </td><td> </td></tr> <tr><td style="height: 15px;"> </td><td style="text-align: right; font-size: small;">Click the tab key to add additional rows.</td></tr> </table>                                                                               |        |                                    |          |                      |             | Click the tab key to add additional rows. |                      |      |         |
|                                                    |                                                                                                                                                                                |                                                                                                                                                                                                                                                                                                                                                                                                                                                                                                      |        |                                    |          |                      |             |                                           |                      |      |         |
|                                                    |                                                                                                                                                                                |                                                                                                                                                                                                                                                                                                                                                                                                                                                                                                      |        |                                    |          |                      |             |                                           |                      |      |         |
|                                                    | Click the tab key to add additional rows.                                                                                                                                      |                                                                                                                                                                                                                                                                                                                                                                                                                                                                                                      |        |                                    |          |                      |             |                                           |                      |      |         |
| Time frame: past 36 months                         |                                                                                                                                                                                |                                                                                                                                                                                                                                                                                                                                                                                                                                                                                                      |        |                                    |          |                      |             |                                           |                      |      |         |
| <b>2</b>                                           | Grants or contracts from any entity (if not indicated in item #1 above).                                                                                                       | <input type="checkbox"/> <b>None</b><br><table border="1" style="width: 100%; border-collapse: collapse; margin-top: 5px;"> <tr><td style="width: 60%;">AbbVie</td><td rowspan="8" style="vertical-align: top;">Current grant and research support</td></tr> <tr><td>Allergan</td></tr> <tr><td>Assembly Biosciences</td></tr> <tr><td>AstraZeneca</td></tr> <tr><td>Boehringer-Ingelheim</td></tr> <tr><td>Bristol-Myers Squibb</td></tr> <tr><td>CARA</td></tr> <tr><td>Cytodyn</td></tr> </table> | AbbVie | Current grant and research support | Allergan | Assembly Biosciences | AstraZeneca | Boehringer-Ingelheim                      | Bristol-Myers Squibb | CARA | Cytodyn |
| AbbVie                                             | Current grant and research support                                                                                                                                             |                                                                                                                                                                                                                                                                                                                                                                                                                                                                                                      |        |                                    |          |                      |             |                                           |                      |      |         |
| Allergan                                           |                                                                                                                                                                                |                                                                                                                                                                                                                                                                                                                                                                                                                                                                                                      |        |                                    |          |                      |             |                                           |                      |      |         |
| Assembly Biosciences                               |                                                                                                                                                                                |                                                                                                                                                                                                                                                                                                                                                                                                                                                                                                      |        |                                    |          |                      |             |                                           |                      |      |         |
| AstraZeneca                                        |                                                                                                                                                                                |                                                                                                                                                                                                                                                                                                                                                                                                                                                                                                      |        |                                    |          |                      |             |                                           |                      |      |         |
| Boehringer-Ingelheim                               |                                                                                                                                                                                |                                                                                                                                                                                                                                                                                                                                                                                                                                                                                                      |        |                                    |          |                      |             |                                           |                      |      |         |
| Bristol-Myers Squibb                               |                                                                                                                                                                                |                                                                                                                                                                                                                                                                                                                                                                                                                                                                                                      |        |                                    |          |                      |             |                                           |                      |      |         |
| CARA                                               |                                                                                                                                                                                |                                                                                                                                                                                                                                                                                                                                                                                                                                                                                                      |        |                                    |          |                      |             |                                           |                      |      |         |
| Cytodyn                                            |                                                                                                                                                                                |                                                                                                                                                                                                                                                                                                                                                                                                                                                                                                      |        |                                    |          |                      |             |                                           |                      |      |         |

|                              |                                                                                                              | Name all entities with whom you have this relationship or indicate none (add rows as needed)                                                                                                                                                                                                                                                                      | Specifications/Comments (e.g., if payments were made to you or to your institution) |        |            |                      |                 |                              |       |          |
|------------------------------|--------------------------------------------------------------------------------------------------------------|-------------------------------------------------------------------------------------------------------------------------------------------------------------------------------------------------------------------------------------------------------------------------------------------------------------------------------------------------------------------|-------------------------------------------------------------------------------------|--------|------------|----------------------|-----------------|------------------------------|-------|----------|
|                              |                                                                                                              | DURECT Corporation<br>Enanta Pharmaceuticals<br>Galectin Therapeutics<br>Gilead Sciences<br>Grifols<br>Intercept Pharmaceuticals<br>Janssen<br>Merck<br>Mirum<br>Novartis<br>Novo Nordisk<br>Nucorion Pharmaceuticals<br>Pfizer<br>Salix Pharmaceuticals<br>Sonic Incytes<br>Terns Pharmaceuticals<br>Valeant                                                     | Current grant and research support                                                  |        |            |                      |                 |                              |       |          |
| 3                            | Royalties or licenses                                                                                        | <input checked="" type="checkbox"/> <b>None</b><br><table border="1" style="width: 100%; height: 40px;"> <tr><td></td><td></td></tr> <tr><td></td><td></td></tr> <tr><td></td><td></td></tr> </table>                                                                                                                                                             |                                                                                     |        |            |                      |                 |                              |       |          |
|                              |                                                                                                              |                                                                                                                                                                                                                                                                                                                                                                   |                                                                                     |        |            |                      |                 |                              |       |          |
|                              |                                                                                                              |                                                                                                                                                                                                                                                                                                                                                                   |                                                                                     |        |            |                      |                 |                              |       |          |
|                              |                                                                                                              |                                                                                                                                                                                                                                                                                                                                                                   |                                                                                     |        |            |                      |                 |                              |       |          |
| 4                            | Consulting fees                                                                                              | <input type="checkbox"/> <b>None</b><br><table border="1" style="width: 100%; height: 100px;"> <tr> <td style="width: 60%;">AbbVie</td> <td rowspan="6">Consultant</td> </tr> <tr><td>Bristol-Myers Squibb</td></tr> <tr><td>Gilead Sciences</td></tr> <tr><td>Mallinckrodt Pharmaceuticals</td></tr> <tr><td>Merck</td></tr> <tr><td>Ogranovo</td></tr> </table> |                                                                                     | AbbVie | Consultant | Bristol-Myers Squibb | Gilead Sciences | Mallinckrodt Pharmaceuticals | Merck | Ogranovo |
| AbbVie                       | Consultant                                                                                                   |                                                                                                                                                                                                                                                                                                                                                                   |                                                                                     |        |            |                      |                 |                              |       |          |
| Bristol-Myers Squibb         |                                                                                                              |                                                                                                                                                                                                                                                                                                                                                                   |                                                                                     |        |            |                      |                 |                              |       |          |
| Gilead Sciences              |                                                                                                              |                                                                                                                                                                                                                                                                                                                                                                   |                                                                                     |        |            |                      |                 |                              |       |          |
| Mallinckrodt Pharmaceuticals |                                                                                                              |                                                                                                                                                                                                                                                                                                                                                                   |                                                                                     |        |            |                      |                 |                              |       |          |
| Merck                        |                                                                                                              |                                                                                                                                                                                                                                                                                                                                                                   |                                                                                     |        |            |                      |                 |                              |       |          |
| Ogranovo                     |                                                                                                              |                                                                                                                                                                                                                                                                                                                                                                   |                                                                                     |        |            |                      |                 |                              |       |          |
| 5                            | Payment or honoraria for lectures, presentations, speakers bureaus, manuscript writing or educational events | <input checked="" type="checkbox"/> <b>None</b><br><table border="1" style="width: 100%; height: 40px;"> <tr><td></td><td></td></tr> <tr><td></td><td></td></tr> <tr><td></td><td></td></tr> </table>                                                                                                                                                             |                                                                                     |        |            |                      |                 |                              |       |          |
|                              |                                                                                                              |                                                                                                                                                                                                                                                                                                                                                                   |                                                                                     |        |            |                      |                 |                              |       |          |
|                              |                                                                                                              |                                                                                                                                                                                                                                                                                                                                                                   |                                                                                     |        |            |                      |                 |                              |       |          |
|                              |                                                                                                              |                                                                                                                                                                                                                                                                                                                                                                   |                                                                                     |        |            |                      |                 |                              |       |          |
| 6                            | Payment for expert testimony                                                                                 | <input checked="" type="checkbox"/> <b>None</b><br><table border="1" style="width: 100%; height: 40px;"> <tr><td></td><td></td></tr> <tr><td></td><td></td></tr> <tr><td></td><td></td></tr> </table>                                                                                                                                                             |                                                                                     |        |            |                      |                 |                              |       |          |
|                              |                                                                                                              |                                                                                                                                                                                                                                                                                                                                                                   |                                                                                     |        |            |                      |                 |                              |       |          |
|                              |                                                                                                              |                                                                                                                                                                                                                                                                                                                                                                   |                                                                                     |        |            |                      |                 |                              |       |          |
|                              |                                                                                                              |                                                                                                                                                                                                                                                                                                                                                                   |                                                                                     |        |            |                      |                 |                              |       |          |

|           |                                                                                                   | Name all entities with whom you have this relationship or indicate none (add rows as needed) | Specifications/Comments (e.g., if payments were made to you or to your institution) |
|-----------|---------------------------------------------------------------------------------------------------|----------------------------------------------------------------------------------------------|-------------------------------------------------------------------------------------|
| <b>7</b>  | Support for attending meetings and/or travel                                                      | <input checked="" type="checkbox"/> <b>None</b>                                              |                                                                                     |
|           |                                                                                                   |                                                                                              |                                                                                     |
|           |                                                                                                   |                                                                                              |                                                                                     |
| <b>8</b>  | Patents planned, issued or pending                                                                | <input checked="" type="checkbox"/> <b>None</b>                                              |                                                                                     |
|           |                                                                                                   |                                                                                              |                                                                                     |
|           |                                                                                                   |                                                                                              |                                                                                     |
| <b>9</b>  | Participation on a Data Safety Monitoring Board or Advisory Board                                 | <input type="checkbox"/> <b>None</b>                                                         |                                                                                     |
|           |                                                                                                   | AbbVie                                                                                       | Advisory committee or review panel                                                  |
|           |                                                                                                   | Bristol-Myers Squibb                                                                         |                                                                                     |
|           |                                                                                                   | Gilead Sciences                                                                              |                                                                                     |
|           |                                                                                                   | Mallinckrodt Pharmaceuticals                                                                 |                                                                                     |
|           |                                                                                                   | Merck                                                                                        |                                                                                     |
|           |                                                                                                   | Ogranovo                                                                                     |                                                                                     |
| <b>10</b> | Leadership or fiduciary role in other board, society, committee or advocacy group, paid or unpaid | <input checked="" type="checkbox"/> <b>None</b>                                              |                                                                                     |
|           |                                                                                                   |                                                                                              |                                                                                     |
|           |                                                                                                   |                                                                                              |                                                                                     |
| <b>11</b> | Stock or stock options                                                                            | <input checked="" type="checkbox"/> <b>None</b>                                              |                                                                                     |
|           |                                                                                                   |                                                                                              |                                                                                     |
|           |                                                                                                   |                                                                                              |                                                                                     |
| <b>12</b> | Receipt of equipment, materials, drugs, medical writing, gifts or other services                  | <input checked="" type="checkbox"/> <b>None</b>                                              |                                                                                     |
|           |                                                                                                   |                                                                                              |                                                                                     |
|           |                                                                                                   |                                                                                              |                                                                                     |
| <b>13</b> | Other financial or non-financial interests                                                        | <input checked="" type="checkbox"/> <b>None</b>                                              |                                                                                     |
|           |                                                                                                   |                                                                                              |                                                                                     |
|           |                                                                                                   |                                                                                              |                                                                                     |

Please place an "X" next to the following statement to indicate your agreement:



|                                     | <b>Name all entities with whom you have this relationship or indicate none (add rows as needed)</b>                  | <b>Specifications/Comments (e.g., if payments were made to you or to your institution)</b> |
|-------------------------------------|----------------------------------------------------------------------------------------------------------------------|--------------------------------------------------------------------------------------------|
| <input checked="" type="checkbox"/> | I certify that I have answered every question and have not altered the wording of any of the questions on this form. |                                                                                            |

## ICMJE DISCLOSURE FORM

**Date:** 8/7/2023

**Your Name:** Hie-Won Hann

**Manuscript Title:** Safety and off-treatment response of patients with chronic hepatitis B virus infection receiving long-term open-label vebicorvir

**Manuscript Number (if known):** [Click or tap here to enter text.](#)

In the interest of transparency, we ask you to disclose all relationships/activities/interests listed below that are related to the content of your manuscript. "Related" means any relation with for-profit or not-for-profit third parties whose interests may be affected by the content of the manuscript. Disclosure represents a commitment to transparency and does not necessarily indicate a bias. If you are in doubt about whether to list a relationship/activity/interest, it is preferable that you do so.

In the interest of transparency, we ask you to disclose all relationships/activities/interests listed below that are related to the content of your manuscript. "Related" means any relation with for-profit or not-for-profit third parties whose interests may be affected by the content of the manuscript. Disclosure represents a commitment to transparency and does not necessarily indicate a bias. If you are in doubt about whether to list a relationship/activity/interest, it is preferable that you do so.

The author's relationships/activities/interests should be defined broadly. For example, if your manuscript pertains to the epidemiology of hypertension, you should declare all relationships with manufacturers of antihypertensive medication, even if that medication is not mentioned in the manuscript.

In item #1 below, report all support for the work reported in this manuscript without time limit. For all other items, the time frame for disclosure is the past 36 months.

|                                                    | Name all entities with whom you have this relationship or indicate none (add rows as needed)                                                                                   | Specifications/Comments (e.g., if payments were made to you or to your institution)                                                                                                                                                                                                                                                                                                                                         |                 |                  |  |  |  |                                           |
|----------------------------------------------------|--------------------------------------------------------------------------------------------------------------------------------------------------------------------------------|-----------------------------------------------------------------------------------------------------------------------------------------------------------------------------------------------------------------------------------------------------------------------------------------------------------------------------------------------------------------------------------------------------------------------------|-----------------|------------------|--|--|--|-------------------------------------------|
| Time frame: Since the initial planning of the work |                                                                                                                                                                                |                                                                                                                                                                                                                                                                                                                                                                                                                             |                 |                  |  |  |  |                                           |
| <b>1</b>                                           | All support for the present manuscript (e.g., funding, provision of study materials, medical writing, article processing charges, etc.)<br><b>No time limit for this item.</b> | <input checked="" type="checkbox"/> <b>None</b><br><table border="1" style="width: 100%; border-collapse: collapse; margin-top: 5px;"> <tr><td style="width: 60%; height: 15px;"></td><td style="width: 40%;"></td></tr> <tr><td style="height: 15px;"></td><td></td></tr> <tr><td style="height: 15px;"></td><td style="text-align: right; font-size: small;">Click the tab key to add additional rows.</td></tr> </table> |                 |                  |  |  |  | Click the tab key to add additional rows. |
|                                                    |                                                                                                                                                                                |                                                                                                                                                                                                                                                                                                                                                                                                                             |                 |                  |  |  |  |                                           |
|                                                    |                                                                                                                                                                                |                                                                                                                                                                                                                                                                                                                                                                                                                             |                 |                  |  |  |  |                                           |
|                                                    | Click the tab key to add additional rows.                                                                                                                                      |                                                                                                                                                                                                                                                                                                                                                                                                                             |                 |                  |  |  |  |                                           |
| Time frame: past 36 months                         |                                                                                                                                                                                |                                                                                                                                                                                                                                                                                                                                                                                                                             |                 |                  |  |  |  |                                           |
| <b>2</b>                                           | Grants or contracts from any entity (if not indicated in item #1 above).                                                                                                       | <input type="checkbox"/> <b>None</b><br><table border="1" style="width: 100%; border-collapse: collapse; margin-top: 5px;"> <tr> <td style="width: 60%; padding: 2px;">Gilead Sciences</td> <td style="width: 40%; padding: 2px;">Research support</td> </tr> <tr> <td style="height: 15px;"></td> <td></td> </tr> </table>                                                                                                 | Gilead Sciences | Research support |  |  |  |                                           |
| Gilead Sciences                                    | Research support                                                                                                                                                               |                                                                                                                                                                                                                                                                                                                                                                                                                             |                 |                  |  |  |  |                                           |
|                                                    |                                                                                                                                                                                |                                                                                                                                                                                                                                                                                                                                                                                                                             |                 |                  |  |  |  |                                           |

|           |                                                                                                              | Name all entities with whom you have this relationship or indicate none (add rows as needed)                                                                                                                                                                                                                         | Specifications/Comments (e.g., if payments were made to you or to your institution) |  |  |  |  |  |  |
|-----------|--------------------------------------------------------------------------------------------------------------|----------------------------------------------------------------------------------------------------------------------------------------------------------------------------------------------------------------------------------------------------------------------------------------------------------------------|-------------------------------------------------------------------------------------|--|--|--|--|--|--|
| <b>3</b>  | Royalties or licenses                                                                                        | <input checked="" type="checkbox"/> <b>None</b><br><table border="1" style="width: 100%; border-collapse: collapse;"> <tr><td style="width: 50%; height: 20px;"></td><td style="width: 50%;"></td></tr> <tr><td style="height: 20px;"></td><td></td></tr> <tr><td style="height: 20px;"></td><td></td></tr> </table> |                                                                                     |  |  |  |  |  |  |
|           |                                                                                                              |                                                                                                                                                                                                                                                                                                                      |                                                                                     |  |  |  |  |  |  |
|           |                                                                                                              |                                                                                                                                                                                                                                                                                                                      |                                                                                     |  |  |  |  |  |  |
|           |                                                                                                              |                                                                                                                                                                                                                                                                                                                      |                                                                                     |  |  |  |  |  |  |
| <b>4</b>  | Consulting fees                                                                                              | <input checked="" type="checkbox"/> <b>None</b><br><table border="1" style="width: 100%; border-collapse: collapse;"> <tr><td style="width: 50%; height: 20px;"></td><td style="width: 50%;"></td></tr> <tr><td style="height: 20px;"></td><td></td></tr> <tr><td style="height: 20px;"></td><td></td></tr> </table> |                                                                                     |  |  |  |  |  |  |
|           |                                                                                                              |                                                                                                                                                                                                                                                                                                                      |                                                                                     |  |  |  |  |  |  |
|           |                                                                                                              |                                                                                                                                                                                                                                                                                                                      |                                                                                     |  |  |  |  |  |  |
|           |                                                                                                              |                                                                                                                                                                                                                                                                                                                      |                                                                                     |  |  |  |  |  |  |
| <b>5</b>  | Payment or honoraria for lectures, presentations, speakers bureaus, manuscript writing or educational events | <input checked="" type="checkbox"/> <b>None</b><br><table border="1" style="width: 100%; border-collapse: collapse;"> <tr><td style="width: 50%; height: 20px;"></td><td style="width: 50%;"></td></tr> <tr><td style="height: 20px;"></td><td></td></tr> <tr><td style="height: 20px;"></td><td></td></tr> </table> |                                                                                     |  |  |  |  |  |  |
|           |                                                                                                              |                                                                                                                                                                                                                                                                                                                      |                                                                                     |  |  |  |  |  |  |
|           |                                                                                                              |                                                                                                                                                                                                                                                                                                                      |                                                                                     |  |  |  |  |  |  |
|           |                                                                                                              |                                                                                                                                                                                                                                                                                                                      |                                                                                     |  |  |  |  |  |  |
| <b>6</b>  | Payment for expert testimony                                                                                 | <input checked="" type="checkbox"/> <b>None</b><br><table border="1" style="width: 100%; border-collapse: collapse;"> <tr><td style="width: 50%; height: 20px;"></td><td style="width: 50%;"></td></tr> <tr><td style="height: 20px;"></td><td></td></tr> <tr><td style="height: 20px;"></td><td></td></tr> </table> |                                                                                     |  |  |  |  |  |  |
|           |                                                                                                              |                                                                                                                                                                                                                                                                                                                      |                                                                                     |  |  |  |  |  |  |
|           |                                                                                                              |                                                                                                                                                                                                                                                                                                                      |                                                                                     |  |  |  |  |  |  |
|           |                                                                                                              |                                                                                                                                                                                                                                                                                                                      |                                                                                     |  |  |  |  |  |  |
| <b>7</b>  | Support for attending meetings and/or travel                                                                 | <input checked="" type="checkbox"/> <b>None</b><br><table border="1" style="width: 100%; border-collapse: collapse;"> <tr><td style="width: 50%; height: 20px;"></td><td style="width: 50%;"></td></tr> <tr><td style="height: 20px;"></td><td></td></tr> <tr><td style="height: 20px;"></td><td></td></tr> </table> |                                                                                     |  |  |  |  |  |  |
|           |                                                                                                              |                                                                                                                                                                                                                                                                                                                      |                                                                                     |  |  |  |  |  |  |
|           |                                                                                                              |                                                                                                                                                                                                                                                                                                                      |                                                                                     |  |  |  |  |  |  |
|           |                                                                                                              |                                                                                                                                                                                                                                                                                                                      |                                                                                     |  |  |  |  |  |  |
| <b>8</b>  | Patents planned, issued or pending                                                                           | <input checked="" type="checkbox"/> <b>None</b><br><table border="1" style="width: 100%; border-collapse: collapse;"> <tr><td style="width: 50%; height: 20px;"></td><td style="width: 50%;"></td></tr> <tr><td style="height: 20px;"></td><td></td></tr> <tr><td style="height: 20px;"></td><td></td></tr> </table> |                                                                                     |  |  |  |  |  |  |
|           |                                                                                                              |                                                                                                                                                                                                                                                                                                                      |                                                                                     |  |  |  |  |  |  |
|           |                                                                                                              |                                                                                                                                                                                                                                                                                                                      |                                                                                     |  |  |  |  |  |  |
|           |                                                                                                              |                                                                                                                                                                                                                                                                                                                      |                                                                                     |  |  |  |  |  |  |
| <b>9</b>  | Participation on a Data Safety Monitoring Board or Advisory Board                                            | <input checked="" type="checkbox"/> <b>None</b><br><table border="1" style="width: 100%; border-collapse: collapse;"> <tr><td style="width: 50%; height: 20px;"></td><td style="width: 50%;"></td></tr> <tr><td style="height: 20px;"></td><td></td></tr> <tr><td style="height: 20px;"></td><td></td></tr> </table> |                                                                                     |  |  |  |  |  |  |
|           |                                                                                                              |                                                                                                                                                                                                                                                                                                                      |                                                                                     |  |  |  |  |  |  |
|           |                                                                                                              |                                                                                                                                                                                                                                                                                                                      |                                                                                     |  |  |  |  |  |  |
|           |                                                                                                              |                                                                                                                                                                                                                                                                                                                      |                                                                                     |  |  |  |  |  |  |
| <b>10</b> | Leadership or fiduciary role in                                                                              | <input checked="" type="checkbox"/> <b>None</b>                                                                                                                                                                                                                                                                      |                                                                                     |  |  |  |  |  |  |

|           |                                                                                  | Name all entities with whom you have this relationship or indicate none (add rows as needed) | Specifications/Comments (e.g., if payments were made to you or to your institution) |
|-----------|----------------------------------------------------------------------------------|----------------------------------------------------------------------------------------------|-------------------------------------------------------------------------------------|
|           | other board, society, committee or advocacy group, paid or unpaid                |                                                                                              |                                                                                     |
| <b>11</b> | Stock or stock options                                                           | <input checked="" type="checkbox"/> <b>None</b>                                              |                                                                                     |
| <b>12</b> | Receipt of equipment, materials, drugs, medical writing, gifts or other services | <input checked="" type="checkbox"/> <b>None</b>                                              |                                                                                     |
| <b>13</b> | Other financial or non-financial interests                                       | <input type="checkbox"/> <b>None</b>                                                         |                                                                                     |
|           |                                                                                  | National Advisory Board                                                                      | Serves on                                                                           |

Please place an "X" next to the following statement to indicate your agreement:

I certify that I have answered every question and have not altered the wording of any of the questions on this form.

## ICMJE DISCLOSURE FORM

**Date:** 8/7/2023

**Your Name:** Magdy Elkhatab

**Manuscript Title:** Safety and off-treatment response of patients with chronic hepatitis B virus infection receiving long-term open-label vebicorvir

**Manuscript Number (if known):** [Click or tap here to enter text.](#)

In the interest of transparency, we ask you to disclose all relationships/activities/interests listed below that are related to the content of your manuscript. "Related" means any relation with for-profit or not-for-profit third parties whose interests may be affected by the content of the manuscript. Disclosure represents a commitment to transparency and does not necessarily indicate a bias. If you are in doubt about whether to list a relationship/activity/interest, it is preferable that you do so.

In the interest of transparency, we ask you to disclose all relationships/activities/interests listed below that are related to the content of your manuscript. "Related" means any relation with for-profit or not-for-profit third parties whose interests may be affected by the content of the manuscript. Disclosure represents a commitment to transparency and does not necessarily indicate a bias. If you are in doubt about whether to list a relationship/activity/interest, it is preferable that you do so.

The author's relationships/activities/interests should be defined broadly. For example, if your manuscript pertains to the epidemiology of hypertension, you should declare all relationships with manufacturers of antihypertensive medication, even if that medication is not mentioned in the manuscript.

In item #1 below, report all support for the work reported in this manuscript without time limit. For all other items, the time frame for disclosure is the past 36 months.

|                                                    | Name all entities with whom you have this relationship or indicate none (add rows as needed)                                                                                   | Specifications/Comments (e.g., if payments were made to you or to your institution)                                                                                                                                                                                                                                                                                                                                                        |        |               |                      |       |                 |       |
|----------------------------------------------------|--------------------------------------------------------------------------------------------------------------------------------------------------------------------------------|--------------------------------------------------------------------------------------------------------------------------------------------------------------------------------------------------------------------------------------------------------------------------------------------------------------------------------------------------------------------------------------------------------------------------------------------|--------|---------------|----------------------|-------|-----------------|-------|
| Time frame: Since the initial planning of the work |                                                                                                                                                                                |                                                                                                                                                                                                                                                                                                                                                                                                                                            |        |               |                      |       |                 |       |
| <b>1</b>                                           | All support for the present manuscript (e.g., funding, provision of study materials, medical writing, article processing charges, etc.)<br><b>No time limit for this item.</b> | <input checked="" type="checkbox"/> <b>None</b><br><table border="1" style="width: 100%; border-collapse: collapse; margin-top: 5px;"> <tr><td style="height: 15px;"> </td><td style="width: 150px;"> </td></tr> <tr><td style="height: 15px;"> </td><td> </td></tr> <tr><td style="height: 15px;"> </td><td> </td></tr> </table> <p style="font-size: small; color: gray; margin-top: 5px;">Click the tab key to add additional rows.</p> |        |               |                      |       |                 |       |
|                                                    |                                                                                                                                                                                |                                                                                                                                                                                                                                                                                                                                                                                                                                            |        |               |                      |       |                 |       |
|                                                    |                                                                                                                                                                                |                                                                                                                                                                                                                                                                                                                                                                                                                                            |        |               |                      |       |                 |       |
|                                                    |                                                                                                                                                                                |                                                                                                                                                                                                                                                                                                                                                                                                                                            |        |               |                      |       |                 |       |
| Time frame: past 36 months                         |                                                                                                                                                                                |                                                                                                                                                                                                                                                                                                                                                                                                                                            |        |               |                      |       |                 |       |
| <b>2</b>                                           | Grants or contracts from any entity (if not indicated in item #1 above).                                                                                                       | <input type="checkbox"/> <b>None</b><br><table border="1" style="width: 100%; border-collapse: collapse; margin-top: 5px;"> <tr><td style="width: 150px;">AbbVie</td><td rowspan="5" style="vertical-align: top;">Grant support</td></tr> <tr><td>Bristol-Myers Squibb</td></tr> <tr><td>Eisai</td></tr> <tr><td>Gilead Sciences</td></tr> <tr><td>Roche</td></tr> </table>                                                                | AbbVie | Grant support | Bristol-Myers Squibb | Eisai | Gilead Sciences | Roche |
| AbbVie                                             | Grant support                                                                                                                                                                  |                                                                                                                                                                                                                                                                                                                                                                                                                                            |        |               |                      |       |                 |       |
| Bristol-Myers Squibb                               |                                                                                                                                                                                |                                                                                                                                                                                                                                                                                                                                                                                                                                            |        |               |                      |       |                 |       |
| Eisai                                              |                                                                                                                                                                                |                                                                                                                                                                                                                                                                                                                                                                                                                                            |        |               |                      |       |                 |       |
| Gilead Sciences                                    |                                                                                                                                                                                |                                                                                                                                                                                                                                                                                                                                                                                                                                            |        |               |                      |       |                 |       |
| Roche                                              |                                                                                                                                                                                |                                                                                                                                                                                                                                                                                                                                                                                                                                            |        |               |                      |       |                 |       |

|                      |                                                                                                              | Name all entities with whom you have this relationship or indicate none (add rows as needed)                                                                                                                                                                                                                                                                                                                                                                                                                                 | Specifications/Comments (e.g., if payments were made to you or to your institution) |                     |                      |                 |       |  |  |  |  |  |  |  |  |  |  |
|----------------------|--------------------------------------------------------------------------------------------------------------|------------------------------------------------------------------------------------------------------------------------------------------------------------------------------------------------------------------------------------------------------------------------------------------------------------------------------------------------------------------------------------------------------------------------------------------------------------------------------------------------------------------------------|-------------------------------------------------------------------------------------|---------------------|----------------------|-----------------|-------|--|--|--|--|--|--|--|--|--|--|
| 3                    | Royalties or licenses                                                                                        | <input checked="" type="checkbox"/> <b>None</b><br><table border="1" style="width: 100%; border-collapse: collapse;"> <tr><td style="width: 50%; height: 20px;"></td><td style="width: 50%;"></td></tr> <tr><td style="height: 20px;"></td><td></td></tr> <tr><td style="height: 20px;"></td><td></td></tr> </table>                                                                                                                                                                                                         |                                                                                     |                     |                      |                 |       |  |  |  |  |  |  |  |  |  |  |
|                      |                                                                                                              |                                                                                                                                                                                                                                                                                                                                                                                                                                                                                                                              |                                                                                     |                     |                      |                 |       |  |  |  |  |  |  |  |  |  |  |
|                      |                                                                                                              |                                                                                                                                                                                                                                                                                                                                                                                                                                                                                                                              |                                                                                     |                     |                      |                 |       |  |  |  |  |  |  |  |  |  |  |
|                      |                                                                                                              |                                                                                                                                                                                                                                                                                                                                                                                                                                                                                                                              |                                                                                     |                     |                      |                 |       |  |  |  |  |  |  |  |  |  |  |
| 4                    | Consulting fees                                                                                              | <input checked="" type="checkbox"/> <b>None</b><br><table border="1" style="width: 100%; border-collapse: collapse;"> <tr><td style="width: 50%; height: 20px;"></td><td style="width: 50%;"></td></tr> <tr><td style="height: 20px;"></td><td></td></tr> </table> |                                                                                     |                     |                      |                 |       |  |  |  |  |  |  |  |  |  |  |
|                      |                                                                                                              |                                                                                                                                                                                                                                                                                                                                                                                                                                                                                                                              |                                                                                     |                     |                      |                 |       |  |  |  |  |  |  |  |  |  |  |
|                      |                                                                                                              |                                                                                                                                                                                                                                                                                                                                                                                                                                                                                                                              |                                                                                     |                     |                      |                 |       |  |  |  |  |  |  |  |  |  |  |
|                      |                                                                                                              |                                                                                                                                                                                                                                                                                                                                                                                                                                                                                                                              |                                                                                     |                     |                      |                 |       |  |  |  |  |  |  |  |  |  |  |
|                      |                                                                                                              |                                                                                                                                                                                                                                                                                                                                                                                                                                                                                                                              |                                                                                     |                     |                      |                 |       |  |  |  |  |  |  |  |  |  |  |
|                      |                                                                                                              |                                                                                                                                                                                                                                                                                                                                                                                                                                                                                                                              |                                                                                     |                     |                      |                 |       |  |  |  |  |  |  |  |  |  |  |
|                      |                                                                                                              |                                                                                                                                                                                                                                                                                                                                                                                                                                                                                                                              |                                                                                     |                     |                      |                 |       |  |  |  |  |  |  |  |  |  |  |
|                      |                                                                                                              |                                                                                                                                                                                                                                                                                                                                                                                                                                                                                                                              |                                                                                     |                     |                      |                 |       |  |  |  |  |  |  |  |  |  |  |
| 5                    | Payment or honoraria for lectures, presentations, speakers bureaus, manuscript writing or educational events | <input checked="" type="checkbox"/> <b>None</b><br><table border="1" style="width: 100%; border-collapse: collapse;"> <tr><td style="width: 50%; height: 20px;"></td><td style="width: 50%;"></td></tr> <tr><td style="height: 20px;"></td><td></td></tr> </table> |                                                                                     |                     |                      |                 |       |  |  |  |  |  |  |  |  |  |  |
|                      |                                                                                                              |                                                                                                                                                                                                                                                                                                                                                                                                                                                                                                                              |                                                                                     |                     |                      |                 |       |  |  |  |  |  |  |  |  |  |  |
|                      |                                                                                                              |                                                                                                                                                                                                                                                                                                                                                                                                                                                                                                                              |                                                                                     |                     |                      |                 |       |  |  |  |  |  |  |  |  |  |  |
|                      |                                                                                                              |                                                                                                                                                                                                                                                                                                                                                                                                                                                                                                                              |                                                                                     |                     |                      |                 |       |  |  |  |  |  |  |  |  |  |  |
|                      |                                                                                                              |                                                                                                                                                                                                                                                                                                                                                                                                                                                                                                                              |                                                                                     |                     |                      |                 |       |  |  |  |  |  |  |  |  |  |  |
|                      |                                                                                                              |                                                                                                                                                                                                                                                                                                                                                                                                                                                                                                                              |                                                                                     |                     |                      |                 |       |  |  |  |  |  |  |  |  |  |  |
|                      |                                                                                                              |                                                                                                                                                                                                                                                                                                                                                                                                                                                                                                                              |                                                                                     |                     |                      |                 |       |  |  |  |  |  |  |  |  |  |  |
|                      |                                                                                                              |                                                                                                                                                                                                                                                                                                                                                                                                                                                                                                                              |                                                                                     |                     |                      |                 |       |  |  |  |  |  |  |  |  |  |  |
| 6                    | Payment for expert testimony                                                                                 | <input checked="" type="checkbox"/> <b>None</b><br><table border="1" style="width: 100%; border-collapse: collapse;"> <tr><td style="width: 50%; height: 20px;"></td><td style="width: 50%;"></td></tr> <tr><td style="height: 20px;"></td><td></td></tr> <tr><td style="height: 20px;"></td><td></td></tr> </table>                                                                                                                                                                                                         |                                                                                     |                     |                      |                 |       |  |  |  |  |  |  |  |  |  |  |
|                      |                                                                                                              |                                                                                                                                                                                                                                                                                                                                                                                                                                                                                                                              |                                                                                     |                     |                      |                 |       |  |  |  |  |  |  |  |  |  |  |
|                      |                                                                                                              |                                                                                                                                                                                                                                                                                                                                                                                                                                                                                                                              |                                                                                     |                     |                      |                 |       |  |  |  |  |  |  |  |  |  |  |
|                      |                                                                                                              |                                                                                                                                                                                                                                                                                                                                                                                                                                                                                                                              |                                                                                     |                     |                      |                 |       |  |  |  |  |  |  |  |  |  |  |
| 7                    | Support for attending meetings and/or travel                                                                 | <input checked="" type="checkbox"/> <b>None</b><br><table border="1" style="width: 100%; border-collapse: collapse;"> <tr><td style="width: 50%; height: 20px;"></td><td style="width: 50%;"></td></tr> <tr><td style="height: 20px;"></td><td></td></tr> <tr><td style="height: 20px;"></td><td></td></tr> </table>                                                                                                                                                                                                         |                                                                                     |                     |                      |                 |       |  |  |  |  |  |  |  |  |  |  |
|                      |                                                                                                              |                                                                                                                                                                                                                                                                                                                                                                                                                                                                                                                              |                                                                                     |                     |                      |                 |       |  |  |  |  |  |  |  |  |  |  |
|                      |                                                                                                              |                                                                                                                                                                                                                                                                                                                                                                                                                                                                                                                              |                                                                                     |                     |                      |                 |       |  |  |  |  |  |  |  |  |  |  |
|                      |                                                                                                              |                                                                                                                                                                                                                                                                                                                                                                                                                                                                                                                              |                                                                                     |                     |                      |                 |       |  |  |  |  |  |  |  |  |  |  |
| 8                    | Patents planned, issued or pending                                                                           | <input checked="" type="checkbox"/> <b>None</b><br><table border="1" style="width: 100%; border-collapse: collapse;"> <tr><td style="width: 50%; height: 20px;"></td><td style="width: 50%;"></td></tr> <tr><td style="height: 20px;"></td><td></td></tr> <tr><td style="height: 20px;"></td><td></td></tr> </table>                                                                                                                                                                                                         |                                                                                     |                     |                      |                 |       |  |  |  |  |  |  |  |  |  |  |
|                      |                                                                                                              |                                                                                                                                                                                                                                                                                                                                                                                                                                                                                                                              |                                                                                     |                     |                      |                 |       |  |  |  |  |  |  |  |  |  |  |
|                      |                                                                                                              |                                                                                                                                                                                                                                                                                                                                                                                                                                                                                                                              |                                                                                     |                     |                      |                 |       |  |  |  |  |  |  |  |  |  |  |
|                      |                                                                                                              |                                                                                                                                                                                                                                                                                                                                                                                                                                                                                                                              |                                                                                     |                     |                      |                 |       |  |  |  |  |  |  |  |  |  |  |
| 9                    | Participation on a Data Safety Monitoring Board or Advisory Board                                            | <input type="checkbox"/> <b>None</b><br><table border="1" style="width: 100%; border-collapse: collapse;"> <tr> <td style="width: 50%; height: 20px;">AbbVie</td> <td rowspan="4" style="width: 50%; vertical-align: top;">Advisory board fees</td> </tr> <tr> <td style="height: 20px;">Bristol-Myers Squibb</td> </tr> <tr> <td style="height: 20px;">Gilead Sciences</td> </tr> <tr> <td style="height: 20px;">Merck</td> </tr> </table>                                                                                  | AbbVie                                                                              | Advisory board fees | Bristol-Myers Squibb | Gilead Sciences | Merck |  |  |  |  |  |  |  |  |  |  |
| AbbVie               | Advisory board fees                                                                                          |                                                                                                                                                                                                                                                                                                                                                                                                                                                                                                                              |                                                                                     |                     |                      |                 |       |  |  |  |  |  |  |  |  |  |  |
| Bristol-Myers Squibb |                                                                                                              |                                                                                                                                                                                                                                                                                                                                                                                                                                                                                                                              |                                                                                     |                     |                      |                 |       |  |  |  |  |  |  |  |  |  |  |
| Gilead Sciences      |                                                                                                              |                                                                                                                                                                                                                                                                                                                                                                                                                                                                                                                              |                                                                                     |                     |                      |                 |       |  |  |  |  |  |  |  |  |  |  |
| Merck                |                                                                                                              |                                                                                                                                                                                                                                                                                                                                                                                                                                                                                                                              |                                                                                     |                     |                      |                 |       |  |  |  |  |  |  |  |  |  |  |

|                                                                                                                                                                                                                                                               |                                                                                                   | Name all entities with whom you have this relationship or indicate none (add rows as needed)                                                                                                                                                                                                                                                                                                                                   | Specifications/Comments (e.g., if payments were made to you or to your institution) |  |  |  |  |  |  |
|---------------------------------------------------------------------------------------------------------------------------------------------------------------------------------------------------------------------------------------------------------------|---------------------------------------------------------------------------------------------------|--------------------------------------------------------------------------------------------------------------------------------------------------------------------------------------------------------------------------------------------------------------------------------------------------------------------------------------------------------------------------------------------------------------------------------|-------------------------------------------------------------------------------------|--|--|--|--|--|--|
| <b>10</b>                                                                                                                                                                                                                                                     | Leadership or fiduciary role in other board, society, committee or advocacy group, paid or unpaid | <input checked="" type="checkbox"/> <b>None</b><br><table border="1" style="width: 100%; border-collapse: collapse;"> <tr><td style="width: 50%; height: 20px;"></td><td style="width: 50%; height: 20px;"></td></tr> <tr><td style="width: 50%; height: 20px;"></td><td style="width: 50%; height: 20px;"></td></tr> <tr><td style="width: 50%; height: 20px;"></td><td style="width: 50%; height: 20px;"></td></tr> </table> |                                                                                     |  |  |  |  |  |  |
|                                                                                                                                                                                                                                                               |                                                                                                   |                                                                                                                                                                                                                                                                                                                                                                                                                                |                                                                                     |  |  |  |  |  |  |
|                                                                                                                                                                                                                                                               |                                                                                                   |                                                                                                                                                                                                                                                                                                                                                                                                                                |                                                                                     |  |  |  |  |  |  |
|                                                                                                                                                                                                                                                               |                                                                                                   |                                                                                                                                                                                                                                                                                                                                                                                                                                |                                                                                     |  |  |  |  |  |  |
| <b>11</b>                                                                                                                                                                                                                                                     | Stock or stock options                                                                            | <input checked="" type="checkbox"/> <b>None</b><br><table border="1" style="width: 100%; border-collapse: collapse;"> <tr><td style="width: 50%; height: 20px;"></td><td style="width: 50%; height: 20px;"></td></tr> <tr><td style="width: 50%; height: 20px;"></td><td style="width: 50%; height: 20px;"></td></tr> <tr><td style="width: 50%; height: 20px;"></td><td style="width: 50%; height: 20px;"></td></tr> </table> |                                                                                     |  |  |  |  |  |  |
|                                                                                                                                                                                                                                                               |                                                                                                   |                                                                                                                                                                                                                                                                                                                                                                                                                                |                                                                                     |  |  |  |  |  |  |
|                                                                                                                                                                                                                                                               |                                                                                                   |                                                                                                                                                                                                                                                                                                                                                                                                                                |                                                                                     |  |  |  |  |  |  |
|                                                                                                                                                                                                                                                               |                                                                                                   |                                                                                                                                                                                                                                                                                                                                                                                                                                |                                                                                     |  |  |  |  |  |  |
| <b>12</b>                                                                                                                                                                                                                                                     | Receipt of equipment, materials, drugs, medical writing, gifts or other services                  | <input checked="" type="checkbox"/> <b>None</b><br><table border="1" style="width: 100%; border-collapse: collapse;"> <tr><td style="width: 50%; height: 20px;"></td><td style="width: 50%; height: 20px;"></td></tr> <tr><td style="width: 50%; height: 20px;"></td><td style="width: 50%; height: 20px;"></td></tr> <tr><td style="width: 50%; height: 20px;"></td><td style="width: 50%; height: 20px;"></td></tr> </table> |                                                                                     |  |  |  |  |  |  |
|                                                                                                                                                                                                                                                               |                                                                                                   |                                                                                                                                                                                                                                                                                                                                                                                                                                |                                                                                     |  |  |  |  |  |  |
|                                                                                                                                                                                                                                                               |                                                                                                   |                                                                                                                                                                                                                                                                                                                                                                                                                                |                                                                                     |  |  |  |  |  |  |
|                                                                                                                                                                                                                                                               |                                                                                                   |                                                                                                                                                                                                                                                                                                                                                                                                                                |                                                                                     |  |  |  |  |  |  |
| <b>13</b>                                                                                                                                                                                                                                                     | Other financial or non-financial interests                                                        | <input checked="" type="checkbox"/> <b>None</b><br><table border="1" style="width: 100%; border-collapse: collapse;"> <tr><td style="width: 50%; height: 20px;"></td><td style="width: 50%; height: 20px;"></td></tr> <tr><td style="width: 50%; height: 20px;"></td><td style="width: 50%; height: 20px;"></td></tr> <tr><td style="width: 50%; height: 20px;"></td><td style="width: 50%; height: 20px;"></td></tr> </table> |                                                                                     |  |  |  |  |  |  |
|                                                                                                                                                                                                                                                               |                                                                                                   |                                                                                                                                                                                                                                                                                                                                                                                                                                |                                                                                     |  |  |  |  |  |  |
|                                                                                                                                                                                                                                                               |                                                                                                   |                                                                                                                                                                                                                                                                                                                                                                                                                                |                                                                                     |  |  |  |  |  |  |
|                                                                                                                                                                                                                                                               |                                                                                                   |                                                                                                                                                                                                                                                                                                                                                                                                                                |                                                                                     |  |  |  |  |  |  |
| <p><b>Please place an "X" next to the following statement to indicate your agreement:</b></p> <p><input checked="" type="checkbox"/> I certify that I have answered every question and have not altered the wording of any of the questions on this form.</p> |                                                                                                   |                                                                                                                                                                                                                                                                                                                                                                                                                                |                                                                                     |  |  |  |  |  |  |

## ICMJE DISCLOSURE FORM

**Date:** 8/7/2023

**Your Name:** Ronald G Nahass

**Manuscript Title:** Safety and off-treatment response of patients with chronic hepatitis B virus infection receiving long-term open-label vebicorvir

**Manuscript Number (if known):** [Click or tap here to enter text.](#)

In the interest of transparency, we ask you to disclose all relationships/activities/interests listed below that are related to the content of your manuscript. "Related" means any relation with for-profit or not-for-profit third parties whose interests may be affected by the content of the manuscript. Disclosure represents a commitment to transparency and does not necessarily indicate a bias. If you are in doubt about whether to list a relationship/activity/interest, it is preferable that you do so.

In the interest of transparency, we ask you to disclose all relationships/activities/interests listed below that are related to the content of your manuscript. "Related" means any relation with for-profit or not-for-profit third parties whose interests may be affected by the content of the manuscript. Disclosure represents a commitment to transparency and does not necessarily indicate a bias. If you are in doubt about whether to list a relationship/activity/interest, it is preferable that you do so.

The author's relationships/activities/interests should be defined broadly. For example, if your manuscript pertains to the epidemiology of hypertension, you should declare all relationships with manufacturers of antihypertensive medication, even if that medication is not mentioned in the manuscript.

In item #1 below, report all support for the work reported in this manuscript without time limit. For all other items, the time frame for disclosure is the past 36 months.

|                                                    | Name all entities with whom you have this relationship or indicate none (add rows as needed)                                                                                   | Specifications/Comments (e.g., if payments were made to you or to your institution)                                                                                                                                                                                                                                                                                                                                                        |        |                        |                 |         |       |  |
|----------------------------------------------------|--------------------------------------------------------------------------------------------------------------------------------------------------------------------------------|--------------------------------------------------------------------------------------------------------------------------------------------------------------------------------------------------------------------------------------------------------------------------------------------------------------------------------------------------------------------------------------------------------------------------------------------|--------|------------------------|-----------------|---------|-------|--|
| Time frame: Since the initial planning of the work |                                                                                                                                                                                |                                                                                                                                                                                                                                                                                                                                                                                                                                            |        |                        |                 |         |       |  |
| <b>1</b>                                           | All support for the present manuscript (e.g., funding, provision of study materials, medical writing, article processing charges, etc.)<br><b>No time limit for this item.</b> | <input checked="" type="checkbox"/> <b>None</b><br><table border="1" style="width: 100%; border-collapse: collapse; margin-top: 5px;"> <tr><td style="height: 15px;"> </td><td style="width: 100px;"> </td></tr> <tr><td style="height: 15px;"> </td><td> </td></tr> <tr><td style="height: 15px;"> </td><td> </td></tr> </table> <p style="font-size: small; color: gray; margin-top: 5px;">Click the tab key to add additional rows.</p> |        |                        |                 |         |       |  |
|                                                    |                                                                                                                                                                                |                                                                                                                                                                                                                                                                                                                                                                                                                                            |        |                        |                 |         |       |  |
|                                                    |                                                                                                                                                                                |                                                                                                                                                                                                                                                                                                                                                                                                                                            |        |                        |                 |         |       |  |
|                                                    |                                                                                                                                                                                |                                                                                                                                                                                                                                                                                                                                                                                                                                            |        |                        |                 |         |       |  |
| Time frame: past 36 months                         |                                                                                                                                                                                |                                                                                                                                                                                                                                                                                                                                                                                                                                            |        |                        |                 |         |       |  |
| <b>2</b>                                           | Grants or contracts from any entity (if not indicated in item #1 above).                                                                                                       | <input type="checkbox"/> <b>None</b><br><table border="1" style="width: 100%; border-collapse: collapse; margin-top: 5px;"> <tr><td style="width: 30%;">AbbVie</td><td rowspan="4" style="width: 70%;">Conducted Research for</td></tr> <tr><td>Gilead Sciences</td></tr> <tr><td>Janssen</td></tr> <tr><td>Merck</td></tr> </table>                                                                                                       | AbbVie | Conducted Research for | Gilead Sciences | Janssen | Merck |  |
| AbbVie                                             | Conducted Research for                                                                                                                                                         |                                                                                                                                                                                                                                                                                                                                                                                                                                            |        |                        |                 |         |       |  |
| Gilead Sciences                                    |                                                                                                                                                                                |                                                                                                                                                                                                                                                                                                                                                                                                                                            |        |                        |                 |         |       |  |
| Janssen                                            |                                                                                                                                                                                |                                                                                                                                                                                                                                                                                                                                                                                                                                            |        |                        |                 |         |       |  |
| Merck                                              |                                                                                                                                                                                |                                                                                                                                                                                                                                                                                                                                                                                                                                            |        |                        |                 |         |       |  |



|                 |                                                                                                              | Name all entities with whom you have this relationship or indicate none (add rows as needed)                                                                                                                                                                                                                         | Specifications/Comments (e.g., if payments were made to you or to your institution) |                 |         |       |       |  |  |
|-----------------|--------------------------------------------------------------------------------------------------------------|----------------------------------------------------------------------------------------------------------------------------------------------------------------------------------------------------------------------------------------------------------------------------------------------------------------------|-------------------------------------------------------------------------------------|-----------------|---------|-------|-------|--|--|
| 3               | Royalties or licenses                                                                                        | <input checked="" type="checkbox"/> <b>None</b><br><table border="1" style="width: 100%; border-collapse: collapse;"> <tr><td style="width: 50%; height: 20px;"></td><td style="width: 50%;"></td></tr> <tr><td style="height: 20px;"></td><td></td></tr> <tr><td style="height: 20px;"></td><td></td></tr> </table> |                                                                                     |                 |         |       |       |  |  |
|                 |                                                                                                              |                                                                                                                                                                                                                                                                                                                      |                                                                                     |                 |         |       |       |  |  |
|                 |                                                                                                              |                                                                                                                                                                                                                                                                                                                      |                                                                                     |                 |         |       |       |  |  |
|                 |                                                                                                              |                                                                                                                                                                                                                                                                                                                      |                                                                                     |                 |         |       |       |  |  |
| 4               | Consulting fees                                                                                              | <input checked="" type="checkbox"/> <b>None</b><br><table border="1" style="width: 100%; border-collapse: collapse;"> <tr><td style="width: 50%; height: 20px;"></td><td style="width: 50%;"></td></tr> <tr><td style="height: 20px;"></td><td></td></tr> <tr><td style="height: 20px;"></td><td></td></tr> </table> |                                                                                     |                 |         |       |       |  |  |
|                 |                                                                                                              |                                                                                                                                                                                                                                                                                                                      |                                                                                     |                 |         |       |       |  |  |
|                 |                                                                                                              |                                                                                                                                                                                                                                                                                                                      |                                                                                     |                 |         |       |       |  |  |
|                 |                                                                                                              |                                                                                                                                                                                                                                                                                                                      |                                                                                     |                 |         |       |       |  |  |
| 5               | Payment or honoraria for lectures, presentations, speakers bureaus, manuscript writing or educational events | <input type="checkbox"/> <b>None</b><br><table border="1" style="width: 100%; border-collapse: collapse;"> <tr> <td style="width: 50%;">Gilead Sciences</td> <td style="width: 50%;">Speaker</td> </tr> <tr> <td>Janssen</td> <td></td> </tr> <tr> <td>Merck</td> <td></td> </tr> </table>                           | Gilead Sciences                                                                     | Speaker         | Janssen |       | Merck |  |  |
| Gilead Sciences | Speaker                                                                                                      |                                                                                                                                                                                                                                                                                                                      |                                                                                     |                 |         |       |       |  |  |
| Janssen         |                                                                                                              |                                                                                                                                                                                                                                                                                                                      |                                                                                     |                 |         |       |       |  |  |
| Merck           |                                                                                                              |                                                                                                                                                                                                                                                                                                                      |                                                                                     |                 |         |       |       |  |  |
| 6               | Payment for expert testimony                                                                                 | <input checked="" type="checkbox"/> <b>None</b><br><table border="1" style="width: 100%; border-collapse: collapse;"> <tr><td style="width: 50%; height: 20px;"></td><td style="width: 50%;"></td></tr> <tr><td style="height: 20px;"></td><td></td></tr> <tr><td style="height: 20px;"></td><td></td></tr> </table> |                                                                                     |                 |         |       |       |  |  |
|                 |                                                                                                              |                                                                                                                                                                                                                                                                                                                      |                                                                                     |                 |         |       |       |  |  |
|                 |                                                                                                              |                                                                                                                                                                                                                                                                                                                      |                                                                                     |                 |         |       |       |  |  |
|                 |                                                                                                              |                                                                                                                                                                                                                                                                                                                      |                                                                                     |                 |         |       |       |  |  |
| 7               | Support for attending meetings and/or travel                                                                 | <input checked="" type="checkbox"/> <b>None</b><br><table border="1" style="width: 100%; border-collapse: collapse;"> <tr><td style="width: 50%; height: 20px;"></td><td style="width: 50%;"></td></tr> <tr><td style="height: 20px;"></td><td></td></tr> <tr><td style="height: 20px;"></td><td></td></tr> </table> |                                                                                     |                 |         |       |       |  |  |
|                 |                                                                                                              |                                                                                                                                                                                                                                                                                                                      |                                                                                     |                 |         |       |       |  |  |
|                 |                                                                                                              |                                                                                                                                                                                                                                                                                                                      |                                                                                     |                 |         |       |       |  |  |
|                 |                                                                                                              |                                                                                                                                                                                                                                                                                                                      |                                                                                     |                 |         |       |       |  |  |
| 8               | Patents planned, issued or pending                                                                           | <input checked="" type="checkbox"/> <b>None</b><br><table border="1" style="width: 100%; border-collapse: collapse;"> <tr><td style="width: 50%; height: 20px;"></td><td style="width: 50%;"></td></tr> <tr><td style="height: 20px;"></td><td></td></tr> <tr><td style="height: 20px;"></td><td></td></tr> </table> |                                                                                     |                 |         |       |       |  |  |
|                 |                                                                                                              |                                                                                                                                                                                                                                                                                                                      |                                                                                     |                 |         |       |       |  |  |
|                 |                                                                                                              |                                                                                                                                                                                                                                                                                                                      |                                                                                     |                 |         |       |       |  |  |
|                 |                                                                                                              |                                                                                                                                                                                                                                                                                                                      |                                                                                     |                 |         |       |       |  |  |
| 9               | Participation on a Data Safety Monitoring Board or Advisory Board                                            | <input type="checkbox"/> <b>None</b><br><table border="1" style="width: 100%; border-collapse: collapse;"> <tr> <td style="width: 50%;">Gilead Sciences</td> <td rowspan="3" style="width: 50%;">Advisory boards</td> </tr> <tr> <td>Janssen</td> </tr> <tr> <td>Merck</td> </tr> </table>                           | Gilead Sciences                                                                     | Advisory boards | Janssen | Merck |       |  |  |
| Gilead Sciences | Advisory boards                                                                                              |                                                                                                                                                                                                                                                                                                                      |                                                                                     |                 |         |       |       |  |  |
| Janssen         |                                                                                                              |                                                                                                                                                                                                                                                                                                                      |                                                                                     |                 |         |       |       |  |  |
| Merck           |                                                                                                              |                                                                                                                                                                                                                                                                                                                      |                                                                                     |                 |         |       |       |  |  |
| 10              | Leadership or fiduciary role in other board,                                                                 | <input checked="" type="checkbox"/> <b>None</b><br><table border="1" style="width: 100%; border-collapse: collapse;"> <tr><td style="width: 50%; height: 20px;"></td><td style="width: 50%;"></td></tr> </table>                                                                                                     |                                                                                     |                 |         |       |       |  |  |
|                 |                                                                                                              |                                                                                                                                                                                                                                                                                                                      |                                                                                     |                 |         |       |       |  |  |

|           |                                                                                  | Name all entities with whom you have this relationship or indicate none (add rows as needed) | Specifications/Comments (e.g., if payments were made to you or to your institution) |
|-----------|----------------------------------------------------------------------------------|----------------------------------------------------------------------------------------------|-------------------------------------------------------------------------------------|
|           | society, committee or advocacy group, paid or unpaid                             |                                                                                              |                                                                                     |
| <b>11</b> | Stock or stock options                                                           | <input checked="" type="checkbox"/> <b>None</b>                                              |                                                                                     |
|           |                                                                                  |                                                                                              |                                                                                     |
|           |                                                                                  |                                                                                              |                                                                                     |
| <b>12</b> | Receipt of equipment, materials, drugs, medical writing, gifts or other services | <input checked="" type="checkbox"/> <b>None</b>                                              |                                                                                     |
|           |                                                                                  |                                                                                              |                                                                                     |
|           |                                                                                  |                                                                                              |                                                                                     |
| <b>13</b> | Other financial or non-financial interests                                       | <input checked="" type="checkbox"/> <b>None</b>                                              |                                                                                     |
|           |                                                                                  |                                                                                              |                                                                                     |
|           |                                                                                  |                                                                                              |                                                                                     |

Please place an "X" next to the following statement to indicate your agreement:

I certify that I have answered every question and have not altered the wording of any of the questions on this form.

## ICMJE DISCLOSURE FORM

**Date:** 8/7/2023

**Your Name:** James S Park

**Manuscript Title:** Safety and off-treatment response of patients with chronic hepatitis B virus infection receiving long-term open-label vebicorvir

**Manuscript Number (if known):** [Click or tap here to enter text.](#)

In the interest of transparency, we ask you to disclose all relationships/activities/interests listed below that are related to the content of your manuscript. "Related" means any relation with for-profit or not-for-profit third parties whose interests may be affected by the content of the manuscript. Disclosure represents a commitment to transparency and does not necessarily indicate a bias. If you are in doubt about whether to list a relationship/activity/interest, it is preferable that you do so.

In the interest of transparency, we ask you to disclose all relationships/activities/interests listed below that are related to the content of your manuscript. "Related" means any relation with for-profit or not-for-profit third parties whose interests may be affected by the content of the manuscript. Disclosure represents a commitment to transparency and does not necessarily indicate a bias. If you are in doubt about whether to list a relationship/activity/interest, it is preferable that you do so.

The author's relationships/activities/interests should be defined broadly. For example, if your manuscript pertains to the epidemiology of hypertension, you should declare all relationships with manufacturers of antihypertensive medication, even if that medication is not mentioned in the manuscript.

In item #1 below, report all support for the work reported in this manuscript without time limit. For all other items, the time frame for disclosure is the past 36 months.

|                                                    | Name all entities with whom you have this relationship or indicate none (add rows as needed)                                                                                   | Specifications/Comments (e.g., if payments were made to you or to your institution)                                                                                                                                                                                                                                                                                                                                         |                      |                 |                 |  |  |                                           |
|----------------------------------------------------|--------------------------------------------------------------------------------------------------------------------------------------------------------------------------------|-----------------------------------------------------------------------------------------------------------------------------------------------------------------------------------------------------------------------------------------------------------------------------------------------------------------------------------------------------------------------------------------------------------------------------|----------------------|-----------------|-----------------|--|--|-------------------------------------------|
| Time frame: Since the initial planning of the work |                                                                                                                                                                                |                                                                                                                                                                                                                                                                                                                                                                                                                             |                      |                 |                 |  |  |                                           |
| <b>1</b>                                           | All support for the present manuscript (e.g., funding, provision of study materials, medical writing, article processing charges, etc.)<br><b>No time limit for this item.</b> | <input checked="" type="checkbox"/> <b>None</b><br><table border="1" style="width: 100%; border-collapse: collapse; margin-top: 5px;"> <tr><td style="width: 60%; height: 20px;"></td><td style="width: 40%;"></td></tr> <tr><td style="height: 20px;"></td><td></td></tr> <tr><td style="height: 20px;"></td><td style="text-align: right; font-size: small;">Click the tab key to add additional rows.</td></tr> </table> |                      |                 |                 |  |  | Click the tab key to add additional rows. |
|                                                    |                                                                                                                                                                                |                                                                                                                                                                                                                                                                                                                                                                                                                             |                      |                 |                 |  |  |                                           |
|                                                    |                                                                                                                                                                                |                                                                                                                                                                                                                                                                                                                                                                                                                             |                      |                 |                 |  |  |                                           |
|                                                    | Click the tab key to add additional rows.                                                                                                                                      |                                                                                                                                                                                                                                                                                                                                                                                                                             |                      |                 |                 |  |  |                                           |
| Time frame: past 36 months                         |                                                                                                                                                                                |                                                                                                                                                                                                                                                                                                                                                                                                                             |                      |                 |                 |  |  |                                           |
| <b>2</b>                                           | Grants or contracts from any entity (if not indicated in item #1 above).                                                                                                       | <input type="checkbox"/> <b>None</b><br><table border="1" style="width: 100%; border-collapse: collapse; margin-top: 5px;"> <tr><td style="width: 60%; height: 20px;">Assembly Biosciences</td><td style="width: 40%;">Research grants</td></tr> <tr><td style="height: 20px;">GlaxoSmithKline</td><td></td></tr> <tr><td style="height: 20px;"></td><td></td></tr> </table>                                                | Assembly Biosciences | Research grants | GlaxoSmithKline |  |  |                                           |
| Assembly Biosciences                               | Research grants                                                                                                                                                                |                                                                                                                                                                                                                                                                                                                                                                                                                             |                      |                 |                 |  |  |                                           |
| GlaxoSmithKline                                    |                                                                                                                                                                                |                                                                                                                                                                                                                                                                                                                                                                                                                             |                      |                 |                 |  |  |                                           |
|                                                    |                                                                                                                                                                                |                                                                                                                                                                                                                                                                                                                                                                                                                             |                      |                 |                 |  |  |                                           |

|                 |                                                                                                              | Name all entities with whom you have this relationship or indicate none (add rows as needed)                                                                                                                                                                                                                            | Specifications/Comments (e.g., if payments were made to you or to your institution) |            |  |  |  |  |  |
|-----------------|--------------------------------------------------------------------------------------------------------------|-------------------------------------------------------------------------------------------------------------------------------------------------------------------------------------------------------------------------------------------------------------------------------------------------------------------------|-------------------------------------------------------------------------------------|------------|--|--|--|--|--|
| 3               | Royalties or licenses                                                                                        | <input checked="" type="checkbox"/> <b>None</b><br><table border="1" style="width: 100%; border-collapse: collapse;"> <tr><td style="width: 50%; height: 20px;"></td><td style="width: 50%;"></td></tr> <tr><td style="height: 20px;"></td><td></td></tr> <tr><td style="height: 20px;"></td><td></td></tr> </table>    |                                                                                     |            |  |  |  |  |  |
|                 |                                                                                                              |                                                                                                                                                                                                                                                                                                                         |                                                                                     |            |  |  |  |  |  |
|                 |                                                                                                              |                                                                                                                                                                                                                                                                                                                         |                                                                                     |            |  |  |  |  |  |
|                 |                                                                                                              |                                                                                                                                                                                                                                                                                                                         |                                                                                     |            |  |  |  |  |  |
| 4               | Consulting fees                                                                                              | <input type="checkbox"/> <b>None</b><br><table border="1" style="width: 100%; border-collapse: collapse;"> <tr> <td style="width: 50%;">Gilead Sciences</td> <td style="width: 50%;">Consulting</td> </tr> <tr><td style="height: 20px;"></td><td></td></tr> <tr><td style="height: 20px;"></td><td></td></tr> </table> | Gilead Sciences                                                                     | Consulting |  |  |  |  |  |
| Gilead Sciences | Consulting                                                                                                   |                                                                                                                                                                                                                                                                                                                         |                                                                                     |            |  |  |  |  |  |
|                 |                                                                                                              |                                                                                                                                                                                                                                                                                                                         |                                                                                     |            |  |  |  |  |  |
|                 |                                                                                                              |                                                                                                                                                                                                                                                                                                                         |                                                                                     |            |  |  |  |  |  |
| 5               | Payment or honoraria for lectures, presentations, speakers bureaus, manuscript writing or educational events | <input checked="" type="checkbox"/> <b>None</b><br><table border="1" style="width: 100%; border-collapse: collapse;"> <tr><td style="width: 50%; height: 20px;"></td><td style="width: 50%;"></td></tr> <tr><td style="height: 20px;"></td><td></td></tr> <tr><td style="height: 20px;"></td><td></td></tr> </table>    |                                                                                     |            |  |  |  |  |  |
|                 |                                                                                                              |                                                                                                                                                                                                                                                                                                                         |                                                                                     |            |  |  |  |  |  |
|                 |                                                                                                              |                                                                                                                                                                                                                                                                                                                         |                                                                                     |            |  |  |  |  |  |
|                 |                                                                                                              |                                                                                                                                                                                                                                                                                                                         |                                                                                     |            |  |  |  |  |  |
| 6               | Payment for expert testimony                                                                                 | <input checked="" type="checkbox"/> <b>None</b><br><table border="1" style="width: 100%; border-collapse: collapse;"> <tr><td style="width: 50%; height: 20px;"></td><td style="width: 50%;"></td></tr> <tr><td style="height: 20px;"></td><td></td></tr> <tr><td style="height: 20px;"></td><td></td></tr> </table>    |                                                                                     |            |  |  |  |  |  |
|                 |                                                                                                              |                                                                                                                                                                                                                                                                                                                         |                                                                                     |            |  |  |  |  |  |
|                 |                                                                                                              |                                                                                                                                                                                                                                                                                                                         |                                                                                     |            |  |  |  |  |  |
|                 |                                                                                                              |                                                                                                                                                                                                                                                                                                                         |                                                                                     |            |  |  |  |  |  |
| 7               | Support for attending meetings and/or travel                                                                 | <input checked="" type="checkbox"/> <b>None</b><br><table border="1" style="width: 100%; border-collapse: collapse;"> <tr><td style="width: 50%; height: 20px;"></td><td style="width: 50%;"></td></tr> <tr><td style="height: 20px;"></td><td></td></tr> <tr><td style="height: 20px;"></td><td></td></tr> </table>    |                                                                                     |            |  |  |  |  |  |
|                 |                                                                                                              |                                                                                                                                                                                                                                                                                                                         |                                                                                     |            |  |  |  |  |  |
|                 |                                                                                                              |                                                                                                                                                                                                                                                                                                                         |                                                                                     |            |  |  |  |  |  |
|                 |                                                                                                              |                                                                                                                                                                                                                                                                                                                         |                                                                                     |            |  |  |  |  |  |
| 8               | Patents planned, issued or pending                                                                           | <input checked="" type="checkbox"/> <b>None</b><br><table border="1" style="width: 100%; border-collapse: collapse;"> <tr><td style="width: 50%; height: 20px;"></td><td style="width: 50%;"></td></tr> <tr><td style="height: 20px;"></td><td></td></tr> <tr><td style="height: 20px;"></td><td></td></tr> </table>    |                                                                                     |            |  |  |  |  |  |
|                 |                                                                                                              |                                                                                                                                                                                                                                                                                                                         |                                                                                     |            |  |  |  |  |  |
|                 |                                                                                                              |                                                                                                                                                                                                                                                                                                                         |                                                                                     |            |  |  |  |  |  |
|                 |                                                                                                              |                                                                                                                                                                                                                                                                                                                         |                                                                                     |            |  |  |  |  |  |
| 9               | Participation on a Data Safety Monitoring Board or Advisory Board                                            | <input checked="" type="checkbox"/> <b>None</b><br><table border="1" style="width: 100%; border-collapse: collapse;"> <tr><td style="width: 50%; height: 20px;"></td><td style="width: 50%;"></td></tr> <tr><td style="height: 20px;"></td><td></td></tr> <tr><td style="height: 20px;"></td><td></td></tr> </table>    |                                                                                     |            |  |  |  |  |  |
|                 |                                                                                                              |                                                                                                                                                                                                                                                                                                                         |                                                                                     |            |  |  |  |  |  |
|                 |                                                                                                              |                                                                                                                                                                                                                                                                                                                         |                                                                                     |            |  |  |  |  |  |
|                 |                                                                                                              |                                                                                                                                                                                                                                                                                                                         |                                                                                     |            |  |  |  |  |  |
| 10              | Leadership or fiduciary role in other board,                                                                 | <input checked="" type="checkbox"/> <b>None</b><br><table border="1" style="width: 100%; border-collapse: collapse;"> <tr><td style="width: 50%; height: 20px;"></td><td style="width: 50%;"></td></tr> </table>                                                                                                        |                                                                                     |            |  |  |  |  |  |
|                 |                                                                                                              |                                                                                                                                                                                                                                                                                                                         |                                                                                     |            |  |  |  |  |  |

|           |                                                                                  | Name all entities with whom you have this relationship or indicate none (add rows as needed) | Specifications/Comments (e.g., if payments were made to you or to your institution) |
|-----------|----------------------------------------------------------------------------------|----------------------------------------------------------------------------------------------|-------------------------------------------------------------------------------------|
|           | society, committee or advocacy group, paid or unpaid                             |                                                                                              |                                                                                     |
| <b>11</b> | Stock or stock options                                                           | <input checked="" type="checkbox"/> <b>None</b>                                              |                                                                                     |
|           |                                                                                  |                                                                                              |                                                                                     |
|           |                                                                                  |                                                                                              |                                                                                     |
| <b>12</b> | Receipt of equipment, materials, drugs, medical writing, gifts or other services | <input checked="" type="checkbox"/> <b>None</b>                                              |                                                                                     |
|           |                                                                                  |                                                                                              |                                                                                     |
|           |                                                                                  |                                                                                              |                                                                                     |
| <b>13</b> | Other financial or non-financial interests                                       | <input checked="" type="checkbox"/> <b>None</b>                                              |                                                                                     |
|           |                                                                                  |                                                                                              |                                                                                     |
|           |                                                                                  |                                                                                              |                                                                                     |

Please place an "X" next to the following statement to indicate your agreement:

I certify that I have answered every question and have not altered the wording of any of the questions on this form.

## ICMJE DISCLOSURE FORM

**Date:** 8/7/2023

**Your Name:** Ira M Jacobson

**Manuscript Title:** Safety and off-treatment response of patients with chronic hepatitis B virus infection receiving long-term open-label vebicorvir

**Manuscript Number (if known):** [Click or tap here to enter text.](#)

In the interest of transparency, we ask you to disclose all relationships/activities/interests listed below that are related to the content of your manuscript. "Related" means any relation with for-profit or not-for-profit third parties whose interests may be affected by the content of the manuscript. Disclosure represents a commitment to transparency and does not necessarily indicate a bias. If you are in doubt about whether to list a relationship/activity/interest, it is preferable that you do so.

In the interest of transparency, we ask you to disclose all relationships/activities/interests listed below that are related to the content of your manuscript. "Related" means any relation with for-profit or not-for-profit third parties whose interests may be affected by the content of the manuscript. Disclosure represents a commitment to transparency and does not necessarily indicate a bias. If you are in doubt about whether to list a relationship/activity/interest, it is preferable that you do so.

The author's relationships/activities/interests should be defined broadly. For example, if your manuscript pertains to the epidemiology of hypertension, you should declare all relationships with manufacturers of antihypertensive medication, even if that medication is not mentioned in the manuscript.

In item #1 below, report all support for the work reported in this manuscript without time limit. For all other items, the time frame for disclosure is the past 36 months.

|                                                    | Name all entities with whom you have this relationship or indicate none (add rows as needed)                                                                                   | Specifications/Comments (e.g., if payments were made to you or to your institution)                                                                                                                                                                                                                                                                                                                                                                                                                                          |                      |                                               |                      |         |           |                        |        |                 |           |
|----------------------------------------------------|--------------------------------------------------------------------------------------------------------------------------------------------------------------------------------|------------------------------------------------------------------------------------------------------------------------------------------------------------------------------------------------------------------------------------------------------------------------------------------------------------------------------------------------------------------------------------------------------------------------------------------------------------------------------------------------------------------------------|----------------------|-----------------------------------------------|----------------------|---------|-----------|------------------------|--------|-----------------|-----------|
| Time frame: Since the initial planning of the work |                                                                                                                                                                                |                                                                                                                                                                                                                                                                                                                                                                                                                                                                                                                              |                      |                                               |                      |         |           |                        |        |                 |           |
| <b>1</b>                                           | All support for the present manuscript (e.g., funding, provision of study materials, medical writing, article processing charges, etc.)<br><b>No time limit for this item.</b> | <input checked="" type="checkbox"/> <b>None</b><br><table border="1" style="width: 100%; border-collapse: collapse; margin-top: 5px;"> <tr><td style="height: 15px;"> </td><td style="width: 100px;"> </td></tr> <tr><td style="height: 15px;"> </td><td> </td></tr> <tr><td style="height: 15px;"> </td><td> </td></tr> </table> <p style="font-size: small; color: gray; margin-top: 5px;">Click the tab key to add additional rows.</p>                                                                                   |                      |                                               |                      |         |           |                        |        |                 |           |
|                                                    |                                                                                                                                                                                |                                                                                                                                                                                                                                                                                                                                                                                                                                                                                                                              |                      |                                               |                      |         |           |                        |        |                 |           |
|                                                    |                                                                                                                                                                                |                                                                                                                                                                                                                                                                                                                                                                                                                                                                                                                              |                      |                                               |                      |         |           |                        |        |                 |           |
|                                                    |                                                                                                                                                                                |                                                                                                                                                                                                                                                                                                                                                                                                                                                                                                                              |                      |                                               |                      |         |           |                        |        |                 |           |
| Time frame: past 36 months                         |                                                                                                                                                                                |                                                                                                                                                                                                                                                                                                                                                                                                                                                                                                                              |                      |                                               |                      |         |           |                        |        |                 |           |
| <b>2</b>                                           | Grants or contracts from any entity (if not indicated in item #1 above).                                                                                                       | <input type="checkbox"/> <b>None</b><br><table border="1" style="width: 100%; border-collapse: collapse; margin-top: 5px;"> <tr><td style="width: 70%;">Assembly Biosciences</td><td rowspan="7" style="vertical-align: top;">Conducted research for<br/>Paid to institution</td></tr> <tr><td>Bristol-Myers Squibb</td></tr> <tr><td>Cymabay</td></tr> <tr><td>Eli Lilly</td></tr> <tr><td>Enanta Pharmaceuticals</td></tr> <tr><td>Genfit</td></tr> <tr><td>Gilead Sciences</td></tr> <tr><td>Intercept</td></tr> </table> | Assembly Biosciences | Conducted research for<br>Paid to institution | Bristol-Myers Squibb | Cymabay | Eli Lilly | Enanta Pharmaceuticals | Genfit | Gilead Sciences | Intercept |
| Assembly Biosciences                               | Conducted research for<br>Paid to institution                                                                                                                                  |                                                                                                                                                                                                                                                                                                                                                                                                                                                                                                                              |                      |                                               |                      |         |           |                        |        |                 |           |
| Bristol-Myers Squibb                               |                                                                                                                                                                                |                                                                                                                                                                                                                                                                                                                                                                                                                                                                                                                              |                      |                                               |                      |         |           |                        |        |                 |           |
| Cymabay                                            |                                                                                                                                                                                |                                                                                                                                                                                                                                                                                                                                                                                                                                                                                                                              |                      |                                               |                      |         |           |                        |        |                 |           |
| Eli Lilly                                          |                                                                                                                                                                                |                                                                                                                                                                                                                                                                                                                                                                                                                                                                                                                              |                      |                                               |                      |         |           |                        |        |                 |           |
| Enanta Pharmaceuticals                             |                                                                                                                                                                                |                                                                                                                                                                                                                                                                                                                                                                                                                                                                                                                              |                      |                                               |                      |         |           |                        |        |                 |           |
| Genfit                                             |                                                                                                                                                                                |                                                                                                                                                                                                                                                                                                                                                                                                                                                                                                                              |                      |                                               |                      |         |           |                        |        |                 |           |
| Gilead Sciences                                    |                                                                                                                                                                                |                                                                                                                                                                                                                                                                                                                                                                                                                                                                                                                              |                      |                                               |                      |         |           |                        |        |                 |           |
| Intercept                                          |                                                                                                                                                                                |                                                                                                                                                                                                                                                                                                                                                                                                                                                                                                                              |                      |                                               |                      |         |           |                        |        |                 |           |

|                                  |                                                                                                              | Name all entities with whom you have this relationship or indicate none (add rows as needed)                                                                                                                                                                                                            | Specifications/Comments (e.g., if payments were made to you or to your institution) |                     |                   |                        |           |         |       |  |  |  |            |
|----------------------------------|--------------------------------------------------------------------------------------------------------------|---------------------------------------------------------------------------------------------------------------------------------------------------------------------------------------------------------------------------------------------------------------------------------------------------------|-------------------------------------------------------------------------------------|---------------------|-------------------|------------------------|-----------|---------|-------|--|--|--|------------|
|                                  |                                                                                                              | <table border="1"> <tr><td>Janssen</td></tr> <tr><td>Merck</td></tr> <tr><td>Novo Nordisk</td></tr> </table>                                                                                                                                                                                            | Janssen                                                                             | Merck               | Novo Nordisk      |                        |           |         |       |  |  |  |            |
| Janssen                          |                                                                                                              |                                                                                                                                                                                                                                                                                                         |                                                                                     |                     |                   |                        |           |         |       |  |  |  |            |
| Merck                            |                                                                                                              |                                                                                                                                                                                                                                                                                                         |                                                                                     |                     |                   |                        |           |         |       |  |  |  |            |
| Novo Nordisk                     |                                                                                                              |                                                                                                                                                                                                                                                                                                         |                                                                                     |                     |                   |                        |           |         |       |  |  |  |            |
| <b>3</b>                         | Royalties or licenses                                                                                        | <input checked="" type="checkbox"/> <b>None</b>                                                                                                                                                                                                                                                         |                                                                                     |                     |                   |                        |           |         |       |  |  |  |            |
|                                  |                                                                                                              | <table border="1"> <tr><td></td></tr> <tr><td></td></tr> <tr><td></td></tr> </table>                                                                                                                                                                                                                    |                                                                                     |                     |                   |                        |           |         |       |  |  |  |            |
|                                  |                                                                                                              |                                                                                                                                                                                                                                                                                                         |                                                                                     |                     |                   |                        |           |         |       |  |  |  |            |
|                                  |                                                                                                              |                                                                                                                                                                                                                                                                                                         |                                                                                     |                     |                   |                        |           |         |       |  |  |  |            |
|                                  |                                                                                                              |                                                                                                                                                                                                                                                                                                         |                                                                                     |                     |                   |                        |           |         |       |  |  |  |            |
| <b>4</b>                         | Consulting fees                                                                                              | <input type="checkbox"/> <b>None</b>                                                                                                                                                                                                                                                                    |                                                                                     |                     |                   |                        |           |         |       |  |  |  |            |
|                                  |                                                                                                              | <table border="1"> <tr><td>AbbVie</td></tr> <tr><td>Aligos Therapeutics</td></tr> <tr><td>Arbutus Biopharma</td></tr> <tr><td>Gilead Sciences</td></tr> <tr><td>Intercept</td></tr> <tr><td>Janssen</td></tr> <tr><td>Roche</td></tr> <tr><td></td></tr> <tr><td></td></tr> <tr><td></td></tr> </table> | AbbVie                                                                              | Aligos Therapeutics | Arbutus Biopharma | Gilead Sciences        | Intercept | Janssen | Roche |  |  |  | Consultant |
| AbbVie                           |                                                                                                              |                                                                                                                                                                                                                                                                                                         |                                                                                     |                     |                   |                        |           |         |       |  |  |  |            |
| Aligos Therapeutics              |                                                                                                              |                                                                                                                                                                                                                                                                                                         |                                                                                     |                     |                   |                        |           |         |       |  |  |  |            |
| Arbutus Biopharma                |                                                                                                              |                                                                                                                                                                                                                                                                                                         |                                                                                     |                     |                   |                        |           |         |       |  |  |  |            |
| Gilead Sciences                  |                                                                                                              |                                                                                                                                                                                                                                                                                                         |                                                                                     |                     |                   |                        |           |         |       |  |  |  |            |
| Intercept                        |                                                                                                              |                                                                                                                                                                                                                                                                                                         |                                                                                     |                     |                   |                        |           |         |       |  |  |  |            |
| Janssen                          |                                                                                                              |                                                                                                                                                                                                                                                                                                         |                                                                                     |                     |                   |                        |           |         |       |  |  |  |            |
| Roche                            |                                                                                                              |                                                                                                                                                                                                                                                                                                         |                                                                                     |                     |                   |                        |           |         |       |  |  |  |            |
|                                  |                                                                                                              |                                                                                                                                                                                                                                                                                                         |                                                                                     |                     |                   |                        |           |         |       |  |  |  |            |
|                                  |                                                                                                              |                                                                                                                                                                                                                                                                                                         |                                                                                     |                     |                   |                        |           |         |       |  |  |  |            |
|                                  |                                                                                                              |                                                                                                                                                                                                                                                                                                         |                                                                                     |                     |                   |                        |           |         |       |  |  |  |            |
| <b>5</b>                         | Payment or honoraria for lectures, presentations, speakers bureaus, manuscript writing or educational events | <input type="checkbox"/> <b>None</b>                                                                                                                                                                                                                                                                    |                                                                                     |                     |                   |                        |           |         |       |  |  |  |            |
|                                  |                                                                                                              | <table border="1"> <tr><td>Chronic Liver Disease Foundation</td></tr> <tr><td></td></tr> <tr><td></td></tr> </table>                                                                                                                                                                                    | Chronic Liver Disease Foundation                                                    |                     |                   | Manuscript preparation |           |         |       |  |  |  |            |
| Chronic Liver Disease Foundation |                                                                                                              |                                                                                                                                                                                                                                                                                                         |                                                                                     |                     |                   |                        |           |         |       |  |  |  |            |
|                                  |                                                                                                              |                                                                                                                                                                                                                                                                                                         |                                                                                     |                     |                   |                        |           |         |       |  |  |  |            |
|                                  |                                                                                                              |                                                                                                                                                                                                                                                                                                         |                                                                                     |                     |                   |                        |           |         |       |  |  |  |            |
| <b>6</b>                         | Payment for expert testimony                                                                                 | <input checked="" type="checkbox"/> <b>None</b>                                                                                                                                                                                                                                                         |                                                                                     |                     |                   |                        |           |         |       |  |  |  |            |
|                                  |                                                                                                              | <table border="1"> <tr><td></td></tr> <tr><td></td></tr> <tr><td></td></tr> </table>                                                                                                                                                                                                                    |                                                                                     |                     |                   |                        |           |         |       |  |  |  |            |
|                                  |                                                                                                              |                                                                                                                                                                                                                                                                                                         |                                                                                     |                     |                   |                        |           |         |       |  |  |  |            |
|                                  |                                                                                                              |                                                                                                                                                                                                                                                                                                         |                                                                                     |                     |                   |                        |           |         |       |  |  |  |            |
|                                  |                                                                                                              |                                                                                                                                                                                                                                                                                                         |                                                                                     |                     |                   |                        |           |         |       |  |  |  |            |
| <b>7</b>                         | Support for attending meetings and/or travel                                                                 | <input checked="" type="checkbox"/> <b>None</b>                                                                                                                                                                                                                                                         |                                                                                     |                     |                   |                        |           |         |       |  |  |  |            |
|                                  |                                                                                                              | <table border="1"> <tr><td></td></tr> <tr><td></td></tr> <tr><td></td></tr> </table>                                                                                                                                                                                                                    |                                                                                     |                     |                   |                        |           |         |       |  |  |  |            |
|                                  |                                                                                                              |                                                                                                                                                                                                                                                                                                         |                                                                                     |                     |                   |                        |           |         |       |  |  |  |            |
|                                  |                                                                                                              |                                                                                                                                                                                                                                                                                                         |                                                                                     |                     |                   |                        |           |         |       |  |  |  |            |
|                                  |                                                                                                              |                                                                                                                                                                                                                                                                                                         |                                                                                     |                     |                   |                        |           |         |       |  |  |  |            |

|                   |                                                                                                   | Name all entities with whom you have this relationship or indicate none (add rows as needed)                                                                                                                                                                                                                                                                                                                                                                                                                                                                                                                                                                                                                                                                                                                                                                                                                                                                              | Specifications/Comments (e.g., if payments were made to you or to your institution) |                                   |        |                                   |           |                           |                   |                                   |           |                           |        |                           |                 |                                   |                 |                           |           |                                   |         |                                   |       |                                   |        |                           |  |
|-------------------|---------------------------------------------------------------------------------------------------|---------------------------------------------------------------------------------------------------------------------------------------------------------------------------------------------------------------------------------------------------------------------------------------------------------------------------------------------------------------------------------------------------------------------------------------------------------------------------------------------------------------------------------------------------------------------------------------------------------------------------------------------------------------------------------------------------------------------------------------------------------------------------------------------------------------------------------------------------------------------------------------------------------------------------------------------------------------------------|-------------------------------------------------------------------------------------|-----------------------------------|--------|-----------------------------------|-----------|---------------------------|-------------------|-----------------------------------|-----------|---------------------------|--------|---------------------------|-----------------|-----------------------------------|-----------------|---------------------------|-----------|-----------------------------------|---------|-----------------------------------|-------|-----------------------------------|--------|---------------------------|--|
| 8                 | Patents planned, issued or pending                                                                | <input checked="" type="checkbox"/> <b>None</b><br><table border="1" style="width: 100%; border-collapse: collapse;"> <tr><td style="width: 50%; height: 20px;"></td><td style="width: 50%;"></td></tr> <tr><td style="height: 20px;"></td><td></td></tr> <tr><td style="height: 20px;"></td><td></td></tr> </table>                                                                                                                                                                                                                                                                                                                                                                                                                                                                                                                                                                                                                                                      |                                                                                     |                                   |        |                                   |           |                           |                   |                                   |           |                           |        |                           |                 |                                   |                 |                           |           |                                   |         |                                   |       |                                   |        |                           |  |
|                   |                                                                                                   |                                                                                                                                                                                                                                                                                                                                                                                                                                                                                                                                                                                                                                                                                                                                                                                                                                                                                                                                                                           |                                                                                     |                                   |        |                                   |           |                           |                   |                                   |           |                           |        |                           |                 |                                   |                 |                           |           |                                   |         |                                   |       |                                   |        |                           |  |
|                   |                                                                                                   |                                                                                                                                                                                                                                                                                                                                                                                                                                                                                                                                                                                                                                                                                                                                                                                                                                                                                                                                                                           |                                                                                     |                                   |        |                                   |           |                           |                   |                                   |           |                           |        |                           |                 |                                   |                 |                           |           |                                   |         |                                   |       |                                   |        |                           |  |
|                   |                                                                                                   |                                                                                                                                                                                                                                                                                                                                                                                                                                                                                                                                                                                                                                                                                                                                                                                                                                                                                                                                                                           |                                                                                     |                                   |        |                                   |           |                           |                   |                                   |           |                           |        |                           |                 |                                   |                 |                           |           |                                   |         |                                   |       |                                   |        |                           |  |
| 9                 | Participation on a Data Safety Monitoring Board or Advisory Board                                 | <input type="checkbox"/> <b>None</b><br><table border="1" style="width: 100%; border-collapse: collapse;"> <tr><td style="width: 50%;">Abbvie</td><td>Participated in advisory board(s)</td></tr> <tr><td>Aligos</td><td>Participated in advisory board(s)</td></tr> <tr><td>Altimmune</td><td>Data monitoring committee</td></tr> <tr><td>Arbutus Biopharma</td><td>Participated in advisory board(s)</td></tr> <tr><td>Arrowhead</td><td>Data monitoring committee</td></tr> <tr><td>Galmed</td><td>Data monitoring committee</td></tr> <tr><td>Gilead Sciences</td><td>Participated in advisory board(s)</td></tr> <tr><td>GlaxoSmithKline</td><td>Data monitoring committee</td></tr> <tr><td>Intercept</td><td>Participated in advisory board(s)</td></tr> <tr><td>Janssen</td><td>Participated in advisory board(s)</td></tr> <tr><td>Roche</td><td>Participated in advisory board(s)</td></tr> <tr><td>Takeda</td><td>Data monitoring committee</td></tr> </table> | Abbvie                                                                              | Participated in advisory board(s) | Aligos | Participated in advisory board(s) | Altimmune | Data monitoring committee | Arbutus Biopharma | Participated in advisory board(s) | Arrowhead | Data monitoring committee | Galmed | Data monitoring committee | Gilead Sciences | Participated in advisory board(s) | GlaxoSmithKline | Data monitoring committee | Intercept | Participated in advisory board(s) | Janssen | Participated in advisory board(s) | Roche | Participated in advisory board(s) | Takeda | Data monitoring committee |  |
| Abbvie            | Participated in advisory board(s)                                                                 |                                                                                                                                                                                                                                                                                                                                                                                                                                                                                                                                                                                                                                                                                                                                                                                                                                                                                                                                                                           |                                                                                     |                                   |        |                                   |           |                           |                   |                                   |           |                           |        |                           |                 |                                   |                 |                           |           |                                   |         |                                   |       |                                   |        |                           |  |
| Aligos            | Participated in advisory board(s)                                                                 |                                                                                                                                                                                                                                                                                                                                                                                                                                                                                                                                                                                                                                                                                                                                                                                                                                                                                                                                                                           |                                                                                     |                                   |        |                                   |           |                           |                   |                                   |           |                           |        |                           |                 |                                   |                 |                           |           |                                   |         |                                   |       |                                   |        |                           |  |
| Altimmune         | Data monitoring committee                                                                         |                                                                                                                                                                                                                                                                                                                                                                                                                                                                                                                                                                                                                                                                                                                                                                                                                                                                                                                                                                           |                                                                                     |                                   |        |                                   |           |                           |                   |                                   |           |                           |        |                           |                 |                                   |                 |                           |           |                                   |         |                                   |       |                                   |        |                           |  |
| Arbutus Biopharma | Participated in advisory board(s)                                                                 |                                                                                                                                                                                                                                                                                                                                                                                                                                                                                                                                                                                                                                                                                                                                                                                                                                                                                                                                                                           |                                                                                     |                                   |        |                                   |           |                           |                   |                                   |           |                           |        |                           |                 |                                   |                 |                           |           |                                   |         |                                   |       |                                   |        |                           |  |
| Arrowhead         | Data monitoring committee                                                                         |                                                                                                                                                                                                                                                                                                                                                                                                                                                                                                                                                                                                                                                                                                                                                                                                                                                                                                                                                                           |                                                                                     |                                   |        |                                   |           |                           |                   |                                   |           |                           |        |                           |                 |                                   |                 |                           |           |                                   |         |                                   |       |                                   |        |                           |  |
| Galmed            | Data monitoring committee                                                                         |                                                                                                                                                                                                                                                                                                                                                                                                                                                                                                                                                                                                                                                                                                                                                                                                                                                                                                                                                                           |                                                                                     |                                   |        |                                   |           |                           |                   |                                   |           |                           |        |                           |                 |                                   |                 |                           |           |                                   |         |                                   |       |                                   |        |                           |  |
| Gilead Sciences   | Participated in advisory board(s)                                                                 |                                                                                                                                                                                                                                                                                                                                                                                                                                                                                                                                                                                                                                                                                                                                                                                                                                                                                                                                                                           |                                                                                     |                                   |        |                                   |           |                           |                   |                                   |           |                           |        |                           |                 |                                   |                 |                           |           |                                   |         |                                   |       |                                   |        |                           |  |
| GlaxoSmithKline   | Data monitoring committee                                                                         |                                                                                                                                                                                                                                                                                                                                                                                                                                                                                                                                                                                                                                                                                                                                                                                                                                                                                                                                                                           |                                                                                     |                                   |        |                                   |           |                           |                   |                                   |           |                           |        |                           |                 |                                   |                 |                           |           |                                   |         |                                   |       |                                   |        |                           |  |
| Intercept         | Participated in advisory board(s)                                                                 |                                                                                                                                                                                                                                                                                                                                                                                                                                                                                                                                                                                                                                                                                                                                                                                                                                                                                                                                                                           |                                                                                     |                                   |        |                                   |           |                           |                   |                                   |           |                           |        |                           |                 |                                   |                 |                           |           |                                   |         |                                   |       |                                   |        |                           |  |
| Janssen           | Participated in advisory board(s)                                                                 |                                                                                                                                                                                                                                                                                                                                                                                                                                                                                                                                                                                                                                                                                                                                                                                                                                                                                                                                                                           |                                                                                     |                                   |        |                                   |           |                           |                   |                                   |           |                           |        |                           |                 |                                   |                 |                           |           |                                   |         |                                   |       |                                   |        |                           |  |
| Roche             | Participated in advisory board(s)                                                                 |                                                                                                                                                                                                                                                                                                                                                                                                                                                                                                                                                                                                                                                                                                                                                                                                                                                                                                                                                                           |                                                                                     |                                   |        |                                   |           |                           |                   |                                   |           |                           |        |                           |                 |                                   |                 |                           |           |                                   |         |                                   |       |                                   |        |                           |  |
| Takeda            | Data monitoring committee                                                                         |                                                                                                                                                                                                                                                                                                                                                                                                                                                                                                                                                                                                                                                                                                                                                                                                                                                                                                                                                                           |                                                                                     |                                   |        |                                   |           |                           |                   |                                   |           |                           |        |                           |                 |                                   |                 |                           |           |                                   |         |                                   |       |                                   |        |                           |  |
| 10                | Leadership or fiduciary role in other board, society, committee or advocacy group, paid or unpaid | <input checked="" type="checkbox"/> <b>None</b><br><table border="1" style="width: 100%; border-collapse: collapse;"> <tr><td style="width: 50%; height: 20px;"></td><td style="width: 50%;"></td></tr> <tr><td style="height: 20px;"></td><td></td></tr> <tr><td style="height: 20px;"></td><td></td></tr> </table>                                                                                                                                                                                                                                                                                                                                                                                                                                                                                                                                                                                                                                                      |                                                                                     |                                   |        |                                   |           |                           |                   |                                   |           |                           |        |                           |                 |                                   |                 |                           |           |                                   |         |                                   |       |                                   |        |                           |  |
|                   |                                                                                                   |                                                                                                                                                                                                                                                                                                                                                                                                                                                                                                                                                                                                                                                                                                                                                                                                                                                                                                                                                                           |                                                                                     |                                   |        |                                   |           |                           |                   |                                   |           |                           |        |                           |                 |                                   |                 |                           |           |                                   |         |                                   |       |                                   |        |                           |  |
|                   |                                                                                                   |                                                                                                                                                                                                                                                                                                                                                                                                                                                                                                                                                                                                                                                                                                                                                                                                                                                                                                                                                                           |                                                                                     |                                   |        |                                   |           |                           |                   |                                   |           |                           |        |                           |                 |                                   |                 |                           |           |                                   |         |                                   |       |                                   |        |                           |  |
|                   |                                                                                                   |                                                                                                                                                                                                                                                                                                                                                                                                                                                                                                                                                                                                                                                                                                                                                                                                                                                                                                                                                                           |                                                                                     |                                   |        |                                   |           |                           |                   |                                   |           |                           |        |                           |                 |                                   |                 |                           |           |                                   |         |                                   |       |                                   |        |                           |  |
| 11                | Stock or stock options                                                                            | <input checked="" type="checkbox"/> <b>None</b><br><table border="1" style="width: 100%; border-collapse: collapse;"> <tr><td style="width: 50%; height: 20px;"></td><td style="width: 50%;"></td></tr> <tr><td style="height: 20px;"></td><td></td></tr> <tr><td style="height: 20px;"></td><td></td></tr> </table>                                                                                                                                                                                                                                                                                                                                                                                                                                                                                                                                                                                                                                                      |                                                                                     |                                   |        |                                   |           |                           |                   |                                   |           |                           |        |                           |                 |                                   |                 |                           |           |                                   |         |                                   |       |                                   |        |                           |  |
|                   |                                                                                                   |                                                                                                                                                                                                                                                                                                                                                                                                                                                                                                                                                                                                                                                                                                                                                                                                                                                                                                                                                                           |                                                                                     |                                   |        |                                   |           |                           |                   |                                   |           |                           |        |                           |                 |                                   |                 |                           |           |                                   |         |                                   |       |                                   |        |                           |  |
|                   |                                                                                                   |                                                                                                                                                                                                                                                                                                                                                                                                                                                                                                                                                                                                                                                                                                                                                                                                                                                                                                                                                                           |                                                                                     |                                   |        |                                   |           |                           |                   |                                   |           |                           |        |                           |                 |                                   |                 |                           |           |                                   |         |                                   |       |                                   |        |                           |  |
|                   |                                                                                                   |                                                                                                                                                                                                                                                                                                                                                                                                                                                                                                                                                                                                                                                                                                                                                                                                                                                                                                                                                                           |                                                                                     |                                   |        |                                   |           |                           |                   |                                   |           |                           |        |                           |                 |                                   |                 |                           |           |                                   |         |                                   |       |                                   |        |                           |  |
| 12                | Receipt of equipment, materials, drugs, medical writing, gifts or other services                  | <input checked="" type="checkbox"/> <b>None</b><br><table border="1" style="width: 100%; border-collapse: collapse;"> <tr><td style="width: 50%; height: 20px;"></td><td style="width: 50%;"></td></tr> <tr><td style="height: 20px;"></td><td></td></tr> <tr><td style="height: 20px;"></td><td></td></tr> </table>                                                                                                                                                                                                                                                                                                                                                                                                                                                                                                                                                                                                                                                      |                                                                                     |                                   |        |                                   |           |                           |                   |                                   |           |                           |        |                           |                 |                                   |                 |                           |           |                                   |         |                                   |       |                                   |        |                           |  |
|                   |                                                                                                   |                                                                                                                                                                                                                                                                                                                                                                                                                                                                                                                                                                                                                                                                                                                                                                                                                                                                                                                                                                           |                                                                                     |                                   |        |                                   |           |                           |                   |                                   |           |                           |        |                           |                 |                                   |                 |                           |           |                                   |         |                                   |       |                                   |        |                           |  |
|                   |                                                                                                   |                                                                                                                                                                                                                                                                                                                                                                                                                                                                                                                                                                                                                                                                                                                                                                                                                                                                                                                                                                           |                                                                                     |                                   |        |                                   |           |                           |                   |                                   |           |                           |        |                           |                 |                                   |                 |                           |           |                                   |         |                                   |       |                                   |        |                           |  |
|                   |                                                                                                   |                                                                                                                                                                                                                                                                                                                                                                                                                                                                                                                                                                                                                                                                                                                                                                                                                                                                                                                                                                           |                                                                                     |                                   |        |                                   |           |                           |                   |                                   |           |                           |        |                           |                 |                                   |                 |                           |           |                                   |         |                                   |       |                                   |        |                           |  |
| 13                | Other financial or non-financial interests                                                        | <input checked="" type="checkbox"/> <b>None</b><br><table border="1" style="width: 100%; border-collapse: collapse;"> <tr><td style="width: 50%; height: 20px;"></td><td style="width: 50%;"></td></tr> <tr><td style="height: 20px;"></td><td></td></tr> <tr><td style="height: 20px;"></td><td></td></tr> </table>                                                                                                                                                                                                                                                                                                                                                                                                                                                                                                                                                                                                                                                      |                                                                                     |                                   |        |                                   |           |                           |                   |                                   |           |                           |        |                           |                 |                                   |                 |                           |           |                                   |         |                                   |       |                                   |        |                           |  |
|                   |                                                                                                   |                                                                                                                                                                                                                                                                                                                                                                                                                                                                                                                                                                                                                                                                                                                                                                                                                                                                                                                                                                           |                                                                                     |                                   |        |                                   |           |                           |                   |                                   |           |                           |        |                           |                 |                                   |                 |                           |           |                                   |         |                                   |       |                                   |        |                           |  |
|                   |                                                                                                   |                                                                                                                                                                                                                                                                                                                                                                                                                                                                                                                                                                                                                                                                                                                                                                                                                                                                                                                                                                           |                                                                                     |                                   |        |                                   |           |                           |                   |                                   |           |                           |        |                           |                 |                                   |                 |                           |           |                                   |         |                                   |       |                                   |        |                           |  |
|                   |                                                                                                   |                                                                                                                                                                                                                                                                                                                                                                                                                                                                                                                                                                                                                                                                                                                                                                                                                                                                                                                                                                           |                                                                                     |                                   |        |                                   |           |                           |                   |                                   |           |                           |        |                           |                 |                                   |                 |                           |           |                                   |         |                                   |       |                                   |        |                           |  |

Please place an "X" next to the following statement to indicate your agreement:

I certify that I have answered every question and have not altered the wording of any of the questions on this form.



## ICMJE DISCLOSURE FORM

**Date:** 8/7/2023

**Your Name:** Walid S Ayoub

**Manuscript Title:** Safety and off-treatment response of patients with chronic hepatitis B virus infection receiving long-term open-label vebicorvir

**Manuscript Number (if known):** [Click or tap here to enter text.](#)

In the interest of transparency, we ask you to disclose all relationships/activities/interests listed below that are related to the content of your manuscript. "Related" means any relation with for-profit or not-for-profit third parties whose interests may be affected by the content of the manuscript. Disclosure represents a commitment to transparency and does not necessarily indicate a bias. If you are in doubt about whether to list a relationship/activity/interest, it is preferable that you do so.

In the interest of transparency, we ask you to disclose all relationships/activities/interests listed below that are related to the content of your manuscript. "Related" means any relation with for-profit or not-for-profit third parties whose interests may be affected by the content of the manuscript. Disclosure represents a commitment to transparency and does not necessarily indicate a bias. If you are in doubt about whether to list a relationship/activity/interest, it is preferable that you do so.

The author's relationships/activities/interests should be defined broadly. For example, if your manuscript pertains to the epidemiology of hypertension, you should declare all relationships with manufacturers of antihypertensive medication, even if that medication is not mentioned in the manuscript.

In item #1 below, report all support for the work reported in this manuscript without time limit. For all other items, the time frame for disclosure is the past 36 months.

|                                                           |                                                                                                                                                                                | Name all entities with whom you have this relationship or indicate none (add rows as needed)                                                                                                                                                                                                                                                                                                                                     | Specifications/Comments (e.g., if payments were made to you or to your institution) |                 |                 |           |       |          |                                           |        |       |  |
|-----------------------------------------------------------|--------------------------------------------------------------------------------------------------------------------------------------------------------------------------------|----------------------------------------------------------------------------------------------------------------------------------------------------------------------------------------------------------------------------------------------------------------------------------------------------------------------------------------------------------------------------------------------------------------------------------|-------------------------------------------------------------------------------------|-----------------|-----------------|-----------|-------|----------|-------------------------------------------|--------|-------|--|
| <b>Time frame: Since the initial planning of the work</b> |                                                                                                                                                                                |                                                                                                                                                                                                                                                                                                                                                                                                                                  |                                                                                     |                 |                 |           |       |          |                                           |        |       |  |
| <b>1</b>                                                  | All support for the present manuscript (e.g., funding, provision of study materials, medical writing, article processing charges, etc.)<br><b>No time limit for this item.</b> | <input checked="" type="checkbox"/> <b>None</b><br><table border="1" style="width: 100%; height: 40px; margin-top: 5px;"> <tr><td style="width: 60%;"></td><td></td></tr> <tr><td></td><td></td></tr> <tr><td></td><td></td></tr> </table>                                                                                                                                                                                       |                                                                                     |                 |                 |           |       |          | Click the tab key to add additional rows. |        |       |  |
|                                                           |                                                                                                                                                                                |                                                                                                                                                                                                                                                                                                                                                                                                                                  |                                                                                     |                 |                 |           |       |          |                                           |        |       |  |
|                                                           |                                                                                                                                                                                |                                                                                                                                                                                                                                                                                                                                                                                                                                  |                                                                                     |                 |                 |           |       |          |                                           |        |       |  |
|                                                           |                                                                                                                                                                                |                                                                                                                                                                                                                                                                                                                                                                                                                                  |                                                                                     |                 |                 |           |       |          |                                           |        |       |  |
| <b>Time frame: past 36 months</b>                         |                                                                                                                                                                                |                                                                                                                                                                                                                                                                                                                                                                                                                                  |                                                                                     |                 |                 |           |       |          |                                           |        |       |  |
| <b>2</b>                                                  | Grants or contracts from any entity (if not indicated in item #1 above).                                                                                                       | <input type="checkbox"/> <b>None</b><br><table border="1" style="width: 100%; height: 100px; margin-top: 5px;"> <tr><td style="width: 60%;">Genfit</td><td rowspan="7" style="vertical-align: top;">Research Grants</td></tr> <tr><td>GlaxoSmithKline</td></tr> <tr><td>Intercept</td></tr> <tr><td>Ipsen</td></tr> <tr><td>Madrigal</td></tr> <tr><td>Mirum</td></tr> <tr><td>Pfizer</td></tr> <tr><td>Zydus</td></tr> </table> | Genfit                                                                              | Research Grants | GlaxoSmithKline | Intercept | Ipsen | Madrigal | Mirum                                     | Pfizer | Zydus |  |
| Genfit                                                    | Research Grants                                                                                                                                                                |                                                                                                                                                                                                                                                                                                                                                                                                                                  |                                                                                     |                 |                 |           |       |          |                                           |        |       |  |
| GlaxoSmithKline                                           |                                                                                                                                                                                |                                                                                                                                                                                                                                                                                                                                                                                                                                  |                                                                                     |                 |                 |           |       |          |                                           |        |       |  |
| Intercept                                                 |                                                                                                                                                                                |                                                                                                                                                                                                                                                                                                                                                                                                                                  |                                                                                     |                 |                 |           |       |          |                                           |        |       |  |
| Ipsen                                                     |                                                                                                                                                                                |                                                                                                                                                                                                                                                                                                                                                                                                                                  |                                                                                     |                 |                 |           |       |          |                                           |        |       |  |
| Madrigal                                                  |                                                                                                                                                                                |                                                                                                                                                                                                                                                                                                                                                                                                                                  |                                                                                     |                 |                 |           |       |          |                                           |        |       |  |
| Mirum                                                     |                                                                                                                                                                                |                                                                                                                                                                                                                                                                                                                                                                                                                                  |                                                                                     |                 |                 |           |       |          |                                           |        |       |  |
| Pfizer                                                    |                                                                                                                                                                                |                                                                                                                                                                                                                                                                                                                                                                                                                                  |                                                                                     |                 |                 |           |       |          |                                           |        |       |  |
| Zydus                                                     |                                                                                                                                                                                |                                                                                                                                                                                                                                                                                                                                                                                                                                  |                                                                                     |                 |                 |           |       |          |                                           |        |       |  |

|                           |                                                                                                              | Name all entities with whom you have this relationship or indicate none (add rows as needed)                                                                                                                                                                                                                                                                                                                                                                                                                               | Specifications/Comments (e.g., if payments were made to you or to your institution) |                                    |                           |  |  |  |  |
|---------------------------|--------------------------------------------------------------------------------------------------------------|----------------------------------------------------------------------------------------------------------------------------------------------------------------------------------------------------------------------------------------------------------------------------------------------------------------------------------------------------------------------------------------------------------------------------------------------------------------------------------------------------------------------------|-------------------------------------------------------------------------------------|------------------------------------|---------------------------|--|--|--|--|
| 3                         | Royalties or licenses                                                                                        | <input checked="" type="checkbox"/> <b>None</b><br><table border="1" style="width: 100%; border-collapse: collapse;"> <tr><td style="width: 50%; height: 15px;"></td><td style="width: 50%;"></td></tr> <tr><td style="height: 15px;"></td><td></td></tr> <tr><td style="height: 15px;"></td><td></td></tr> </table>                                                                                                                                                                                                       |                                                                                     |                                    |                           |  |  |  |  |
|                           |                                                                                                              |                                                                                                                                                                                                                                                                                                                                                                                                                                                                                                                            |                                                                                     |                                    |                           |  |  |  |  |
|                           |                                                                                                              |                                                                                                                                                                                                                                                                                                                                                                                                                                                                                                                            |                                                                                     |                                    |                           |  |  |  |  |
|                           |                                                                                                              |                                                                                                                                                                                                                                                                                                                                                                                                                                                                                                                            |                                                                                     |                                    |                           |  |  |  |  |
| 4                         | Consulting fees                                                                                              | <input checked="" type="checkbox"/> <b>None</b><br><table border="1" style="width: 100%; border-collapse: collapse;"> <tr><td style="width: 50%; height: 15px;"></td><td style="width: 50%;"></td></tr> <tr><td style="height: 15px;"></td><td></td></tr> <tr><td style="height: 15px;"></td><td></td></tr> </table>                                                                                                                                                                                                       |                                                                                     |                                    |                           |  |  |  |  |
|                           |                                                                                                              |                                                                                                                                                                                                                                                                                                                                                                                                                                                                                                                            |                                                                                     |                                    |                           |  |  |  |  |
|                           |                                                                                                              |                                                                                                                                                                                                                                                                                                                                                                                                                                                                                                                            |                                                                                     |                                    |                           |  |  |  |  |
|                           |                                                                                                              |                                                                                                                                                                                                                                                                                                                                                                                                                                                                                                                            |                                                                                     |                                    |                           |  |  |  |  |
| 5                         | Payment or honoraria for lectures, presentations, speakers bureaus, manuscript writing or educational events | <input type="checkbox"/> <b>None</b><br><table border="1" style="width: 100%; border-collapse: collapse;"> <tr> <td style="width: 50%; border-bottom: 1px solid black;">Gilead Sciences</td> <td rowspan="4" style="width: 50%; vertical-align: top;">Being a member of speakers bureau.</td> </tr> <tr> <td style="border-bottom: 1px solid black;">Intercept Pharmaceuticals</td> </tr> <tr><td style="border-bottom: 1px solid black;"> </td></tr> <tr><td style="border-bottom: 1px solid black;"> </td></tr> </table> | Gilead Sciences                                                                     | Being a member of speakers bureau. | Intercept Pharmaceuticals |  |  |  |  |
| Gilead Sciences           | Being a member of speakers bureau.                                                                           |                                                                                                                                                                                                                                                                                                                                                                                                                                                                                                                            |                                                                                     |                                    |                           |  |  |  |  |
| Intercept Pharmaceuticals |                                                                                                              |                                                                                                                                                                                                                                                                                                                                                                                                                                                                                                                            |                                                                                     |                                    |                           |  |  |  |  |
|                           |                                                                                                              |                                                                                                                                                                                                                                                                                                                                                                                                                                                                                                                            |                                                                                     |                                    |                           |  |  |  |  |
|                           |                                                                                                              |                                                                                                                                                                                                                                                                                                                                                                                                                                                                                                                            |                                                                                     |                                    |                           |  |  |  |  |
| 6                         | Payment for expert testimony                                                                                 | <input checked="" type="checkbox"/> <b>None</b><br><table border="1" style="width: 100%; border-collapse: collapse;"> <tr><td style="width: 50%; height: 15px;"></td><td style="width: 50%;"></td></tr> <tr><td style="height: 15px;"></td><td></td></tr> <tr><td style="height: 15px;"></td><td></td></tr> </table>                                                                                                                                                                                                       |                                                                                     |                                    |                           |  |  |  |  |
|                           |                                                                                                              |                                                                                                                                                                                                                                                                                                                                                                                                                                                                                                                            |                                                                                     |                                    |                           |  |  |  |  |
|                           |                                                                                                              |                                                                                                                                                                                                                                                                                                                                                                                                                                                                                                                            |                                                                                     |                                    |                           |  |  |  |  |
|                           |                                                                                                              |                                                                                                                                                                                                                                                                                                                                                                                                                                                                                                                            |                                                                                     |                                    |                           |  |  |  |  |
| 7                         | Support for attending meetings and/or travel                                                                 | <input checked="" type="checkbox"/> <b>None</b><br><table border="1" style="width: 100%; border-collapse: collapse;"> <tr><td style="width: 50%; height: 15px;"></td><td style="width: 50%;"></td></tr> <tr><td style="height: 15px;"></td><td></td></tr> <tr><td style="height: 15px;"></td><td></td></tr> </table>                                                                                                                                                                                                       |                                                                                     |                                    |                           |  |  |  |  |
|                           |                                                                                                              |                                                                                                                                                                                                                                                                                                                                                                                                                                                                                                                            |                                                                                     |                                    |                           |  |  |  |  |
|                           |                                                                                                              |                                                                                                                                                                                                                                                                                                                                                                                                                                                                                                                            |                                                                                     |                                    |                           |  |  |  |  |
|                           |                                                                                                              |                                                                                                                                                                                                                                                                                                                                                                                                                                                                                                                            |                                                                                     |                                    |                           |  |  |  |  |
| 8                         | Patents planned, issued or pending                                                                           | <input checked="" type="checkbox"/> <b>None</b><br><table border="1" style="width: 100%; border-collapse: collapse;"> <tr><td style="width: 50%; height: 15px;"></td><td style="width: 50%;"></td></tr> <tr><td style="height: 15px;"></td><td></td></tr> <tr><td style="height: 15px;"></td><td></td></tr> </table>                                                                                                                                                                                                       |                                                                                     |                                    |                           |  |  |  |  |
|                           |                                                                                                              |                                                                                                                                                                                                                                                                                                                                                                                                                                                                                                                            |                                                                                     |                                    |                           |  |  |  |  |
|                           |                                                                                                              |                                                                                                                                                                                                                                                                                                                                                                                                                                                                                                                            |                                                                                     |                                    |                           |  |  |  |  |
|                           |                                                                                                              |                                                                                                                                                                                                                                                                                                                                                                                                                                                                                                                            |                                                                                     |                                    |                           |  |  |  |  |
| 9                         | Participation on a Data Safety Monitoring Board or Advisory Board                                            | <input checked="" type="checkbox"/> <b>None</b><br><table border="1" style="width: 100%; border-collapse: collapse;"> <tr><td style="width: 50%; height: 15px;"></td><td style="width: 50%;"></td></tr> <tr><td style="height: 15px;"></td><td></td></tr> <tr><td style="height: 15px;"></td><td></td></tr> </table>                                                                                                                                                                                                       |                                                                                     |                                    |                           |  |  |  |  |
|                           |                                                                                                              |                                                                                                                                                                                                                                                                                                                                                                                                                                                                                                                            |                                                                                     |                                    |                           |  |  |  |  |
|                           |                                                                                                              |                                                                                                                                                                                                                                                                                                                                                                                                                                                                                                                            |                                                                                     |                                    |                           |  |  |  |  |
|                           |                                                                                                              |                                                                                                                                                                                                                                                                                                                                                                                                                                                                                                                            |                                                                                     |                                    |                           |  |  |  |  |
| 10                        | Leadership or fiduciary role in other board,                                                                 | <input checked="" type="checkbox"/> <b>None</b><br><table border="1" style="width: 100%; border-collapse: collapse;"> <tr><td style="width: 50%; height: 15px;"></td><td style="width: 50%;"></td></tr> </table>                                                                                                                                                                                                                                                                                                           |                                                                                     |                                    |                           |  |  |  |  |
|                           |                                                                                                              |                                                                                                                                                                                                                                                                                                                                                                                                                                                                                                                            |                                                                                     |                                    |                           |  |  |  |  |

|           |                                                                                  | Name all entities with whom you have this relationship or indicate none (add rows as needed) | Specifications/Comments (e.g., if payments were made to you or to your institution) |
|-----------|----------------------------------------------------------------------------------|----------------------------------------------------------------------------------------------|-------------------------------------------------------------------------------------|
|           | society, committee or advocacy group, paid or unpaid                             |                                                                                              |                                                                                     |
| <b>11</b> | Stock or stock options                                                           | <input checked="" type="checkbox"/> <b>None</b>                                              |                                                                                     |
|           |                                                                                  |                                                                                              |                                                                                     |
|           |                                                                                  |                                                                                              |                                                                                     |
| <b>12</b> | Receipt of equipment, materials, drugs, medical writing, gifts or other services | <input checked="" type="checkbox"/> <b>None</b>                                              |                                                                                     |
|           |                                                                                  |                                                                                              |                                                                                     |
|           |                                                                                  |                                                                                              |                                                                                     |
| <b>13</b> | Other financial or non-financial interests                                       | <input checked="" type="checkbox"/> <b>None</b>                                              |                                                                                     |
|           |                                                                                  |                                                                                              |                                                                                     |
|           |                                                                                  |                                                                                              |                                                                                     |

Please place an "X" next to the following statement to indicate your agreement:

I certify that I have answered every question and have not altered the wording of any of the questions on this form.

## ICMJE DISCLOSURE FORM

**Date:** 8/7/2023

**Your Name:** Steven-Huy Han

**Manuscript Title:** Safety and off-treatment response of patients with chronic hepatitis B virus infection receiving long-term open-label vebicorvir

**Manuscript Number (if known):** [Click or tap here to enter text.](#)

In the interest of transparency, we ask you to disclose all relationships/activities/interests listed below that are related to the content of your manuscript. "Related" means any relation with for-profit or not-for-profit third parties whose interests may be affected by the content of the manuscript. Disclosure represents a commitment to transparency and does not necessarily indicate a bias. If you are in doubt about whether to list a relationship/activity/interest, it is preferable that you do so.

In the interest of transparency, we ask you to disclose all relationships/activities/interests listed below that are related to the content of your manuscript. "Related" means any relation with for-profit or not-for-profit third parties whose interests may be affected by the content of the manuscript. Disclosure represents a commitment to transparency and does not necessarily indicate a bias. If you are in doubt about whether to list a relationship/activity/interest, it is preferable that you do so.

The author's relationships/activities/interests should be defined broadly. For example, if your manuscript pertains to the epidemiology of hypertension, you should declare all relationships with manufacturers of antihypertensive medication, even if that medication is not mentioned in the manuscript.

In item #1 below, report all support for the work reported in this manuscript without time limit. For all other items, the time frame for disclosure is the past 36 months.

|                                                    | Name all entities with whom you have this relationship or indicate none (add rows as needed)                                                                                   | Specifications/Comments (e.g., if payments were made to you or to your institution)                                                                                                                                                                                                                                                                                                                                         |  |  |  |  |  |                                           |
|----------------------------------------------------|--------------------------------------------------------------------------------------------------------------------------------------------------------------------------------|-----------------------------------------------------------------------------------------------------------------------------------------------------------------------------------------------------------------------------------------------------------------------------------------------------------------------------------------------------------------------------------------------------------------------------|--|--|--|--|--|-------------------------------------------|
| Time frame: Since the initial planning of the work |                                                                                                                                                                                |                                                                                                                                                                                                                                                                                                                                                                                                                             |  |  |  |  |  |                                           |
| <b>1</b>                                           | All support for the present manuscript (e.g., funding, provision of study materials, medical writing, article processing charges, etc.)<br><b>No time limit for this item.</b> | <input checked="" type="checkbox"/> <b>None</b><br><table border="1" style="width: 100%; border-collapse: collapse; margin-top: 5px;"> <tr><td style="width: 50%; height: 20px;"></td><td style="width: 50%;"></td></tr> <tr><td style="height: 20px;"></td><td></td></tr> <tr><td style="height: 20px;"></td><td style="text-align: right; font-size: small;">Click the tab key to add additional rows.</td></tr> </table> |  |  |  |  |  | Click the tab key to add additional rows. |
|                                                    |                                                                                                                                                                                |                                                                                                                                                                                                                                                                                                                                                                                                                             |  |  |  |  |  |                                           |
|                                                    |                                                                                                                                                                                |                                                                                                                                                                                                                                                                                                                                                                                                                             |  |  |  |  |  |                                           |
|                                                    | Click the tab key to add additional rows.                                                                                                                                      |                                                                                                                                                                                                                                                                                                                                                                                                                             |  |  |  |  |  |                                           |
| Time frame: past 36 months                         |                                                                                                                                                                                |                                                                                                                                                                                                                                                                                                                                                                                                                             |  |  |  |  |  |                                           |
| <b>2</b>                                           | Grants or contracts from any entity (if not indicated in item #1 above).                                                                                                       | <input checked="" type="checkbox"/> <b>None</b><br><table border="1" style="width: 100%; border-collapse: collapse; margin-top: 5px;"> <tr><td style="width: 50%; height: 20px;"></td><td style="width: 50%;"></td></tr> <tr><td style="height: 20px;"></td><td></td></tr> <tr><td style="height: 20px;"></td><td></td></tr> </table>                                                                                       |  |  |  |  |  |                                           |
|                                                    |                                                                                                                                                                                |                                                                                                                                                                                                                                                                                                                                                                                                                             |  |  |  |  |  |                                           |
|                                                    |                                                                                                                                                                                |                                                                                                                                                                                                                                                                                                                                                                                                                             |  |  |  |  |  |                                           |
|                                                    |                                                                                                                                                                                |                                                                                                                                                                                                                                                                                                                                                                                                                             |  |  |  |  |  |                                           |

|                 |                                                                                                              | Name all entities with whom you have this relationship or indicate none (add rows as needed)                                                                                                                                                                                                                                                                                   | Specifications/Comments (e.g., if payments were made to you or to your institution) |                 |  |  |  |  |  |  |  |
|-----------------|--------------------------------------------------------------------------------------------------------------|--------------------------------------------------------------------------------------------------------------------------------------------------------------------------------------------------------------------------------------------------------------------------------------------------------------------------------------------------------------------------------|-------------------------------------------------------------------------------------|-----------------|--|--|--|--|--|--|--|
| 3               | Royalties or licenses                                                                                        | <input checked="" type="checkbox"/> <b>None</b><br><table border="1" style="width: 100%; border-collapse: collapse;"> <tr><td style="width: 50%; height: 15px;"></td><td style="width: 50%;"></td></tr> <tr><td style="height: 15px;"></td><td></td></tr> <tr><td style="height: 15px;"></td><td></td></tr> </table>                                                           |                                                                                     |                 |  |  |  |  |  |  |  |
|                 |                                                                                                              |                                                                                                                                                                                                                                                                                                                                                                                |                                                                                     |                 |  |  |  |  |  |  |  |
|                 |                                                                                                              |                                                                                                                                                                                                                                                                                                                                                                                |                                                                                     |                 |  |  |  |  |  |  |  |
|                 |                                                                                                              |                                                                                                                                                                                                                                                                                                                                                                                |                                                                                     |                 |  |  |  |  |  |  |  |
| 4               | Consulting fees                                                                                              | <input type="checkbox"/> <b>None</b><br><table border="1" style="width: 100%; border-collapse: collapse;"> <tr> <td style="width: 50%;">Gilead Sciences</td> <td style="width: 50%;">Consultant</td> </tr> <tr><td style="height: 15px;"></td><td></td></tr> <tr><td style="height: 15px;"></td><td></td></tr> </table>                                                        | Gilead Sciences                                                                     | Consultant      |  |  |  |  |  |  |  |
| Gilead Sciences | Consultant                                                                                                   |                                                                                                                                                                                                                                                                                                                                                                                |                                                                                     |                 |  |  |  |  |  |  |  |
|                 |                                                                                                              |                                                                                                                                                                                                                                                                                                                                                                                |                                                                                     |                 |  |  |  |  |  |  |  |
|                 |                                                                                                              |                                                                                                                                                                                                                                                                                                                                                                                |                                                                                     |                 |  |  |  |  |  |  |  |
| 5               | Payment or honoraria for lectures, presentations, speakers bureaus, manuscript writing or educational events | <input type="checkbox"/> <b>None</b><br><table border="1" style="width: 100%; border-collapse: collapse;"> <tr> <td style="width: 50%;">Gilead Sciences</td> <td style="width: 50%;">Speakers bureau</td> </tr> <tr><td style="height: 15px;"></td><td></td></tr> <tr><td style="height: 15px;"></td><td></td></tr> <tr><td style="height: 15px;"></td><td></td></tr> </table> | Gilead Sciences                                                                     | Speakers bureau |  |  |  |  |  |  |  |
| Gilead Sciences | Speakers bureau                                                                                              |                                                                                                                                                                                                                                                                                                                                                                                |                                                                                     |                 |  |  |  |  |  |  |  |
|                 |                                                                                                              |                                                                                                                                                                                                                                                                                                                                                                                |                                                                                     |                 |  |  |  |  |  |  |  |
|                 |                                                                                                              |                                                                                                                                                                                                                                                                                                                                                                                |                                                                                     |                 |  |  |  |  |  |  |  |
|                 |                                                                                                              |                                                                                                                                                                                                                                                                                                                                                                                |                                                                                     |                 |  |  |  |  |  |  |  |
| 6               | Payment for expert testimony                                                                                 | <input checked="" type="checkbox"/> <b>None</b><br><table border="1" style="width: 100%; border-collapse: collapse;"> <tr><td style="width: 50%; height: 15px;"></td><td style="width: 50%;"></td></tr> <tr><td style="height: 15px;"></td><td></td></tr> <tr><td style="height: 15px;"></td><td></td></tr> </table>                                                           |                                                                                     |                 |  |  |  |  |  |  |  |
|                 |                                                                                                              |                                                                                                                                                                                                                                                                                                                                                                                |                                                                                     |                 |  |  |  |  |  |  |  |
|                 |                                                                                                              |                                                                                                                                                                                                                                                                                                                                                                                |                                                                                     |                 |  |  |  |  |  |  |  |
|                 |                                                                                                              |                                                                                                                                                                                                                                                                                                                                                                                |                                                                                     |                 |  |  |  |  |  |  |  |
| 7               | Support for attending meetings and/or travel                                                                 | <input checked="" type="checkbox"/> <b>None</b><br><table border="1" style="width: 100%; border-collapse: collapse;"> <tr><td style="width: 50%; height: 15px;"></td><td style="width: 50%;"></td></tr> <tr><td style="height: 15px;"></td><td></td></tr> <tr><td style="height: 15px;"></td><td></td></tr> </table>                                                           |                                                                                     |                 |  |  |  |  |  |  |  |
|                 |                                                                                                              |                                                                                                                                                                                                                                                                                                                                                                                |                                                                                     |                 |  |  |  |  |  |  |  |
|                 |                                                                                                              |                                                                                                                                                                                                                                                                                                                                                                                |                                                                                     |                 |  |  |  |  |  |  |  |
|                 |                                                                                                              |                                                                                                                                                                                                                                                                                                                                                                                |                                                                                     |                 |  |  |  |  |  |  |  |
| 8               | Patents planned, issued or pending                                                                           | <input checked="" type="checkbox"/> <b>None</b><br><table border="1" style="width: 100%; border-collapse: collapse;"> <tr><td style="width: 50%; height: 15px;"></td><td style="width: 50%;"></td></tr> <tr><td style="height: 15px;"></td><td></td></tr> <tr><td style="height: 15px;"></td><td></td></tr> </table>                                                           |                                                                                     |                 |  |  |  |  |  |  |  |
|                 |                                                                                                              |                                                                                                                                                                                                                                                                                                                                                                                |                                                                                     |                 |  |  |  |  |  |  |  |
|                 |                                                                                                              |                                                                                                                                                                                                                                                                                                                                                                                |                                                                                     |                 |  |  |  |  |  |  |  |
|                 |                                                                                                              |                                                                                                                                                                                                                                                                                                                                                                                |                                                                                     |                 |  |  |  |  |  |  |  |
| 9               | Participation on a Data Safety Monitoring Board or Advisory Board                                            | <input checked="" type="checkbox"/> <b>None</b><br><table border="1" style="width: 100%; border-collapse: collapse;"> <tr><td style="width: 50%; height: 15px;"></td><td style="width: 50%;"></td></tr> <tr><td style="height: 15px;"></td><td></td></tr> <tr><td style="height: 15px;"></td><td></td></tr> </table>                                                           |                                                                                     |                 |  |  |  |  |  |  |  |
|                 |                                                                                                              |                                                                                                                                                                                                                                                                                                                                                                                |                                                                                     |                 |  |  |  |  |  |  |  |
|                 |                                                                                                              |                                                                                                                                                                                                                                                                                                                                                                                |                                                                                     |                 |  |  |  |  |  |  |  |
|                 |                                                                                                              |                                                                                                                                                                                                                                                                                                                                                                                |                                                                                     |                 |  |  |  |  |  |  |  |
| 10              | Leadership or fiduciary role in other board,                                                                 | <input checked="" type="checkbox"/> <b>None</b><br><table border="1" style="width: 100%; border-collapse: collapse;"> <tr><td style="width: 50%; height: 15px;"></td><td style="width: 50%;"></td></tr> </table>                                                                                                                                                               |                                                                                     |                 |  |  |  |  |  |  |  |
|                 |                                                                                                              |                                                                                                                                                                                                                                                                                                                                                                                |                                                                                     |                 |  |  |  |  |  |  |  |

|           |                                                                                  | Name all entities with whom you have this relationship or indicate none (add rows as needed) | Specifications/Comments (e.g., if payments were made to you or to your institution) |
|-----------|----------------------------------------------------------------------------------|----------------------------------------------------------------------------------------------|-------------------------------------------------------------------------------------|
|           | society, committee or advocacy group, paid or unpaid                             |                                                                                              |                                                                                     |
| <b>11</b> | Stock or stock options                                                           | <input checked="" type="checkbox"/> <b>None</b>                                              |                                                                                     |
|           |                                                                                  |                                                                                              |                                                                                     |
|           |                                                                                  |                                                                                              |                                                                                     |
| <b>12</b> | Receipt of equipment, materials, drugs, medical writing, gifts or other services | <input checked="" type="checkbox"/> <b>None</b>                                              |                                                                                     |
|           |                                                                                  |                                                                                              |                                                                                     |
|           |                                                                                  |                                                                                              |                                                                                     |
| <b>13</b> | Other financial or non-financial interests                                       | <input checked="" type="checkbox"/> <b>None</b>                                              |                                                                                     |
|           |                                                                                  |                                                                                              |                                                                                     |
|           |                                                                                  |                                                                                              |                                                                                     |

Please place an "X" next to the following statement to indicate your agreement:

I certify that I have answered every question and have not altered the wording of any of the questions on this form.

## ICMJE DISCLOSURE FORM

**Date:** 8/7/2023

**Your Name:** Edward J Gane

**Manuscript Title:** Safety and off-treatment response of patients with chronic hepatitis B virus infection receiving long-term open-label vebicorvir

**Manuscript Number (if known):** [Click or tap here to enter text.](#)

In the interest of transparency, we ask you to disclose all relationships/activities/interests listed below that are related to the content of your manuscript. "Related" means any relation with for-profit or not-for-profit third parties whose interests may be affected by the content of the manuscript. Disclosure represents a commitment to transparency and does not necessarily indicate a bias. If you are in doubt about whether to list a relationship/activity/interest, it is preferable that you do so.

In the interest of transparency, we ask you to disclose all relationships/activities/interests listed below that are related to the content of your manuscript. "Related" means any relation with for-profit or not-for-profit third parties whose interests may be affected by the content of the manuscript. Disclosure represents a commitment to transparency and does not necessarily indicate a bias. If you are in doubt about whether to list a relationship/activity/interest, it is preferable that you do so.

The author's relationships/activities/interests should be defined broadly. For example, if your manuscript pertains to the epidemiology of hypertension, you should declare all relationships with manufacturers of antihypertensive medication, even if that medication is not mentioned in the manuscript.

In item #1 below, report all support for the work reported in this manuscript without time limit. For all other items, the time frame for disclosure is the past 36 months.

|                                                    | Name all entities with whom you have this relationship or indicate none (add rows as needed)                                                                                   | Specifications/Comments (e.g., if payments were made to you or to your institution)                                                                                                                                                                                                                                                                                     |  |  |  |  |  |  |
|----------------------------------------------------|--------------------------------------------------------------------------------------------------------------------------------------------------------------------------------|-------------------------------------------------------------------------------------------------------------------------------------------------------------------------------------------------------------------------------------------------------------------------------------------------------------------------------------------------------------------------|--|--|--|--|--|--|
| Time frame: Since the initial planning of the work |                                                                                                                                                                                |                                                                                                                                                                                                                                                                                                                                                                         |  |  |  |  |  |  |
| <b>1</b>                                           | All support for the present manuscript (e.g., funding, provision of study materials, medical writing, article processing charges, etc.)<br><b>No time limit for this item.</b> | <input checked="" type="checkbox"/> <b>None</b><br><table border="1" style="width: 100%; height: 40px; margin-top: 5px;"> <tr><td style="width: 60%;"></td><td style="width: 40%;"></td></tr> <tr><td></td><td></td></tr> <tr><td></td><td></td></tr> </table> <p style="font-size: small; color: gray; margin-top: 5px;">Click the tab key to add additional rows.</p> |  |  |  |  |  |  |
|                                                    |                                                                                                                                                                                |                                                                                                                                                                                                                                                                                                                                                                         |  |  |  |  |  |  |
|                                                    |                                                                                                                                                                                |                                                                                                                                                                                                                                                                                                                                                                         |  |  |  |  |  |  |
|                                                    |                                                                                                                                                                                |                                                                                                                                                                                                                                                                                                                                                                         |  |  |  |  |  |  |
| Time frame: past 36 months                         |                                                                                                                                                                                |                                                                                                                                                                                                                                                                                                                                                                         |  |  |  |  |  |  |
| <b>2</b>                                           | Grants or contracts from any entity (if not indicated in item #1 above).                                                                                                       | <input checked="" type="checkbox"/> <b>None</b><br><table border="1" style="width: 100%; height: 40px; margin-top: 5px;"> <tr><td style="width: 60%;"></td><td style="width: 40%;"></td></tr> <tr><td></td><td></td></tr> <tr><td></td><td></td></tr> </table>                                                                                                          |  |  |  |  |  |  |
|                                                    |                                                                                                                                                                                |                                                                                                                                                                                                                                                                                                                                                                         |  |  |  |  |  |  |
|                                                    |                                                                                                                                                                                |                                                                                                                                                                                                                                                                                                                                                                         |  |  |  |  |  |  |
|                                                    |                                                                                                                                                                                |                                                                                                                                                                                                                                                                                                                                                                         |  |  |  |  |  |  |

|                      |                                                                                                              | Name all entities with whom you have this relationship or indicate none (add rows as needed)                                                                                                                                                                                                                                                                                                                                                                      | Specifications/Comments (e.g., if payments were made to you or to your institution) |                            |                     |                      |                 |                 |          |         |  |
|----------------------|--------------------------------------------------------------------------------------------------------------|-------------------------------------------------------------------------------------------------------------------------------------------------------------------------------------------------------------------------------------------------------------------------------------------------------------------------------------------------------------------------------------------------------------------------------------------------------------------|-------------------------------------------------------------------------------------|----------------------------|---------------------|----------------------|-----------------|-----------------|----------|---------|--|
| 3                    | Royalties or licenses                                                                                        | <input checked="" type="checkbox"/> <b>None</b><br><table border="1" style="width: 100%; border-collapse: collapse;"> <tr><td style="width: 50%; height: 20px;"></td><td style="width: 50%;"></td></tr> <tr><td style="height: 20px;"></td><td></td></tr> <tr><td style="height: 20px;"></td><td></td></tr> </table>                                                                                                                                              |                                                                                     |                            |                     |                      |                 |                 |          |         |  |
|                      |                                                                                                              |                                                                                                                                                                                                                                                                                                                                                                                                                                                                   |                                                                                     |                            |                     |                      |                 |                 |          |         |  |
|                      |                                                                                                              |                                                                                                                                                                                                                                                                                                                                                                                                                                                                   |                                                                                     |                            |                     |                      |                 |                 |          |         |  |
|                      |                                                                                                              |                                                                                                                                                                                                                                                                                                                                                                                                                                                                   |                                                                                     |                            |                     |                      |                 |                 |          |         |  |
| 4                    | Consulting fees                                                                                              | <input checked="" type="checkbox"/> <b>None</b><br><table border="1" style="width: 100%; border-collapse: collapse;"> <tr><td style="width: 50%; height: 20px;"></td><td style="width: 50%;"></td></tr> <tr><td style="height: 20px;"></td><td></td></tr> <tr><td style="height: 20px;"></td><td></td></tr> </table>                                                                                                                                              |                                                                                     |                            |                     |                      |                 |                 |          |         |  |
|                      |                                                                                                              |                                                                                                                                                                                                                                                                                                                                                                                                                                                                   |                                                                                     |                            |                     |                      |                 |                 |          |         |  |
|                      |                                                                                                              |                                                                                                                                                                                                                                                                                                                                                                                                                                                                   |                                                                                     |                            |                     |                      |                 |                 |          |         |  |
|                      |                                                                                                              |                                                                                                                                                                                                                                                                                                                                                                                                                                                                   |                                                                                     |                            |                     |                      |                 |                 |          |         |  |
| 5                    | Payment or honoraria for lectures, presentations, speakers bureaus, manuscript writing or educational events | <input type="checkbox"/> <b>None</b><br><table border="1" style="width: 100%; border-collapse: collapse;"> <tr> <td style="width: 50%;">Abbott Diagnostics</td> <td style="width: 50%;">Served as a speaker</td> </tr> <tr> <td>AbbVie</td> <td></td> </tr> <tr> <td>Gilead Sciences</td> <td></td> </tr> </table>                                                                                                                                                | Abbott Diagnostics                                                                  | Served as a speaker        | AbbVie              |                      | Gilead Sciences |                 |          |         |  |
| Abbott Diagnostics   | Served as a speaker                                                                                          |                                                                                                                                                                                                                                                                                                                                                                                                                                                                   |                                                                                     |                            |                     |                      |                 |                 |          |         |  |
| AbbVie               |                                                                                                              |                                                                                                                                                                                                                                                                                                                                                                                                                                                                   |                                                                                     |                            |                     |                      |                 |                 |          |         |  |
| Gilead Sciences      |                                                                                                              |                                                                                                                                                                                                                                                                                                                                                                                                                                                                   |                                                                                     |                            |                     |                      |                 |                 |          |         |  |
| 6                    | Payment for expert testimony                                                                                 | <input checked="" type="checkbox"/> <b>None</b><br><table border="1" style="width: 100%; border-collapse: collapse;"> <tr><td style="width: 50%; height: 20px;"></td><td style="width: 50%;"></td></tr> <tr><td style="height: 20px;"></td><td></td></tr> <tr><td style="height: 20px;"></td><td></td></tr> </table>                                                                                                                                              |                                                                                     |                            |                     |                      |                 |                 |          |         |  |
|                      |                                                                                                              |                                                                                                                                                                                                                                                                                                                                                                                                                                                                   |                                                                                     |                            |                     |                      |                 |                 |          |         |  |
|                      |                                                                                                              |                                                                                                                                                                                                                                                                                                                                                                                                                                                                   |                                                                                     |                            |                     |                      |                 |                 |          |         |  |
|                      |                                                                                                              |                                                                                                                                                                                                                                                                                                                                                                                                                                                                   |                                                                                     |                            |                     |                      |                 |                 |          |         |  |
| 7                    | Support for attending meetings and/or travel                                                                 | <input checked="" type="checkbox"/> <b>None</b><br><table border="1" style="width: 100%; border-collapse: collapse;"> <tr><td style="width: 50%; height: 20px;"></td><td style="width: 50%;"></td></tr> <tr><td style="height: 20px;"></td><td></td></tr> <tr><td style="height: 20px;"></td><td></td></tr> </table>                                                                                                                                              |                                                                                     |                            |                     |                      |                 |                 |          |         |  |
|                      |                                                                                                              |                                                                                                                                                                                                                                                                                                                                                                                                                                                                   |                                                                                     |                            |                     |                      |                 |                 |          |         |  |
|                      |                                                                                                              |                                                                                                                                                                                                                                                                                                                                                                                                                                                                   |                                                                                     |                            |                     |                      |                 |                 |          |         |  |
|                      |                                                                                                              |                                                                                                                                                                                                                                                                                                                                                                                                                                                                   |                                                                                     |                            |                     |                      |                 |                 |          |         |  |
| 8                    | Patents planned, issued or pending                                                                           | <input checked="" type="checkbox"/> <b>None</b><br><table border="1" style="width: 100%; border-collapse: collapse;"> <tr><td style="width: 50%; height: 20px;"></td><td style="width: 50%;"></td></tr> <tr><td style="height: 20px;"></td><td></td></tr> <tr><td style="height: 20px;"></td><td></td></tr> </table>                                                                                                                                              |                                                                                     |                            |                     |                      |                 |                 |          |         |  |
|                      |                                                                                                              |                                                                                                                                                                                                                                                                                                                                                                                                                                                                   |                                                                                     |                            |                     |                      |                 |                 |          |         |  |
|                      |                                                                                                              |                                                                                                                                                                                                                                                                                                                                                                                                                                                                   |                                                                                     |                            |                     |                      |                 |                 |          |         |  |
|                      |                                                                                                              |                                                                                                                                                                                                                                                                                                                                                                                                                                                                   |                                                                                     |                            |                     |                      |                 |                 |          |         |  |
| 9                    | Participation on a Data Safety Monitoring Board or Advisory Board                                            | <input type="checkbox"/> <b>None</b><br><table border="1" style="width: 100%; border-collapse: collapse;"> <tr> <td style="width: 50%;">AbbVie</td> <td rowspan="6" style="width: 50%; vertical-align: top;">Serving on advisory boards</td> </tr> <tr><td>Aligos Therapeutics</td></tr> <tr><td>Assembly Biosciences</td></tr> <tr><td>Gilead Sciences</td></tr> <tr><td>GlaxoSmithKline</td></tr> <tr><td>Intellia</td></tr> <tr><td>Janssen</td></tr> </table> | AbbVie                                                                              | Serving on advisory boards | Aligos Therapeutics | Assembly Biosciences | Gilead Sciences | GlaxoSmithKline | Intellia | Janssen |  |
| AbbVie               | Serving on advisory boards                                                                                   |                                                                                                                                                                                                                                                                                                                                                                                                                                                                   |                                                                                     |                            |                     |                      |                 |                 |          |         |  |
| Aligos Therapeutics  |                                                                                                              |                                                                                                                                                                                                                                                                                                                                                                                                                                                                   |                                                                                     |                            |                     |                      |                 |                 |          |         |  |
| Assembly Biosciences |                                                                                                              |                                                                                                                                                                                                                                                                                                                                                                                                                                                                   |                                                                                     |                            |                     |                      |                 |                 |          |         |  |
| Gilead Sciences      |                                                                                                              |                                                                                                                                                                                                                                                                                                                                                                                                                                                                   |                                                                                     |                            |                     |                      |                 |                 |          |         |  |
| GlaxoSmithKline      |                                                                                                              |                                                                                                                                                                                                                                                                                                                                                                                                                                                                   |                                                                                     |                            |                     |                      |                 |                 |          |         |  |
| Intellia             |                                                                                                              |                                                                                                                                                                                                                                                                                                                                                                                                                                                                   |                                                                                     |                            |                     |                      |                 |                 |          |         |  |
| Janssen              |                                                                                                              |                                                                                                                                                                                                                                                                                                                                                                                                                                                                   |                                                                                     |                            |                     |                      |                 |                 |          |         |  |



|                   |                                                                                                   | Name all entities with whom you have this relationship or indicate none (add rows as needed)                                                                       | Specifications/Comments (e.g., if payments were made to you or to your institution) |                   |        |  |  |  |  |
|-------------------|---------------------------------------------------------------------------------------------------|--------------------------------------------------------------------------------------------------------------------------------------------------------------------|-------------------------------------------------------------------------------------|-------------------|--------|--|--|--|--|
|                   |                                                                                                   | <table border="1"> <tr><td>Roche</td></tr> <tr><td>Vir Biotechnology</td></tr> <tr><td>Virion</td></tr> </table>                                                   | Roche                                                                               | Vir Biotechnology | Virion |  |  |  |  |
| Roche             |                                                                                                   |                                                                                                                                                                    |                                                                                     |                   |        |  |  |  |  |
| Vir Biotechnology |                                                                                                   |                                                                                                                                                                    |                                                                                     |                   |        |  |  |  |  |
| Virion            |                                                                                                   |                                                                                                                                                                    |                                                                                     |                   |        |  |  |  |  |
| <b>10</b>         | Leadership or fiduciary role in other board, society, committee or advocacy group, paid or unpaid | <input checked="" type="checkbox"/> <b>None</b><br><table border="1"> <tr><td></td><td></td></tr> <tr><td></td><td></td></tr> <tr><td></td><td></td></tr> </table> |                                                                                     |                   |        |  |  |  |  |
|                   |                                                                                                   |                                                                                                                                                                    |                                                                                     |                   |        |  |  |  |  |
|                   |                                                                                                   |                                                                                                                                                                    |                                                                                     |                   |        |  |  |  |  |
|                   |                                                                                                   |                                                                                                                                                                    |                                                                                     |                   |        |  |  |  |  |
| <b>11</b>         | Stock or stock options                                                                            | <input checked="" type="checkbox"/> <b>None</b><br><table border="1"> <tr><td></td><td></td></tr> <tr><td></td><td></td></tr> <tr><td></td><td></td></tr> </table> |                                                                                     |                   |        |  |  |  |  |
|                   |                                                                                                   |                                                                                                                                                                    |                                                                                     |                   |        |  |  |  |  |
|                   |                                                                                                   |                                                                                                                                                                    |                                                                                     |                   |        |  |  |  |  |
|                   |                                                                                                   |                                                                                                                                                                    |                                                                                     |                   |        |  |  |  |  |
| <b>12</b>         | Receipt of equipment, materials, drugs, medical writing, gifts or other services                  | <input checked="" type="checkbox"/> <b>None</b><br><table border="1"> <tr><td></td><td></td></tr> <tr><td></td><td></td></tr> <tr><td></td><td></td></tr> </table> |                                                                                     |                   |        |  |  |  |  |
|                   |                                                                                                   |                                                                                                                                                                    |                                                                                     |                   |        |  |  |  |  |
|                   |                                                                                                   |                                                                                                                                                                    |                                                                                     |                   |        |  |  |  |  |
|                   |                                                                                                   |                                                                                                                                                                    |                                                                                     |                   |        |  |  |  |  |
| <b>13</b>         | Other financial or non-financial interests                                                        | <input checked="" type="checkbox"/> <b>None</b><br><table border="1"> <tr><td></td><td></td></tr> <tr><td></td><td></td></tr> <tr><td></td><td></td></tr> </table> |                                                                                     |                   |        |  |  |  |  |
|                   |                                                                                                   |                                                                                                                                                                    |                                                                                     |                   |        |  |  |  |  |
|                   |                                                                                                   |                                                                                                                                                                    |                                                                                     |                   |        |  |  |  |  |
|                   |                                                                                                   |                                                                                                                                                                    |                                                                                     |                   |        |  |  |  |  |

Please place an "X" next to the following statement to indicate your agreement:

I certify that I have answered every question and have not altered the wording of any of the questions on this form.

# ICMJE DISCLOSURE FORM

**Date:** 8/7/2023

**Your Name:** Katie Zomorodi

**Manuscript Title:** Safety and off-treatment response of patients with chronic hepatitis B virus infection receiving long-term open-label vebicorvir

**Manuscript Number (if known):** [Click or tap here to enter text.](#)

In the interest of transparency, we ask you to disclose all relationships/activities/interests listed below that are related to the content of your manuscript. "Related" means any relation with for-profit or not-for-profit third parties whose interests may be affected by the content of the manuscript. Disclosure represents a commitment to transparency and does not necessarily indicate a bias. If you are in doubt about whether to list a relationship/activity/interest, it is preferable that you do so.

In the interest of transparency, we ask you to disclose all relationships/activities/interests listed below that are related to the content of your manuscript. "Related" means any relation with for-profit or not-for-profit third parties whose interests may be affected by the content of the manuscript. Disclosure represents a commitment to transparency and does not necessarily indicate a bias. If you are in doubt about whether to list a relationship/activity/interest, it is preferable that you do so.

The author's relationships/activities/interests should be defined broadly. For example, if your manuscript pertains to the epidemiology of hypertension, you should declare all relationships with manufacturers of antihypertensive medication, even if that medication is not mentioned in the manuscript.

In item #1 below, report all support for the work reported in this manuscript without time limit. For all other items, the time frame for disclosure is the past 36 months.

|                                                           |                                                                                                                                                                                | Name all entities with whom you have this relationship or indicate none (add rows as needed) | Specifications/Comments (e.g., if payments were made to you or to your institution)                                                                                                                                                                                                                                                                                                            |                      |                  |  |  |                                                          |  |  |  |
|-----------------------------------------------------------|--------------------------------------------------------------------------------------------------------------------------------------------------------------------------------|----------------------------------------------------------------------------------------------|------------------------------------------------------------------------------------------------------------------------------------------------------------------------------------------------------------------------------------------------------------------------------------------------------------------------------------------------------------------------------------------------|----------------------|------------------|--|--|----------------------------------------------------------|--|--|--|
| <b>Time frame: Since the initial planning of the work</b> |                                                                                                                                                                                |                                                                                              |                                                                                                                                                                                                                                                                                                                                                                                                |                      |                  |  |  |                                                          |  |  |  |
| <b>1</b>                                                  | All support for the present manuscript (e.g., funding, provision of study materials, medical writing, article processing charges, etc.)<br><b>No time limit for this item.</b> | <input type="checkbox"/> <b>None</b>                                                         | <table border="1" style="width: 100%; border-collapse: collapse;"> <tr> <td style="width: 60%; padding: 2px;">Assembly Biosciences</td> <td style="padding: 2px;">Current Employee</td> </tr> <tr> <td style="height: 20px;"></td> <td></td> </tr> <tr> <td colspan="2" style="text-align: center; padding: 2px;"><small>Click the tab key to add additional rows.</small></td> </tr> </table> | Assembly Biosciences | Current Employee |  |  | <small>Click the tab key to add additional rows.</small> |  |  |  |
| Assembly Biosciences                                      | Current Employee                                                                                                                                                               |                                                                                              |                                                                                                                                                                                                                                                                                                                                                                                                |                      |                  |  |  |                                                          |  |  |  |
|                                                           |                                                                                                                                                                                |                                                                                              |                                                                                                                                                                                                                                                                                                                                                                                                |                      |                  |  |  |                                                          |  |  |  |
| <small>Click the tab key to add additional rows.</small>  |                                                                                                                                                                                |                                                                                              |                                                                                                                                                                                                                                                                                                                                                                                                |                      |                  |  |  |                                                          |  |  |  |
| <b>Time frame: past 36 months</b>                         |                                                                                                                                                                                |                                                                                              |                                                                                                                                                                                                                                                                                                                                                                                                |                      |                  |  |  |                                                          |  |  |  |
| <b>2</b>                                                  | Grants or contracts from any entity (if not indicated in item #1 above).                                                                                                       | <input checked="" type="checkbox"/> <b>None</b>                                              | <table border="1" style="width: 100%; border-collapse: collapse;"> <tr> <td style="width: 60%; height: 40px;"></td> <td></td> </tr> <tr> <td style="height: 20px;"></td> <td></td> </tr> <tr> <td style="height: 20px;"></td> <td></td> </tr> <tr> <td style="height: 20px;"></td> <td></td> </tr> </table>                                                                                    |                      |                  |  |  |                                                          |  |  |  |
|                                                           |                                                                                                                                                                                |                                                                                              |                                                                                                                                                                                                                                                                                                                                                                                                |                      |                  |  |  |                                                          |  |  |  |
|                                                           |                                                                                                                                                                                |                                                                                              |                                                                                                                                                                                                                                                                                                                                                                                                |                      |                  |  |  |                                                          |  |  |  |
|                                                           |                                                                                                                                                                                |                                                                                              |                                                                                                                                                                                                                                                                                                                                                                                                |                      |                  |  |  |                                                          |  |  |  |
|                                                           |                                                                                                                                                                                |                                                                                              |                                                                                                                                                                                                                                                                                                                                                                                                |                      |                  |  |  |                                                          |  |  |  |

|          |                                                                                                              | Name all entities with whom you have this relationship or indicate none (add rows as needed)                                                                                                                                                                                                                                                                                                                                                                                                                                 | Specifications/Comments (e.g., if payments were made to you or to your institution) |  |  |  |  |  |  |  |  |  |  |  |  |  |  |
|----------|--------------------------------------------------------------------------------------------------------------|------------------------------------------------------------------------------------------------------------------------------------------------------------------------------------------------------------------------------------------------------------------------------------------------------------------------------------------------------------------------------------------------------------------------------------------------------------------------------------------------------------------------------|-------------------------------------------------------------------------------------|--|--|--|--|--|--|--|--|--|--|--|--|--|--|
| <b>3</b> | Royalties or licenses                                                                                        | <input checked="" type="checkbox"/> <b>None</b><br><table border="1" style="width: 100%; border-collapse: collapse;"> <tr><td style="width: 50%; height: 15px;"></td><td style="width: 50%;"></td></tr> <tr><td style="height: 15px;"></td><td></td></tr> <tr><td style="height: 15px;"></td><td></td></tr> </table>                                                                                                                                                                                                         |                                                                                     |  |  |  |  |  |  |  |  |  |  |  |  |  |  |
|          |                                                                                                              |                                                                                                                                                                                                                                                                                                                                                                                                                                                                                                                              |                                                                                     |  |  |  |  |  |  |  |  |  |  |  |  |  |  |
|          |                                                                                                              |                                                                                                                                                                                                                                                                                                                                                                                                                                                                                                                              |                                                                                     |  |  |  |  |  |  |  |  |  |  |  |  |  |  |
|          |                                                                                                              |                                                                                                                                                                                                                                                                                                                                                                                                                                                                                                                              |                                                                                     |  |  |  |  |  |  |  |  |  |  |  |  |  |  |
| <b>4</b> | Consulting fees                                                                                              | <input checked="" type="checkbox"/> <b>None</b><br><table border="1" style="width: 100%; border-collapse: collapse;"> <tr><td style="width: 50%; height: 15px;"></td><td style="width: 50%;"></td></tr> <tr><td style="height: 15px;"></td><td></td></tr> </table> |                                                                                     |  |  |  |  |  |  |  |  |  |  |  |  |  |  |
|          |                                                                                                              |                                                                                                                                                                                                                                                                                                                                                                                                                                                                                                                              |                                                                                     |  |  |  |  |  |  |  |  |  |  |  |  |  |  |
|          |                                                                                                              |                                                                                                                                                                                                                                                                                                                                                                                                                                                                                                                              |                                                                                     |  |  |  |  |  |  |  |  |  |  |  |  |  |  |
|          |                                                                                                              |                                                                                                                                                                                                                                                                                                                                                                                                                                                                                                                              |                                                                                     |  |  |  |  |  |  |  |  |  |  |  |  |  |  |
|          |                                                                                                              |                                                                                                                                                                                                                                                                                                                                                                                                                                                                                                                              |                                                                                     |  |  |  |  |  |  |  |  |  |  |  |  |  |  |
|          |                                                                                                              |                                                                                                                                                                                                                                                                                                                                                                                                                                                                                                                              |                                                                                     |  |  |  |  |  |  |  |  |  |  |  |  |  |  |
|          |                                                                                                              |                                                                                                                                                                                                                                                                                                                                                                                                                                                                                                                              |                                                                                     |  |  |  |  |  |  |  |  |  |  |  |  |  |  |
|          |                                                                                                              |                                                                                                                                                                                                                                                                                                                                                                                                                                                                                                                              |                                                                                     |  |  |  |  |  |  |  |  |  |  |  |  |  |  |
| <b>5</b> | Payment or honoraria for lectures, presentations, speakers bureaus, manuscript writing or educational events | <input checked="" type="checkbox"/> <b>None</b><br><table border="1" style="width: 100%; border-collapse: collapse;"> <tr><td style="width: 50%; height: 15px;"></td><td style="width: 50%;"></td></tr> <tr><td style="height: 15px;"></td><td></td></tr> <tr><td style="height: 15px;"></td><td></td></tr> </table>                                                                                                                                                                                                         |                                                                                     |  |  |  |  |  |  |  |  |  |  |  |  |  |  |
|          |                                                                                                              |                                                                                                                                                                                                                                                                                                                                                                                                                                                                                                                              |                                                                                     |  |  |  |  |  |  |  |  |  |  |  |  |  |  |
|          |                                                                                                              |                                                                                                                                                                                                                                                                                                                                                                                                                                                                                                                              |                                                                                     |  |  |  |  |  |  |  |  |  |  |  |  |  |  |
|          |                                                                                                              |                                                                                                                                                                                                                                                                                                                                                                                                                                                                                                                              |                                                                                     |  |  |  |  |  |  |  |  |  |  |  |  |  |  |
| <b>6</b> | Payment for expert testimony                                                                                 | <input checked="" type="checkbox"/> <b>None</b><br><table border="1" style="width: 100%; border-collapse: collapse;"> <tr><td style="width: 50%; height: 15px;"></td><td style="width: 50%;"></td></tr> <tr><td style="height: 15px;"></td><td></td></tr> <tr><td style="height: 15px;"></td><td></td></tr> </table>                                                                                                                                                                                                         |                                                                                     |  |  |  |  |  |  |  |  |  |  |  |  |  |  |
|          |                                                                                                              |                                                                                                                                                                                                                                                                                                                                                                                                                                                                                                                              |                                                                                     |  |  |  |  |  |  |  |  |  |  |  |  |  |  |
|          |                                                                                                              |                                                                                                                                                                                                                                                                                                                                                                                                                                                                                                                              |                                                                                     |  |  |  |  |  |  |  |  |  |  |  |  |  |  |
|          |                                                                                                              |                                                                                                                                                                                                                                                                                                                                                                                                                                                                                                                              |                                                                                     |  |  |  |  |  |  |  |  |  |  |  |  |  |  |
| <b>7</b> | Support for attending meetings and/or travel                                                                 | <input checked="" type="checkbox"/> <b>None</b><br><table border="1" style="width: 100%; border-collapse: collapse;"> <tr><td style="width: 50%; height: 15px;"></td><td style="width: 50%;"></td></tr> <tr><td style="height: 15px;"></td><td></td></tr> <tr><td style="height: 15px;"></td><td></td></tr> </table>                                                                                                                                                                                                         |                                                                                     |  |  |  |  |  |  |  |  |  |  |  |  |  |  |
|          |                                                                                                              |                                                                                                                                                                                                                                                                                                                                                                                                                                                                                                                              |                                                                                     |  |  |  |  |  |  |  |  |  |  |  |  |  |  |
|          |                                                                                                              |                                                                                                                                                                                                                                                                                                                                                                                                                                                                                                                              |                                                                                     |  |  |  |  |  |  |  |  |  |  |  |  |  |  |
|          |                                                                                                              |                                                                                                                                                                                                                                                                                                                                                                                                                                                                                                                              |                                                                                     |  |  |  |  |  |  |  |  |  |  |  |  |  |  |
| <b>8</b> | Patents planned, issued or pending                                                                           | <input checked="" type="checkbox"/> <b>None</b><br><table border="1" style="width: 100%; border-collapse: collapse;"> <tr><td style="width: 50%; height: 15px;"></td><td style="width: 50%;"></td></tr> <tr><td style="height: 15px;"></td><td></td></tr> <tr><td style="height: 15px;"></td><td></td></tr> </table>                                                                                                                                                                                                         |                                                                                     |  |  |  |  |  |  |  |  |  |  |  |  |  |  |
|          |                                                                                                              |                                                                                                                                                                                                                                                                                                                                                                                                                                                                                                                              |                                                                                     |  |  |  |  |  |  |  |  |  |  |  |  |  |  |
|          |                                                                                                              |                                                                                                                                                                                                                                                                                                                                                                                                                                                                                                                              |                                                                                     |  |  |  |  |  |  |  |  |  |  |  |  |  |  |
|          |                                                                                                              |                                                                                                                                                                                                                                                                                                                                                                                                                                                                                                                              |                                                                                     |  |  |  |  |  |  |  |  |  |  |  |  |  |  |
| <b>9</b> | Participation on a Data Safety Monitoring Board or Advisory Board                                            | <input checked="" type="checkbox"/> <b>None</b><br><table border="1" style="width: 100%; border-collapse: collapse;"> <tr><td style="width: 50%; height: 15px;"></td><td style="width: 50%;"></td></tr> <tr><td style="height: 15px;"></td><td></td></tr> <tr><td style="height: 15px;"></td><td></td></tr> <tr><td style="height: 15px;"></td><td></td></tr> </table>                                                                                                                                                       |                                                                                     |  |  |  |  |  |  |  |  |  |  |  |  |  |  |
|          |                                                                                                              |                                                                                                                                                                                                                                                                                                                                                                                                                                                                                                                              |                                                                                     |  |  |  |  |  |  |  |  |  |  |  |  |  |  |
|          |                                                                                                              |                                                                                                                                                                                                                                                                                                                                                                                                                                                                                                                              |                                                                                     |  |  |  |  |  |  |  |  |  |  |  |  |  |  |
|          |                                                                                                              |                                                                                                                                                                                                                                                                                                                                                                                                                                                                                                                              |                                                                                     |  |  |  |  |  |  |  |  |  |  |  |  |  |  |
|          |                                                                                                              |                                                                                                                                                                                                                                                                                                                                                                                                                                                                                                                              |                                                                                     |  |  |  |  |  |  |  |  |  |  |  |  |  |  |

|                      |                                                                                                   | Name all entities with whom you have this relationship or indicate none (add rows as needed)                                                                                                                                                                                                                                  | Specifications/Comments (e.g., if payments were made to you or to your institution) |             |  |  |  |  |  |
|----------------------|---------------------------------------------------------------------------------------------------|-------------------------------------------------------------------------------------------------------------------------------------------------------------------------------------------------------------------------------------------------------------------------------------------------------------------------------|-------------------------------------------------------------------------------------|-------------|--|--|--|--|--|
| <b>10</b>            | Leadership or fiduciary role in other board, society, committee or advocacy group, paid or unpaid | <input checked="" type="checkbox"/> <b>None</b><br><table border="1" style="width: 100%; border-collapse: collapse;"> <tr><td style="width: 50%; height: 20px;"></td><td style="width: 50%;"></td></tr> <tr><td style="height: 20px;"></td><td></td></tr> <tr><td style="height: 20px;"></td><td></td></tr> </table>          |                                                                                     |             |  |  |  |  |  |
|                      |                                                                                                   |                                                                                                                                                                                                                                                                                                                               |                                                                                     |             |  |  |  |  |  |
|                      |                                                                                                   |                                                                                                                                                                                                                                                                                                                               |                                                                                     |             |  |  |  |  |  |
|                      |                                                                                                   |                                                                                                                                                                                                                                                                                                                               |                                                                                     |             |  |  |  |  |  |
| <b>11</b>            | Stock or stock options                                                                            | <input type="checkbox"/> <b>None</b><br><table border="1" style="width: 100%; border-collapse: collapse;"> <tr> <td style="width: 50%;">Assembly Biosciences</td> <td style="width: 50%;">Holds stock</td> </tr> <tr><td style="height: 20px;"></td><td></td></tr> <tr><td style="height: 20px;"></td><td></td></tr> </table> | Assembly Biosciences                                                                | Holds stock |  |  |  |  |  |
| Assembly Biosciences | Holds stock                                                                                       |                                                                                                                                                                                                                                                                                                                               |                                                                                     |             |  |  |  |  |  |
|                      |                                                                                                   |                                                                                                                                                                                                                                                                                                                               |                                                                                     |             |  |  |  |  |  |
|                      |                                                                                                   |                                                                                                                                                                                                                                                                                                                               |                                                                                     |             |  |  |  |  |  |
| <b>12</b>            | Receipt of equipment, materials, drugs, medical writing, gifts or other services                  | <input checked="" type="checkbox"/> <b>None</b><br><table border="1" style="width: 100%; border-collapse: collapse;"> <tr><td style="width: 50%; height: 20px;"></td><td style="width: 50%;"></td></tr> <tr><td style="height: 20px;"></td><td></td></tr> <tr><td style="height: 20px;"></td><td></td></tr> </table>          |                                                                                     |             |  |  |  |  |  |
|                      |                                                                                                   |                                                                                                                                                                                                                                                                                                                               |                                                                                     |             |  |  |  |  |  |
|                      |                                                                                                   |                                                                                                                                                                                                                                                                                                                               |                                                                                     |             |  |  |  |  |  |
|                      |                                                                                                   |                                                                                                                                                                                                                                                                                                                               |                                                                                     |             |  |  |  |  |  |
| <b>13</b>            | Other financial or non-financial interests                                                        | <input checked="" type="checkbox"/> <b>None</b><br><table border="1" style="width: 100%; border-collapse: collapse;"> <tr><td style="width: 50%; height: 20px;"></td><td style="width: 50%;"></td></tr> <tr><td style="height: 20px;"></td><td></td></tr> <tr><td style="height: 20px;"></td><td></td></tr> </table>          |                                                                                     |             |  |  |  |  |  |
|                      |                                                                                                   |                                                                                                                                                                                                                                                                                                                               |                                                                                     |             |  |  |  |  |  |
|                      |                                                                                                   |                                                                                                                                                                                                                                                                                                                               |                                                                                     |             |  |  |  |  |  |
|                      |                                                                                                   |                                                                                                                                                                                                                                                                                                                               |                                                                                     |             |  |  |  |  |  |

**Please place an "X" next to the following statement to indicate your agreement:**

I certify that I have answered every question and have not altered the wording of any of the questions on this form.

## ICMJE DISCLOSURE FORM

**Date:** 8/7/2023

**Your Name:** Ran Yan

**Manuscript Title:** Safety and off-treatment response of patients with chronic hepatitis B virus infection receiving long-term open-label vebicorvir

**Manuscript Number (if known):** [Click or tap here to enter text.](#)

In the interest of transparency, we ask you to disclose all relationships/activities/interests listed below that are related to the content of your manuscript. "Related" means any relation with for-profit or not-for-profit third parties whose interests may be affected by the content of the manuscript. Disclosure represents a commitment to transparency and does not necessarily indicate a bias. If you are in doubt about whether to list a relationship/activity/interest, it is preferable that you do so.

In the interest of transparency, we ask you to disclose all relationships/activities/interests listed below that are related to the content of your manuscript. "Related" means any relation with for-profit or not-for-profit third parties whose interests may be affected by the content of the manuscript. Disclosure represents a commitment to transparency and does not necessarily indicate a bias. If you are in doubt about whether to list a relationship/activity/interest, it is preferable that you do so.

The author's relationships/activities/interests should be defined broadly. For example, if your manuscript pertains to the epidemiology of hypertension, you should declare all relationships with manufacturers of antihypertensive medication, even if that medication is not mentioned in the manuscript.

In item #1 below, report all support for the work reported in this manuscript without time limit. For all other items, the time frame for disclosure is the past 36 months.

|                                                    | Name all entities with whom you have this relationship or indicate none (add rows as needed)                                                                                   | Specifications/Comments (e.g., if payments were made to you or to your institution)                                                                                                                                                                                                                                                                         |                      |                  |  |  |                                           |  |
|----------------------------------------------------|--------------------------------------------------------------------------------------------------------------------------------------------------------------------------------|-------------------------------------------------------------------------------------------------------------------------------------------------------------------------------------------------------------------------------------------------------------------------------------------------------------------------------------------------------------|----------------------|------------------|--|--|-------------------------------------------|--|
| Time frame: Since the initial planning of the work |                                                                                                                                                                                |                                                                                                                                                                                                                                                                                                                                                             |                      |                  |  |  |                                           |  |
| <b>1</b>                                           | All support for the present manuscript (e.g., funding, provision of study materials, medical writing, article processing charges, etc.)<br><b>No time limit for this item.</b> | <input type="checkbox"/> None<br><br><table border="1" style="width: 100%; border-collapse: collapse;"> <tr> <td style="width: 60%;">Assembly Biosciences</td> <td>Current Employee</td> </tr> <tr> <td> </td> <td> </td> </tr> <tr> <td colspan="2" style="text-align: center; color: #ccc;">Click the tab key to add additional rows.</td> </tr> </table> | Assembly Biosciences | Current Employee |  |  | Click the tab key to add additional rows. |  |
| Assembly Biosciences                               | Current Employee                                                                                                                                                               |                                                                                                                                                                                                                                                                                                                                                             |                      |                  |  |  |                                           |  |
|                                                    |                                                                                                                                                                                |                                                                                                                                                                                                                                                                                                                                                             |                      |                  |  |  |                                           |  |
| Click the tab key to add additional rows.          |                                                                                                                                                                                |                                                                                                                                                                                                                                                                                                                                                             |                      |                  |  |  |                                           |  |
| Time frame: past 36 months                         |                                                                                                                                                                                |                                                                                                                                                                                                                                                                                                                                                             |                      |                  |  |  |                                           |  |
| <b>2</b>                                           | Grants or contracts from any entity (if not indicated in item #1 above).                                                                                                       | <input checked="" type="checkbox"/> None<br><br><table border="1" style="width: 100%; border-collapse: collapse;"> <tr> <td style="width: 60%;"> </td> <td> </td> </tr> <tr> <td> </td> <td> </td> </tr> <tr> <td> </td> <td> </td> </tr> </table>                                                                                                          |                      |                  |  |  |                                           |  |
|                                                    |                                                                                                                                                                                |                                                                                                                                                                                                                                                                                                                                                             |                      |                  |  |  |                                           |  |
|                                                    |                                                                                                                                                                                |                                                                                                                                                                                                                                                                                                                                                             |                      |                  |  |  |                                           |  |
|                                                    |                                                                                                                                                                                |                                                                                                                                                                                                                                                                                                                                                             |                      |                  |  |  |                                           |  |

|           |                                                                                                              | Name all entities with whom you have this relationship or indicate none (add rows as needed)                                                                                                                                                                                                                                                                           | Specifications/Comments (e.g., if payments were made to you or to your institution) |  |  |  |  |  |  |  |  |
|-----------|--------------------------------------------------------------------------------------------------------------|------------------------------------------------------------------------------------------------------------------------------------------------------------------------------------------------------------------------------------------------------------------------------------------------------------------------------------------------------------------------|-------------------------------------------------------------------------------------|--|--|--|--|--|--|--|--|
| <b>3</b>  | Royalties or licenses                                                                                        | <input checked="" type="checkbox"/> <b>None</b><br><table border="1" style="width: 100%; border-collapse: collapse;"> <tr><td style="width: 50%; height: 20px;"></td><td style="width: 50%;"></td></tr> <tr><td style="height: 20px;"></td><td></td></tr> <tr><td style="height: 20px;"></td><td></td></tr> </table>                                                   |                                                                                     |  |  |  |  |  |  |  |  |
|           |                                                                                                              |                                                                                                                                                                                                                                                                                                                                                                        |                                                                                     |  |  |  |  |  |  |  |  |
|           |                                                                                                              |                                                                                                                                                                                                                                                                                                                                                                        |                                                                                     |  |  |  |  |  |  |  |  |
|           |                                                                                                              |                                                                                                                                                                                                                                                                                                                                                                        |                                                                                     |  |  |  |  |  |  |  |  |
| <b>4</b>  | Consulting fees                                                                                              | <input checked="" type="checkbox"/> <b>None</b><br><table border="1" style="width: 100%; border-collapse: collapse;"> <tr><td style="width: 50%; height: 20px;"></td><td style="width: 50%;"></td></tr> <tr><td style="height: 20px;"></td><td></td></tr> <tr><td style="height: 20px;"></td><td></td></tr> </table>                                                   |                                                                                     |  |  |  |  |  |  |  |  |
|           |                                                                                                              |                                                                                                                                                                                                                                                                                                                                                                        |                                                                                     |  |  |  |  |  |  |  |  |
|           |                                                                                                              |                                                                                                                                                                                                                                                                                                                                                                        |                                                                                     |  |  |  |  |  |  |  |  |
|           |                                                                                                              |                                                                                                                                                                                                                                                                                                                                                                        |                                                                                     |  |  |  |  |  |  |  |  |
| <b>5</b>  | Payment or honoraria for lectures, presentations, speakers bureaus, manuscript writing or educational events | <input checked="" type="checkbox"/> <b>None</b><br><table border="1" style="width: 100%; border-collapse: collapse;"> <tr><td style="width: 50%; height: 20px;"></td><td style="width: 50%;"></td></tr> <tr><td style="height: 20px;"></td><td></td></tr> <tr><td style="height: 20px;"></td><td></td></tr> <tr><td style="height: 20px;"></td><td></td></tr> </table> |                                                                                     |  |  |  |  |  |  |  |  |
|           |                                                                                                              |                                                                                                                                                                                                                                                                                                                                                                        |                                                                                     |  |  |  |  |  |  |  |  |
|           |                                                                                                              |                                                                                                                                                                                                                                                                                                                                                                        |                                                                                     |  |  |  |  |  |  |  |  |
|           |                                                                                                              |                                                                                                                                                                                                                                                                                                                                                                        |                                                                                     |  |  |  |  |  |  |  |  |
|           |                                                                                                              |                                                                                                                                                                                                                                                                                                                                                                        |                                                                                     |  |  |  |  |  |  |  |  |
| <b>6</b>  | Payment for expert testimony                                                                                 | <input checked="" type="checkbox"/> <b>None</b><br><table border="1" style="width: 100%; border-collapse: collapse;"> <tr><td style="width: 50%; height: 20px;"></td><td style="width: 50%;"></td></tr> <tr><td style="height: 20px;"></td><td></td></tr> <tr><td style="height: 20px;"></td><td></td></tr> </table>                                                   |                                                                                     |  |  |  |  |  |  |  |  |
|           |                                                                                                              |                                                                                                                                                                                                                                                                                                                                                                        |                                                                                     |  |  |  |  |  |  |  |  |
|           |                                                                                                              |                                                                                                                                                                                                                                                                                                                                                                        |                                                                                     |  |  |  |  |  |  |  |  |
|           |                                                                                                              |                                                                                                                                                                                                                                                                                                                                                                        |                                                                                     |  |  |  |  |  |  |  |  |
| <b>7</b>  | Support for attending meetings and/or travel                                                                 | <input checked="" type="checkbox"/> <b>None</b><br><table border="1" style="width: 100%; border-collapse: collapse;"> <tr><td style="width: 50%; height: 20px;"></td><td style="width: 50%;"></td></tr> <tr><td style="height: 20px;"></td><td></td></tr> <tr><td style="height: 20px;"></td><td></td></tr> </table>                                                   |                                                                                     |  |  |  |  |  |  |  |  |
|           |                                                                                                              |                                                                                                                                                                                                                                                                                                                                                                        |                                                                                     |  |  |  |  |  |  |  |  |
|           |                                                                                                              |                                                                                                                                                                                                                                                                                                                                                                        |                                                                                     |  |  |  |  |  |  |  |  |
|           |                                                                                                              |                                                                                                                                                                                                                                                                                                                                                                        |                                                                                     |  |  |  |  |  |  |  |  |
| <b>8</b>  | Patents planned, issued or pending                                                                           | <input checked="" type="checkbox"/> <b>None</b><br><table border="1" style="width: 100%; border-collapse: collapse;"> <tr><td style="width: 50%; height: 20px;"></td><td style="width: 50%;"></td></tr> <tr><td style="height: 20px;"></td><td></td></tr> <tr><td style="height: 20px;"></td><td></td></tr> </table>                                                   |                                                                                     |  |  |  |  |  |  |  |  |
|           |                                                                                                              |                                                                                                                                                                                                                                                                                                                                                                        |                                                                                     |  |  |  |  |  |  |  |  |
|           |                                                                                                              |                                                                                                                                                                                                                                                                                                                                                                        |                                                                                     |  |  |  |  |  |  |  |  |
|           |                                                                                                              |                                                                                                                                                                                                                                                                                                                                                                        |                                                                                     |  |  |  |  |  |  |  |  |
| <b>9</b>  | Participation on a Data Safety Monitoring Board or Advisory Board                                            | <input checked="" type="checkbox"/> <b>None</b><br><table border="1" style="width: 100%; border-collapse: collapse;"> <tr><td style="width: 50%; height: 20px;"></td><td style="width: 50%;"></td></tr> <tr><td style="height: 20px;"></td><td></td></tr> <tr><td style="height: 20px;"></td><td></td></tr> </table>                                                   |                                                                                     |  |  |  |  |  |  |  |  |
|           |                                                                                                              |                                                                                                                                                                                                                                                                                                                                                                        |                                                                                     |  |  |  |  |  |  |  |  |
|           |                                                                                                              |                                                                                                                                                                                                                                                                                                                                                                        |                                                                                     |  |  |  |  |  |  |  |  |
|           |                                                                                                              |                                                                                                                                                                                                                                                                                                                                                                        |                                                                                     |  |  |  |  |  |  |  |  |
| <b>10</b> | Leadership or fiduciary role in other board,                                                                 | <input checked="" type="checkbox"/> <b>None</b><br><table border="1" style="width: 100%; border-collapse: collapse;"> <tr><td style="width: 50%; height: 20px;"></td><td style="width: 50%;"></td></tr> </table>                                                                                                                                                       |                                                                                     |  |  |  |  |  |  |  |  |
|           |                                                                                                              |                                                                                                                                                                                                                                                                                                                                                                        |                                                                                     |  |  |  |  |  |  |  |  |

|                      |                                                                                  | Name all entities with whom you have this relationship or indicate none (add rows as needed)                                                                                                         | Specifications/Comments (e.g., if payments were made to you or to your institution) |                  |  |  |  |  |  |
|----------------------|----------------------------------------------------------------------------------|------------------------------------------------------------------------------------------------------------------------------------------------------------------------------------------------------|-------------------------------------------------------------------------------------|------------------|--|--|--|--|--|
|                      | society, committee or advocacy group, paid or unpaid                             |                                                                                                                                                                                                      |                                                                                     |                  |  |  |  |  |  |
| <b>11</b>            | Stock or stock options                                                           | <input type="checkbox"/> <b>None</b><br><table border="1"> <tr> <td>Assembly Biosciences</td> <td>Holds stock</td> </tr> <tr> <td></td> <td></td> </tr> <tr> <td></td> <td></td> </tr> </table>      | Assembly Biosciences                                                                | Holds stock      |  |  |  |  |  |
| Assembly Biosciences | Holds stock                                                                      |                                                                                                                                                                                                      |                                                                                     |                  |  |  |  |  |  |
|                      |                                                                                  |                                                                                                                                                                                                      |                                                                                     |                  |  |  |  |  |  |
|                      |                                                                                  |                                                                                                                                                                                                      |                                                                                     |                  |  |  |  |  |  |
| <b>12</b>            | Receipt of equipment, materials, drugs, medical writing, gifts or other services | <input checked="" type="checkbox"/> <b>None</b><br><table border="1"> <tr> <td></td> <td></td> </tr> <tr> <td></td> <td></td> </tr> <tr> <td></td> <td></td> </tr> </table>                          |                                                                                     |                  |  |  |  |  |  |
|                      |                                                                                  |                                                                                                                                                                                                      |                                                                                     |                  |  |  |  |  |  |
|                      |                                                                                  |                                                                                                                                                                                                      |                                                                                     |                  |  |  |  |  |  |
|                      |                                                                                  |                                                                                                                                                                                                      |                                                                                     |                  |  |  |  |  |  |
| <b>13</b>            | Other financial or non-financial interests                                       | <input type="checkbox"/> <b>None</b><br><table border="1"> <tr> <td>Assembly Biosciences</td> <td>Current Employee</td> </tr> <tr> <td></td> <td></td> </tr> <tr> <td></td> <td></td> </tr> </table> | Assembly Biosciences                                                                | Current Employee |  |  |  |  |  |
| Assembly Biosciences | Current Employee                                                                 |                                                                                                                                                                                                      |                                                                                     |                  |  |  |  |  |  |
|                      |                                                                                  |                                                                                                                                                                                                      |                                                                                     |                  |  |  |  |  |  |
|                      |                                                                                  |                                                                                                                                                                                                      |                                                                                     |                  |  |  |  |  |  |

Please place an "X" next to the following statement to indicate your agreement:

I certify that I have answered every question and have not altered the wording of any of the questions on this form.

## ICMJE DISCLOSURE FORM

**Date:** 8/7/2023

**Your Name:** Julie Ma

**Manuscript Title:** Safety and off-treatment response of patients with chronic hepatitis B virus infection receiving long-term open-label vebicorvir

**Manuscript Number (if known):** [Click or tap here to enter text.](#)

In the interest of transparency, we ask you to disclose all relationships/activities/interests listed below that are related to the content of your manuscript. "Related" means any relation with for-profit or not-for-profit third parties whose interests may be affected by the content of the manuscript. Disclosure represents a commitment to transparency and does not necessarily indicate a bias. If you are in doubt about whether to list a relationship/activity/interest, it is preferable that you do so.

In the interest of transparency, we ask you to disclose all relationships/activities/interests listed below that are related to the content of your manuscript. "Related" means any relation with for-profit or not-for-profit third parties whose interests may be affected by the content of the manuscript. Disclosure represents a commitment to transparency and does not necessarily indicate a bias. If you are in doubt about whether to list a relationship/activity/interest, it is preferable that you do so.

The author's relationships/activities/interests should be defined broadly. For example, if your manuscript pertains to the epidemiology of hypertension, you should declare all relationships with manufacturers of antihypertensive medication, even if that medication is not mentioned in the manuscript.

In item #1 below, report all support for the work reported in this manuscript without time limit. For all other items, the time frame for disclosure is the past 36 months.

|                                                    | Name all entities with whom you have this relationship or indicate none (add rows as needed)                                                                                   | Specifications/Comments (e.g., if payments were made to you or to your institution)                                                                                                                                                                                                                                                                        |                      |                 |  |  |                                           |  |
|----------------------------------------------------|--------------------------------------------------------------------------------------------------------------------------------------------------------------------------------|------------------------------------------------------------------------------------------------------------------------------------------------------------------------------------------------------------------------------------------------------------------------------------------------------------------------------------------------------------|----------------------|-----------------|--|--|-------------------------------------------|--|
| Time frame: Since the initial planning of the work |                                                                                                                                                                                |                                                                                                                                                                                                                                                                                                                                                            |                      |                 |  |  |                                           |  |
| <b>1</b>                                           | All support for the present manuscript (e.g., funding, provision of study materials, medical writing, article processing charges, etc.)<br><b>No time limit for this item.</b> | <input type="checkbox"/> None<br><br><table border="1" style="width: 100%; border-collapse: collapse;"> <tr> <td style="width: 60%;">Assembly Biosciences</td> <td>Former employee</td> </tr> <tr> <td> </td> <td> </td> </tr> <tr> <td colspan="2" style="text-align: center; color: gray;">Click the tab key to add additional rows.</td> </tr> </table> | Assembly Biosciences | Former employee |  |  | Click the tab key to add additional rows. |  |
| Assembly Biosciences                               | Former employee                                                                                                                                                                |                                                                                                                                                                                                                                                                                                                                                            |                      |                 |  |  |                                           |  |
|                                                    |                                                                                                                                                                                |                                                                                                                                                                                                                                                                                                                                                            |                      |                 |  |  |                                           |  |
| Click the tab key to add additional rows.          |                                                                                                                                                                                |                                                                                                                                                                                                                                                                                                                                                            |                      |                 |  |  |                                           |  |
| Time frame: past 36 months                         |                                                                                                                                                                                |                                                                                                                                                                                                                                                                                                                                                            |                      |                 |  |  |                                           |  |
| <b>2</b>                                           | Grants or contracts from any entity (if not indicated in item #1 above).                                                                                                       | <input checked="" type="checkbox"/> None<br><br><table border="1" style="width: 100%; border-collapse: collapse;"> <tr> <td style="width: 60%;"> </td> <td> </td> </tr> <tr> <td> </td> <td> </td> </tr> <tr> <td> </td> <td> </td> </tr> </table>                                                                                                         |                      |                 |  |  |                                           |  |
|                                                    |                                                                                                                                                                                |                                                                                                                                                                                                                                                                                                                                                            |                      |                 |  |  |                                           |  |
|                                                    |                                                                                                                                                                                |                                                                                                                                                                                                                                                                                                                                                            |                      |                 |  |  |                                           |  |
|                                                    |                                                                                                                                                                                |                                                                                                                                                                                                                                                                                                                                                            |                      |                 |  |  |                                           |  |



|    |                                                                                                              | Name all entities with whom you have this relationship or indicate none (add rows as needed)                                                                                                                                                                                                                                                                           | Specifications/Comments (e.g., if payments were made to you or to your institution) |  |  |  |  |  |  |  |  |
|----|--------------------------------------------------------------------------------------------------------------|------------------------------------------------------------------------------------------------------------------------------------------------------------------------------------------------------------------------------------------------------------------------------------------------------------------------------------------------------------------------|-------------------------------------------------------------------------------------|--|--|--|--|--|--|--|--|
| 3  | Royalties or licenses                                                                                        | <input checked="" type="checkbox"/> <b>None</b><br><table border="1" style="width: 100%; border-collapse: collapse;"> <tr><td style="width: 50%; height: 15px;"></td><td style="width: 50%;"></td></tr> <tr><td style="height: 15px;"></td><td></td></tr> <tr><td style="height: 15px;"></td><td></td></tr> </table>                                                   |                                                                                     |  |  |  |  |  |  |  |  |
|    |                                                                                                              |                                                                                                                                                                                                                                                                                                                                                                        |                                                                                     |  |  |  |  |  |  |  |  |
|    |                                                                                                              |                                                                                                                                                                                                                                                                                                                                                                        |                                                                                     |  |  |  |  |  |  |  |  |
|    |                                                                                                              |                                                                                                                                                                                                                                                                                                                                                                        |                                                                                     |  |  |  |  |  |  |  |  |
| 4  | Consulting fees                                                                                              | <input checked="" type="checkbox"/> <b>None</b><br><table border="1" style="width: 100%; border-collapse: collapse;"> <tr><td style="width: 50%; height: 15px;"></td><td style="width: 50%;"></td></tr> <tr><td style="height: 15px;"></td><td></td></tr> <tr><td style="height: 15px;"></td><td></td></tr> <tr><td style="height: 15px;"></td><td></td></tr> </table> |                                                                                     |  |  |  |  |  |  |  |  |
|    |                                                                                                              |                                                                                                                                                                                                                                                                                                                                                                        |                                                                                     |  |  |  |  |  |  |  |  |
|    |                                                                                                              |                                                                                                                                                                                                                                                                                                                                                                        |                                                                                     |  |  |  |  |  |  |  |  |
|    |                                                                                                              |                                                                                                                                                                                                                                                                                                                                                                        |                                                                                     |  |  |  |  |  |  |  |  |
|    |                                                                                                              |                                                                                                                                                                                                                                                                                                                                                                        |                                                                                     |  |  |  |  |  |  |  |  |
| 5  | Payment or honoraria for lectures, presentations, speakers bureaus, manuscript writing or educational events | <input checked="" type="checkbox"/> <b>None</b><br><table border="1" style="width: 100%; border-collapse: collapse;"> <tr><td style="width: 50%; height: 15px;"></td><td style="width: 50%;"></td></tr> <tr><td style="height: 15px;"></td><td></td></tr> <tr><td style="height: 15px;"></td><td></td></tr> </table>                                                   |                                                                                     |  |  |  |  |  |  |  |  |
|    |                                                                                                              |                                                                                                                                                                                                                                                                                                                                                                        |                                                                                     |  |  |  |  |  |  |  |  |
|    |                                                                                                              |                                                                                                                                                                                                                                                                                                                                                                        |                                                                                     |  |  |  |  |  |  |  |  |
|    |                                                                                                              |                                                                                                                                                                                                                                                                                                                                                                        |                                                                                     |  |  |  |  |  |  |  |  |
| 6  | Payment for expert testimony                                                                                 | <input checked="" type="checkbox"/> <b>None</b><br><table border="1" style="width: 100%; border-collapse: collapse;"> <tr><td style="width: 50%; height: 15px;"></td><td style="width: 50%;"></td></tr> <tr><td style="height: 15px;"></td><td></td></tr> <tr><td style="height: 15px;"></td><td></td></tr> </table>                                                   |                                                                                     |  |  |  |  |  |  |  |  |
|    |                                                                                                              |                                                                                                                                                                                                                                                                                                                                                                        |                                                                                     |  |  |  |  |  |  |  |  |
|    |                                                                                                              |                                                                                                                                                                                                                                                                                                                                                                        |                                                                                     |  |  |  |  |  |  |  |  |
|    |                                                                                                              |                                                                                                                                                                                                                                                                                                                                                                        |                                                                                     |  |  |  |  |  |  |  |  |
| 7  | Support for attending meetings and/or travel                                                                 | <input checked="" type="checkbox"/> <b>None</b><br><table border="1" style="width: 100%; border-collapse: collapse;"> <tr><td style="width: 50%; height: 15px;"></td><td style="width: 50%;"></td></tr> <tr><td style="height: 15px;"></td><td></td></tr> <tr><td style="height: 15px;"></td><td></td></tr> </table>                                                   |                                                                                     |  |  |  |  |  |  |  |  |
|    |                                                                                                              |                                                                                                                                                                                                                                                                                                                                                                        |                                                                                     |  |  |  |  |  |  |  |  |
|    |                                                                                                              |                                                                                                                                                                                                                                                                                                                                                                        |                                                                                     |  |  |  |  |  |  |  |  |
|    |                                                                                                              |                                                                                                                                                                                                                                                                                                                                                                        |                                                                                     |  |  |  |  |  |  |  |  |
| 8  | Patents planned, issued or pending                                                                           | <input checked="" type="checkbox"/> <b>None</b><br><table border="1" style="width: 100%; border-collapse: collapse;"> <tr><td style="width: 50%; height: 15px;"></td><td style="width: 50%;"></td></tr> <tr><td style="height: 15px;"></td><td></td></tr> <tr><td style="height: 15px;"></td><td></td></tr> </table>                                                   |                                                                                     |  |  |  |  |  |  |  |  |
|    |                                                                                                              |                                                                                                                                                                                                                                                                                                                                                                        |                                                                                     |  |  |  |  |  |  |  |  |
|    |                                                                                                              |                                                                                                                                                                                                                                                                                                                                                                        |                                                                                     |  |  |  |  |  |  |  |  |
|    |                                                                                                              |                                                                                                                                                                                                                                                                                                                                                                        |                                                                                     |  |  |  |  |  |  |  |  |
| 9  | Participation on a Data Safety Monitoring Board or Advisory Board                                            | <input checked="" type="checkbox"/> <b>None</b><br><table border="1" style="width: 100%; border-collapse: collapse;"> <tr><td style="width: 50%; height: 15px;"></td><td style="width: 50%;"></td></tr> <tr><td style="height: 15px;"></td><td></td></tr> <tr><td style="height: 15px;"></td><td></td></tr> </table>                                                   |                                                                                     |  |  |  |  |  |  |  |  |
|    |                                                                                                              |                                                                                                                                                                                                                                                                                                                                                                        |                                                                                     |  |  |  |  |  |  |  |  |
|    |                                                                                                              |                                                                                                                                                                                                                                                                                                                                                                        |                                                                                     |  |  |  |  |  |  |  |  |
|    |                                                                                                              |                                                                                                                                                                                                                                                                                                                                                                        |                                                                                     |  |  |  |  |  |  |  |  |
| 10 | Leadership or fiduciary role in other board,                                                                 | <input checked="" type="checkbox"/> <b>None</b><br><table border="1" style="width: 100%; border-collapse: collapse;"> <tr><td style="width: 50%; height: 15px;"></td><td style="width: 50%;"></td></tr> </table>                                                                                                                                                       |                                                                                     |  |  |  |  |  |  |  |  |
|    |                                                                                                              |                                                                                                                                                                                                                                                                                                                                                                        |                                                                                     |  |  |  |  |  |  |  |  |

|                      |                                                                                  | Name all entities with whom you have this relationship or indicate none (add rows as needed)                                                                                                    | Specifications/Comments (e.g., if payments were made to you or to your institution) |             |  |  |  |  |  |
|----------------------|----------------------------------------------------------------------------------|-------------------------------------------------------------------------------------------------------------------------------------------------------------------------------------------------|-------------------------------------------------------------------------------------|-------------|--|--|--|--|--|
|                      | society, committee or advocacy group, paid or unpaid                             |                                                                                                                                                                                                 |                                                                                     |             |  |  |  |  |  |
| <b>11</b>            | Stock or stock options                                                           | <input type="checkbox"/> <b>None</b><br><table border="1"> <tr> <td>Assembly Biosciences</td> <td>Holds stock</td> </tr> <tr> <td></td> <td></td> </tr> <tr> <td></td> <td></td> </tr> </table> | Assembly Biosciences                                                                | Holds stock |  |  |  |  |  |
| Assembly Biosciences | Holds stock                                                                      |                                                                                                                                                                                                 |                                                                                     |             |  |  |  |  |  |
|                      |                                                                                  |                                                                                                                                                                                                 |                                                                                     |             |  |  |  |  |  |
|                      |                                                                                  |                                                                                                                                                                                                 |                                                                                     |             |  |  |  |  |  |
| <b>12</b>            | Receipt of equipment, materials, drugs, medical writing, gifts or other services | <input checked="" type="checkbox"/> <b>None</b><br><table border="1"> <tr> <td></td> <td></td> </tr> <tr> <td></td> <td></td> </tr> <tr> <td></td> <td></td> </tr> </table>                     |                                                                                     |             |  |  |  |  |  |
|                      |                                                                                  |                                                                                                                                                                                                 |                                                                                     |             |  |  |  |  |  |
|                      |                                                                                  |                                                                                                                                                                                                 |                                                                                     |             |  |  |  |  |  |
|                      |                                                                                  |                                                                                                                                                                                                 |                                                                                     |             |  |  |  |  |  |
| <b>13</b>            | Other financial or non-financial interests                                       | <input checked="" type="checkbox"/> <b>None</b><br><table border="1"> <tr> <td></td> <td></td> </tr> <tr> <td></td> <td></td> </tr> <tr> <td></td> <td></td> </tr> </table>                     |                                                                                     |             |  |  |  |  |  |
|                      |                                                                                  |                                                                                                                                                                                                 |                                                                                     |             |  |  |  |  |  |
|                      |                                                                                  |                                                                                                                                                                                                 |                                                                                     |             |  |  |  |  |  |
|                      |                                                                                  |                                                                                                                                                                                                 |                                                                                     |             |  |  |  |  |  |

Please place an "X" next to the following statement to indicate your agreement:

I certify that I have answered every question and have not altered the wording of any of the questions on this form.

## ICMJE DISCLOSURE FORM

**Date:** 8/7/2023

**Your Name:** Steven J Knox

**Manuscript Title:** Safety and off-treatment response of patients with chronic hepatitis B virus infection receiving long-term open-label vebicorvir

**Manuscript Number (if known):** [Click or tap here to enter text.](#)

In the interest of transparency, we ask you to disclose all relationships/activities/interests listed below that are related to the content of your manuscript. "Related" means any relation with for-profit or not-for-profit third parties whose interests may be affected by the content of the manuscript. Disclosure represents a commitment to transparency and does not necessarily indicate a bias. If you are in doubt about whether to list a relationship/activity/interest, it is preferable that you do so.

In the interest of transparency, we ask you to disclose all relationships/activities/interests listed below that are related to the content of your manuscript. "Related" means any relation with for-profit or not-for-profit third parties whose interests may be affected by the content of the manuscript. Disclosure represents a commitment to transparency and does not necessarily indicate a bias. If you are in doubt about whether to list a relationship/activity/interest, it is preferable that you do so.

The author's relationships/activities/interests should be defined broadly. For example, if your manuscript pertains to the epidemiology of hypertension, you should declare all relationships with manufacturers of antihypertensive medication, even if that medication is not mentioned in the manuscript.

In item #1 below, report all support for the work reported in this manuscript without time limit. For all other items, the time frame for disclosure is the past 36 months.

|                                                    | Name all entities with whom you have this relationship or indicate none (add rows as needed)                                                                                   | Specifications/Comments (e.g., if payments were made to you or to your institution)                                                                                                                                                                                                                                                                                   |                      |          |  |  |                                           |  |
|----------------------------------------------------|--------------------------------------------------------------------------------------------------------------------------------------------------------------------------------|-----------------------------------------------------------------------------------------------------------------------------------------------------------------------------------------------------------------------------------------------------------------------------------------------------------------------------------------------------------------------|----------------------|----------|--|--|-------------------------------------------|--|
| Time frame: Since the initial planning of the work |                                                                                                                                                                                |                                                                                                                                                                                                                                                                                                                                                                       |                      |          |  |  |                                           |  |
| <b>1</b>                                           | All support for the present manuscript (e.g., funding, provision of study materials, medical writing, article processing charges, etc.)<br><b>No time limit for this item.</b> | <input type="checkbox"/> None<br><br><table border="1" style="width: 100%; border-collapse: collapse;"> <tr> <td style="width: 60%;">Assembly Biosciences</td> <td>Employee</td> </tr> <tr> <td> </td> <td> </td> </tr> <tr> <td colspan="2" style="text-align: center; color: gray; font-size: small;">Click the tab key to add additional rows.</td> </tr> </table> | Assembly Biosciences | Employee |  |  | Click the tab key to add additional rows. |  |
| Assembly Biosciences                               | Employee                                                                                                                                                                       |                                                                                                                                                                                                                                                                                                                                                                       |                      |          |  |  |                                           |  |
|                                                    |                                                                                                                                                                                |                                                                                                                                                                                                                                                                                                                                                                       |                      |          |  |  |                                           |  |
| Click the tab key to add additional rows.          |                                                                                                                                                                                |                                                                                                                                                                                                                                                                                                                                                                       |                      |          |  |  |                                           |  |
| Time frame: past 36 months                         |                                                                                                                                                                                |                                                                                                                                                                                                                                                                                                                                                                       |                      |          |  |  |                                           |  |
| <b>2</b>                                           | Grants or contracts from any entity (if not indicated in item #1 above).                                                                                                       | <input checked="" type="checkbox"/> None<br><br><table border="1" style="width: 100%; border-collapse: collapse;"> <tr><td> </td></tr> <tr><td> </td></tr> <tr><td> </td></tr> <tr><td> </td></tr> </table>                                                                                                                                                           |                      |          |  |  |                                           |  |
|                                                    |                                                                                                                                                                                |                                                                                                                                                                                                                                                                                                                                                                       |                      |          |  |  |                                           |  |
|                                                    |                                                                                                                                                                                |                                                                                                                                                                                                                                                                                                                                                                       |                      |          |  |  |                                           |  |
|                                                    |                                                                                                                                                                                |                                                                                                                                                                                                                                                                                                                                                                       |                      |          |  |  |                                           |  |
|                                                    |                                                                                                                                                                                |                                                                                                                                                                                                                                                                                                                                                                       |                      |          |  |  |                                           |  |

|          |                                                                                                              | Name all entities with whom you have this relationship or indicate none (add rows as needed)                                                                                                                                                                                                                                                                                                                                                                                                                                 | Specifications/Comments (e.g., if payments were made to you or to your institution) |  |  |  |  |  |  |  |  |  |  |  |  |  |  |
|----------|--------------------------------------------------------------------------------------------------------------|------------------------------------------------------------------------------------------------------------------------------------------------------------------------------------------------------------------------------------------------------------------------------------------------------------------------------------------------------------------------------------------------------------------------------------------------------------------------------------------------------------------------------|-------------------------------------------------------------------------------------|--|--|--|--|--|--|--|--|--|--|--|--|--|--|
| <b>3</b> | Royalties or licenses                                                                                        | <input checked="" type="checkbox"/> <b>None</b><br><table border="1" style="width: 100%; border-collapse: collapse;"> <tr><td style="width: 50%; height: 20px;"></td><td style="width: 50%;"></td></tr> <tr><td style="height: 20px;"></td><td></td></tr> <tr><td style="height: 20px;"></td><td></td></tr> </table>                                                                                                                                                                                                         |                                                                                     |  |  |  |  |  |  |  |  |  |  |  |  |  |  |
|          |                                                                                                              |                                                                                                                                                                                                                                                                                                                                                                                                                                                                                                                              |                                                                                     |  |  |  |  |  |  |  |  |  |  |  |  |  |  |
|          |                                                                                                              |                                                                                                                                                                                                                                                                                                                                                                                                                                                                                                                              |                                                                                     |  |  |  |  |  |  |  |  |  |  |  |  |  |  |
|          |                                                                                                              |                                                                                                                                                                                                                                                                                                                                                                                                                                                                                                                              |                                                                                     |  |  |  |  |  |  |  |  |  |  |  |  |  |  |
| <b>4</b> | Consulting fees                                                                                              | <input checked="" type="checkbox"/> <b>None</b><br><table border="1" style="width: 100%; border-collapse: collapse;"> <tr><td style="width: 50%; height: 20px;"></td><td style="width: 50%;"></td></tr> <tr><td style="height: 20px;"></td><td></td></tr> </table> |                                                                                     |  |  |  |  |  |  |  |  |  |  |  |  |  |  |
|          |                                                                                                              |                                                                                                                                                                                                                                                                                                                                                                                                                                                                                                                              |                                                                                     |  |  |  |  |  |  |  |  |  |  |  |  |  |  |
|          |                                                                                                              |                                                                                                                                                                                                                                                                                                                                                                                                                                                                                                                              |                                                                                     |  |  |  |  |  |  |  |  |  |  |  |  |  |  |
|          |                                                                                                              |                                                                                                                                                                                                                                                                                                                                                                                                                                                                                                                              |                                                                                     |  |  |  |  |  |  |  |  |  |  |  |  |  |  |
|          |                                                                                                              |                                                                                                                                                                                                                                                                                                                                                                                                                                                                                                                              |                                                                                     |  |  |  |  |  |  |  |  |  |  |  |  |  |  |
|          |                                                                                                              |                                                                                                                                                                                                                                                                                                                                                                                                                                                                                                                              |                                                                                     |  |  |  |  |  |  |  |  |  |  |  |  |  |  |
|          |                                                                                                              |                                                                                                                                                                                                                                                                                                                                                                                                                                                                                                                              |                                                                                     |  |  |  |  |  |  |  |  |  |  |  |  |  |  |
|          |                                                                                                              |                                                                                                                                                                                                                                                                                                                                                                                                                                                                                                                              |                                                                                     |  |  |  |  |  |  |  |  |  |  |  |  |  |  |
| <b>5</b> | Payment or honoraria for lectures, presentations, speakers bureaus, manuscript writing or educational events | <input checked="" type="checkbox"/> <b>None</b><br><table border="1" style="width: 100%; border-collapse: collapse;"> <tr><td style="width: 50%; height: 20px;"></td><td style="width: 50%;"></td></tr> <tr><td style="height: 20px;"></td><td></td></tr> </table> |                                                                                     |  |  |  |  |  |  |  |  |  |  |  |  |  |  |
|          |                                                                                                              |                                                                                                                                                                                                                                                                                                                                                                                                                                                                                                                              |                                                                                     |  |  |  |  |  |  |  |  |  |  |  |  |  |  |
|          |                                                                                                              |                                                                                                                                                                                                                                                                                                                                                                                                                                                                                                                              |                                                                                     |  |  |  |  |  |  |  |  |  |  |  |  |  |  |
|          |                                                                                                              |                                                                                                                                                                                                                                                                                                                                                                                                                                                                                                                              |                                                                                     |  |  |  |  |  |  |  |  |  |  |  |  |  |  |
|          |                                                                                                              |                                                                                                                                                                                                                                                                                                                                                                                                                                                                                                                              |                                                                                     |  |  |  |  |  |  |  |  |  |  |  |  |  |  |
|          |                                                                                                              |                                                                                                                                                                                                                                                                                                                                                                                                                                                                                                                              |                                                                                     |  |  |  |  |  |  |  |  |  |  |  |  |  |  |
|          |                                                                                                              |                                                                                                                                                                                                                                                                                                                                                                                                                                                                                                                              |                                                                                     |  |  |  |  |  |  |  |  |  |  |  |  |  |  |
|          |                                                                                                              |                                                                                                                                                                                                                                                                                                                                                                                                                                                                                                                              |                                                                                     |  |  |  |  |  |  |  |  |  |  |  |  |  |  |
| <b>6</b> | Payment for expert testimony                                                                                 | <input checked="" type="checkbox"/> <b>None</b><br><table border="1" style="width: 100%; border-collapse: collapse;"> <tr><td style="width: 50%; height: 20px;"></td><td style="width: 50%;"></td></tr> <tr><td style="height: 20px;"></td><td></td></tr> <tr><td style="height: 20px;"></td><td></td></tr> </table>                                                                                                                                                                                                         |                                                                                     |  |  |  |  |  |  |  |  |  |  |  |  |  |  |
|          |                                                                                                              |                                                                                                                                                                                                                                                                                                                                                                                                                                                                                                                              |                                                                                     |  |  |  |  |  |  |  |  |  |  |  |  |  |  |
|          |                                                                                                              |                                                                                                                                                                                                                                                                                                                                                                                                                                                                                                                              |                                                                                     |  |  |  |  |  |  |  |  |  |  |  |  |  |  |
|          |                                                                                                              |                                                                                                                                                                                                                                                                                                                                                                                                                                                                                                                              |                                                                                     |  |  |  |  |  |  |  |  |  |  |  |  |  |  |
| <b>7</b> | Support for attending meetings and/or travel                                                                 | <input checked="" type="checkbox"/> <b>None</b><br><table border="1" style="width: 100%; border-collapse: collapse;"> <tr><td style="width: 50%; height: 20px;"></td><td style="width: 50%;"></td></tr> <tr><td style="height: 20px;"></td><td></td></tr> <tr><td style="height: 20px;"></td><td></td></tr> </table>                                                                                                                                                                                                         |                                                                                     |  |  |  |  |  |  |  |  |  |  |  |  |  |  |
|          |                                                                                                              |                                                                                                                                                                                                                                                                                                                                                                                                                                                                                                                              |                                                                                     |  |  |  |  |  |  |  |  |  |  |  |  |  |  |
|          |                                                                                                              |                                                                                                                                                                                                                                                                                                                                                                                                                                                                                                                              |                                                                                     |  |  |  |  |  |  |  |  |  |  |  |  |  |  |
|          |                                                                                                              |                                                                                                                                                                                                                                                                                                                                                                                                                                                                                                                              |                                                                                     |  |  |  |  |  |  |  |  |  |  |  |  |  |  |
| <b>8</b> | Patents planned, issued or pending                                                                           | <input checked="" type="checkbox"/> <b>None</b><br><table border="1" style="width: 100%; border-collapse: collapse;"> <tr><td style="width: 50%; height: 20px;"></td><td style="width: 50%;"></td></tr> <tr><td style="height: 20px;"></td><td></td></tr> <tr><td style="height: 20px;"></td><td></td></tr> </table>                                                                                                                                                                                                         |                                                                                     |  |  |  |  |  |  |  |  |  |  |  |  |  |  |
|          |                                                                                                              |                                                                                                                                                                                                                                                                                                                                                                                                                                                                                                                              |                                                                                     |  |  |  |  |  |  |  |  |  |  |  |  |  |  |
|          |                                                                                                              |                                                                                                                                                                                                                                                                                                                                                                                                                                                                                                                              |                                                                                     |  |  |  |  |  |  |  |  |  |  |  |  |  |  |
|          |                                                                                                              |                                                                                                                                                                                                                                                                                                                                                                                                                                                                                                                              |                                                                                     |  |  |  |  |  |  |  |  |  |  |  |  |  |  |
| <b>9</b> | Participation on a Data Safety Monitoring Board or Advisory Board                                            | <input checked="" type="checkbox"/> <b>None</b><br><table border="1" style="width: 100%; border-collapse: collapse;"> <tr><td style="width: 50%; height: 20px;"></td><td style="width: 50%;"></td></tr> <tr><td style="height: 20px;"></td><td></td></tr> <tr><td style="height: 20px;"></td><td></td></tr> <tr><td style="height: 20px;"></td><td></td></tr> </table>                                                                                                                                                       |                                                                                     |  |  |  |  |  |  |  |  |  |  |  |  |  |  |
|          |                                                                                                              |                                                                                                                                                                                                                                                                                                                                                                                                                                                                                                                              |                                                                                     |  |  |  |  |  |  |  |  |  |  |  |  |  |  |
|          |                                                                                                              |                                                                                                                                                                                                                                                                                                                                                                                                                                                                                                                              |                                                                                     |  |  |  |  |  |  |  |  |  |  |  |  |  |  |
|          |                                                                                                              |                                                                                                                                                                                                                                                                                                                                                                                                                                                                                                                              |                                                                                     |  |  |  |  |  |  |  |  |  |  |  |  |  |  |
|          |                                                                                                              |                                                                                                                                                                                                                                                                                                                                                                                                                                                                                                                              |                                                                                     |  |  |  |  |  |  |  |  |  |  |  |  |  |  |

|                      |                                                                                                   | Name all entities with whom you have this relationship or indicate none (add rows as needed)                                                                                                                                                                                                                                  | Specifications/Comments (e.g., if payments were made to you or to your institution) |             |  |  |  |  |  |
|----------------------|---------------------------------------------------------------------------------------------------|-------------------------------------------------------------------------------------------------------------------------------------------------------------------------------------------------------------------------------------------------------------------------------------------------------------------------------|-------------------------------------------------------------------------------------|-------------|--|--|--|--|--|
| <b>10</b>            | Leadership or fiduciary role in other board, society, committee or advocacy group, paid or unpaid | <input checked="" type="checkbox"/> <b>None</b><br><table border="1" style="width: 100%; border-collapse: collapse;"> <tr><td style="width: 50%; height: 20px;"></td><td style="width: 50%;"></td></tr> <tr><td style="height: 20px;"></td><td></td></tr> <tr><td style="height: 20px;"></td><td></td></tr> </table>          |                                                                                     |             |  |  |  |  |  |
|                      |                                                                                                   |                                                                                                                                                                                                                                                                                                                               |                                                                                     |             |  |  |  |  |  |
|                      |                                                                                                   |                                                                                                                                                                                                                                                                                                                               |                                                                                     |             |  |  |  |  |  |
|                      |                                                                                                   |                                                                                                                                                                                                                                                                                                                               |                                                                                     |             |  |  |  |  |  |
| <b>11</b>            | Stock or stock options                                                                            | <input type="checkbox"/> <b>None</b><br><table border="1" style="width: 100%; border-collapse: collapse;"> <tr> <td style="width: 50%;">Assembly Biosciences</td> <td style="width: 50%;">Holds Stock</td> </tr> <tr><td style="height: 20px;"></td><td></td></tr> <tr><td style="height: 20px;"></td><td></td></tr> </table> | Assembly Biosciences                                                                | Holds Stock |  |  |  |  |  |
| Assembly Biosciences | Holds Stock                                                                                       |                                                                                                                                                                                                                                                                                                                               |                                                                                     |             |  |  |  |  |  |
|                      |                                                                                                   |                                                                                                                                                                                                                                                                                                                               |                                                                                     |             |  |  |  |  |  |
|                      |                                                                                                   |                                                                                                                                                                                                                                                                                                                               |                                                                                     |             |  |  |  |  |  |
| <b>12</b>            | Receipt of equipment, materials, drugs, medical writing, gifts or other services                  | <input checked="" type="checkbox"/> <b>None</b><br><table border="1" style="width: 100%; border-collapse: collapse;"> <tr><td style="width: 50%; height: 20px;"></td><td style="width: 50%;"></td></tr> <tr><td style="height: 20px;"></td><td></td></tr> <tr><td style="height: 20px;"></td><td></td></tr> </table>          |                                                                                     |             |  |  |  |  |  |
|                      |                                                                                                   |                                                                                                                                                                                                                                                                                                                               |                                                                                     |             |  |  |  |  |  |
|                      |                                                                                                   |                                                                                                                                                                                                                                                                                                                               |                                                                                     |             |  |  |  |  |  |
|                      |                                                                                                   |                                                                                                                                                                                                                                                                                                                               |                                                                                     |             |  |  |  |  |  |
| <b>13</b>            | Other financial or non-financial interests                                                        | <input checked="" type="checkbox"/> <b>None</b><br><table border="1" style="width: 100%; border-collapse: collapse;"> <tr><td style="width: 50%; height: 20px;"></td><td style="width: 50%;"></td></tr> <tr><td style="height: 20px;"></td><td></td></tr> <tr><td style="height: 20px;"></td><td></td></tr> </table>          |                                                                                     |             |  |  |  |  |  |
|                      |                                                                                                   |                                                                                                                                                                                                                                                                                                                               |                                                                                     |             |  |  |  |  |  |
|                      |                                                                                                   |                                                                                                                                                                                                                                                                                                                               |                                                                                     |             |  |  |  |  |  |
|                      |                                                                                                   |                                                                                                                                                                                                                                                                                                                               |                                                                                     |             |  |  |  |  |  |

**Please place an "X" next to the following statement to indicate your agreement:**

I certify that I have answered every question and have not altered the wording of any of the questions on this form.

## ICMJE DISCLOSURE FORM

**Date:** 8/7/2023

**Your Name:** Luisa M Stamm

**Manuscript Title:** Safety and off-treatment response of patients with chronic hepatitis B virus infection receiving long-term open-label vebicorvir

**Manuscript Number (if known):** [Click or tap here to enter text.](#)

In the interest of transparency, we ask you to disclose all relationships/activities/interests listed below that are related to the content of your manuscript. "Related" means any relation with for-profit or not-for-profit third parties whose interests may be affected by the content of the manuscript. Disclosure represents a commitment to transparency and does not necessarily indicate a bias. If you are in doubt about whether to list a relationship/activity/interest, it is preferable that you do so.

In the interest of transparency, we ask you to disclose all relationships/activities/interests listed below that are related to the content of your manuscript. "Related" means any relation with for-profit or not-for-profit third parties whose interests may be affected by the content of the manuscript. Disclosure represents a commitment to transparency and does not necessarily indicate a bias. If you are in doubt about whether to list a relationship/activity/interest, it is preferable that you do so.

The author's relationships/activities/interests should be defined broadly. For example, if your manuscript pertains to the epidemiology of hypertension, you should declare all relationships with manufacturers of antihypertensive medication, even if that medication is not mentioned in the manuscript.

In item #1 below, report all support for the work reported in this manuscript without time limit. For all other items, the time frame for disclosure is the past 36 months.

|                                                    | Name all entities with whom you have this relationship or indicate none (add rows as needed)                                                                                   | Specifications/Comments (e.g., if payments were made to you or to your institution)                                                                                                                                                                                                                                                                        |                      |                 |  |  |                                           |  |
|----------------------------------------------------|--------------------------------------------------------------------------------------------------------------------------------------------------------------------------------|------------------------------------------------------------------------------------------------------------------------------------------------------------------------------------------------------------------------------------------------------------------------------------------------------------------------------------------------------------|----------------------|-----------------|--|--|-------------------------------------------|--|
| Time frame: Since the initial planning of the work |                                                                                                                                                                                |                                                                                                                                                                                                                                                                                                                                                            |                      |                 |  |  |                                           |  |
| <b>1</b>                                           | All support for the present manuscript (e.g., funding, provision of study materials, medical writing, article processing charges, etc.)<br><b>No time limit for this item.</b> | <input type="checkbox"/> None<br><br><table border="1" style="width: 100%; border-collapse: collapse;"> <tr> <td style="width: 60%;">Assembly Biosciences</td> <td>Former employee</td> </tr> <tr> <td> </td> <td> </td> </tr> <tr> <td colspan="2" style="text-align: center; color: #ccc;">Click the tab key to add additional rows.</td> </tr> </table> | Assembly Biosciences | Former employee |  |  | Click the tab key to add additional rows. |  |
| Assembly Biosciences                               | Former employee                                                                                                                                                                |                                                                                                                                                                                                                                                                                                                                                            |                      |                 |  |  |                                           |  |
|                                                    |                                                                                                                                                                                |                                                                                                                                                                                                                                                                                                                                                            |                      |                 |  |  |                                           |  |
| Click the tab key to add additional rows.          |                                                                                                                                                                                |                                                                                                                                                                                                                                                                                                                                                            |                      |                 |  |  |                                           |  |
| Time frame: past 36 months                         |                                                                                                                                                                                |                                                                                                                                                                                                                                                                                                                                                            |                      |                 |  |  |                                           |  |
| <b>2</b>                                           | Grants or contracts from any entity (if not indicated in item #1 above).                                                                                                       | <input checked="" type="checkbox"/> None<br><br><table border="1" style="width: 100%; border-collapse: collapse;"> <tr> <td style="width: 60%;"> </td> <td> </td> </tr> <tr> <td> </td> <td> </td> </tr> <tr> <td> </td> <td> </td> </tr> </table>                                                                                                         |                      |                 |  |  |                                           |  |
|                                                    |                                                                                                                                                                                |                                                                                                                                                                                                                                                                                                                                                            |                      |                 |  |  |                                           |  |
|                                                    |                                                                                                                                                                                |                                                                                                                                                                                                                                                                                                                                                            |                      |                 |  |  |                                           |  |
|                                                    |                                                                                                                                                                                |                                                                                                                                                                                                                                                                                                                                                            |                      |                 |  |  |                                           |  |

|           |                                                                                                              | Name all entities with whom you have this relationship or indicate none (add rows as needed)                                                                                                                                                                                                                                                                           | Specifications/Comments (e.g., if payments were made to you or to your institution) |  |  |  |  |  |  |  |  |
|-----------|--------------------------------------------------------------------------------------------------------------|------------------------------------------------------------------------------------------------------------------------------------------------------------------------------------------------------------------------------------------------------------------------------------------------------------------------------------------------------------------------|-------------------------------------------------------------------------------------|--|--|--|--|--|--|--|--|
| <b>3</b>  | Royalties or licenses                                                                                        | <input checked="" type="checkbox"/> <b>None</b><br><table border="1" style="width: 100%; border-collapse: collapse;"> <tr><td style="width: 50%; height: 20px;"></td><td style="width: 50%;"></td></tr> <tr><td style="height: 20px;"></td><td></td></tr> <tr><td style="height: 20px;"></td><td></td></tr> </table>                                                   |                                                                                     |  |  |  |  |  |  |  |  |
|           |                                                                                                              |                                                                                                                                                                                                                                                                                                                                                                        |                                                                                     |  |  |  |  |  |  |  |  |
|           |                                                                                                              |                                                                                                                                                                                                                                                                                                                                                                        |                                                                                     |  |  |  |  |  |  |  |  |
|           |                                                                                                              |                                                                                                                                                                                                                                                                                                                                                                        |                                                                                     |  |  |  |  |  |  |  |  |
| <b>4</b>  | Consulting fees                                                                                              | <input checked="" type="checkbox"/> <b>None</b><br><table border="1" style="width: 100%; border-collapse: collapse;"> <tr><td style="width: 50%; height: 20px;"></td><td style="width: 50%;"></td></tr> <tr><td style="height: 20px;"></td><td></td></tr> <tr><td style="height: 20px;"></td><td></td></tr> <tr><td style="height: 20px;"></td><td></td></tr> </table> |                                                                                     |  |  |  |  |  |  |  |  |
|           |                                                                                                              |                                                                                                                                                                                                                                                                                                                                                                        |                                                                                     |  |  |  |  |  |  |  |  |
|           |                                                                                                              |                                                                                                                                                                                                                                                                                                                                                                        |                                                                                     |  |  |  |  |  |  |  |  |
|           |                                                                                                              |                                                                                                                                                                                                                                                                                                                                                                        |                                                                                     |  |  |  |  |  |  |  |  |
|           |                                                                                                              |                                                                                                                                                                                                                                                                                                                                                                        |                                                                                     |  |  |  |  |  |  |  |  |
| <b>5</b>  | Payment or honoraria for lectures, presentations, speakers bureaus, manuscript writing or educational events | <input checked="" type="checkbox"/> <b>None</b><br><table border="1" style="width: 100%; border-collapse: collapse;"> <tr><td style="width: 50%; height: 20px;"></td><td style="width: 50%;"></td></tr> <tr><td style="height: 20px;"></td><td></td></tr> <tr><td style="height: 20px;"></td><td></td></tr> </table>                                                   |                                                                                     |  |  |  |  |  |  |  |  |
|           |                                                                                                              |                                                                                                                                                                                                                                                                                                                                                                        |                                                                                     |  |  |  |  |  |  |  |  |
|           |                                                                                                              |                                                                                                                                                                                                                                                                                                                                                                        |                                                                                     |  |  |  |  |  |  |  |  |
|           |                                                                                                              |                                                                                                                                                                                                                                                                                                                                                                        |                                                                                     |  |  |  |  |  |  |  |  |
| <b>6</b>  | Payment for expert testimony                                                                                 | <input checked="" type="checkbox"/> <b>None</b><br><table border="1" style="width: 100%; border-collapse: collapse;"> <tr><td style="width: 50%; height: 20px;"></td><td style="width: 50%;"></td></tr> <tr><td style="height: 20px;"></td><td></td></tr> <tr><td style="height: 20px;"></td><td></td></tr> </table>                                                   |                                                                                     |  |  |  |  |  |  |  |  |
|           |                                                                                                              |                                                                                                                                                                                                                                                                                                                                                                        |                                                                                     |  |  |  |  |  |  |  |  |
|           |                                                                                                              |                                                                                                                                                                                                                                                                                                                                                                        |                                                                                     |  |  |  |  |  |  |  |  |
|           |                                                                                                              |                                                                                                                                                                                                                                                                                                                                                                        |                                                                                     |  |  |  |  |  |  |  |  |
| <b>7</b>  | Support for attending meetings and/or travel                                                                 | <input checked="" type="checkbox"/> <b>None</b><br><table border="1" style="width: 100%; border-collapse: collapse;"> <tr><td style="width: 50%; height: 20px;"></td><td style="width: 50%;"></td></tr> <tr><td style="height: 20px;"></td><td></td></tr> <tr><td style="height: 20px;"></td><td></td></tr> </table>                                                   |                                                                                     |  |  |  |  |  |  |  |  |
|           |                                                                                                              |                                                                                                                                                                                                                                                                                                                                                                        |                                                                                     |  |  |  |  |  |  |  |  |
|           |                                                                                                              |                                                                                                                                                                                                                                                                                                                                                                        |                                                                                     |  |  |  |  |  |  |  |  |
|           |                                                                                                              |                                                                                                                                                                                                                                                                                                                                                                        |                                                                                     |  |  |  |  |  |  |  |  |
| <b>8</b>  | Patents planned, issued or pending                                                                           | <input checked="" type="checkbox"/> <b>None</b><br><table border="1" style="width: 100%; border-collapse: collapse;"> <tr><td style="width: 50%; height: 20px;"></td><td style="width: 50%;"></td></tr> <tr><td style="height: 20px;"></td><td></td></tr> <tr><td style="height: 20px;"></td><td></td></tr> </table>                                                   |                                                                                     |  |  |  |  |  |  |  |  |
|           |                                                                                                              |                                                                                                                                                                                                                                                                                                                                                                        |                                                                                     |  |  |  |  |  |  |  |  |
|           |                                                                                                              |                                                                                                                                                                                                                                                                                                                                                                        |                                                                                     |  |  |  |  |  |  |  |  |
|           |                                                                                                              |                                                                                                                                                                                                                                                                                                                                                                        |                                                                                     |  |  |  |  |  |  |  |  |
| <b>9</b>  | Participation on a Data Safety Monitoring Board or Advisory Board                                            | <input checked="" type="checkbox"/> <b>None</b><br><table border="1" style="width: 100%; border-collapse: collapse;"> <tr><td style="width: 50%; height: 20px;"></td><td style="width: 50%;"></td></tr> <tr><td style="height: 20px;"></td><td></td></tr> <tr><td style="height: 20px;"></td><td></td></tr> </table>                                                   |                                                                                     |  |  |  |  |  |  |  |  |
|           |                                                                                                              |                                                                                                                                                                                                                                                                                                                                                                        |                                                                                     |  |  |  |  |  |  |  |  |
|           |                                                                                                              |                                                                                                                                                                                                                                                                                                                                                                        |                                                                                     |  |  |  |  |  |  |  |  |
|           |                                                                                                              |                                                                                                                                                                                                                                                                                                                                                                        |                                                                                     |  |  |  |  |  |  |  |  |
| <b>10</b> | Leadership or fiduciary role in other board,                                                                 | <input checked="" type="checkbox"/> <b>None</b><br><table border="1" style="width: 100%; border-collapse: collapse;"> <tr><td style="width: 50%; height: 20px;"></td><td style="width: 50%;"></td></tr> </table>                                                                                                                                                       |                                                                                     |  |  |  |  |  |  |  |  |
|           |                                                                                                              |                                                                                                                                                                                                                                                                                                                                                                        |                                                                                     |  |  |  |  |  |  |  |  |

|                      |                                                                                  | Name all entities with whom you have this relationship or indicate none (add rows as needed)                                                                                                    | Specifications/Comments (e.g., if payments were made to you or to your institution) |             |  |  |  |  |  |
|----------------------|----------------------------------------------------------------------------------|-------------------------------------------------------------------------------------------------------------------------------------------------------------------------------------------------|-------------------------------------------------------------------------------------|-------------|--|--|--|--|--|
|                      | society, committee or advocacy group, paid or unpaid                             |                                                                                                                                                                                                 |                                                                                     |             |  |  |  |  |  |
| <b>11</b>            | Stock or stock options                                                           | <input type="checkbox"/> <b>None</b><br><table border="1"> <tr> <td>Assembly Biosciences</td> <td>Holds stock</td> </tr> <tr> <td></td> <td></td> </tr> <tr> <td></td> <td></td> </tr> </table> | Assembly Biosciences                                                                | Holds stock |  |  |  |  |  |
| Assembly Biosciences | Holds stock                                                                      |                                                                                                                                                                                                 |                                                                                     |             |  |  |  |  |  |
|                      |                                                                                  |                                                                                                                                                                                                 |                                                                                     |             |  |  |  |  |  |
|                      |                                                                                  |                                                                                                                                                                                                 |                                                                                     |             |  |  |  |  |  |
| <b>12</b>            | Receipt of equipment, materials, drugs, medical writing, gifts or other services | <input checked="" type="checkbox"/> <b>None</b><br><table border="1"> <tr> <td></td> <td></td> </tr> <tr> <td></td> <td></td> </tr> <tr> <td></td> <td></td> </tr> </table>                     |                                                                                     |             |  |  |  |  |  |
|                      |                                                                                  |                                                                                                                                                                                                 |                                                                                     |             |  |  |  |  |  |
|                      |                                                                                  |                                                                                                                                                                                                 |                                                                                     |             |  |  |  |  |  |
|                      |                                                                                  |                                                                                                                                                                                                 |                                                                                     |             |  |  |  |  |  |
| <b>13</b>            | Other financial or non-financial interests                                       | <input checked="" type="checkbox"/> <b>None</b><br><table border="1"> <tr> <td></td> <td></td> </tr> <tr> <td></td> <td></td> </tr> <tr> <td></td> <td></td> </tr> </table>                     |                                                                                     |             |  |  |  |  |  |
|                      |                                                                                  |                                                                                                                                                                                                 |                                                                                     |             |  |  |  |  |  |
|                      |                                                                                  |                                                                                                                                                                                                 |                                                                                     |             |  |  |  |  |  |
|                      |                                                                                  |                                                                                                                                                                                                 |                                                                                     |             |  |  |  |  |  |

Please place an "X" next to the following statement to indicate your agreement:

I certify that I have answered every question and have not altered the wording of any of the questions on this form.



## ICMJE DISCLOSURE FORM

**Date:** 8/7/2023

**Your Name:** Maurizio Bonacini

**Manuscript Title:** Safety and off-treatment response of patients with chronic hepatitis B virus infection receiving long-term open-label vebicorvir

**Manuscript Number (if known):** [Click or tap here to enter text.](#)

In the interest of transparency, we ask you to disclose all relationships/activities/interests listed below that are related to the content of your manuscript. "Related" means any relation with for-profit or not-for-profit third parties whose interests may be affected by the content of the manuscript. Disclosure represents a commitment to transparency and does not necessarily indicate a bias. If you are in doubt about whether to list a relationship/activity/interest, it is preferable that you do so.

In the interest of transparency, we ask you to disclose all relationships/activities/interests listed below that are related to the content of your manuscript. "Related" means any relation with for-profit or not-for-profit third parties whose interests may be affected by the content of the manuscript. Disclosure represents a commitment to transparency and does not necessarily indicate a bias. If you are in doubt about whether to list a relationship/activity/interest, it is preferable that you do so.

The author's relationships/activities/interests should be defined broadly. For example, if your manuscript pertains to the epidemiology of hypertension, you should declare all relationships with manufacturers of antihypertensive medication, even if that medication is not mentioned in the manuscript.

In item #1 below, report all support for the work reported in this manuscript without time limit. For all other items, the time frame for disclosure is the past 36 months.

|                                                    | Name all entities with whom you have this relationship or indicate none (add rows as needed)                                                                                   | Specifications/Comments (e.g., if payments were made to you or to your institution)                                                                                                                                                                                                                                                                                                                                                                                              |                      |                           |                      |                 |                           |                                           |                     |  |
|----------------------------------------------------|--------------------------------------------------------------------------------------------------------------------------------------------------------------------------------|----------------------------------------------------------------------------------------------------------------------------------------------------------------------------------------------------------------------------------------------------------------------------------------------------------------------------------------------------------------------------------------------------------------------------------------------------------------------------------|----------------------|---------------------------|----------------------|-----------------|---------------------------|-------------------------------------------|---------------------|--|
| Time frame: Since the initial planning of the work |                                                                                                                                                                                |                                                                                                                                                                                                                                                                                                                                                                                                                                                                                  |                      |                           |                      |                 |                           |                                           |                     |  |
| <b>1</b>                                           | All support for the present manuscript (e.g., funding, provision of study materials, medical writing, article processing charges, etc.)<br><b>No time limit for this item.</b> | <input checked="" type="checkbox"/> <b>None</b><br><table border="1" style="width: 100%; border-collapse: collapse; margin-top: 5px;"> <tr><td style="height: 15px;"> </td><td style="width: 100px;"> </td></tr> <tr><td style="height: 15px;"> </td><td> </td></tr> <tr><td style="height: 15px;"> </td><td style="text-align: right; font-size: small;">Click the tab key to add additional rows.</td></tr> </table>                                                           |                      |                           |                      |                 |                           | Click the tab key to add additional rows. |                     |  |
|                                                    |                                                                                                                                                                                |                                                                                                                                                                                                                                                                                                                                                                                                                                                                                  |                      |                           |                      |                 |                           |                                           |                     |  |
|                                                    |                                                                                                                                                                                |                                                                                                                                                                                                                                                                                                                                                                                                                                                                                  |                      |                           |                      |                 |                           |                                           |                     |  |
|                                                    | Click the tab key to add additional rows.                                                                                                                                      |                                                                                                                                                                                                                                                                                                                                                                                                                                                                                  |                      |                           |                      |                 |                           |                                           |                     |  |
| Time frame: past 36 months                         |                                                                                                                                                                                |                                                                                                                                                                                                                                                                                                                                                                                                                                                                                  |                      |                           |                      |                 |                           |                                           |                     |  |
| <b>2</b>                                           | Grants or contracts from any entity (if not indicated in item #1 above).                                                                                                       | <input type="checkbox"/> <b>None</b><br><table border="1" style="width: 100%; border-collapse: collapse; margin-top: 5px;"> <tr><td style="width: 60%;">Assembly Biosciences</td><td rowspan="5" style="vertical-align: top;">Received research support</td></tr> <tr><td>Boehringer Ingelheim</td></tr> <tr><td>Gilead Sciences</td></tr> <tr><td>Intercept Pharmaceuticals</td></tr> <tr><td>Inventiva Inc.</td></tr> <tr><td>Viking Therapeutics</td><td> </td></tr> </table> | Assembly Biosciences | Received research support | Boehringer Ingelheim | Gilead Sciences | Intercept Pharmaceuticals | Inventiva Inc.                            | Viking Therapeutics |  |
| Assembly Biosciences                               | Received research support                                                                                                                                                      |                                                                                                                                                                                                                                                                                                                                                                                                                                                                                  |                      |                           |                      |                 |                           |                                           |                     |  |
| Boehringer Ingelheim                               |                                                                                                                                                                                |                                                                                                                                                                                                                                                                                                                                                                                                                                                                                  |                      |                           |                      |                 |                           |                                           |                     |  |
| Gilead Sciences                                    |                                                                                                                                                                                |                                                                                                                                                                                                                                                                                                                                                                                                                                                                                  |                      |                           |                      |                 |                           |                                           |                     |  |
| Intercept Pharmaceuticals                          |                                                                                                                                                                                |                                                                                                                                                                                                                                                                                                                                                                                                                                                                                  |                      |                           |                      |                 |                           |                                           |                     |  |
| Inventiva Inc.                                     |                                                                                                                                                                                |                                                                                                                                                                                                                                                                                                                                                                                                                                                                                  |                      |                           |                      |                 |                           |                                           |                     |  |
| Viking Therapeutics                                |                                                                                                                                                                                |                                                                                                                                                                                                                                                                                                                                                                                                                                                                                  |                      |                           |                      |                 |                           |                                           |                     |  |

|                           |                                                                                                              | Name all entities with whom you have this relationship or indicate none (add rows as needed)                                                                                                                                                                                                                                                                                                               | Specifications/Comments (e.g., if payments were made to you or to your institution) |                               |                 |                           |  |  |  |
|---------------------------|--------------------------------------------------------------------------------------------------------------|------------------------------------------------------------------------------------------------------------------------------------------------------------------------------------------------------------------------------------------------------------------------------------------------------------------------------------------------------------------------------------------------------------|-------------------------------------------------------------------------------------|-------------------------------|-----------------|---------------------------|--|--|--|
| 3                         | Royalties or licenses                                                                                        | <input checked="" type="checkbox"/> <b>None</b><br><table border="1" style="width: 100%; border-collapse: collapse;"> <tr><td style="width: 50%; height: 15px;"></td><td style="width: 50%; height: 15px;"></td></tr> <tr><td style="height: 15px;"></td><td style="height: 15px;"></td></tr> <tr><td style="height: 15px;"></td><td style="height: 15px;"></td></tr> </table>                             |                                                                                     |                               |                 |                           |  |  |  |
|                           |                                                                                                              |                                                                                                                                                                                                                                                                                                                                                                                                            |                                                                                     |                               |                 |                           |  |  |  |
|                           |                                                                                                              |                                                                                                                                                                                                                                                                                                                                                                                                            |                                                                                     |                               |                 |                           |  |  |  |
|                           |                                                                                                              |                                                                                                                                                                                                                                                                                                                                                                                                            |                                                                                     |                               |                 |                           |  |  |  |
| 4                         | Consulting fees                                                                                              | <input checked="" type="checkbox"/> <b>None</b><br><table border="1" style="width: 100%; border-collapse: collapse;"> <tr><td style="width: 50%; height: 15px;"></td><td style="width: 50%; height: 15px;"></td></tr> <tr><td style="height: 15px;"></td><td style="height: 15px;"></td></tr> <tr><td style="height: 15px;"></td><td style="height: 15px;"></td></tr> </table>                             |                                                                                     |                               |                 |                           |  |  |  |
|                           |                                                                                                              |                                                                                                                                                                                                                                                                                                                                                                                                            |                                                                                     |                               |                 |                           |  |  |  |
|                           |                                                                                                              |                                                                                                                                                                                                                                                                                                                                                                                                            |                                                                                     |                               |                 |                           |  |  |  |
|                           |                                                                                                              |                                                                                                                                                                                                                                                                                                                                                                                                            |                                                                                     |                               |                 |                           |  |  |  |
| 5                         | Payment or honoraria for lectures, presentations, speakers bureaus, manuscript writing or educational events | <input type="checkbox"/> <b>None</b><br><table border="1" style="width: 100%; border-collapse: collapse;"> <tr> <td style="width: 50%; height: 15px;">AbbVie</td> <td rowspan="3" style="width: 50%; vertical-align: top;">Member of the speaking bureau</td> </tr> <tr> <td style="height: 15px;">Gilead Sciences</td> </tr> <tr> <td style="height: 15px;">Intercept Pharmaceuticals</td> </tr> </table> | AbbVie                                                                              | Member of the speaking bureau | Gilead Sciences | Intercept Pharmaceuticals |  |  |  |
| AbbVie                    | Member of the speaking bureau                                                                                |                                                                                                                                                                                                                                                                                                                                                                                                            |                                                                                     |                               |                 |                           |  |  |  |
| Gilead Sciences           |                                                                                                              |                                                                                                                                                                                                                                                                                                                                                                                                            |                                                                                     |                               |                 |                           |  |  |  |
| Intercept Pharmaceuticals |                                                                                                              |                                                                                                                                                                                                                                                                                                                                                                                                            |                                                                                     |                               |                 |                           |  |  |  |
| 6                         | Payment for expert testimony                                                                                 | <input checked="" type="checkbox"/> <b>None</b><br><table border="1" style="width: 100%; border-collapse: collapse;"> <tr><td style="width: 50%; height: 15px;"></td><td style="width: 50%; height: 15px;"></td></tr> <tr><td style="height: 15px;"></td><td style="height: 15px;"></td></tr> <tr><td style="height: 15px;"></td><td style="height: 15px;"></td></tr> </table>                             |                                                                                     |                               |                 |                           |  |  |  |
|                           |                                                                                                              |                                                                                                                                                                                                                                                                                                                                                                                                            |                                                                                     |                               |                 |                           |  |  |  |
|                           |                                                                                                              |                                                                                                                                                                                                                                                                                                                                                                                                            |                                                                                     |                               |                 |                           |  |  |  |
|                           |                                                                                                              |                                                                                                                                                                                                                                                                                                                                                                                                            |                                                                                     |                               |                 |                           |  |  |  |
| 7                         | Support for attending meetings and/or travel                                                                 | <input checked="" type="checkbox"/> <b>None</b><br><table border="1" style="width: 100%; border-collapse: collapse;"> <tr><td style="width: 50%; height: 15px;"></td><td style="width: 50%; height: 15px;"></td></tr> <tr><td style="height: 15px;"></td><td style="height: 15px;"></td></tr> <tr><td style="height: 15px;"></td><td style="height: 15px;"></td></tr> </table>                             |                                                                                     |                               |                 |                           |  |  |  |
|                           |                                                                                                              |                                                                                                                                                                                                                                                                                                                                                                                                            |                                                                                     |                               |                 |                           |  |  |  |
|                           |                                                                                                              |                                                                                                                                                                                                                                                                                                                                                                                                            |                                                                                     |                               |                 |                           |  |  |  |
|                           |                                                                                                              |                                                                                                                                                                                                                                                                                                                                                                                                            |                                                                                     |                               |                 |                           |  |  |  |
| 8                         | Patents planned, issued or pending                                                                           | <input checked="" type="checkbox"/> <b>None</b><br><table border="1" style="width: 100%; border-collapse: collapse;"> <tr><td style="width: 50%; height: 15px;"></td><td style="width: 50%; height: 15px;"></td></tr> <tr><td style="height: 15px;"></td><td style="height: 15px;"></td></tr> <tr><td style="height: 15px;"></td><td style="height: 15px;"></td></tr> </table>                             |                                                                                     |                               |                 |                           |  |  |  |
|                           |                                                                                                              |                                                                                                                                                                                                                                                                                                                                                                                                            |                                                                                     |                               |                 |                           |  |  |  |
|                           |                                                                                                              |                                                                                                                                                                                                                                                                                                                                                                                                            |                                                                                     |                               |                 |                           |  |  |  |
|                           |                                                                                                              |                                                                                                                                                                                                                                                                                                                                                                                                            |                                                                                     |                               |                 |                           |  |  |  |
| 9                         | Participation on a Data Safety Monitoring Board or Advisory Board                                            | <input checked="" type="checkbox"/> <b>None</b><br><table border="1" style="width: 100%; border-collapse: collapse;"> <tr><td style="width: 50%; height: 15px;"></td><td style="width: 50%; height: 15px;"></td></tr> <tr><td style="height: 15px;"></td><td style="height: 15px;"></td></tr> <tr><td style="height: 15px;"></td><td style="height: 15px;"></td></tr> </table>                             |                                                                                     |                               |                 |                           |  |  |  |
|                           |                                                                                                              |                                                                                                                                                                                                                                                                                                                                                                                                            |                                                                                     |                               |                 |                           |  |  |  |
|                           |                                                                                                              |                                                                                                                                                                                                                                                                                                                                                                                                            |                                                                                     |                               |                 |                           |  |  |  |
|                           |                                                                                                              |                                                                                                                                                                                                                                                                                                                                                                                                            |                                                                                     |                               |                 |                           |  |  |  |
| 10                        | Leadership or fiduciary role in other board,                                                                 | <input checked="" type="checkbox"/> <b>None</b><br><table border="1" style="width: 100%; border-collapse: collapse;"> <tr><td style="width: 50%; height: 15px;"></td><td style="width: 50%; height: 15px;"></td></tr> </table>                                                                                                                                                                             |                                                                                     |                               |                 |                           |  |  |  |
|                           |                                                                                                              |                                                                                                                                                                                                                                                                                                                                                                                                            |                                                                                     |                               |                 |                           |  |  |  |

|           |                                                                                  | Name all entities with whom you have this relationship or indicate none (add rows as needed) | Specifications/Comments (e.g., if payments were made to you or to your institution) |
|-----------|----------------------------------------------------------------------------------|----------------------------------------------------------------------------------------------|-------------------------------------------------------------------------------------|
|           | society, committee or advocacy group, paid or unpaid                             |                                                                                              |                                                                                     |
| <b>11</b> | Stock or stock options                                                           | <input checked="" type="checkbox"/> <b>None</b>                                              |                                                                                     |
|           |                                                                                  |                                                                                              |                                                                                     |
|           |                                                                                  |                                                                                              |                                                                                     |
| <b>12</b> | Receipt of equipment, materials, drugs, medical writing, gifts or other services | <input checked="" type="checkbox"/> <b>None</b>                                              |                                                                                     |
|           |                                                                                  |                                                                                              |                                                                                     |
|           |                                                                                  |                                                                                              |                                                                                     |
| <b>13</b> | Other financial or non-financial interests                                       | <input checked="" type="checkbox"/> <b>None</b>                                              |                                                                                     |
|           |                                                                                  |                                                                                              |                                                                                     |
|           |                                                                                  |                                                                                              |                                                                                     |

Please place an "X" next to the following statement to indicate your agreement:

I certify that I have answered every question and have not altered the wording of any of the questions on this form.

## ICMJE DISCLOSURE FORM

**Date:** 8/7/2023

**Your Name:** Frank Weilert

**Manuscript Title:** Safety and off-treatment response of patients with chronic hepatitis B virus infection receiving long-term open-label vebicorvir

**Manuscript Number (if known):** [Click or tap here to enter text.](#)

In the interest of transparency, we ask you to disclose all relationships/activities/interests listed below that are related to the content of your manuscript. "Related" means any relation with for-profit or not-for-profit third parties whose interests may be affected by the content of the manuscript. Disclosure represents a commitment to transparency and does not necessarily indicate a bias. If you are in doubt about whether to list a relationship/activity/interest, it is preferable that you do so.

In the interest of transparency, we ask you to disclose all relationships/activities/interests listed below that are related to the content of your manuscript. "Related" means any relation with for-profit or not-for-profit third parties whose interests may be affected by the content of the manuscript. Disclosure represents a commitment to transparency and does not necessarily indicate a bias. If you are in doubt about whether to list a relationship/activity/interest, it is preferable that you do so.

The author's relationships/activities/interests should be defined broadly. For example, if your manuscript pertains to the epidemiology of hypertension, you should declare all relationships with manufacturers of antihypertensive medication, even if that medication is not mentioned in the manuscript.

In item #1 below, report all support for the work reported in this manuscript without time limit. For all other items, the time frame for disclosure is the past 36 months.

|                                                    | Name all entities with whom you have this relationship or indicate none (add rows as needed)                                                                                   | Specifications/Comments (e.g., if payments were made to you or to your institution)                                                                                                                                                                                                                                                                                                                                         |        |                    |  |  |  |                                           |
|----------------------------------------------------|--------------------------------------------------------------------------------------------------------------------------------------------------------------------------------|-----------------------------------------------------------------------------------------------------------------------------------------------------------------------------------------------------------------------------------------------------------------------------------------------------------------------------------------------------------------------------------------------------------------------------|--------|--------------------|--|--|--|-------------------------------------------|
| Time frame: Since the initial planning of the work |                                                                                                                                                                                |                                                                                                                                                                                                                                                                                                                                                                                                                             |        |                    |  |  |  |                                           |
| <b>1</b>                                           | All support for the present manuscript (e.g., funding, provision of study materials, medical writing, article processing charges, etc.)<br><b>No time limit for this item.</b> | <input checked="" type="checkbox"/> <b>None</b><br><table border="1" style="width: 100%; border-collapse: collapse; margin-top: 5px;"> <tr><td style="width: 60%; height: 20px;"></td><td style="width: 40%;"></td></tr> <tr><td style="height: 20px;"></td><td></td></tr> <tr><td style="height: 20px;"></td><td style="text-align: right; font-size: small;">Click the tab key to add additional rows.</td></tr> </table> |        |                    |  |  |  | Click the tab key to add additional rows. |
|                                                    |                                                                                                                                                                                |                                                                                                                                                                                                                                                                                                                                                                                                                             |        |                    |  |  |  |                                           |
|                                                    |                                                                                                                                                                                |                                                                                                                                                                                                                                                                                                                                                                                                                             |        |                    |  |  |  |                                           |
|                                                    | Click the tab key to add additional rows.                                                                                                                                      |                                                                                                                                                                                                                                                                                                                                                                                                                             |        |                    |  |  |  |                                           |
| Time frame: past 36 months                         |                                                                                                                                                                                |                                                                                                                                                                                                                                                                                                                                                                                                                             |        |                    |  |  |  |                                           |
| <b>2</b>                                           | Grants or contracts from any entity (if not indicated in item #1 above).                                                                                                       | <input type="checkbox"/> <b>None</b><br><table border="1" style="width: 100%; border-collapse: collapse; margin-top: 5px;"> <tr> <td style="width: 60%; padding: 2px;">AbbVie</td> <td style="width: 40%; padding: 2px;">Study investigator</td> </tr> <tr><td style="height: 20px;"></td><td></td></tr> <tr><td style="height: 20px;"></td><td></td></tr> </table>                                                         | AbbVie | Study investigator |  |  |  |                                           |
| AbbVie                                             | Study investigator                                                                                                                                                             |                                                                                                                                                                                                                                                                                                                                                                                                                             |        |                    |  |  |  |                                           |
|                                                    |                                                                                                                                                                                |                                                                                                                                                                                                                                                                                                                                                                                                                             |        |                    |  |  |  |                                           |
|                                                    |                                                                                                                                                                                |                                                                                                                                                                                                                                                                                                                                                                                                                             |        |                    |  |  |  |                                           |

|           |                                                                                                              | Name all entities with whom you have this relationship or indicate none (add rows as needed)                                                                                                                                                                                                                                                                                                                             | Specifications/Comments (e.g., if payments were made to you or to your institution) |  |  |  |  |  |  |  |  |  |  |
|-----------|--------------------------------------------------------------------------------------------------------------|--------------------------------------------------------------------------------------------------------------------------------------------------------------------------------------------------------------------------------------------------------------------------------------------------------------------------------------------------------------------------------------------------------------------------|-------------------------------------------------------------------------------------|--|--|--|--|--|--|--|--|--|--|
| <b>3</b>  | Royalties or licenses                                                                                        | <input checked="" type="checkbox"/> <b>None</b><br><table border="1" style="width: 100%; border-collapse: collapse;"> <tr><td style="width: 50%; height: 20px;"></td><td style="width: 50%;"></td></tr> <tr><td style="height: 20px;"></td><td></td></tr> <tr><td style="height: 20px;"></td><td></td></tr> </table>                                                                                                     |                                                                                     |  |  |  |  |  |  |  |  |  |  |
|           |                                                                                                              |                                                                                                                                                                                                                                                                                                                                                                                                                          |                                                                                     |  |  |  |  |  |  |  |  |  |  |
|           |                                                                                                              |                                                                                                                                                                                                                                                                                                                                                                                                                          |                                                                                     |  |  |  |  |  |  |  |  |  |  |
|           |                                                                                                              |                                                                                                                                                                                                                                                                                                                                                                                                                          |                                                                                     |  |  |  |  |  |  |  |  |  |  |
| <b>4</b>  | Consulting fees                                                                                              | <input checked="" type="checkbox"/> <b>None</b><br><table border="1" style="width: 100%; border-collapse: collapse;"> <tr><td style="width: 50%; height: 20px;"></td><td style="width: 50%;"></td></tr> <tr><td style="height: 20px;"></td><td></td></tr> <tr><td style="height: 20px;"></td><td></td></tr> <tr><td style="height: 20px;"></td><td></td></tr> </table>                                                   |                                                                                     |  |  |  |  |  |  |  |  |  |  |
|           |                                                                                                              |                                                                                                                                                                                                                                                                                                                                                                                                                          |                                                                                     |  |  |  |  |  |  |  |  |  |  |
|           |                                                                                                              |                                                                                                                                                                                                                                                                                                                                                                                                                          |                                                                                     |  |  |  |  |  |  |  |  |  |  |
|           |                                                                                                              |                                                                                                                                                                                                                                                                                                                                                                                                                          |                                                                                     |  |  |  |  |  |  |  |  |  |  |
|           |                                                                                                              |                                                                                                                                                                                                                                                                                                                                                                                                                          |                                                                                     |  |  |  |  |  |  |  |  |  |  |
| <b>5</b>  | Payment or honoraria for lectures, presentations, speakers bureaus, manuscript writing or educational events | <input checked="" type="checkbox"/> <b>None</b><br><table border="1" style="width: 100%; border-collapse: collapse;"> <tr><td style="width: 50%; height: 20px;"></td><td style="width: 50%;"></td></tr> <tr><td style="height: 20px;"></td><td></td></tr> <tr><td style="height: 20px;"></td><td></td></tr> <tr><td style="height: 20px;"></td><td></td></tr> <tr><td style="height: 20px;"></td><td></td></tr> </table> |                                                                                     |  |  |  |  |  |  |  |  |  |  |
|           |                                                                                                              |                                                                                                                                                                                                                                                                                                                                                                                                                          |                                                                                     |  |  |  |  |  |  |  |  |  |  |
|           |                                                                                                              |                                                                                                                                                                                                                                                                                                                                                                                                                          |                                                                                     |  |  |  |  |  |  |  |  |  |  |
|           |                                                                                                              |                                                                                                                                                                                                                                                                                                                                                                                                                          |                                                                                     |  |  |  |  |  |  |  |  |  |  |
|           |                                                                                                              |                                                                                                                                                                                                                                                                                                                                                                                                                          |                                                                                     |  |  |  |  |  |  |  |  |  |  |
|           |                                                                                                              |                                                                                                                                                                                                                                                                                                                                                                                                                          |                                                                                     |  |  |  |  |  |  |  |  |  |  |
| <b>6</b>  | Payment for expert testimony                                                                                 | <input checked="" type="checkbox"/> <b>None</b><br><table border="1" style="width: 100%; border-collapse: collapse;"> <tr><td style="width: 50%; height: 20px;"></td><td style="width: 50%;"></td></tr> <tr><td style="height: 20px;"></td><td></td></tr> <tr><td style="height: 20px;"></td><td></td></tr> </table>                                                                                                     |                                                                                     |  |  |  |  |  |  |  |  |  |  |
|           |                                                                                                              |                                                                                                                                                                                                                                                                                                                                                                                                                          |                                                                                     |  |  |  |  |  |  |  |  |  |  |
|           |                                                                                                              |                                                                                                                                                                                                                                                                                                                                                                                                                          |                                                                                     |  |  |  |  |  |  |  |  |  |  |
|           |                                                                                                              |                                                                                                                                                                                                                                                                                                                                                                                                                          |                                                                                     |  |  |  |  |  |  |  |  |  |  |
| <b>7</b>  | Support for attending meetings and/or travel                                                                 | <input checked="" type="checkbox"/> <b>None</b><br><table border="1" style="width: 100%; border-collapse: collapse;"> <tr><td style="width: 50%; height: 20px;"></td><td style="width: 50%;"></td></tr> <tr><td style="height: 20px;"></td><td></td></tr> <tr><td style="height: 20px;"></td><td></td></tr> </table>                                                                                                     |                                                                                     |  |  |  |  |  |  |  |  |  |  |
|           |                                                                                                              |                                                                                                                                                                                                                                                                                                                                                                                                                          |                                                                                     |  |  |  |  |  |  |  |  |  |  |
|           |                                                                                                              |                                                                                                                                                                                                                                                                                                                                                                                                                          |                                                                                     |  |  |  |  |  |  |  |  |  |  |
|           |                                                                                                              |                                                                                                                                                                                                                                                                                                                                                                                                                          |                                                                                     |  |  |  |  |  |  |  |  |  |  |
| <b>8</b>  | Patents planned, issued or pending                                                                           | <input checked="" type="checkbox"/> <b>None</b><br><table border="1" style="width: 100%; border-collapse: collapse;"> <tr><td style="width: 50%; height: 20px;"></td><td style="width: 50%;"></td></tr> <tr><td style="height: 20px;"></td><td></td></tr> <tr><td style="height: 20px;"></td><td></td></tr> </table>                                                                                                     |                                                                                     |  |  |  |  |  |  |  |  |  |  |
|           |                                                                                                              |                                                                                                                                                                                                                                                                                                                                                                                                                          |                                                                                     |  |  |  |  |  |  |  |  |  |  |
|           |                                                                                                              |                                                                                                                                                                                                                                                                                                                                                                                                                          |                                                                                     |  |  |  |  |  |  |  |  |  |  |
|           |                                                                                                              |                                                                                                                                                                                                                                                                                                                                                                                                                          |                                                                                     |  |  |  |  |  |  |  |  |  |  |
| <b>9</b>  | Participation on a Data Safety Monitoring Board or Advisory Board                                            | <input checked="" type="checkbox"/> <b>None</b><br><table border="1" style="width: 100%; border-collapse: collapse;"> <tr><td style="width: 50%; height: 20px;"></td><td style="width: 50%;"></td></tr> <tr><td style="height: 20px;"></td><td></td></tr> <tr><td style="height: 20px;"></td><td></td></tr> </table>                                                                                                     |                                                                                     |  |  |  |  |  |  |  |  |  |  |
|           |                                                                                                              |                                                                                                                                                                                                                                                                                                                                                                                                                          |                                                                                     |  |  |  |  |  |  |  |  |  |  |
|           |                                                                                                              |                                                                                                                                                                                                                                                                                                                                                                                                                          |                                                                                     |  |  |  |  |  |  |  |  |  |  |
|           |                                                                                                              |                                                                                                                                                                                                                                                                                                                                                                                                                          |                                                                                     |  |  |  |  |  |  |  |  |  |  |
| <b>10</b> | Leadership or fiduciary role in other board,                                                                 | <input checked="" type="checkbox"/> <b>None</b><br><table border="1" style="width: 100%; border-collapse: collapse;"> <tr><td style="width: 50%; height: 20px;"></td><td style="width: 50%;"></td></tr> </table>                                                                                                                                                                                                         |                                                                                     |  |  |  |  |  |  |  |  |  |  |
|           |                                                                                                              |                                                                                                                                                                                                                                                                                                                                                                                                                          |                                                                                     |  |  |  |  |  |  |  |  |  |  |

|           |                                                                                  | Name all entities with whom you have this relationship or indicate none (add rows as needed) | Specifications/Comments (e.g., if payments were made to you or to your institution) |
|-----------|----------------------------------------------------------------------------------|----------------------------------------------------------------------------------------------|-------------------------------------------------------------------------------------|
|           | society, committee or advocacy group, paid or unpaid                             |                                                                                              |                                                                                     |
| <b>11</b> | Stock or stock options                                                           | <input checked="" type="checkbox"/> <b>None</b>                                              |                                                                                     |
|           |                                                                                  |                                                                                              |                                                                                     |
|           |                                                                                  |                                                                                              |                                                                                     |
| <b>12</b> | Receipt of equipment, materials, drugs, medical writing, gifts or other services | <input checked="" type="checkbox"/> <b>None</b>                                              |                                                                                     |
|           |                                                                                  |                                                                                              |                                                                                     |
|           |                                                                                  |                                                                                              |                                                                                     |
| <b>13</b> | Other financial or non-financial interests                                       | <input checked="" type="checkbox"/> <b>None</b>                                              |                                                                                     |
|           |                                                                                  |                                                                                              |                                                                                     |
|           |                                                                                  |                                                                                              |                                                                                     |

Please place an "X" next to the following statement to indicate your agreement:

I certify that I have answered every question and have not altered the wording of any of the questions on this form.

## ICMJE DISCLOSURE FORM

**Date:** 8/7/2023

**Your Name:** Alnoor Ramji

**Manuscript Title:** Safety and off-treatment response of patients with chronic hepatitis B virus infection receiving long-term open-label vebicorvir

**Manuscript Number (if known):** [Click or tap here to enter text.](#)

In the interest of transparency, we ask you to disclose all relationships/activities/interests listed below that are related to the content of your manuscript. "Related" means any relation with for-profit or not-for-profit third parties whose interests may be affected by the content of the manuscript. Disclosure represents a commitment to transparency and does not necessarily indicate a bias. If you are in doubt about whether to list a relationship/activity/interest, it is preferable that you do so.

In the interest of transparency, we ask you to disclose all relationships/activities/interests listed below that are related to the content of your manuscript. "Related" means any relation with for-profit or not-for-profit third parties whose interests may be affected by the content of the manuscript. Disclosure represents a commitment to transparency and does not necessarily indicate a bias. If you are in doubt about whether to list a relationship/activity/interest, it is preferable that you do so.

The author's relationships/activities/interests should be defined broadly. For example, if your manuscript pertains to the epidemiology of hypertension, you should declare all relationships with manufacturers of antihypertensive medication, even if that medication is not mentioned in the manuscript.

In item #1 below, report all support for the work reported in this manuscript without time limit. For all other items, the time frame for disclosure is the past 36 months.

|                                                    | Name all entities with whom you have this relationship or indicate none (add rows as needed)                                                                                   | Specifications/Comments (e.g., if payments were made to you or to your institution)                                                                                                                                                                                                                                                                                                                                                       |        |               |         |                 |                           |       |          |
|----------------------------------------------------|--------------------------------------------------------------------------------------------------------------------------------------------------------------------------------|-------------------------------------------------------------------------------------------------------------------------------------------------------------------------------------------------------------------------------------------------------------------------------------------------------------------------------------------------------------------------------------------------------------------------------------------|--------|---------------|---------|-----------------|---------------------------|-------|----------|
| Time frame: Since the initial planning of the work |                                                                                                                                                                                |                                                                                                                                                                                                                                                                                                                                                                                                                                           |        |               |         |                 |                           |       |          |
| <b>1</b>                                           | All support for the present manuscript (e.g., funding, provision of study materials, medical writing, article processing charges, etc.)<br><b>No time limit for this item.</b> | <input checked="" type="checkbox"/> <b>None</b><br><table border="1" style="width: 100%; border-collapse: collapse; margin-top: 5px;"> <tr><td style="height: 20px;"> </td><td style="width: 20px;"> </td></tr> <tr><td style="height: 20px;"> </td><td> </td></tr> <tr><td style="height: 20px;"> </td><td> </td></tr> </table> <p style="font-size: small; color: gray; margin-top: 5px;">Click the tab key to add additional rows.</p> |        |               |         |                 |                           |       |          |
|                                                    |                                                                                                                                                                                |                                                                                                                                                                                                                                                                                                                                                                                                                                           |        |               |         |                 |                           |       |          |
|                                                    |                                                                                                                                                                                |                                                                                                                                                                                                                                                                                                                                                                                                                                           |        |               |         |                 |                           |       |          |
|                                                    |                                                                                                                                                                                |                                                                                                                                                                                                                                                                                                                                                                                                                                           |        |               |         |                 |                           |       |          |
| Time frame: past 36 months                         |                                                                                                                                                                                |                                                                                                                                                                                                                                                                                                                                                                                                                                           |        |               |         |                 |                           |       |          |
| <b>2</b>                                           | Grants or contracts from any entity (if not indicated in item #1 above).                                                                                                       | <input type="checkbox"/> <b>None</b><br><table border="1" style="width: 100%; border-collapse: collapse; margin-top: 5px;"> <tr><td style="width: 70%;">AbbVie</td><td rowspan="5" style="width: 30%; vertical-align: top;">Grant support</td></tr> <tr><td>Celgene</td></tr> <tr><td>Gilead Sciences</td></tr> <tr><td>Intercept Pharmaceuticals</td></tr> <tr><td>Merck</td></tr> <tr><td>Novartis</td></tr> </table>                   | AbbVie | Grant support | Celgene | Gilead Sciences | Intercept Pharmaceuticals | Merck | Novartis |
| AbbVie                                             | Grant support                                                                                                                                                                  |                                                                                                                                                                                                                                                                                                                                                                                                                                           |        |               |         |                 |                           |       |          |
| Celgene                                            |                                                                                                                                                                                |                                                                                                                                                                                                                                                                                                                                                                                                                                           |        |               |         |                 |                           |       |          |
| Gilead Sciences                                    |                                                                                                                                                                                |                                                                                                                                                                                                                                                                                                                                                                                                                                           |        |               |         |                 |                           |       |          |
| Intercept Pharmaceuticals                          |                                                                                                                                                                                |                                                                                                                                                                                                                                                                                                                                                                                                                                           |        |               |         |                 |                           |       |          |
| Merck                                              |                                                                                                                                                                                |                                                                                                                                                                                                                                                                                                                                                                                                                                           |        |               |         |                 |                           |       |          |
| Novartis                                           |                                                                                                                                                                                |                                                                                                                                                                                                                                                                                                                                                                                                                                           |        |               |         |                 |                           |       |          |

|                           |                                                                                                              | Name all entities with whom you have this relationship or indicate none (add rows as needed)                                                                                                                                                                                                                                                                                                                                                                                                                                                                                                                                                     | Specifications/Comments (e.g., if payments were made to you or to your institution) |                     |         |                 |                           |       |          |  |  |  |  |  |  |  |  |
|---------------------------|--------------------------------------------------------------------------------------------------------------|--------------------------------------------------------------------------------------------------------------------------------------------------------------------------------------------------------------------------------------------------------------------------------------------------------------------------------------------------------------------------------------------------------------------------------------------------------------------------------------------------------------------------------------------------------------------------------------------------------------------------------------------------|-------------------------------------------------------------------------------------|---------------------|---------|-----------------|---------------------------|-------|----------|--|--|--|--|--|--|--|--|
| <b>3</b>                  | Royalties or licenses                                                                                        | <input checked="" type="checkbox"/> <b>None</b><br><table border="1" style="width: 100%; border-collapse: collapse;"> <tr><td style="width: 50%; height: 20px;"></td><td style="width: 50%;"></td></tr> <tr><td style="height: 20px;"></td><td></td></tr> <tr><td style="height: 20px;"></td><td></td></tr> </table>                                                                                                                                                                                                                                                                                                                             |                                                                                     |                     |         |                 |                           |       |          |  |  |  |  |  |  |  |  |
|                           |                                                                                                              |                                                                                                                                                                                                                                                                                                                                                                                                                                                                                                                                                                                                                                                  |                                                                                     |                     |         |                 |                           |       |          |  |  |  |  |  |  |  |  |
|                           |                                                                                                              |                                                                                                                                                                                                                                                                                                                                                                                                                                                                                                                                                                                                                                                  |                                                                                     |                     |         |                 |                           |       |          |  |  |  |  |  |  |  |  |
|                           |                                                                                                              |                                                                                                                                                                                                                                                                                                                                                                                                                                                                                                                                                                                                                                                  |                                                                                     |                     |         |                 |                           |       |          |  |  |  |  |  |  |  |  |
| <b>4</b>                  | Consulting fees                                                                                              | <input checked="" type="checkbox"/> <b>None</b><br><table border="1" style="width: 100%; border-collapse: collapse;"> <tr><td style="width: 50%; height: 20px;"></td><td style="width: 50%;"></td></tr> <tr><td style="height: 20px;"></td><td></td></tr> </table>                                                                                                                     |                                                                                     |                     |         |                 |                           |       |          |  |  |  |  |  |  |  |  |
|                           |                                                                                                              |                                                                                                                                                                                                                                                                                                                                                                                                                                                                                                                                                                                                                                                  |                                                                                     |                     |         |                 |                           |       |          |  |  |  |  |  |  |  |  |
|                           |                                                                                                              |                                                                                                                                                                                                                                                                                                                                                                                                                                                                                                                                                                                                                                                  |                                                                                     |                     |         |                 |                           |       |          |  |  |  |  |  |  |  |  |
|                           |                                                                                                              |                                                                                                                                                                                                                                                                                                                                                                                                                                                                                                                                                                                                                                                  |                                                                                     |                     |         |                 |                           |       |          |  |  |  |  |  |  |  |  |
|                           |                                                                                                              |                                                                                                                                                                                                                                                                                                                                                                                                                                                                                                                                                                                                                                                  |                                                                                     |                     |         |                 |                           |       |          |  |  |  |  |  |  |  |  |
|                           |                                                                                                              |                                                                                                                                                                                                                                                                                                                                                                                                                                                                                                                                                                                                                                                  |                                                                                     |                     |         |                 |                           |       |          |  |  |  |  |  |  |  |  |
|                           |                                                                                                              |                                                                                                                                                                                                                                                                                                                                                                                                                                                                                                                                                                                                                                                  |                                                                                     |                     |         |                 |                           |       |          |  |  |  |  |  |  |  |  |
|                           |                                                                                                              |                                                                                                                                                                                                                                                                                                                                                                                                                                                                                                                                                                                                                                                  |                                                                                     |                     |         |                 |                           |       |          |  |  |  |  |  |  |  |  |
| <b>5</b>                  | Payment or honoraria for lectures, presentations, speakers bureaus, manuscript writing or educational events | <input type="checkbox"/> <b>None</b><br><table border="1" style="width: 100%; border-collapse: collapse;"> <tr> <td style="width: 50%; border-bottom: 1px solid black;">AbbVie</td> <td rowspan="6" style="width: 50%; vertical-align: top;">Lecture fees</td> </tr> <tr><td style="border-bottom: 1px solid black;">Celgene</td></tr> <tr><td style="border-bottom: 1px solid black;">Gilead Sciences</td></tr> <tr><td style="border-bottom: 1px solid black;">Intercept Pharmaceuticals</td></tr> <tr><td style="border-bottom: 1px solid black;">Merck</td></tr> <tr><td style="border-bottom: 1px solid black;">Novartis</td></tr> </table> | AbbVie                                                                              | Lecture fees        | Celgene | Gilead Sciences | Intercept Pharmaceuticals | Merck | Novartis |  |  |  |  |  |  |  |  |
| AbbVie                    | Lecture fees                                                                                                 |                                                                                                                                                                                                                                                                                                                                                                                                                                                                                                                                                                                                                                                  |                                                                                     |                     |         |                 |                           |       |          |  |  |  |  |  |  |  |  |
| Celgene                   |                                                                                                              |                                                                                                                                                                                                                                                                                                                                                                                                                                                                                                                                                                                                                                                  |                                                                                     |                     |         |                 |                           |       |          |  |  |  |  |  |  |  |  |
| Gilead Sciences           |                                                                                                              |                                                                                                                                                                                                                                                                                                                                                                                                                                                                                                                                                                                                                                                  |                                                                                     |                     |         |                 |                           |       |          |  |  |  |  |  |  |  |  |
| Intercept Pharmaceuticals |                                                                                                              |                                                                                                                                                                                                                                                                                                                                                                                                                                                                                                                                                                                                                                                  |                                                                                     |                     |         |                 |                           |       |          |  |  |  |  |  |  |  |  |
| Merck                     |                                                                                                              |                                                                                                                                                                                                                                                                                                                                                                                                                                                                                                                                                                                                                                                  |                                                                                     |                     |         |                 |                           |       |          |  |  |  |  |  |  |  |  |
| Novartis                  |                                                                                                              |                                                                                                                                                                                                                                                                                                                                                                                                                                                                                                                                                                                                                                                  |                                                                                     |                     |         |                 |                           |       |          |  |  |  |  |  |  |  |  |
| <b>6</b>                  | Payment for expert testimony                                                                                 | <input checked="" type="checkbox"/> <b>None</b><br><table border="1" style="width: 100%; border-collapse: collapse;"> <tr><td style="width: 50%; height: 20px;"></td><td style="width: 50%;"></td></tr> <tr><td style="height: 20px;"></td><td></td></tr> <tr><td style="height: 20px;"></td><td></td></tr> </table>                                                                                                                                                                                                                                                                                                                             |                                                                                     |                     |         |                 |                           |       |          |  |  |  |  |  |  |  |  |
|                           |                                                                                                              |                                                                                                                                                                                                                                                                                                                                                                                                                                                                                                                                                                                                                                                  |                                                                                     |                     |         |                 |                           |       |          |  |  |  |  |  |  |  |  |
|                           |                                                                                                              |                                                                                                                                                                                                                                                                                                                                                                                                                                                                                                                                                                                                                                                  |                                                                                     |                     |         |                 |                           |       |          |  |  |  |  |  |  |  |  |
|                           |                                                                                                              |                                                                                                                                                                                                                                                                                                                                                                                                                                                                                                                                                                                                                                                  |                                                                                     |                     |         |                 |                           |       |          |  |  |  |  |  |  |  |  |
| <b>7</b>                  | Support for attending meetings and/or travel                                                                 | <input checked="" type="checkbox"/> <b>None</b><br><table border="1" style="width: 100%; border-collapse: collapse;"> <tr><td style="width: 50%; height: 20px;"></td><td style="width: 50%;"></td></tr> <tr><td style="height: 20px;"></td><td></td></tr> <tr><td style="height: 20px;"></td><td></td></tr> </table>                                                                                                                                                                                                                                                                                                                             |                                                                                     |                     |         |                 |                           |       |          |  |  |  |  |  |  |  |  |
|                           |                                                                                                              |                                                                                                                                                                                                                                                                                                                                                                                                                                                                                                                                                                                                                                                  |                                                                                     |                     |         |                 |                           |       |          |  |  |  |  |  |  |  |  |
|                           |                                                                                                              |                                                                                                                                                                                                                                                                                                                                                                                                                                                                                                                                                                                                                                                  |                                                                                     |                     |         |                 |                           |       |          |  |  |  |  |  |  |  |  |
|                           |                                                                                                              |                                                                                                                                                                                                                                                                                                                                                                                                                                                                                                                                                                                                                                                  |                                                                                     |                     |         |                 |                           |       |          |  |  |  |  |  |  |  |  |
| <b>8</b>                  | Patents planned, issued or pending                                                                           | <input checked="" type="checkbox"/> <b>None</b><br><table border="1" style="width: 100%; border-collapse: collapse;"> <tr><td style="width: 50%; height: 20px;"></td><td style="width: 50%;"></td></tr> <tr><td style="height: 20px;"></td><td></td></tr> <tr><td style="height: 20px;"></td><td></td></tr> </table>                                                                                                                                                                                                                                                                                                                             |                                                                                     |                     |         |                 |                           |       |          |  |  |  |  |  |  |  |  |
|                           |                                                                                                              |                                                                                                                                                                                                                                                                                                                                                                                                                                                                                                                                                                                                                                                  |                                                                                     |                     |         |                 |                           |       |          |  |  |  |  |  |  |  |  |
|                           |                                                                                                              |                                                                                                                                                                                                                                                                                                                                                                                                                                                                                                                                                                                                                                                  |                                                                                     |                     |         |                 |                           |       |          |  |  |  |  |  |  |  |  |
|                           |                                                                                                              |                                                                                                                                                                                                                                                                                                                                                                                                                                                                                                                                                                                                                                                  |                                                                                     |                     |         |                 |                           |       |          |  |  |  |  |  |  |  |  |
| <b>9</b>                  | Participation on a Data Safety Monitoring Board or Advisory Board                                            | <input type="checkbox"/> <b>None</b><br><table border="1" style="width: 100%; border-collapse: collapse;"> <tr> <td style="width: 50%; border-bottom: 1px solid black;">AbbVie</td> <td rowspan="4" style="width: 50%; vertical-align: top;">Advisory board fees</td> </tr> <tr><td style="border-bottom: 1px solid black;">Celgene</td></tr> <tr><td style="border-bottom: 1px solid black;">Gilead Sciences</td></tr> <tr><td style="border-bottom: 1px solid black;">Intercept Pharmaceuticals</td></tr> </table>                                                                                                                             | AbbVie                                                                              | Advisory board fees | Celgene | Gilead Sciences | Intercept Pharmaceuticals |       |          |  |  |  |  |  |  |  |  |
| AbbVie                    | Advisory board fees                                                                                          |                                                                                                                                                                                                                                                                                                                                                                                                                                                                                                                                                                                                                                                  |                                                                                     |                     |         |                 |                           |       |          |  |  |  |  |  |  |  |  |
| Celgene                   |                                                                                                              |                                                                                                                                                                                                                                                                                                                                                                                                                                                                                                                                                                                                                                                  |                                                                                     |                     |         |                 |                           |       |          |  |  |  |  |  |  |  |  |
| Gilead Sciences           |                                                                                                              |                                                                                                                                                                                                                                                                                                                                                                                                                                                                                                                                                                                                                                                  |                                                                                     |                     |         |                 |                           |       |          |  |  |  |  |  |  |  |  |
| Intercept Pharmaceuticals |                                                                                                              |                                                                                                                                                                                                                                                                                                                                                                                                                                                                                                                                                                                                                                                  |                                                                                     |                     |         |                 |                           |       |          |  |  |  |  |  |  |  |  |



|           |                                                                                                   | Name all entities with whom you have this relationship or indicate none (add rows as needed) | Specifications/Comments (e.g., if payments were made to you or to your institution) |
|-----------|---------------------------------------------------------------------------------------------------|----------------------------------------------------------------------------------------------|-------------------------------------------------------------------------------------|
|           |                                                                                                   | Merck<br>Novartis                                                                            |                                                                                     |
| <b>10</b> | Leadership or fiduciary role in other board, society, committee or advocacy group, paid or unpaid | <input checked="" type="checkbox"/> <b>None</b>                                              |                                                                                     |
|           |                                                                                                   |                                                                                              |                                                                                     |
|           |                                                                                                   |                                                                                              |                                                                                     |
| <b>11</b> | Stock or stock options                                                                            | <input checked="" type="checkbox"/> <b>None</b>                                              |                                                                                     |
|           |                                                                                                   |                                                                                              |                                                                                     |
|           |                                                                                                   |                                                                                              |                                                                                     |
| <b>12</b> | Receipt of equipment, materials, drugs, medical writing, gifts or other services                  | <input checked="" type="checkbox"/> <b>None</b>                                              |                                                                                     |
|           |                                                                                                   |                                                                                              |                                                                                     |
|           |                                                                                                   |                                                                                              |                                                                                     |
| <b>13</b> | Other financial or non-financial interests                                                        | <input checked="" type="checkbox"/> <b>None</b>                                              |                                                                                     |
|           |                                                                                                   |                                                                                              |                                                                                     |
|           |                                                                                                   |                                                                                              |                                                                                     |

Please place an "X" next to the following statement to indicate your agreement:

I certify that I have answered every question and have not altered the wording of any of the questions on this form.

## ICMJE DISCLOSURE FORM

**Date:** 8/7/2023

**Your Name:** Michael Bennett

**Manuscript Title:** Safety and off-treatment response of patients with chronic hepatitis B virus infection receiving long-term open-label vebicorvir

**Manuscript Number (if known):** [Click or tap here to enter text.](#)

In the interest of transparency, we ask you to disclose all relationships/activities/interests listed below that are related to the content of your manuscript. "Related" means any relation with for-profit or not-for-profit third parties whose interests may be affected by the content of the manuscript. Disclosure represents a commitment to transparency and does not necessarily indicate a bias. If you are in doubt about whether to list a relationship/activity/interest, it is preferable that you do so.

In the interest of transparency, we ask you to disclose all relationships/activities/interests listed below that are related to the content of your manuscript. "Related" means any relation with for-profit or not-for-profit third parties whose interests may be affected by the content of the manuscript. Disclosure represents a commitment to transparency and does not necessarily indicate a bias. If you are in doubt about whether to list a relationship/activity/interest, it is preferable that you do so.

The author's relationships/activities/interests should be defined broadly. For example, if your manuscript pertains to the epidemiology of hypertension, you should declare all relationships with manufacturers of antihypertensive medication, even if that medication is not mentioned in the manuscript.

In item #1 below, report all support for the work reported in this manuscript without time limit. For all other items, the time frame for disclosure is the past 36 months.

|                                                    | Name all entities with whom you have this relationship or indicate none (add rows as needed)                                                                                   | Specifications/Comments (e.g., if payments were made to you or to your institution)                                                                                                                                                                                                                                                                                     |  |  |  |  |  |  |  |  |
|----------------------------------------------------|--------------------------------------------------------------------------------------------------------------------------------------------------------------------------------|-------------------------------------------------------------------------------------------------------------------------------------------------------------------------------------------------------------------------------------------------------------------------------------------------------------------------------------------------------------------------|--|--|--|--|--|--|--|--|
| Time frame: Since the initial planning of the work |                                                                                                                                                                                |                                                                                                                                                                                                                                                                                                                                                                         |  |  |  |  |  |  |  |  |
| <b>1</b>                                           | All support for the present manuscript (e.g., funding, provision of study materials, medical writing, article processing charges, etc.)<br><b>No time limit for this item.</b> | <input checked="" type="checkbox"/> <b>None</b><br><table border="1" style="width: 100%; height: 40px; margin-top: 5px;"> <tr><td style="width: 60%;"></td><td style="width: 40%;"></td></tr> <tr><td></td><td></td></tr> <tr><td></td><td></td></tr> </table> <p style="font-size: small; color: gray; margin-top: 5px;">Click the tab key to add additional rows.</p> |  |  |  |  |  |  |  |  |
|                                                    |                                                                                                                                                                                |                                                                                                                                                                                                                                                                                                                                                                         |  |  |  |  |  |  |  |  |
|                                                    |                                                                                                                                                                                |                                                                                                                                                                                                                                                                                                                                                                         |  |  |  |  |  |  |  |  |
|                                                    |                                                                                                                                                                                |                                                                                                                                                                                                                                                                                                                                                                         |  |  |  |  |  |  |  |  |
| Time frame: past 36 months                         |                                                                                                                                                                                |                                                                                                                                                                                                                                                                                                                                                                         |  |  |  |  |  |  |  |  |
| <b>2</b>                                           | Grants or contracts from any entity (if not indicated in item #1 above).                                                                                                       | <input checked="" type="checkbox"/> <b>None</b><br><table border="1" style="width: 100%; height: 60px; margin-top: 5px;"> <tr><td style="width: 60%;"></td><td style="width: 40%;"></td></tr> <tr><td></td><td></td></tr> <tr><td></td><td></td></tr> <tr><td></td><td></td></tr> </table>                                                                              |  |  |  |  |  |  |  |  |
|                                                    |                                                                                                                                                                                |                                                                                                                                                                                                                                                                                                                                                                         |  |  |  |  |  |  |  |  |
|                                                    |                                                                                                                                                                                |                                                                                                                                                                                                                                                                                                                                                                         |  |  |  |  |  |  |  |  |
|                                                    |                                                                                                                                                                                |                                                                                                                                                                                                                                                                                                                                                                         |  |  |  |  |  |  |  |  |
|                                                    |                                                                                                                                                                                |                                                                                                                                                                                                                                                                                                                                                                         |  |  |  |  |  |  |  |  |

|          |                                                                                                              | Name all entities with whom you have this relationship or indicate none (add rows as needed)                                                                                                                                                                                                                                                                                                                                                                                                                                 | Specifications/Comments (e.g., if payments were made to you or to your institution) |  |  |  |  |  |  |  |  |  |  |  |  |  |  |
|----------|--------------------------------------------------------------------------------------------------------------|------------------------------------------------------------------------------------------------------------------------------------------------------------------------------------------------------------------------------------------------------------------------------------------------------------------------------------------------------------------------------------------------------------------------------------------------------------------------------------------------------------------------------|-------------------------------------------------------------------------------------|--|--|--|--|--|--|--|--|--|--|--|--|--|--|
| <b>3</b> | Royalties or licenses                                                                                        | <input checked="" type="checkbox"/> <b>None</b><br><table border="1" style="width: 100%; border-collapse: collapse;"> <tr><td style="width: 50%; height: 15px;"></td><td style="width: 50%;"></td></tr> <tr><td style="height: 15px;"></td><td></td></tr> <tr><td style="height: 15px;"></td><td></td></tr> </table>                                                                                                                                                                                                         |                                                                                     |  |  |  |  |  |  |  |  |  |  |  |  |  |  |
|          |                                                                                                              |                                                                                                                                                                                                                                                                                                                                                                                                                                                                                                                              |                                                                                     |  |  |  |  |  |  |  |  |  |  |  |  |  |  |
|          |                                                                                                              |                                                                                                                                                                                                                                                                                                                                                                                                                                                                                                                              |                                                                                     |  |  |  |  |  |  |  |  |  |  |  |  |  |  |
|          |                                                                                                              |                                                                                                                                                                                                                                                                                                                                                                                                                                                                                                                              |                                                                                     |  |  |  |  |  |  |  |  |  |  |  |  |  |  |
| <b>4</b> | Consulting fees                                                                                              | <input checked="" type="checkbox"/> <b>None</b><br><table border="1" style="width: 100%; border-collapse: collapse;"> <tr><td style="width: 50%; height: 15px;"></td><td style="width: 50%;"></td></tr> <tr><td style="height: 15px;"></td><td></td></tr> </table> |                                                                                     |  |  |  |  |  |  |  |  |  |  |  |  |  |  |
|          |                                                                                                              |                                                                                                                                                                                                                                                                                                                                                                                                                                                                                                                              |                                                                                     |  |  |  |  |  |  |  |  |  |  |  |  |  |  |
|          |                                                                                                              |                                                                                                                                                                                                                                                                                                                                                                                                                                                                                                                              |                                                                                     |  |  |  |  |  |  |  |  |  |  |  |  |  |  |
|          |                                                                                                              |                                                                                                                                                                                                                                                                                                                                                                                                                                                                                                                              |                                                                                     |  |  |  |  |  |  |  |  |  |  |  |  |  |  |
|          |                                                                                                              |                                                                                                                                                                                                                                                                                                                                                                                                                                                                                                                              |                                                                                     |  |  |  |  |  |  |  |  |  |  |  |  |  |  |
|          |                                                                                                              |                                                                                                                                                                                                                                                                                                                                                                                                                                                                                                                              |                                                                                     |  |  |  |  |  |  |  |  |  |  |  |  |  |  |
|          |                                                                                                              |                                                                                                                                                                                                                                                                                                                                                                                                                                                                                                                              |                                                                                     |  |  |  |  |  |  |  |  |  |  |  |  |  |  |
|          |                                                                                                              |                                                                                                                                                                                                                                                                                                                                                                                                                                                                                                                              |                                                                                     |  |  |  |  |  |  |  |  |  |  |  |  |  |  |
| <b>5</b> | Payment or honoraria for lectures, presentations, speakers bureaus, manuscript writing or educational events | <input checked="" type="checkbox"/> <b>None</b><br><table border="1" style="width: 100%; border-collapse: collapse;"> <tr><td style="width: 50%; height: 15px;"></td><td style="width: 50%;"></td></tr> <tr><td style="height: 15px;"></td><td></td></tr> <tr><td style="height: 15px;"></td><td></td></tr> </table>                                                                                                                                                                                                         |                                                                                     |  |  |  |  |  |  |  |  |  |  |  |  |  |  |
|          |                                                                                                              |                                                                                                                                                                                                                                                                                                                                                                                                                                                                                                                              |                                                                                     |  |  |  |  |  |  |  |  |  |  |  |  |  |  |
|          |                                                                                                              |                                                                                                                                                                                                                                                                                                                                                                                                                                                                                                                              |                                                                                     |  |  |  |  |  |  |  |  |  |  |  |  |  |  |
|          |                                                                                                              |                                                                                                                                                                                                                                                                                                                                                                                                                                                                                                                              |                                                                                     |  |  |  |  |  |  |  |  |  |  |  |  |  |  |
| <b>6</b> | Payment for expert testimony                                                                                 | <input checked="" type="checkbox"/> <b>None</b><br><table border="1" style="width: 100%; border-collapse: collapse;"> <tr><td style="width: 50%; height: 15px;"></td><td style="width: 50%;"></td></tr> <tr><td style="height: 15px;"></td><td></td></tr> <tr><td style="height: 15px;"></td><td></td></tr> </table>                                                                                                                                                                                                         |                                                                                     |  |  |  |  |  |  |  |  |  |  |  |  |  |  |
|          |                                                                                                              |                                                                                                                                                                                                                                                                                                                                                                                                                                                                                                                              |                                                                                     |  |  |  |  |  |  |  |  |  |  |  |  |  |  |
|          |                                                                                                              |                                                                                                                                                                                                                                                                                                                                                                                                                                                                                                                              |                                                                                     |  |  |  |  |  |  |  |  |  |  |  |  |  |  |
|          |                                                                                                              |                                                                                                                                                                                                                                                                                                                                                                                                                                                                                                                              |                                                                                     |  |  |  |  |  |  |  |  |  |  |  |  |  |  |
| <b>7</b> | Support for attending meetings and/or travel                                                                 | <input checked="" type="checkbox"/> <b>None</b><br><table border="1" style="width: 100%; border-collapse: collapse;"> <tr><td style="width: 50%; height: 15px;"></td><td style="width: 50%;"></td></tr> <tr><td style="height: 15px;"></td><td></td></tr> <tr><td style="height: 15px;"></td><td></td></tr> </table>                                                                                                                                                                                                         |                                                                                     |  |  |  |  |  |  |  |  |  |  |  |  |  |  |
|          |                                                                                                              |                                                                                                                                                                                                                                                                                                                                                                                                                                                                                                                              |                                                                                     |  |  |  |  |  |  |  |  |  |  |  |  |  |  |
|          |                                                                                                              |                                                                                                                                                                                                                                                                                                                                                                                                                                                                                                                              |                                                                                     |  |  |  |  |  |  |  |  |  |  |  |  |  |  |
|          |                                                                                                              |                                                                                                                                                                                                                                                                                                                                                                                                                                                                                                                              |                                                                                     |  |  |  |  |  |  |  |  |  |  |  |  |  |  |
| <b>8</b> | Patents planned, issued or pending                                                                           | <input checked="" type="checkbox"/> <b>None</b><br><table border="1" style="width: 100%; border-collapse: collapse;"> <tr><td style="width: 50%; height: 15px;"></td><td style="width: 50%;"></td></tr> <tr><td style="height: 15px;"></td><td></td></tr> <tr><td style="height: 15px;"></td><td></td></tr> </table>                                                                                                                                                                                                         |                                                                                     |  |  |  |  |  |  |  |  |  |  |  |  |  |  |
|          |                                                                                                              |                                                                                                                                                                                                                                                                                                                                                                                                                                                                                                                              |                                                                                     |  |  |  |  |  |  |  |  |  |  |  |  |  |  |
|          |                                                                                                              |                                                                                                                                                                                                                                                                                                                                                                                                                                                                                                                              |                                                                                     |  |  |  |  |  |  |  |  |  |  |  |  |  |  |
|          |                                                                                                              |                                                                                                                                                                                                                                                                                                                                                                                                                                                                                                                              |                                                                                     |  |  |  |  |  |  |  |  |  |  |  |  |  |  |
| <b>9</b> | Participation on a Data Safety Monitoring Board or Advisory Board                                            | <input checked="" type="checkbox"/> <b>None</b><br><table border="1" style="width: 100%; border-collapse: collapse;"> <tr><td style="width: 50%; height: 15px;"></td><td style="width: 50%;"></td></tr> <tr><td style="height: 15px;"></td><td></td></tr> <tr><td style="height: 15px;"></td><td></td></tr> <tr><td style="height: 15px;"></td><td></td></tr> </table>                                                                                                                                                       |                                                                                     |  |  |  |  |  |  |  |  |  |  |  |  |  |  |
|          |                                                                                                              |                                                                                                                                                                                                                                                                                                                                                                                                                                                                                                                              |                                                                                     |  |  |  |  |  |  |  |  |  |  |  |  |  |  |
|          |                                                                                                              |                                                                                                                                                                                                                                                                                                                                                                                                                                                                                                                              |                                                                                     |  |  |  |  |  |  |  |  |  |  |  |  |  |  |
|          |                                                                                                              |                                                                                                                                                                                                                                                                                                                                                                                                                                                                                                                              |                                                                                     |  |  |  |  |  |  |  |  |  |  |  |  |  |  |
|          |                                                                                                              |                                                                                                                                                                                                                                                                                                                                                                                                                                                                                                                              |                                                                                     |  |  |  |  |  |  |  |  |  |  |  |  |  |  |

|                                                                                                                                                                                                                                                               |                                                                                                   | Name all entities with whom you have this relationship or indicate none (add rows as needed)                                                                                                                                                                                                                         | Specifications/Comments (e.g., if payments were made to you or to your institution) |  |  |  |  |  |  |
|---------------------------------------------------------------------------------------------------------------------------------------------------------------------------------------------------------------------------------------------------------------|---------------------------------------------------------------------------------------------------|----------------------------------------------------------------------------------------------------------------------------------------------------------------------------------------------------------------------------------------------------------------------------------------------------------------------|-------------------------------------------------------------------------------------|--|--|--|--|--|--|
| <b>10</b>                                                                                                                                                                                                                                                     | Leadership or fiduciary role in other board, society, committee or advocacy group, paid or unpaid | <input checked="" type="checkbox"/> <b>None</b><br><table border="1" style="width: 100%; border-collapse: collapse;"> <tr><td style="width: 50%; height: 20px;"></td><td style="width: 50%;"></td></tr> <tr><td style="height: 20px;"></td><td></td></tr> <tr><td style="height: 20px;"></td><td></td></tr> </table> |                                                                                     |  |  |  |  |  |  |
|                                                                                                                                                                                                                                                               |                                                                                                   |                                                                                                                                                                                                                                                                                                                      |                                                                                     |  |  |  |  |  |  |
|                                                                                                                                                                                                                                                               |                                                                                                   |                                                                                                                                                                                                                                                                                                                      |                                                                                     |  |  |  |  |  |  |
|                                                                                                                                                                                                                                                               |                                                                                                   |                                                                                                                                                                                                                                                                                                                      |                                                                                     |  |  |  |  |  |  |
| <b>11</b>                                                                                                                                                                                                                                                     | Stock or stock options                                                                            | <input checked="" type="checkbox"/> <b>None</b><br><table border="1" style="width: 100%; border-collapse: collapse;"> <tr><td style="width: 50%; height: 20px;"></td><td style="width: 50%;"></td></tr> <tr><td style="height: 20px;"></td><td></td></tr> <tr><td style="height: 20px;"></td><td></td></tr> </table> |                                                                                     |  |  |  |  |  |  |
|                                                                                                                                                                                                                                                               |                                                                                                   |                                                                                                                                                                                                                                                                                                                      |                                                                                     |  |  |  |  |  |  |
|                                                                                                                                                                                                                                                               |                                                                                                   |                                                                                                                                                                                                                                                                                                                      |                                                                                     |  |  |  |  |  |  |
|                                                                                                                                                                                                                                                               |                                                                                                   |                                                                                                                                                                                                                                                                                                                      |                                                                                     |  |  |  |  |  |  |
| <b>12</b>                                                                                                                                                                                                                                                     | Receipt of equipment, materials, drugs, medical writing, gifts or other services                  | <input checked="" type="checkbox"/> <b>None</b><br><table border="1" style="width: 100%; border-collapse: collapse;"> <tr><td style="width: 50%; height: 20px;"></td><td style="width: 50%;"></td></tr> <tr><td style="height: 20px;"></td><td></td></tr> <tr><td style="height: 20px;"></td><td></td></tr> </table> |                                                                                     |  |  |  |  |  |  |
|                                                                                                                                                                                                                                                               |                                                                                                   |                                                                                                                                                                                                                                                                                                                      |                                                                                     |  |  |  |  |  |  |
|                                                                                                                                                                                                                                                               |                                                                                                   |                                                                                                                                                                                                                                                                                                                      |                                                                                     |  |  |  |  |  |  |
|                                                                                                                                                                                                                                                               |                                                                                                   |                                                                                                                                                                                                                                                                                                                      |                                                                                     |  |  |  |  |  |  |
| <b>13</b>                                                                                                                                                                                                                                                     | Other financial or non-financial interests                                                        | <input checked="" type="checkbox"/> <b>None</b><br><table border="1" style="width: 100%; border-collapse: collapse;"> <tr><td style="width: 50%; height: 20px;"></td><td style="width: 50%;"></td></tr> <tr><td style="height: 20px;"></td><td></td></tr> <tr><td style="height: 20px;"></td><td></td></tr> </table> |                                                                                     |  |  |  |  |  |  |
|                                                                                                                                                                                                                                                               |                                                                                                   |                                                                                                                                                                                                                                                                                                                      |                                                                                     |  |  |  |  |  |  |
|                                                                                                                                                                                                                                                               |                                                                                                   |                                                                                                                                                                                                                                                                                                                      |                                                                                     |  |  |  |  |  |  |
|                                                                                                                                                                                                                                                               |                                                                                                   |                                                                                                                                                                                                                                                                                                                      |                                                                                     |  |  |  |  |  |  |
| <p><b>Please place an "X" next to the following statement to indicate your agreement:</b></p> <p><input checked="" type="checkbox"/> I certify that I have answered every question and have not altered the wording of any of the questions on this form.</p> |                                                                                                   |                                                                                                                                                                                                                                                                                                                      |                                                                                     |  |  |  |  |  |  |

## ICMJE DISCLOSURE FORM

**Date:** 8/7/2023

**Your Name:** Natarajan Ravendhran

**Manuscript Title:** Safety and off-treatment response of patients with chronic hepatitis B virus infection receiving long-term open-label vebicorvir

**Manuscript Number (if known):** [Click or tap here to enter text.](#)

In the interest of transparency, we ask you to disclose all relationships/activities/interests listed below that are related to the content of your manuscript. "Related" means any relation with for-profit or not-for-profit third parties whose interests may be affected by the content of the manuscript. Disclosure represents a commitment to transparency and does not necessarily indicate a bias. If you are in doubt about whether to list a relationship/activity/interest, it is preferable that you do so.

In the interest of transparency, we ask you to disclose all relationships/activities/interests listed below that are related to the content of your manuscript. "Related" means any relation with for-profit or not-for-profit third parties whose interests may be affected by the content of the manuscript. Disclosure represents a commitment to transparency and does not necessarily indicate a bias. If you are in doubt about whether to list a relationship/activity/interest, it is preferable that you do so.

The author's relationships/activities/interests should be defined broadly. For example, if your manuscript pertains to the epidemiology of hypertension, you should declare all relationships with manufacturers of antihypertensive medication, even if that medication is not mentioned in the manuscript.

In item #1 below, report all support for the work reported in this manuscript without time limit. For all other items, the time frame for disclosure is the past 36 months.

|                                                    | Name all entities with whom you have this relationship or indicate none (add rows as needed)                                                                                   | Specifications/Comments (e.g., if payments were made to you or to your institution)                                                                                                                                                                                                                                                                                                                                                        |        |                 |                      |                 |       |  |
|----------------------------------------------------|--------------------------------------------------------------------------------------------------------------------------------------------------------------------------------|--------------------------------------------------------------------------------------------------------------------------------------------------------------------------------------------------------------------------------------------------------------------------------------------------------------------------------------------------------------------------------------------------------------------------------------------|--------|-----------------|----------------------|-----------------|-------|--|
| Time frame: Since the initial planning of the work |                                                                                                                                                                                |                                                                                                                                                                                                                                                                                                                                                                                                                                            |        |                 |                      |                 |       |  |
| <b>1</b>                                           | All support for the present manuscript (e.g., funding, provision of study materials, medical writing, article processing charges, etc.)<br><b>No time limit for this item.</b> | <input checked="" type="checkbox"/> <b>None</b><br><table border="1" style="width: 100%; border-collapse: collapse; margin-top: 5px;"> <tr><td style="height: 15px;"> </td><td style="width: 150px;"> </td></tr> <tr><td style="height: 15px;"> </td><td> </td></tr> <tr><td style="height: 15px;"> </td><td> </td></tr> </table> <p style="font-size: small; color: gray; margin-top: 5px;">Click the tab key to add additional rows.</p> |        |                 |                      |                 |       |  |
|                                                    |                                                                                                                                                                                |                                                                                                                                                                                                                                                                                                                                                                                                                                            |        |                 |                      |                 |       |  |
|                                                    |                                                                                                                                                                                |                                                                                                                                                                                                                                                                                                                                                                                                                                            |        |                 |                      |                 |       |  |
|                                                    |                                                                                                                                                                                |                                                                                                                                                                                                                                                                                                                                                                                                                                            |        |                 |                      |                 |       |  |
| Time frame: past 36 months                         |                                                                                                                                                                                |                                                                                                                                                                                                                                                                                                                                                                                                                                            |        |                 |                      |                 |       |  |
| <b>2</b>                                           | Grants or contracts from any entity (if not indicated in item #1 above).                                                                                                       | <input type="checkbox"/> <b>None</b><br><table border="1" style="width: 100%; border-collapse: collapse; margin-top: 5px;"> <tr><td style="width: 150px;">AbbVie</td><td rowspan="4" style="vertical-align: middle;">Received grants</td></tr> <tr><td>Bristol-Myers Squibb</td></tr> <tr><td>Gilead Sciences</td></tr> <tr><td>Merck</td></tr> </table>                                                                                   | AbbVie | Received grants | Bristol-Myers Squibb | Gilead Sciences | Merck |  |
| AbbVie                                             | Received grants                                                                                                                                                                |                                                                                                                                                                                                                                                                                                                                                                                                                                            |        |                 |                      |                 |       |  |
| Bristol-Myers Squibb                               |                                                                                                                                                                                |                                                                                                                                                                                                                                                                                                                                                                                                                                            |        |                 |                      |                 |       |  |
| Gilead Sciences                                    |                                                                                                                                                                                |                                                                                                                                                                                                                                                                                                                                                                                                                                            |        |                 |                      |                 |       |  |
| Merck                                              |                                                                                                                                                                                |                                                                                                                                                                                                                                                                                                                                                                                                                                            |        |                 |                      |                 |       |  |

|                 |                                                                                                              | Name all entities with whom you have this relationship or indicate none (add rows as needed)                                                                                                                                                                                                                                                                                                                                                                                                                          | Specifications/Comments (e.g., if payments were made to you or to your institution) |                                |                 |      |       |  |  |
|-----------------|--------------------------------------------------------------------------------------------------------------|-----------------------------------------------------------------------------------------------------------------------------------------------------------------------------------------------------------------------------------------------------------------------------------------------------------------------------------------------------------------------------------------------------------------------------------------------------------------------------------------------------------------------|-------------------------------------------------------------------------------------|--------------------------------|-----------------|------|-------|--|--|
| 3               | Royalties or licenses                                                                                        | <input checked="" type="checkbox"/> <b>None</b><br><table border="1" style="width: 100%; border-collapse: collapse;"> <tr><td style="width: 50%; height: 20px;"></td><td style="width: 50%;"></td></tr> <tr><td style="height: 20px;"></td><td></td></tr> <tr><td style="height: 20px;"></td><td></td></tr> </table>                                                                                                                                                                                                  |                                                                                     |                                |                 |      |       |  |  |
|                 |                                                                                                              |                                                                                                                                                                                                                                                                                                                                                                                                                                                                                                                       |                                                                                     |                                |                 |      |       |  |  |
|                 |                                                                                                              |                                                                                                                                                                                                                                                                                                                                                                                                                                                                                                                       |                                                                                     |                                |                 |      |       |  |  |
|                 |                                                                                                              |                                                                                                                                                                                                                                                                                                                                                                                                                                                                                                                       |                                                                                     |                                |                 |      |       |  |  |
| 4               | Consulting fees                                                                                              | <input checked="" type="checkbox"/> <b>None</b><br><table border="1" style="width: 100%; border-collapse: collapse;"> <tr><td style="width: 50%; height: 20px;"></td><td style="width: 50%;"></td></tr> <tr><td style="height: 20px;"></td><td></td></tr> <tr><td style="height: 20px;"></td><td></td></tr> </table>                                                                                                                                                                                                  |                                                                                     |                                |                 |      |       |  |  |
|                 |                                                                                                              |                                                                                                                                                                                                                                                                                                                                                                                                                                                                                                                       |                                                                                     |                                |                 |      |       |  |  |
|                 |                                                                                                              |                                                                                                                                                                                                                                                                                                                                                                                                                                                                                                                       |                                                                                     |                                |                 |      |       |  |  |
|                 |                                                                                                              |                                                                                                                                                                                                                                                                                                                                                                                                                                                                                                                       |                                                                                     |                                |                 |      |       |  |  |
| 5               | Payment or honoraria for lectures, presentations, speakers bureaus, manuscript writing or educational events | <input type="checkbox"/> <b>None</b><br><table border="1" style="width: 100%; border-collapse: collapse;"> <tr> <td style="width: 50%; border-bottom: 1px solid black;">AbbVie</td> <td rowspan="4" style="width: 50%; vertical-align: top;">Being on the speakers' bureau.</td> </tr> <tr> <td style="border-bottom: 1px solid black;">Gilead Sciences</td> </tr> <tr> <td style="border-bottom: 1px solid black;">Onyx</td> </tr> <tr> <td style="border-bottom: 1px solid black;">Salix</td> </tr> </table>        | AbbVie                                                                              | Being on the speakers' bureau. | Gilead Sciences | Onyx | Salix |  |  |
| AbbVie          | Being on the speakers' bureau.                                                                               |                                                                                                                                                                                                                                                                                                                                                                                                                                                                                                                       |                                                                                     |                                |                 |      |       |  |  |
| Gilead Sciences |                                                                                                              |                                                                                                                                                                                                                                                                                                                                                                                                                                                                                                                       |                                                                                     |                                |                 |      |       |  |  |
| Onyx            |                                                                                                              |                                                                                                                                                                                                                                                                                                                                                                                                                                                                                                                       |                                                                                     |                                |                 |      |       |  |  |
| Salix           |                                                                                                              |                                                                                                                                                                                                                                                                                                                                                                                                                                                                                                                       |                                                                                     |                                |                 |      |       |  |  |
| 6               | Payment for expert testimony                                                                                 | <input checked="" type="checkbox"/> <b>None</b><br><table border="1" style="width: 100%; border-collapse: collapse;"> <tr><td style="width: 50%; height: 20px;"></td><td style="width: 50%;"></td></tr> <tr><td style="height: 20px;"></td><td></td></tr> <tr><td style="height: 20px;"></td><td></td></tr> </table>                                                                                                                                                                                                  |                                                                                     |                                |                 |      |       |  |  |
|                 |                                                                                                              |                                                                                                                                                                                                                                                                                                                                                                                                                                                                                                                       |                                                                                     |                                |                 |      |       |  |  |
|                 |                                                                                                              |                                                                                                                                                                                                                                                                                                                                                                                                                                                                                                                       |                                                                                     |                                |                 |      |       |  |  |
|                 |                                                                                                              |                                                                                                                                                                                                                                                                                                                                                                                                                                                                                                                       |                                                                                     |                                |                 |      |       |  |  |
| 7               | Support for attending meetings and/or travel                                                                 | <input checked="" type="checkbox"/> <b>None</b><br><table border="1" style="width: 100%; border-collapse: collapse;"> <tr><td style="width: 50%; height: 20px;"></td><td style="width: 50%;"></td></tr> <tr><td style="height: 20px;"></td><td></td></tr> <tr><td style="height: 20px;"></td><td></td></tr> </table>                                                                                                                                                                                                  |                                                                                     |                                |                 |      |       |  |  |
|                 |                                                                                                              |                                                                                                                                                                                                                                                                                                                                                                                                                                                                                                                       |                                                                                     |                                |                 |      |       |  |  |
|                 |                                                                                                              |                                                                                                                                                                                                                                                                                                                                                                                                                                                                                                                       |                                                                                     |                                |                 |      |       |  |  |
|                 |                                                                                                              |                                                                                                                                                                                                                                                                                                                                                                                                                                                                                                                       |                                                                                     |                                |                 |      |       |  |  |
| 8               | Patents planned, issued or pending                                                                           | <input checked="" type="checkbox"/> <b>None</b><br><table border="1" style="width: 100%; border-collapse: collapse;"> <tr><td style="width: 50%; height: 20px;"></td><td style="width: 50%;"></td></tr> <tr><td style="height: 20px;"></td><td></td></tr> <tr><td style="height: 20px;"></td><td></td></tr> </table>                                                                                                                                                                                                  |                                                                                     |                                |                 |      |       |  |  |
|                 |                                                                                                              |                                                                                                                                                                                                                                                                                                                                                                                                                                                                                                                       |                                                                                     |                                |                 |      |       |  |  |
|                 |                                                                                                              |                                                                                                                                                                                                                                                                                                                                                                                                                                                                                                                       |                                                                                     |                                |                 |      |       |  |  |
|                 |                                                                                                              |                                                                                                                                                                                                                                                                                                                                                                                                                                                                                                                       |                                                                                     |                                |                 |      |       |  |  |
| 9               | Participation on a Data Safety Monitoring Board or Advisory Board                                            | <input type="checkbox"/> <b>None</b><br><table border="1" style="width: 100%; border-collapse: collapse;"> <tr> <td style="width: 50%; border-bottom: 1px solid black;">AbbVie</td> <td style="width: 50%; border-bottom: 1px solid black;">Advising</td> </tr> <tr> <td style="border-bottom: 1px solid black;">Gilead Sciences</td> <td style="border-bottom: 1px solid black;"></td> </tr> <tr> <td style="border-bottom: 1px solid black;"></td> <td style="border-bottom: 1px solid black;"></td> </tr> </table> | AbbVie                                                                              | Advising                       | Gilead Sciences |      |       |  |  |
| AbbVie          | Advising                                                                                                     |                                                                                                                                                                                                                                                                                                                                                                                                                                                                                                                       |                                                                                     |                                |                 |      |       |  |  |
| Gilead Sciences |                                                                                                              |                                                                                                                                                                                                                                                                                                                                                                                                                                                                                                                       |                                                                                     |                                |                 |      |       |  |  |
|                 |                                                                                                              |                                                                                                                                                                                                                                                                                                                                                                                                                                                                                                                       |                                                                                     |                                |                 |      |       |  |  |
| 10              | Leadership or fiduciary role in other board,                                                                 | <input checked="" type="checkbox"/> <b>None</b><br><table border="1" style="width: 100%; border-collapse: collapse;"> <tr><td style="width: 50%; height: 20px;"></td><td style="width: 50%;"></td></tr> </table>                                                                                                                                                                                                                                                                                                      |                                                                                     |                                |                 |      |       |  |  |
|                 |                                                                                                              |                                                                                                                                                                                                                                                                                                                                                                                                                                                                                                                       |                                                                                     |                                |                 |      |       |  |  |

|           |                                                                                  | Name all entities with whom you have this relationship or indicate none (add rows as needed) | Specifications/Comments (e.g., if payments were made to you or to your institution) |
|-----------|----------------------------------------------------------------------------------|----------------------------------------------------------------------------------------------|-------------------------------------------------------------------------------------|
|           | society, committee or advocacy group, paid or unpaid                             |                                                                                              |                                                                                     |
| <b>11</b> | Stock or stock options                                                           | <input checked="" type="checkbox"/> <b>None</b>                                              |                                                                                     |
|           |                                                                                  |                                                                                              |                                                                                     |
|           |                                                                                  |                                                                                              |                                                                                     |
| <b>12</b> | Receipt of equipment, materials, drugs, medical writing, gifts or other services | <input checked="" type="checkbox"/> <b>None</b>                                              |                                                                                     |
|           |                                                                                  |                                                                                              |                                                                                     |
|           |                                                                                  |                                                                                              |                                                                                     |
| <b>13</b> | Other financial or non-financial interests                                       | <input checked="" type="checkbox"/> <b>None</b>                                              |                                                                                     |
|           |                                                                                  |                                                                                              |                                                                                     |
|           |                                                                                  |                                                                                              |                                                                                     |

Please place an "X" next to the following statement to indicate your agreement:

I certify that I have answered every question and have not altered the wording of any of the questions on this form.

## ICMJE DISCLOSURE FORM

**Date:** 8/7/2023

**Your Name:** Sing Chan

**Manuscript Title:** Safety and off-treatment response of patients with chronic hepatitis B virus infection receiving long-term open-label vebicorvir

**Manuscript Number (if known):** [Click or tap here to enter text.](#)

In the interest of transparency, we ask you to disclose all relationships/activities/interests listed below that are related to the content of your manuscript. "Related" means any relation with for-profit or not-for-profit third parties whose interests may be affected by the content of the manuscript. Disclosure represents a commitment to transparency and does not necessarily indicate a bias. If you are in doubt about whether to list a relationship/activity/interest, it is preferable that you do so.

In the interest of transparency, we ask you to disclose all relationships/activities/interests listed below that are related to the content of your manuscript. "Related" means any relation with for-profit or not-for-profit third parties whose interests may be affected by the content of the manuscript. Disclosure represents a commitment to transparency and does not necessarily indicate a bias. If you are in doubt about whether to list a relationship/activity/interest, it is preferable that you do so.

The author's relationships/activities/interests should be defined broadly. For example, if your manuscript pertains to the epidemiology of hypertension, you should declare all relationships with manufacturers of antihypertensive medication, even if that medication is not mentioned in the manuscript.

In item #1 below, report all support for the work reported in this manuscript without time limit. For all other items, the time frame for disclosure is the past 36 months.

|                                                    | Name all entities with whom you have this relationship or indicate none (add rows as needed)                                                                                   | Specifications/Comments (e.g., if payments were made to you or to your institution)                                                                                                                                                                                                                                                                                                          |                      |                                      |  |  |                                           |  |
|----------------------------------------------------|--------------------------------------------------------------------------------------------------------------------------------------------------------------------------------|----------------------------------------------------------------------------------------------------------------------------------------------------------------------------------------------------------------------------------------------------------------------------------------------------------------------------------------------------------------------------------------------|----------------------|--------------------------------------|--|--|-------------------------------------------|--|
| Time frame: Since the initial planning of the work |                                                                                                                                                                                |                                                                                                                                                                                                                                                                                                                                                                                              |                      |                                      |  |  |                                           |  |
| <b>1</b>                                           | All support for the present manuscript (e.g., funding, provision of study materials, medical writing, article processing charges, etc.)<br><b>No time limit for this item.</b> | <input type="checkbox"/> None<br><table border="1" style="width: 100%; border-collapse: collapse; margin-top: 5px;"> <tr> <td style="width: 60%;">Assembly Biosciences</td> <td>All clinical trial related payments.</td> </tr> <tr> <td> </td> <td> </td> </tr> <tr> <td colspan="2" style="text-align: center; color: #ccc;">Click the tab key to add additional rows.</td> </tr> </table> | Assembly Biosciences | All clinical trial related payments. |  |  | Click the tab key to add additional rows. |  |
| Assembly Biosciences                               | All clinical trial related payments.                                                                                                                                           |                                                                                                                                                                                                                                                                                                                                                                                              |                      |                                      |  |  |                                           |  |
|                                                    |                                                                                                                                                                                |                                                                                                                                                                                                                                                                                                                                                                                              |                      |                                      |  |  |                                           |  |
| Click the tab key to add additional rows.          |                                                                                                                                                                                |                                                                                                                                                                                                                                                                                                                                                                                              |                      |                                      |  |  |                                           |  |
| Time frame: past 36 months                         |                                                                                                                                                                                |                                                                                                                                                                                                                                                                                                                                                                                              |                      |                                      |  |  |                                           |  |
| <b>2</b>                                           | Grants or contracts from any entity (if not indicated in item #1 above).                                                                                                       | <input checked="" type="checkbox"/> None<br><table border="1" style="width: 100%; border-collapse: collapse; margin-top: 5px;"> <tr> <td style="width: 60%;"> </td> <td> </td> </tr> <tr> <td> </td> <td> </td> </tr> <tr> <td> </td> <td> </td> </tr> </table>                                                                                                                              |                      |                                      |  |  |                                           |  |
|                                                    |                                                                                                                                                                                |                                                                                                                                                                                                                                                                                                                                                                                              |                      |                                      |  |  |                                           |  |
|                                                    |                                                                                                                                                                                |                                                                                                                                                                                                                                                                                                                                                                                              |                      |                                      |  |  |                                           |  |
|                                                    |                                                                                                                                                                                |                                                                                                                                                                                                                                                                                                                                                                                              |                      |                                      |  |  |                                           |  |



|    |                                                                                                              | Name all entities with whom you have this relationship or indicate none (add rows as needed)                                                                                                                                                                                                                                                                           | Specifications/Comments (e.g., if payments were made to you or to your institution) |  |  |  |  |  |  |  |  |
|----|--------------------------------------------------------------------------------------------------------------|------------------------------------------------------------------------------------------------------------------------------------------------------------------------------------------------------------------------------------------------------------------------------------------------------------------------------------------------------------------------|-------------------------------------------------------------------------------------|--|--|--|--|--|--|--|--|
| 3  | Royalties or licenses                                                                                        | <input checked="" type="checkbox"/> <b>None</b><br><table border="1" style="width: 100%; border-collapse: collapse;"> <tr><td style="width: 50%; height: 20px;"></td><td style="width: 50%;"></td></tr> <tr><td style="height: 20px;"></td><td></td></tr> <tr><td style="height: 20px;"></td><td></td></tr> </table>                                                   |                                                                                     |  |  |  |  |  |  |  |  |
|    |                                                                                                              |                                                                                                                                                                                                                                                                                                                                                                        |                                                                                     |  |  |  |  |  |  |  |  |
|    |                                                                                                              |                                                                                                                                                                                                                                                                                                                                                                        |                                                                                     |  |  |  |  |  |  |  |  |
|    |                                                                                                              |                                                                                                                                                                                                                                                                                                                                                                        |                                                                                     |  |  |  |  |  |  |  |  |
| 4  | Consulting fees                                                                                              | <input checked="" type="checkbox"/> <b>None</b><br><table border="1" style="width: 100%; border-collapse: collapse;"> <tr><td style="width: 50%; height: 20px;"></td><td style="width: 50%;"></td></tr> <tr><td style="height: 20px;"></td><td></td></tr> <tr><td style="height: 20px;"></td><td></td></tr> <tr><td style="height: 20px;"></td><td></td></tr> </table> |                                                                                     |  |  |  |  |  |  |  |  |
|    |                                                                                                              |                                                                                                                                                                                                                                                                                                                                                                        |                                                                                     |  |  |  |  |  |  |  |  |
|    |                                                                                                              |                                                                                                                                                                                                                                                                                                                                                                        |                                                                                     |  |  |  |  |  |  |  |  |
|    |                                                                                                              |                                                                                                                                                                                                                                                                                                                                                                        |                                                                                     |  |  |  |  |  |  |  |  |
|    |                                                                                                              |                                                                                                                                                                                                                                                                                                                                                                        |                                                                                     |  |  |  |  |  |  |  |  |
| 5  | Payment or honoraria for lectures, presentations, speakers bureaus, manuscript writing or educational events | <input checked="" type="checkbox"/> <b>None</b><br><table border="1" style="width: 100%; border-collapse: collapse;"> <tr><td style="width: 50%; height: 20px;"></td><td style="width: 50%;"></td></tr> <tr><td style="height: 20px;"></td><td></td></tr> <tr><td style="height: 20px;"></td><td></td></tr> </table>                                                   |                                                                                     |  |  |  |  |  |  |  |  |
|    |                                                                                                              |                                                                                                                                                                                                                                                                                                                                                                        |                                                                                     |  |  |  |  |  |  |  |  |
|    |                                                                                                              |                                                                                                                                                                                                                                                                                                                                                                        |                                                                                     |  |  |  |  |  |  |  |  |
|    |                                                                                                              |                                                                                                                                                                                                                                                                                                                                                                        |                                                                                     |  |  |  |  |  |  |  |  |
| 6  | Payment for expert testimony                                                                                 | <input checked="" type="checkbox"/> <b>None</b><br><table border="1" style="width: 100%; border-collapse: collapse;"> <tr><td style="width: 50%; height: 20px;"></td><td style="width: 50%;"></td></tr> <tr><td style="height: 20px;"></td><td></td></tr> <tr><td style="height: 20px;"></td><td></td></tr> </table>                                                   |                                                                                     |  |  |  |  |  |  |  |  |
|    |                                                                                                              |                                                                                                                                                                                                                                                                                                                                                                        |                                                                                     |  |  |  |  |  |  |  |  |
|    |                                                                                                              |                                                                                                                                                                                                                                                                                                                                                                        |                                                                                     |  |  |  |  |  |  |  |  |
|    |                                                                                                              |                                                                                                                                                                                                                                                                                                                                                                        |                                                                                     |  |  |  |  |  |  |  |  |
| 7  | Support for attending meetings and/or travel                                                                 | <input checked="" type="checkbox"/> <b>None</b><br><table border="1" style="width: 100%; border-collapse: collapse;"> <tr><td style="width: 50%; height: 20px;"></td><td style="width: 50%;"></td></tr> <tr><td style="height: 20px;"></td><td></td></tr> <tr><td style="height: 20px;"></td><td></td></tr> </table>                                                   |                                                                                     |  |  |  |  |  |  |  |  |
|    |                                                                                                              |                                                                                                                                                                                                                                                                                                                                                                        |                                                                                     |  |  |  |  |  |  |  |  |
|    |                                                                                                              |                                                                                                                                                                                                                                                                                                                                                                        |                                                                                     |  |  |  |  |  |  |  |  |
|    |                                                                                                              |                                                                                                                                                                                                                                                                                                                                                                        |                                                                                     |  |  |  |  |  |  |  |  |
| 8  | Patents planned, issued or pending                                                                           | <input checked="" type="checkbox"/> <b>None</b><br><table border="1" style="width: 100%; border-collapse: collapse;"> <tr><td style="width: 50%; height: 20px;"></td><td style="width: 50%;"></td></tr> <tr><td style="height: 20px;"></td><td></td></tr> <tr><td style="height: 20px;"></td><td></td></tr> </table>                                                   |                                                                                     |  |  |  |  |  |  |  |  |
|    |                                                                                                              |                                                                                                                                                                                                                                                                                                                                                                        |                                                                                     |  |  |  |  |  |  |  |  |
|    |                                                                                                              |                                                                                                                                                                                                                                                                                                                                                                        |                                                                                     |  |  |  |  |  |  |  |  |
|    |                                                                                                              |                                                                                                                                                                                                                                                                                                                                                                        |                                                                                     |  |  |  |  |  |  |  |  |
| 9  | Participation on a Data Safety Monitoring Board or Advisory Board                                            | <input checked="" type="checkbox"/> <b>None</b><br><table border="1" style="width: 100%; border-collapse: collapse;"> <tr><td style="width: 50%; height: 20px;"></td><td style="width: 50%;"></td></tr> <tr><td style="height: 20px;"></td><td></td></tr> <tr><td style="height: 20px;"></td><td></td></tr> </table>                                                   |                                                                                     |  |  |  |  |  |  |  |  |
|    |                                                                                                              |                                                                                                                                                                                                                                                                                                                                                                        |                                                                                     |  |  |  |  |  |  |  |  |
|    |                                                                                                              |                                                                                                                                                                                                                                                                                                                                                                        |                                                                                     |  |  |  |  |  |  |  |  |
|    |                                                                                                              |                                                                                                                                                                                                                                                                                                                                                                        |                                                                                     |  |  |  |  |  |  |  |  |
| 10 | Leadership or fiduciary role in other board,                                                                 | <input checked="" type="checkbox"/> <b>None</b><br><table border="1" style="width: 100%; border-collapse: collapse;"> <tr><td style="width: 50%; height: 20px;"></td><td style="width: 50%;"></td></tr> </table>                                                                                                                                                       |                                                                                     |  |  |  |  |  |  |  |  |
|    |                                                                                                              |                                                                                                                                                                                                                                                                                                                                                                        |                                                                                     |  |  |  |  |  |  |  |  |

|           |                                                                                  | Name all entities with whom you have this relationship or indicate none (add rows as needed) | Specifications/Comments (e.g., if payments were made to you or to your institution) |
|-----------|----------------------------------------------------------------------------------|----------------------------------------------------------------------------------------------|-------------------------------------------------------------------------------------|
|           | society, committee or advocacy group, paid or unpaid                             |                                                                                              |                                                                                     |
| <b>11</b> | Stock or stock options                                                           | <input checked="" type="checkbox"/> <b>None</b>                                              |                                                                                     |
|           |                                                                                  |                                                                                              |                                                                                     |
|           |                                                                                  |                                                                                              |                                                                                     |
| <b>12</b> | Receipt of equipment, materials, drugs, medical writing, gifts or other services | <input checked="" type="checkbox"/> <b>None</b>                                              |                                                                                     |
|           |                                                                                  |                                                                                              |                                                                                     |
|           |                                                                                  |                                                                                              |                                                                                     |
| <b>13</b> | Other financial or non-financial interests                                       | <input checked="" type="checkbox"/> <b>None</b>                                              |                                                                                     |
|           |                                                                                  |                                                                                              |                                                                                     |
|           |                                                                                  |                                                                                              |                                                                                     |

Please place an "X" next to the following statement to indicate your agreement:

I certify that I have answered every question and have not altered the wording of any of the questions on this form.

## ICMJE DISCLOSURE FORM

**Date:** 8/7/2023

**Your Name:** Douglas T Dieterich

**Manuscript Title:** Safety and off-treatment response of patients with chronic hepatitis B virus infection receiving long-term open-label vebicorvir

**Manuscript Number (if known):** [Click or tap here to enter text.](#)

In the interest of transparency, we ask you to disclose all relationships/activities/interests listed below that are related to the content of your manuscript. "Related" means any relation with for-profit or not-for-profit third parties whose interests may be affected by the content of the manuscript. Disclosure represents a commitment to transparency and does not necessarily indicate a bias. If you are in doubt about whether to list a relationship/activity/interest, it is preferable that you do so.

In the interest of transparency, we ask you to disclose all relationships/activities/interests listed below that are related to the content of your manuscript. "Related" means any relation with for-profit or not-for-profit third parties whose interests may be affected by the content of the manuscript. Disclosure represents a commitment to transparency and does not necessarily indicate a bias. If you are in doubt about whether to list a relationship/activity/interest, it is preferable that you do so.

The author's relationships/activities/interests should be defined broadly. For example, if your manuscript pertains to the epidemiology of hypertension, you should declare all relationships with manufacturers of antihypertensive medication, even if that medication is not mentioned in the manuscript.

In item #1 below, report all support for the work reported in this manuscript without time limit. For all other items, the time frame for disclosure is the past 36 months.

|                                                    | Name all entities with whom you have this relationship or indicate none (add rows as needed)                                                                                   | Specifications/Comments (e.g., if payments were made to you or to your institution)                                                                                                                                                                                                                                                                                     |  |  |  |  |  |  |  |  |
|----------------------------------------------------|--------------------------------------------------------------------------------------------------------------------------------------------------------------------------------|-------------------------------------------------------------------------------------------------------------------------------------------------------------------------------------------------------------------------------------------------------------------------------------------------------------------------------------------------------------------------|--|--|--|--|--|--|--|--|
| Time frame: Since the initial planning of the work |                                                                                                                                                                                |                                                                                                                                                                                                                                                                                                                                                                         |  |  |  |  |  |  |  |  |
| <b>1</b>                                           | All support for the present manuscript (e.g., funding, provision of study materials, medical writing, article processing charges, etc.)<br><b>No time limit for this item.</b> | <input checked="" type="checkbox"/> <b>None</b><br><table border="1" style="width: 100%; height: 40px; margin-top: 5px;"> <tr><td style="width: 60%;"></td><td style="width: 40%;"></td></tr> <tr><td></td><td></td></tr> <tr><td></td><td></td></tr> </table> <p style="font-size: small; color: gray; margin-top: 5px;">Click the tab key to add additional rows.</p> |  |  |  |  |  |  |  |  |
|                                                    |                                                                                                                                                                                |                                                                                                                                                                                                                                                                                                                                                                         |  |  |  |  |  |  |  |  |
|                                                    |                                                                                                                                                                                |                                                                                                                                                                                                                                                                                                                                                                         |  |  |  |  |  |  |  |  |
|                                                    |                                                                                                                                                                                |                                                                                                                                                                                                                                                                                                                                                                         |  |  |  |  |  |  |  |  |
| Time frame: past 36 months                         |                                                                                                                                                                                |                                                                                                                                                                                                                                                                                                                                                                         |  |  |  |  |  |  |  |  |
| <b>2</b>                                           | Grants or contracts from any entity (if not indicated in item #1 above).                                                                                                       | <input checked="" type="checkbox"/> <b>None</b><br><table border="1" style="width: 100%; height: 60px; margin-top: 5px;"> <tr><td style="width: 60%;"></td><td style="width: 40%;"></td></tr> <tr><td></td><td></td></tr> <tr><td></td><td></td></tr> <tr><td></td><td></td></tr> </table>                                                                              |  |  |  |  |  |  |  |  |
|                                                    |                                                                                                                                                                                |                                                                                                                                                                                                                                                                                                                                                                         |  |  |  |  |  |  |  |  |
|                                                    |                                                                                                                                                                                |                                                                                                                                                                                                                                                                                                                                                                         |  |  |  |  |  |  |  |  |
|                                                    |                                                                                                                                                                                |                                                                                                                                                                                                                                                                                                                                                                         |  |  |  |  |  |  |  |  |
|                                                    |                                                                                                                                                                                |                                                                                                                                                                                                                                                                                                                                                                         |  |  |  |  |  |  |  |  |

|                           |                                                                                                              | Name all entities with whom you have this relationship or indicate none (add rows as needed)                                                                                                                                                                                                                                                                                                                                                                                                                                                                   | Specifications/Comments (e.g., if payments were made to you or to your institution) |            |                           |  |  |  |  |  |  |
|---------------------------|--------------------------------------------------------------------------------------------------------------|----------------------------------------------------------------------------------------------------------------------------------------------------------------------------------------------------------------------------------------------------------------------------------------------------------------------------------------------------------------------------------------------------------------------------------------------------------------------------------------------------------------------------------------------------------------|-------------------------------------------------------------------------------------|------------|---------------------------|--|--|--|--|--|--|
| 3                         | Royalties or licenses                                                                                        | <input checked="" type="checkbox"/> <b>None</b><br><table border="1" style="width: 100%; border-collapse: collapse;"> <tr><td style="width: 50%; height: 20px;"></td><td style="width: 50%;"></td></tr> <tr><td style="height: 20px;"></td><td></td></tr> <tr><td style="height: 20px;"></td><td></td></tr> </table>                                                                                                                                                                                                                                           |                                                                                     |            |                           |  |  |  |  |  |  |
|                           |                                                                                                              |                                                                                                                                                                                                                                                                                                                                                                                                                                                                                                                                                                |                                                                                     |            |                           |  |  |  |  |  |  |
|                           |                                                                                                              |                                                                                                                                                                                                                                                                                                                                                                                                                                                                                                                                                                |                                                                                     |            |                           |  |  |  |  |  |  |
|                           |                                                                                                              |                                                                                                                                                                                                                                                                                                                                                                                                                                                                                                                                                                |                                                                                     |            |                           |  |  |  |  |  |  |
| 4                         | Consulting fees                                                                                              | <input type="checkbox"/> <b>None</b><br><table border="1" style="width: 100%; border-collapse: collapse;"> <tr> <td style="width: 50%; border-bottom: 1px solid black;">Gilead Sciences</td> <td rowspan="5" style="width: 50%; vertical-align: top;">Consultant</td> </tr> <tr> <td style="border-bottom: 1px solid black;">Intercept Pharmaceuticals</td> </tr> <tr><td style="border-bottom: 1px solid black;"> </td></tr> <tr><td style="border-bottom: 1px solid black;"> </td></tr> <tr><td style="border-bottom: 1px solid black;"> </td></tr> </table> | Gilead Sciences                                                                     | Consultant | Intercept Pharmaceuticals |  |  |  |  |  |  |
| Gilead Sciences           | Consultant                                                                                                   |                                                                                                                                                                                                                                                                                                                                                                                                                                                                                                                                                                |                                                                                     |            |                           |  |  |  |  |  |  |
| Intercept Pharmaceuticals |                                                                                                              |                                                                                                                                                                                                                                                                                                                                                                                                                                                                                                                                                                |                                                                                     |            |                           |  |  |  |  |  |  |
|                           |                                                                                                              |                                                                                                                                                                                                                                                                                                                                                                                                                                                                                                                                                                |                                                                                     |            |                           |  |  |  |  |  |  |
|                           |                                                                                                              |                                                                                                                                                                                                                                                                                                                                                                                                                                                                                                                                                                |                                                                                     |            |                           |  |  |  |  |  |  |
|                           |                                                                                                              |                                                                                                                                                                                                                                                                                                                                                                                                                                                                                                                                                                |                                                                                     |            |                           |  |  |  |  |  |  |
| 5                         | Payment or honoraria for lectures, presentations, speakers bureaus, manuscript writing or educational events | <input checked="" type="checkbox"/> <b>None</b><br><table border="1" style="width: 100%; border-collapse: collapse;"> <tr><td style="width: 50%; height: 20px;"></td><td style="width: 50%;"></td></tr> <tr><td style="height: 20px;"></td><td></td></tr> <tr><td style="height: 20px;"></td><td></td></tr> </table>                                                                                                                                                                                                                                           |                                                                                     |            |                           |  |  |  |  |  |  |
|                           |                                                                                                              |                                                                                                                                                                                                                                                                                                                                                                                                                                                                                                                                                                |                                                                                     |            |                           |  |  |  |  |  |  |
|                           |                                                                                                              |                                                                                                                                                                                                                                                                                                                                                                                                                                                                                                                                                                |                                                                                     |            |                           |  |  |  |  |  |  |
|                           |                                                                                                              |                                                                                                                                                                                                                                                                                                                                                                                                                                                                                                                                                                |                                                                                     |            |                           |  |  |  |  |  |  |
| 6                         | Payment for expert testimony                                                                                 | <input checked="" type="checkbox"/> <b>None</b><br><table border="1" style="width: 100%; border-collapse: collapse;"> <tr><td style="width: 50%; height: 20px;"></td><td style="width: 50%;"></td></tr> <tr><td style="height: 20px;"></td><td></td></tr> <tr><td style="height: 20px;"></td><td></td></tr> </table>                                                                                                                                                                                                                                           |                                                                                     |            |                           |  |  |  |  |  |  |
|                           |                                                                                                              |                                                                                                                                                                                                                                                                                                                                                                                                                                                                                                                                                                |                                                                                     |            |                           |  |  |  |  |  |  |
|                           |                                                                                                              |                                                                                                                                                                                                                                                                                                                                                                                                                                                                                                                                                                |                                                                                     |            |                           |  |  |  |  |  |  |
|                           |                                                                                                              |                                                                                                                                                                                                                                                                                                                                                                                                                                                                                                                                                                |                                                                                     |            |                           |  |  |  |  |  |  |
| 7                         | Support for attending meetings and/or travel                                                                 | <input checked="" type="checkbox"/> <b>None</b><br><table border="1" style="width: 100%; border-collapse: collapse;"> <tr><td style="width: 50%; height: 20px;"></td><td style="width: 50%;"></td></tr> <tr><td style="height: 20px;"></td><td></td></tr> <tr><td style="height: 20px;"></td><td></td></tr> </table>                                                                                                                                                                                                                                           |                                                                                     |            |                           |  |  |  |  |  |  |
|                           |                                                                                                              |                                                                                                                                                                                                                                                                                                                                                                                                                                                                                                                                                                |                                                                                     |            |                           |  |  |  |  |  |  |
|                           |                                                                                                              |                                                                                                                                                                                                                                                                                                                                                                                                                                                                                                                                                                |                                                                                     |            |                           |  |  |  |  |  |  |
|                           |                                                                                                              |                                                                                                                                                                                                                                                                                                                                                                                                                                                                                                                                                                |                                                                                     |            |                           |  |  |  |  |  |  |
| 8                         | Patents planned, issued or pending                                                                           | <input checked="" type="checkbox"/> <b>None</b><br><table border="1" style="width: 100%; border-collapse: collapse;"> <tr><td style="width: 50%; height: 20px;"></td><td style="width: 50%;"></td></tr> <tr><td style="height: 20px;"></td><td></td></tr> <tr><td style="height: 20px;"></td><td></td></tr> </table>                                                                                                                                                                                                                                           |                                                                                     |            |                           |  |  |  |  |  |  |
|                           |                                                                                                              |                                                                                                                                                                                                                                                                                                                                                                                                                                                                                                                                                                |                                                                                     |            |                           |  |  |  |  |  |  |
|                           |                                                                                                              |                                                                                                                                                                                                                                                                                                                                                                                                                                                                                                                                                                |                                                                                     |            |                           |  |  |  |  |  |  |
|                           |                                                                                                              |                                                                                                                                                                                                                                                                                                                                                                                                                                                                                                                                                                |                                                                                     |            |                           |  |  |  |  |  |  |
| 9                         | Participation on a Data Safety Monitoring Board or Advisory Board                                            | <input checked="" type="checkbox"/> <b>None</b><br><table border="1" style="width: 100%; border-collapse: collapse;"> <tr><td style="width: 50%; height: 20px;"></td><td style="width: 50%;"></td></tr> <tr><td style="height: 20px;"></td><td></td></tr> <tr><td style="height: 20px;"></td><td></td></tr> <tr><td style="height: 20px;"></td><td></td></tr> </table>                                                                                                                                                                                         |                                                                                     |            |                           |  |  |  |  |  |  |
|                           |                                                                                                              |                                                                                                                                                                                                                                                                                                                                                                                                                                                                                                                                                                |                                                                                     |            |                           |  |  |  |  |  |  |
|                           |                                                                                                              |                                                                                                                                                                                                                                                                                                                                                                                                                                                                                                                                                                |                                                                                     |            |                           |  |  |  |  |  |  |
|                           |                                                                                                              |                                                                                                                                                                                                                                                                                                                                                                                                                                                                                                                                                                |                                                                                     |            |                           |  |  |  |  |  |  |
|                           |                                                                                                              |                                                                                                                                                                                                                                                                                                                                                                                                                                                                                                                                                                |                                                                                     |            |                           |  |  |  |  |  |  |

|                                                                                                                                                                                                                                                               |                                                                                                   | Name all entities with whom you have this relationship or indicate none (add rows as needed)                                                                                                     | Specifications/Comments (e.g., if payments were made to you or to your institution) |  |  |  |  |  |  |
|---------------------------------------------------------------------------------------------------------------------------------------------------------------------------------------------------------------------------------------------------------------|---------------------------------------------------------------------------------------------------|--------------------------------------------------------------------------------------------------------------------------------------------------------------------------------------------------|-------------------------------------------------------------------------------------|--|--|--|--|--|--|
| <b>10</b>                                                                                                                                                                                                                                                     | Leadership or fiduciary role in other board, society, committee or advocacy group, paid or unpaid | <input checked="" type="checkbox"/> <b>None</b><br><table border="1" data-bbox="383 260 1516 359"> <tr><td></td><td></td></tr> <tr><td></td><td></td></tr> <tr><td></td><td></td></tr> </table>  |                                                                                     |  |  |  |  |  |  |
|                                                                                                                                                                                                                                                               |                                                                                                   |                                                                                                                                                                                                  |                                                                                     |  |  |  |  |  |  |
|                                                                                                                                                                                                                                                               |                                                                                                   |                                                                                                                                                                                                  |                                                                                     |  |  |  |  |  |  |
|                                                                                                                                                                                                                                                               |                                                                                                   |                                                                                                                                                                                                  |                                                                                     |  |  |  |  |  |  |
| <b>11</b>                                                                                                                                                                                                                                                     | Stock or stock options                                                                            | <input checked="" type="checkbox"/> <b>None</b><br><table border="1" data-bbox="383 506 1516 604"> <tr><td></td><td></td></tr> <tr><td></td><td></td></tr> <tr><td></td><td></td></tr> </table>  |                                                                                     |  |  |  |  |  |  |
|                                                                                                                                                                                                                                                               |                                                                                                   |                                                                                                                                                                                                  |                                                                                     |  |  |  |  |  |  |
|                                                                                                                                                                                                                                                               |                                                                                                   |                                                                                                                                                                                                  |                                                                                     |  |  |  |  |  |  |
|                                                                                                                                                                                                                                                               |                                                                                                   |                                                                                                                                                                                                  |                                                                                     |  |  |  |  |  |  |
| <b>12</b>                                                                                                                                                                                                                                                     | Receipt of equipment, materials, drugs, medical writing, gifts or other services                  | <input checked="" type="checkbox"/> <b>None</b><br><table border="1" data-bbox="383 722 1516 821"> <tr><td></td><td></td></tr> <tr><td></td><td></td></tr> <tr><td></td><td></td></tr> </table>  |                                                                                     |  |  |  |  |  |  |
|                                                                                                                                                                                                                                                               |                                                                                                   |                                                                                                                                                                                                  |                                                                                     |  |  |  |  |  |  |
|                                                                                                                                                                                                                                                               |                                                                                                   |                                                                                                                                                                                                  |                                                                                     |  |  |  |  |  |  |
|                                                                                                                                                                                                                                                               |                                                                                                   |                                                                                                                                                                                                  |                                                                                     |  |  |  |  |  |  |
| <b>13</b>                                                                                                                                                                                                                                                     | Other financial or non-financial interests                                                        | <input checked="" type="checkbox"/> <b>None</b><br><table border="1" data-bbox="383 938 1516 1037"> <tr><td></td><td></td></tr> <tr><td></td><td></td></tr> <tr><td></td><td></td></tr> </table> |                                                                                     |  |  |  |  |  |  |
|                                                                                                                                                                                                                                                               |                                                                                                   |                                                                                                                                                                                                  |                                                                                     |  |  |  |  |  |  |
|                                                                                                                                                                                                                                                               |                                                                                                   |                                                                                                                                                                                                  |                                                                                     |  |  |  |  |  |  |
|                                                                                                                                                                                                                                                               |                                                                                                   |                                                                                                                                                                                                  |                                                                                     |  |  |  |  |  |  |
| <p><b>Please place an "X" next to the following statement to indicate your agreement:</b></p> <p><input checked="" type="checkbox"/> I certify that I have answered every question and have not altered the wording of any of the questions on this form.</p> |                                                                                                   |                                                                                                                                                                                                  |                                                                                     |  |  |  |  |  |  |

## ICMJE DISCLOSURE FORM

**Date:** 8/7/2023

**Your Name:** Paul Yien Kwo

**Manuscript Title:** Safety and off-treatment response of patients with chronic hepatitis B virus infection receiving long-term open-label vebicorvir

**Manuscript Number (if known):** [Click or tap here to enter text.](#)

In the interest of transparency, we ask you to disclose all relationships/activities/interests listed below that are related to the content of your manuscript. "Related" means any relation with for-profit or not-for-profit third parties whose interests may be affected by the content of the manuscript. Disclosure represents a commitment to transparency and does not necessarily indicate a bias. If you are in doubt about whether to list a relationship/activity/interest, it is preferable that you do so.

In the interest of transparency, we ask you to disclose all relationships/activities/interests listed below that are related to the content of your manuscript. "Related" means any relation with for-profit or not-for-profit third parties whose interests may be affected by the content of the manuscript. Disclosure represents a commitment to transparency and does not necessarily indicate a bias. If you are in doubt about whether to list a relationship/activity/interest, it is preferable that you do so.

The author's relationships/activities/interests should be defined broadly. For example, if your manuscript pertains to the epidemiology of hypertension, you should declare all relationships with manufacturers of antihypertensive medication, even if that medication is not mentioned in the manuscript.

In item #1 below, report all support for the work reported in this manuscript without time limit. For all other items, the time frame for disclosure is the past 36 months.

|                                                    | Name all entities with whom you have this relationship or indicate none (add rows as needed)                                                                                   | Specifications/Comments (e.g., if payments were made to you or to your institution)                                                                                                                                                                                                                                                                                                                                                                       |                      |                        |                           |  |                                           |  |                          |  |                   |  |  |  |
|----------------------------------------------------|--------------------------------------------------------------------------------------------------------------------------------------------------------------------------------|-----------------------------------------------------------------------------------------------------------------------------------------------------------------------------------------------------------------------------------------------------------------------------------------------------------------------------------------------------------------------------------------------------------------------------------------------------------|----------------------|------------------------|---------------------------|--|-------------------------------------------|--|--------------------------|--|-------------------|--|--|--|
| Time frame: Since the initial planning of the work |                                                                                                                                                                                |                                                                                                                                                                                                                                                                                                                                                                                                                                                           |                      |                        |                           |  |                                           |  |                          |  |                   |  |  |  |
| <b>1</b>                                           | All support for the present manuscript (e.g., funding, provision of study materials, medical writing, article processing charges, etc.)<br><b>No time limit for this item.</b> | <input type="checkbox"/> None<br><br><table border="1" style="width: 100%; border-collapse: collapse;"> <tr> <td style="width: 60%;">Assembly Biosciences</td> <td>Grant/research support</td> </tr> <tr> <td> </td> <td> </td> </tr> <tr> <td colspan="2" style="text-align: center; color: gray;">Click the tab key to add additional rows.</td> </tr> </table>                                                                                         | Assembly Biosciences | Grant/research support |                           |  | Click the tab key to add additional rows. |  |                          |  |                   |  |  |  |
| Assembly Biosciences                               | Grant/research support                                                                                                                                                         |                                                                                                                                                                                                                                                                                                                                                                                                                                                           |                      |                        |                           |  |                                           |  |                          |  |                   |  |  |  |
|                                                    |                                                                                                                                                                                |                                                                                                                                                                                                                                                                                                                                                                                                                                                           |                      |                        |                           |  |                                           |  |                          |  |                   |  |  |  |
| Click the tab key to add additional rows.          |                                                                                                                                                                                |                                                                                                                                                                                                                                                                                                                                                                                                                                                           |                      |                        |                           |  |                                           |  |                          |  |                   |  |  |  |
| Time frame: past 36 months                         |                                                                                                                                                                                |                                                                                                                                                                                                                                                                                                                                                                                                                                                           |                      |                        |                           |  |                                           |  |                          |  |                   |  |  |  |
| <b>2</b>                                           | Grants or contracts from any entity (if not indicated in item #1 above).                                                                                                       | <input type="checkbox"/> None<br><br><table border="1" style="width: 100%; border-collapse: collapse;"> <tr> <td style="width: 60%;">Altimmune</td> <td>Grant/Research support</td> </tr> <tr> <td>Arrowhead Pharmaceuticals</td> <td> </td> </tr> <tr> <td>Bristol-Myers Squibb</td> <td> </td> </tr> <tr> <td>Eiger Biopharmaceuticals</td> <td> </td> </tr> <tr> <td>Target Registries</td> <td> </td> </tr> <tr> <td> </td> <td> </td> </tr> </table> | Altimmune            | Grant/Research support | Arrowhead Pharmaceuticals |  | Bristol-Myers Squibb                      |  | Eiger Biopharmaceuticals |  | Target Registries |  |  |  |
| Altimmune                                          | Grant/Research support                                                                                                                                                         |                                                                                                                                                                                                                                                                                                                                                                                                                                                           |                      |                        |                           |  |                                           |  |                          |  |                   |  |  |  |
| Arrowhead Pharmaceuticals                          |                                                                                                                                                                                |                                                                                                                                                                                                                                                                                                                                                                                                                                                           |                      |                        |                           |  |                                           |  |                          |  |                   |  |  |  |
| Bristol-Myers Squibb                               |                                                                                                                                                                                |                                                                                                                                                                                                                                                                                                                                                                                                                                                           |                      |                        |                           |  |                                           |  |                          |  |                   |  |  |  |
| Eiger Biopharmaceuticals                           |                                                                                                                                                                                |                                                                                                                                                                                                                                                                                                                                                                                                                                                           |                      |                        |                           |  |                                           |  |                          |  |                   |  |  |  |
| Target Registries                                  |                                                                                                                                                                                |                                                                                                                                                                                                                                                                                                                                                                                                                                                           |                      |                        |                           |  |                                           |  |                          |  |                   |  |  |  |
|                                                    |                                                                                                                                                                                |                                                                                                                                                                                                                                                                                                                                                                                                                                                           |                      |                        |                           |  |                                           |  |                          |  |                   |  |  |  |

|                        |                                                                                                              | Name all entities with whom you have this relationship or indicate none (add rows as needed)                                                                                                                                                                                                                                                                                                                                                                                            | Specifications/Comments (e.g., if payments were made to you or to your institution) |            |                     |  |                     |  |                        |  |                 |  |         |  |  |  |  |
|------------------------|--------------------------------------------------------------------------------------------------------------|-----------------------------------------------------------------------------------------------------------------------------------------------------------------------------------------------------------------------------------------------------------------------------------------------------------------------------------------------------------------------------------------------------------------------------------------------------------------------------------------|-------------------------------------------------------------------------------------|------------|---------------------|--|---------------------|--|------------------------|--|-----------------|--|---------|--|--|--|--|
| <b>3</b>               | Royalties or licenses                                                                                        | <input checked="" type="checkbox"/> <b>None</b><br><table border="1" style="width: 100%; border-collapse: collapse;"> <tr><td style="width: 50%; height: 20px;"></td><td style="width: 50%;"></td></tr> <tr><td style="height: 20px;"></td><td></td></tr> <tr><td style="height: 20px;"></td><td></td></tr> </table>                                                                                                                                                                    |                                                                                     |            |                     |  |                     |  |                        |  |                 |  |         |  |  |  |  |
|                        |                                                                                                              |                                                                                                                                                                                                                                                                                                                                                                                                                                                                                         |                                                                                     |            |                     |  |                     |  |                        |  |                 |  |         |  |  |  |  |
|                        |                                                                                                              |                                                                                                                                                                                                                                                                                                                                                                                                                                                                                         |                                                                                     |            |                     |  |                     |  |                        |  |                 |  |         |  |  |  |  |
|                        |                                                                                                              |                                                                                                                                                                                                                                                                                                                                                                                                                                                                                         |                                                                                     |            |                     |  |                     |  |                        |  |                 |  |         |  |  |  |  |
| <b>4</b>               | Consulting fees                                                                                              | <input type="checkbox"/> <b>None</b><br><table border="1" style="width: 100%; border-collapse: collapse;"> <tr><td style="width: 50%;">AbbVie</td><td style="width: 50%;">Consultant</td></tr> <tr><td>Aligos Therapeutics</td><td></td></tr> <tr><td>Antios Therapeutics</td><td></td></tr> <tr><td>Enanta Pharmaceuticals</td><td></td></tr> <tr><td>Gilead Sciences</td><td></td></tr> <tr><td>Janssen</td><td></td></tr> <tr><td style="height: 20px;"></td><td></td></tr> </table> | AbbVie                                                                              | Consultant | Aligos Therapeutics |  | Antios Therapeutics |  | Enanta Pharmaceuticals |  | Gilead Sciences |  | Janssen |  |  |  |  |
| AbbVie                 | Consultant                                                                                                   |                                                                                                                                                                                                                                                                                                                                                                                                                                                                                         |                                                                                     |            |                     |  |                     |  |                        |  |                 |  |         |  |  |  |  |
| Aligos Therapeutics    |                                                                                                              |                                                                                                                                                                                                                                                                                                                                                                                                                                                                                         |                                                                                     |            |                     |  |                     |  |                        |  |                 |  |         |  |  |  |  |
| Antios Therapeutics    |                                                                                                              |                                                                                                                                                                                                                                                                                                                                                                                                                                                                                         |                                                                                     |            |                     |  |                     |  |                        |  |                 |  |         |  |  |  |  |
| Enanta Pharmaceuticals |                                                                                                              |                                                                                                                                                                                                                                                                                                                                                                                                                                                                                         |                                                                                     |            |                     |  |                     |  |                        |  |                 |  |         |  |  |  |  |
| Gilead Sciences        |                                                                                                              |                                                                                                                                                                                                                                                                                                                                                                                                                                                                                         |                                                                                     |            |                     |  |                     |  |                        |  |                 |  |         |  |  |  |  |
| Janssen                |                                                                                                              |                                                                                                                                                                                                                                                                                                                                                                                                                                                                                         |                                                                                     |            |                     |  |                     |  |                        |  |                 |  |         |  |  |  |  |
|                        |                                                                                                              |                                                                                                                                                                                                                                                                                                                                                                                                                                                                                         |                                                                                     |            |                     |  |                     |  |                        |  |                 |  |         |  |  |  |  |
| <b>5</b>               | Payment or honoraria for lectures, presentations, speakers bureaus, manuscript writing or educational events | <input checked="" type="checkbox"/> <b>None</b><br><table border="1" style="width: 100%; border-collapse: collapse;"> <tr><td style="width: 50%; height: 20px;"></td><td style="width: 50%;"></td></tr> <tr><td style="height: 20px;"></td><td></td></tr> <tr><td style="height: 20px;"></td><td></td></tr> </table>                                                                                                                                                                    |                                                                                     |            |                     |  |                     |  |                        |  |                 |  |         |  |  |  |  |
|                        |                                                                                                              |                                                                                                                                                                                                                                                                                                                                                                                                                                                                                         |                                                                                     |            |                     |  |                     |  |                        |  |                 |  |         |  |  |  |  |
|                        |                                                                                                              |                                                                                                                                                                                                                                                                                                                                                                                                                                                                                         |                                                                                     |            |                     |  |                     |  |                        |  |                 |  |         |  |  |  |  |
|                        |                                                                                                              |                                                                                                                                                                                                                                                                                                                                                                                                                                                                                         |                                                                                     |            |                     |  |                     |  |                        |  |                 |  |         |  |  |  |  |
| <b>6</b>               | Payment for expert testimony                                                                                 | <input checked="" type="checkbox"/> <b>None</b><br><table border="1" style="width: 100%; border-collapse: collapse;"> <tr><td style="width: 50%; height: 20px;"></td><td style="width: 50%;"></td></tr> <tr><td style="height: 20px;"></td><td></td></tr> <tr><td style="height: 20px;"></td><td></td></tr> </table>                                                                                                                                                                    |                                                                                     |            |                     |  |                     |  |                        |  |                 |  |         |  |  |  |  |
|                        |                                                                                                              |                                                                                                                                                                                                                                                                                                                                                                                                                                                                                         |                                                                                     |            |                     |  |                     |  |                        |  |                 |  |         |  |  |  |  |
|                        |                                                                                                              |                                                                                                                                                                                                                                                                                                                                                                                                                                                                                         |                                                                                     |            |                     |  |                     |  |                        |  |                 |  |         |  |  |  |  |
|                        |                                                                                                              |                                                                                                                                                                                                                                                                                                                                                                                                                                                                                         |                                                                                     |            |                     |  |                     |  |                        |  |                 |  |         |  |  |  |  |
| <b>7</b>               | Support for attending meetings and/or travel                                                                 | <input checked="" type="checkbox"/> <b>None</b><br><table border="1" style="width: 100%; border-collapse: collapse;"> <tr><td style="width: 50%; height: 20px;"></td><td style="width: 50%;"></td></tr> <tr><td style="height: 20px;"></td><td></td></tr> <tr><td style="height: 20px;"></td><td></td></tr> </table>                                                                                                                                                                    |                                                                                     |            |                     |  |                     |  |                        |  |                 |  |         |  |  |  |  |
|                        |                                                                                                              |                                                                                                                                                                                                                                                                                                                                                                                                                                                                                         |                                                                                     |            |                     |  |                     |  |                        |  |                 |  |         |  |  |  |  |
|                        |                                                                                                              |                                                                                                                                                                                                                                                                                                                                                                                                                                                                                         |                                                                                     |            |                     |  |                     |  |                        |  |                 |  |         |  |  |  |  |
|                        |                                                                                                              |                                                                                                                                                                                                                                                                                                                                                                                                                                                                                         |                                                                                     |            |                     |  |                     |  |                        |  |                 |  |         |  |  |  |  |
| <b>8</b>               | Patents planned, issued or pending                                                                           | <input checked="" type="checkbox"/> <b>None</b><br><table border="1" style="width: 100%; border-collapse: collapse;"> <tr><td style="width: 50%; height: 20px;"></td><td style="width: 50%;"></td></tr> <tr><td style="height: 20px;"></td><td></td></tr> <tr><td style="height: 20px;"></td><td></td></tr> </table>                                                                                                                                                                    |                                                                                     |            |                     |  |                     |  |                        |  |                 |  |         |  |  |  |  |
|                        |                                                                                                              |                                                                                                                                                                                                                                                                                                                                                                                                                                                                                         |                                                                                     |            |                     |  |                     |  |                        |  |                 |  |         |  |  |  |  |
|                        |                                                                                                              |                                                                                                                                                                                                                                                                                                                                                                                                                                                                                         |                                                                                     |            |                     |  |                     |  |                        |  |                 |  |         |  |  |  |  |
|                        |                                                                                                              |                                                                                                                                                                                                                                                                                                                                                                                                                                                                                         |                                                                                     |            |                     |  |                     |  |                        |  |                 |  |         |  |  |  |  |
| <b>9</b>               | Participation on a Data Safety Monitoring Board or Advisory Board                                            | <input type="checkbox"/> <b>None</b><br><table border="1" style="width: 100%; border-collapse: collapse;"> <tr><td style="width: 50%;">AbbVie</td><td style="width: 50%;">Advisor</td></tr> <tr><td>Aligos Therapeutics</td><td></td></tr> <tr><td>Antios Therapeutics</td><td></td></tr> <tr><td>Enanta Pharmaceuticals</td><td></td></tr> </table>                                                                                                                                    | AbbVie                                                                              | Advisor    | Aligos Therapeutics |  | Antios Therapeutics |  | Enanta Pharmaceuticals |  |                 |  |         |  |  |  |  |
| AbbVie                 | Advisor                                                                                                      |                                                                                                                                                                                                                                                                                                                                                                                                                                                                                         |                                                                                     |            |                     |  |                     |  |                        |  |                 |  |         |  |  |  |  |
| Aligos Therapeutics    |                                                                                                              |                                                                                                                                                                                                                                                                                                                                                                                                                                                                                         |                                                                                     |            |                     |  |                     |  |                        |  |                 |  |         |  |  |  |  |
| Antios Therapeutics    |                                                                                                              |                                                                                                                                                                                                                                                                                                                                                                                                                                                                                         |                                                                                     |            |                     |  |                     |  |                        |  |                 |  |         |  |  |  |  |
| Enanta Pharmaceuticals |                                                                                                              |                                                                                                                                                                                                                                                                                                                                                                                                                                                                                         |                                                                                     |            |                     |  |                     |  |                        |  |                 |  |         |  |  |  |  |

|           |                                                                                                   | Name all entities with whom you have this relationship or indicate none (add rows as needed) | Specifications/Comments (e.g., if payments were made to you or to your institution) |
|-----------|---------------------------------------------------------------------------------------------------|----------------------------------------------------------------------------------------------|-------------------------------------------------------------------------------------|
|           |                                                                                                   | Gilead Sciences<br>Janssen                                                                   |                                                                                     |
| <b>10</b> | Leadership or fiduciary role in other board, society, committee or advocacy group, paid or unpaid | <input checked="" type="checkbox"/> <b>None</b>                                              |                                                                                     |
|           |                                                                                                   |                                                                                              |                                                                                     |
|           |                                                                                                   |                                                                                              |                                                                                     |
| <b>11</b> | Stock or stock options                                                                            | <input checked="" type="checkbox"/> <b>None</b>                                              |                                                                                     |
|           |                                                                                                   |                                                                                              |                                                                                     |
|           |                                                                                                   |                                                                                              |                                                                                     |
| <b>12</b> | Receipt of equipment, materials, drugs, medical writing, gifts or other services                  | <input checked="" type="checkbox"/> <b>None</b>                                              |                                                                                     |
|           |                                                                                                   |                                                                                              |                                                                                     |
|           |                                                                                                   |                                                                                              |                                                                                     |
| <b>13</b> | Other financial or non-financial interests                                                        | <input checked="" type="checkbox"/> <b>None</b>                                              |                                                                                     |
|           |                                                                                                   |                                                                                              |                                                                                     |
|           |                                                                                                   |                                                                                              |                                                                                     |

Please place an "X" next to the following statement to indicate your agreement:

I certify that I have answered every question and have not altered the wording of any of the questions on this form.



## ICMJE DISCLOSURE FORM

**Date:** 8/7/2023

**Your Name:** Eugene R Schiff

**Manuscript Title:** Safety and off-treatment response of patients with chronic hepatitis B virus infection receiving long-term open-label vebicorvir

**Manuscript Number (if known):** Click or tap here to enter text.

In the interest of transparency, we ask you to disclose all relationships/activities/interests listed below that are related to the content of your manuscript. "Related" means any relation with for-profit or not-for-profit third parties whose interests may be affected by the content of the manuscript. Disclosure represents a commitment to transparency and does not necessarily indicate a bias. If you are in doubt about whether to list a relationship/activity/interest, it is preferable that you do so.

In the interest of transparency, we ask you to disclose all relationships/activities/interests listed below that are related to the content of your manuscript. "Related" means any relation with for-profit or not-for-profit third parties whose interests may be affected by the content of the manuscript. Disclosure represents a commitment to transparency and does not necessarily indicate a bias. If you are in doubt about whether to list a relationship/activity/interest, it is preferable that you do so.

The author's relationships/activities/interests should be defined broadly. For example, if your manuscript pertains to the epidemiology of hypertension, you should declare all relationships with manufacturers of antihypertensive medication, even if that medication is not mentioned in the manuscript.

In item #1 below, report all support for the work reported in this manuscript without time limit. For all other items, the time frame for disclosure is the past 36 months.

|                                                           |                                                                                                                                                                                | Name all entities with whom you have this relationship or indicate none (add rows as needed)                                                                                                                                                                                                                                                      | Specifications/Comments (e.g., if payments were made to you or to your institution) |                            |         |  |                                |  |                                                                                                                |  |  |
|-----------------------------------------------------------|--------------------------------------------------------------------------------------------------------------------------------------------------------------------------------|---------------------------------------------------------------------------------------------------------------------------------------------------------------------------------------------------------------------------------------------------------------------------------------------------------------------------------------------------|-------------------------------------------------------------------------------------|----------------------------|---------|--|--------------------------------|--|----------------------------------------------------------------------------------------------------------------|--|--|
| <b>Time frame: Since the initial planning of the work</b> |                                                                                                                                                                                |                                                                                                                                                                                                                                                                                                                                                   |                                                                                     |                            |         |  |                                |  |                                                                                                                |  |  |
| <b>1</b>                                                  | All support for the present manuscript (e.g., funding, provision of study materials, medical writing, article processing charges, etc.)<br><b>No time limit for this item.</b> | <input checked="" type="checkbox"/> <b>None</b><br><table border="1" style="width: 100%; height: 40px; margin-top: 5px;"> <tr><td style="width: 60%;"></td><td></td></tr> <tr><td></td><td></td></tr> <tr><td></td><td></td></tr> </table>                                                                                                        |                                                                                     |                            |         |  |                                |  | <div style="font-size: small; color: gray; text-align: right;">Click the tab key to add additional rows.</div> |  |  |
|                                                           |                                                                                                                                                                                |                                                                                                                                                                                                                                                                                                                                                   |                                                                                     |                            |         |  |                                |  |                                                                                                                |  |  |
|                                                           |                                                                                                                                                                                |                                                                                                                                                                                                                                                                                                                                                   |                                                                                     |                            |         |  |                                |  |                                                                                                                |  |  |
|                                                           |                                                                                                                                                                                |                                                                                                                                                                                                                                                                                                                                                   |                                                                                     |                            |         |  |                                |  |                                                                                                                |  |  |
| <b>Time frame: past 36 months</b>                         |                                                                                                                                                                                |                                                                                                                                                                                                                                                                                                                                                   |                                                                                     |                            |         |  |                                |  |                                                                                                                |  |  |
| <b>2</b>                                                  | Grants or contracts from any entity (if not indicated in item #1 above).                                                                                                       | <input type="checkbox"/> <b>None</b><br><table border="1" style="width: 100%; margin-top: 5px;"> <tr><td style="width: 60%;">Assembly Biosciences</td><td>Research and grant support</td></tr> <tr><td>Celgene</td><td></td></tr> <tr><td>University of Florida (TARGET)</td><td></td></tr> <tr><td>Vir Biotechnology</td><td></td></tr> </table> | Assembly Biosciences                                                                | Research and grant support | Celgene |  | University of Florida (TARGET) |  | Vir Biotechnology                                                                                              |  |  |
| Assembly Biosciences                                      | Research and grant support                                                                                                                                                     |                                                                                                                                                                                                                                                                                                                                                   |                                                                                     |                            |         |  |                                |  |                                                                                                                |  |  |
| Celgene                                                   |                                                                                                                                                                                |                                                                                                                                                                                                                                                                                                                                                   |                                                                                     |                            |         |  |                                |  |                                                                                                                |  |  |
| University of Florida (TARGET)                            |                                                                                                                                                                                |                                                                                                                                                                                                                                                                                                                                                   |                                                                                     |                            |         |  |                                |  |                                                                                                                |  |  |
| Vir Biotechnology                                         |                                                                                                                                                                                |                                                                                                                                                                                                                                                                                                                                                   |                                                                                     |                            |         |  |                                |  |                                                                                                                |  |  |

|    |                                                                                                              | Name all entities with whom you have this relationship or indicate none (add rows as needed) | Specifications/Comments (e.g., if payments were made to you or to your institution) |
|----|--------------------------------------------------------------------------------------------------------------|----------------------------------------------------------------------------------------------|-------------------------------------------------------------------------------------|
| 3  | Royalties or licenses                                                                                        | <input type="checkbox"/> None                                                                |                                                                                     |
|    |                                                                                                              | Schiff Diseases of the Liver , 12 <sup>th</sup> edition                                      | Royalties                                                                           |
|    |                                                                                                              |                                                                                              |                                                                                     |
|    |                                                                                                              |                                                                                              |                                                                                     |
| 4  | Consulting fees                                                                                              | <input checked="" type="checkbox"/> None                                                     |                                                                                     |
|    |                                                                                                              |                                                                                              |                                                                                     |
|    |                                                                                                              |                                                                                              |                                                                                     |
|    |                                                                                                              |                                                                                              |                                                                                     |
| 5  | Payment or honoraria for lectures, presentations, speakers bureaus, manuscript writing or educational events | <input checked="" type="checkbox"/> None                                                     |                                                                                     |
|    |                                                                                                              |                                                                                              |                                                                                     |
|    |                                                                                                              |                                                                                              |                                                                                     |
|    |                                                                                                              |                                                                                              |                                                                                     |
| 6  | Payment for expert testimony                                                                                 | <input checked="" type="checkbox"/> None                                                     |                                                                                     |
|    |                                                                                                              |                                                                                              |                                                                                     |
|    |                                                                                                              |                                                                                              |                                                                                     |
|    |                                                                                                              |                                                                                              |                                                                                     |
| 7  | Support for attending meetings and/or travel                                                                 | <input checked="" type="checkbox"/> None                                                     |                                                                                     |
|    |                                                                                                              |                                                                                              |                                                                                     |
|    |                                                                                                              |                                                                                              |                                                                                     |
|    |                                                                                                              |                                                                                              |                                                                                     |
| 8  | Patents planned, issued or pending                                                                           | <input checked="" type="checkbox"/> None                                                     |                                                                                     |
|    |                                                                                                              |                                                                                              |                                                                                     |
|    |                                                                                                              |                                                                                              |                                                                                     |
|    |                                                                                                              |                                                                                              |                                                                                     |
| 9  | Participation on a Data Safety Monitoring Board or Advisory Board                                            | <input checked="" type="checkbox"/> None                                                     |                                                                                     |
|    |                                                                                                              |                                                                                              |                                                                                     |
|    |                                                                                                              |                                                                                              |                                                                                     |
|    |                                                                                                              |                                                                                              |                                                                                     |
| 10 | Leadership or fiduciary role in other board,                                                                 | <input checked="" type="checkbox"/> None                                                     |                                                                                     |
|    |                                                                                                              |                                                                                              |                                                                                     |

|           |                                                                                  | Name all entities with whom you have this relationship or indicate none (add rows as needed) | Specifications/Comments (e.g., if payments were made to you or to your institution) |
|-----------|----------------------------------------------------------------------------------|----------------------------------------------------------------------------------------------|-------------------------------------------------------------------------------------|
|           | society, committee or advocacy group, paid or unpaid                             |                                                                                              |                                                                                     |
| <b>11</b> | Stock or stock options                                                           | <input checked="" type="checkbox"/> <b>None</b>                                              |                                                                                     |
|           |                                                                                  |                                                                                              |                                                                                     |
|           |                                                                                  |                                                                                              |                                                                                     |
| <b>12</b> | Receipt of equipment, materials, drugs, medical writing, gifts or other services | <input checked="" type="checkbox"/> <b>None</b>                                              |                                                                                     |
|           |                                                                                  |                                                                                              |                                                                                     |
|           |                                                                                  |                                                                                              |                                                                                     |
| <b>13</b> | Other financial or non-financial interests                                       | <input checked="" type="checkbox"/> <b>None</b>                                              |                                                                                     |
|           |                                                                                  |                                                                                              |                                                                                     |
|           |                                                                                  |                                                                                              |                                                                                     |

Please place an "X" next to the following statement to indicate your agreement:

I certify that I have answered every question and have not altered the wording of any of the questions on this form.

## ICMJE DISCLOSURE FORM

**Date:** 8/7/2023

**Your Name:** Ho S Bae

**Manuscript Title:** Safety and off-treatment response of patients with chronic hepatitis B virus infection receiving long-term open-label vebicorvir

**Manuscript Number (if known):** [Click or tap here to enter text.](#)

In the interest of transparency, we ask you to disclose all relationships/activities/interests listed below that are related to the content of your manuscript. "Related" means any relation with for-profit or not-for-profit third parties whose interests may be affected by the content of the manuscript. Disclosure represents a commitment to transparency and does not necessarily indicate a bias. If you are in doubt about whether to list a relationship/activity/interest, it is preferable that you do so.

In the interest of transparency, we ask you to disclose all relationships/activities/interests listed below that are related to the content of your manuscript. "Related" means any relation with for-profit or not-for-profit third parties whose interests may be affected by the content of the manuscript. Disclosure represents a commitment to transparency and does not necessarily indicate a bias. If you are in doubt about whether to list a relationship/activity/interest, it is preferable that you do so.

The author's relationships/activities/interests should be defined broadly. For example, if your manuscript pertains to the epidemiology of hypertension, you should declare all relationships with manufacturers of antihypertensive medication, even if that medication is not mentioned in the manuscript.

In item #1 below, report all support for the work reported in this manuscript without time limit. For all other items, the time frame for disclosure is the past 36 months.

|                                                    | Name all entities with whom you have this relationship or indicate none (add rows as needed)                                                                                   | Specifications/Comments (e.g., if payments were made to you or to your institution)                                                                                                                                                                                                                                                                                                                                |                      |                  |                 |                  |  |                                           |
|----------------------------------------------------|--------------------------------------------------------------------------------------------------------------------------------------------------------------------------------|--------------------------------------------------------------------------------------------------------------------------------------------------------------------------------------------------------------------------------------------------------------------------------------------------------------------------------------------------------------------------------------------------------------------|----------------------|------------------|-----------------|------------------|--|-------------------------------------------|
| Time frame: Since the initial planning of the work |                                                                                                                                                                                |                                                                                                                                                                                                                                                                                                                                                                                                                    |                      |                  |                 |                  |  |                                           |
| <b>1</b>                                           | All support for the present manuscript (e.g., funding, provision of study materials, medical writing, article processing charges, etc.)<br><b>No time limit for this item.</b> | <input checked="" type="checkbox"/> <b>None</b><br><table border="1" style="width: 100%; border-collapse: collapse; margin-top: 5px;"> <tr><td style="height: 20px;"> </td><td style="width: 20%;"></td></tr> <tr><td style="height: 20px;"> </td><td></td></tr> <tr><td style="height: 20px;"> </td><td style="text-align: right; font-size: small;">Click the tab key to add additional rows.</td></tr> </table> |                      |                  |                 |                  |  | Click the tab key to add additional rows. |
|                                                    |                                                                                                                                                                                |                                                                                                                                                                                                                                                                                                                                                                                                                    |                      |                  |                 |                  |  |                                           |
|                                                    |                                                                                                                                                                                |                                                                                                                                                                                                                                                                                                                                                                                                                    |                      |                  |                 |                  |  |                                           |
|                                                    | Click the tab key to add additional rows.                                                                                                                                      |                                                                                                                                                                                                                                                                                                                                                                                                                    |                      |                  |                 |                  |  |                                           |
| Time frame: past 36 months                         |                                                                                                                                                                                |                                                                                                                                                                                                                                                                                                                                                                                                                    |                      |                  |                 |                  |  |                                           |
| <b>2</b>                                           | Grants or contracts from any entity (if not indicated in item #1 above).                                                                                                       | <input type="checkbox"/> <b>None</b><br><table border="1" style="width: 100%; border-collapse: collapse; margin-top: 5px;"> <tr> <td style="width: 60%;">Bristol-Myers Squibb</td> <td>Research support</td> </tr> <tr> <td>Gilead Sciences</td> <td>Research support</td> </tr> <tr> <td style="height: 20px;"> </td> <td></td> </tr> </table>                                                                    | Bristol-Myers Squibb | Research support | Gilead Sciences | Research support |  |                                           |
| Bristol-Myers Squibb                               | Research support                                                                                                                                                               |                                                                                                                                                                                                                                                                                                                                                                                                                    |                      |                  |                 |                  |  |                                           |
| Gilead Sciences                                    | Research support                                                                                                                                                               |                                                                                                                                                                                                                                                                                                                                                                                                                    |                      |                  |                 |                  |  |                                           |
|                                                    |                                                                                                                                                                                |                                                                                                                                                                                                                                                                                                                                                                                                                    |                      |                  |                 |                  |  |                                           |

|                      |                                                                                                              | Name all entities with whom you have this relationship or indicate none (add rows as needed)                                                                                                                                                                                                                                                                                   | Specifications/Comments (e.g., if payments were made to you or to your institution) |            |                 |            |  |  |  |  |  |
|----------------------|--------------------------------------------------------------------------------------------------------------|--------------------------------------------------------------------------------------------------------------------------------------------------------------------------------------------------------------------------------------------------------------------------------------------------------------------------------------------------------------------------------|-------------------------------------------------------------------------------------|------------|-----------------|------------|--|--|--|--|--|
| 3                    | Royalties or licenses                                                                                        | <input checked="" type="checkbox"/> <b>None</b><br><table border="1" style="width: 100%; border-collapse: collapse;"> <tr><td style="width: 50%; height: 20px;"></td><td style="width: 50%;"></td></tr> <tr><td style="height: 20px;"></td><td></td></tr> <tr><td style="height: 20px;"></td><td></td></tr> </table>                                                           |                                                                                     |            |                 |            |  |  |  |  |  |
|                      |                                                                                                              |                                                                                                                                                                                                                                                                                                                                                                                |                                                                                     |            |                 |            |  |  |  |  |  |
|                      |                                                                                                              |                                                                                                                                                                                                                                                                                                                                                                                |                                                                                     |            |                 |            |  |  |  |  |  |
|                      |                                                                                                              |                                                                                                                                                                                                                                                                                                                                                                                |                                                                                     |            |                 |            |  |  |  |  |  |
| 4                    | Consulting fees                                                                                              | <input type="checkbox"/> <b>None</b><br><table border="1" style="width: 100%; border-collapse: collapse;"> <tr><td style="width: 50%;">Bristol-Myers Squibb</td><td style="width: 50%;">Consultant</td></tr> <tr><td>Gilead Sciences</td><td>Consultant</td></tr> <tr><td style="height: 20px;"></td><td></td></tr> <tr><td style="height: 20px;"></td><td></td></tr> </table> | Bristol-Myers Squibb                                                                | Consultant | Gilead Sciences | Consultant |  |  |  |  |  |
| Bristol-Myers Squibb | Consultant                                                                                                   |                                                                                                                                                                                                                                                                                                                                                                                |                                                                                     |            |                 |            |  |  |  |  |  |
| Gilead Sciences      | Consultant                                                                                                   |                                                                                                                                                                                                                                                                                                                                                                                |                                                                                     |            |                 |            |  |  |  |  |  |
|                      |                                                                                                              |                                                                                                                                                                                                                                                                                                                                                                                |                                                                                     |            |                 |            |  |  |  |  |  |
|                      |                                                                                                              |                                                                                                                                                                                                                                                                                                                                                                                |                                                                                     |            |                 |            |  |  |  |  |  |
| 5                    | Payment or honoraria for lectures, presentations, speakers bureaus, manuscript writing or educational events | <input checked="" type="checkbox"/> <b>None</b><br><table border="1" style="width: 100%; border-collapse: collapse;"> <tr><td style="width: 50%; height: 20px;"></td><td style="width: 50%;"></td></tr> <tr><td style="height: 20px;"></td><td></td></tr> <tr><td style="height: 20px;"></td><td></td></tr> </table>                                                           |                                                                                     |            |                 |            |  |  |  |  |  |
|                      |                                                                                                              |                                                                                                                                                                                                                                                                                                                                                                                |                                                                                     |            |                 |            |  |  |  |  |  |
|                      |                                                                                                              |                                                                                                                                                                                                                                                                                                                                                                                |                                                                                     |            |                 |            |  |  |  |  |  |
|                      |                                                                                                              |                                                                                                                                                                                                                                                                                                                                                                                |                                                                                     |            |                 |            |  |  |  |  |  |
| 6                    | Payment for expert testimony                                                                                 | <input checked="" type="checkbox"/> <b>None</b><br><table border="1" style="width: 100%; border-collapse: collapse;"> <tr><td style="width: 50%; height: 20px;"></td><td style="width: 50%;"></td></tr> <tr><td style="height: 20px;"></td><td></td></tr> <tr><td style="height: 20px;"></td><td></td></tr> </table>                                                           |                                                                                     |            |                 |            |  |  |  |  |  |
|                      |                                                                                                              |                                                                                                                                                                                                                                                                                                                                                                                |                                                                                     |            |                 |            |  |  |  |  |  |
|                      |                                                                                                              |                                                                                                                                                                                                                                                                                                                                                                                |                                                                                     |            |                 |            |  |  |  |  |  |
|                      |                                                                                                              |                                                                                                                                                                                                                                                                                                                                                                                |                                                                                     |            |                 |            |  |  |  |  |  |
| 7                    | Support for attending meetings and/or travel                                                                 | <input checked="" type="checkbox"/> <b>None</b><br><table border="1" style="width: 100%; border-collapse: collapse;"> <tr><td style="width: 50%; height: 20px;"></td><td style="width: 50%;"></td></tr> <tr><td style="height: 20px;"></td><td></td></tr> <tr><td style="height: 20px;"></td><td></td></tr> </table>                                                           |                                                                                     |            |                 |            |  |  |  |  |  |
|                      |                                                                                                              |                                                                                                                                                                                                                                                                                                                                                                                |                                                                                     |            |                 |            |  |  |  |  |  |
|                      |                                                                                                              |                                                                                                                                                                                                                                                                                                                                                                                |                                                                                     |            |                 |            |  |  |  |  |  |
|                      |                                                                                                              |                                                                                                                                                                                                                                                                                                                                                                                |                                                                                     |            |                 |            |  |  |  |  |  |
| 8                    | Patents planned, issued or pending                                                                           | <input checked="" type="checkbox"/> <b>None</b><br><table border="1" style="width: 100%; border-collapse: collapse;"> <tr><td style="width: 50%; height: 20px;"></td><td style="width: 50%;"></td></tr> <tr><td style="height: 20px;"></td><td></td></tr> <tr><td style="height: 20px;"></td><td></td></tr> </table>                                                           |                                                                                     |            |                 |            |  |  |  |  |  |
|                      |                                                                                                              |                                                                                                                                                                                                                                                                                                                                                                                |                                                                                     |            |                 |            |  |  |  |  |  |
|                      |                                                                                                              |                                                                                                                                                                                                                                                                                                                                                                                |                                                                                     |            |                 |            |  |  |  |  |  |
|                      |                                                                                                              |                                                                                                                                                                                                                                                                                                                                                                                |                                                                                     |            |                 |            |  |  |  |  |  |
| 9                    | Participation on a Data Safety Monitoring Board or Advisory Board                                            | <input checked="" type="checkbox"/> <b>None</b><br><table border="1" style="width: 100%; border-collapse: collapse;"> <tr><td style="width: 50%; height: 20px;"></td><td style="width: 50%;"></td></tr> <tr><td style="height: 20px;"></td><td></td></tr> <tr><td style="height: 20px;"></td><td></td></tr> <tr><td style="height: 20px;"></td><td></td></tr> </table>         |                                                                                     |            |                 |            |  |  |  |  |  |
|                      |                                                                                                              |                                                                                                                                                                                                                                                                                                                                                                                |                                                                                     |            |                 |            |  |  |  |  |  |
|                      |                                                                                                              |                                                                                                                                                                                                                                                                                                                                                                                |                                                                                     |            |                 |            |  |  |  |  |  |
|                      |                                                                                                              |                                                                                                                                                                                                                                                                                                                                                                                |                                                                                     |            |                 |            |  |  |  |  |  |
|                      |                                                                                                              |                                                                                                                                                                                                                                                                                                                                                                                |                                                                                     |            |                 |            |  |  |  |  |  |
| 10                   | Leadership or fiduciary role in                                                                              | <input checked="" type="checkbox"/> <b>None</b>                                                                                                                                                                                                                                                                                                                                |                                                                                     |            |                 |            |  |  |  |  |  |

|           |                                                                                  | Name all entities with whom you have this relationship or indicate none (add rows as needed)                                                                             | Specifications/Comments (e.g., if payments were made to you or to your institution) |  |  |  |  |  |  |
|-----------|----------------------------------------------------------------------------------|--------------------------------------------------------------------------------------------------------------------------------------------------------------------------|-------------------------------------------------------------------------------------|--|--|--|--|--|--|
|           | other board, society, committee or advocacy group, paid or unpaid                | <table border="1"> <tr><td> </td><td> </td></tr> <tr><td> </td><td> </td></tr> <tr><td> </td><td> </td></tr> </table>                                                    |                                                                                     |  |  |  |  |  |  |
|           |                                                                                  |                                                                                                                                                                          |                                                                                     |  |  |  |  |  |  |
|           |                                                                                  |                                                                                                                                                                          |                                                                                     |  |  |  |  |  |  |
|           |                                                                                  |                                                                                                                                                                          |                                                                                     |  |  |  |  |  |  |
| <b>11</b> | Stock or stock options                                                           | <input checked="" type="checkbox"/> <b>None</b><br><table border="1"> <tr><td> </td><td> </td></tr> <tr><td> </td><td> </td></tr> <tr><td> </td><td> </td></tr> </table> |                                                                                     |  |  |  |  |  |  |
|           |                                                                                  |                                                                                                                                                                          |                                                                                     |  |  |  |  |  |  |
|           |                                                                                  |                                                                                                                                                                          |                                                                                     |  |  |  |  |  |  |
|           |                                                                                  |                                                                                                                                                                          |                                                                                     |  |  |  |  |  |  |
| <b>12</b> | Receipt of equipment, materials, drugs, medical writing, gifts or other services | <input checked="" type="checkbox"/> <b>None</b><br><table border="1"> <tr><td> </td><td> </td></tr> <tr><td> </td><td> </td></tr> <tr><td> </td><td> </td></tr> </table> |                                                                                     |  |  |  |  |  |  |
|           |                                                                                  |                                                                                                                                                                          |                                                                                     |  |  |  |  |  |  |
|           |                                                                                  |                                                                                                                                                                          |                                                                                     |  |  |  |  |  |  |
|           |                                                                                  |                                                                                                                                                                          |                                                                                     |  |  |  |  |  |  |
| <b>13</b> | Other financial or non-financial interests                                       | <input checked="" type="checkbox"/> <b>None</b><br><table border="1"> <tr><td> </td><td> </td></tr> <tr><td> </td><td> </td></tr> <tr><td> </td><td> </td></tr> </table> |                                                                                     |  |  |  |  |  |  |
|           |                                                                                  |                                                                                                                                                                          |                                                                                     |  |  |  |  |  |  |
|           |                                                                                  |                                                                                                                                                                          |                                                                                     |  |  |  |  |  |  |
|           |                                                                                  |                                                                                                                                                                          |                                                                                     |  |  |  |  |  |  |

**Please place an "X" next to the following statement to indicate your agreement:**

I certify that I have answered every question and have not altered the wording of any of the questions on this form.

## ICMJE DISCLOSURE FORM

**Date:** 8/7/2023

**Your Name:** Jacob Lalezari

**Manuscript Title:** Safety and off-treatment response of patients with chronic hepatitis B virus infection receiving long-term open-label vebicorvir

**Manuscript Number (if known):** [Click or tap here to enter text.](#)

In the interest of transparency, we ask you to disclose all relationships/activities/interests listed below that are related to the content of your manuscript. "Related" means any relation with for-profit or not-for-profit third parties whose interests may be affected by the content of the manuscript. Disclosure represents a commitment to transparency and does not necessarily indicate a bias. If you are in doubt about whether to list a relationship/activity/interest, it is preferable that you do so.

In the interest of transparency, we ask you to disclose all relationships/activities/interests listed below that are related to the content of your manuscript. "Related" means any relation with for-profit or not-for-profit third parties whose interests may be affected by the content of the manuscript. Disclosure represents a commitment to transparency and does not necessarily indicate a bias. If you are in doubt about whether to list a relationship/activity/interest, it is preferable that you do so.

The author's relationships/activities/interests should be defined broadly. For example, if your manuscript pertains to the epidemiology of hypertension, you should declare all relationships with manufacturers of antihypertensive medication, even if that medication is not mentioned in the manuscript.

In item #1 below, report all support for the work reported in this manuscript without time limit. For all other items, the time frame for disclosure is the past 36 months.

|                                                    | Name all entities with whom you have this relationship or indicate none (add rows as needed)                                                                                   | Specifications/Comments (e.g., if payments were made to you or to your institution)                                                                                                                                                                                                                                                                                                                                                                     |  |  |  |  |  |  |
|----------------------------------------------------|--------------------------------------------------------------------------------------------------------------------------------------------------------------------------------|---------------------------------------------------------------------------------------------------------------------------------------------------------------------------------------------------------------------------------------------------------------------------------------------------------------------------------------------------------------------------------------------------------------------------------------------------------|--|--|--|--|--|--|
| Time frame: Since the initial planning of the work |                                                                                                                                                                                |                                                                                                                                                                                                                                                                                                                                                                                                                                                         |  |  |  |  |  |  |
| <b>1</b>                                           | All support for the present manuscript (e.g., funding, provision of study materials, medical writing, article processing charges, etc.)<br><b>No time limit for this item.</b> | <input checked="" type="checkbox"/> <b>None</b><br><table border="1" style="width: 100%; height: 40px; margin-top: 5px;"> <tr><td style="width: 60%;"></td><td style="width: 40%;"></td></tr> <tr><td style="width: 60%;"></td><td style="width: 40%;"></td></tr> <tr><td style="width: 60%;"></td><td style="width: 40%;"></td></tr> </table> <p style="font-size: small; color: gray; margin-top: 5px;">Click the tab key to add additional rows.</p> |  |  |  |  |  |  |
|                                                    |                                                                                                                                                                                |                                                                                                                                                                                                                                                                                                                                                                                                                                                         |  |  |  |  |  |  |
|                                                    |                                                                                                                                                                                |                                                                                                                                                                                                                                                                                                                                                                                                                                                         |  |  |  |  |  |  |
|                                                    |                                                                                                                                                                                |                                                                                                                                                                                                                                                                                                                                                                                                                                                         |  |  |  |  |  |  |
| Time frame: past 36 months                         |                                                                                                                                                                                |                                                                                                                                                                                                                                                                                                                                                                                                                                                         |  |  |  |  |  |  |
| <b>2</b>                                           | Grants or contracts from any entity (if not indicated in item #1 above).                                                                                                       | <input checked="" type="checkbox"/> <b>None</b><br><table border="1" style="width: 100%; height: 40px; margin-top: 5px;"> <tr><td style="width: 60%;"></td><td style="width: 40%;"></td></tr> <tr><td style="width: 60%;"></td><td style="width: 40%;"></td></tr> <tr><td style="width: 60%;"></td><td style="width: 40%;"></td></tr> </table>                                                                                                          |  |  |  |  |  |  |
|                                                    |                                                                                                                                                                                |                                                                                                                                                                                                                                                                                                                                                                                                                                                         |  |  |  |  |  |  |
|                                                    |                                                                                                                                                                                |                                                                                                                                                                                                                                                                                                                                                                                                                                                         |  |  |  |  |  |  |
|                                                    |                                                                                                                                                                                |                                                                                                                                                                                                                                                                                                                                                                                                                                                         |  |  |  |  |  |  |

|           |                                                                                                              | Name all entities with whom you have this relationship or indicate none (add rows as needed)                                                                                                                                                                                                                                                                           | Specifications/Comments (e.g., if payments were made to you or to your institution) |  |  |  |  |  |  |  |  |
|-----------|--------------------------------------------------------------------------------------------------------------|------------------------------------------------------------------------------------------------------------------------------------------------------------------------------------------------------------------------------------------------------------------------------------------------------------------------------------------------------------------------|-------------------------------------------------------------------------------------|--|--|--|--|--|--|--|--|
| <b>3</b>  | Royalties or licenses                                                                                        | <input checked="" type="checkbox"/> <b>None</b><br><table border="1" style="width: 100%; border-collapse: collapse;"> <tr><td style="width: 50%; height: 20px;"></td><td style="width: 50%;"></td></tr> <tr><td style="height: 20px;"></td><td></td></tr> <tr><td style="height: 20px;"></td><td></td></tr> </table>                                                   |                                                                                     |  |  |  |  |  |  |  |  |
|           |                                                                                                              |                                                                                                                                                                                                                                                                                                                                                                        |                                                                                     |  |  |  |  |  |  |  |  |
|           |                                                                                                              |                                                                                                                                                                                                                                                                                                                                                                        |                                                                                     |  |  |  |  |  |  |  |  |
|           |                                                                                                              |                                                                                                                                                                                                                                                                                                                                                                        |                                                                                     |  |  |  |  |  |  |  |  |
| <b>4</b>  | Consulting fees                                                                                              | <input checked="" type="checkbox"/> <b>None</b><br><table border="1" style="width: 100%; border-collapse: collapse;"> <tr><td style="width: 50%; height: 20px;"></td><td style="width: 50%;"></td></tr> <tr><td style="height: 20px;"></td><td></td></tr> <tr><td style="height: 20px;"></td><td></td></tr> <tr><td style="height: 20px;"></td><td></td></tr> </table> |                                                                                     |  |  |  |  |  |  |  |  |
|           |                                                                                                              |                                                                                                                                                                                                                                                                                                                                                                        |                                                                                     |  |  |  |  |  |  |  |  |
|           |                                                                                                              |                                                                                                                                                                                                                                                                                                                                                                        |                                                                                     |  |  |  |  |  |  |  |  |
|           |                                                                                                              |                                                                                                                                                                                                                                                                                                                                                                        |                                                                                     |  |  |  |  |  |  |  |  |
|           |                                                                                                              |                                                                                                                                                                                                                                                                                                                                                                        |                                                                                     |  |  |  |  |  |  |  |  |
| <b>5</b>  | Payment or honoraria for lectures, presentations, speakers bureaus, manuscript writing or educational events | <input checked="" type="checkbox"/> <b>None</b><br><table border="1" style="width: 100%; border-collapse: collapse;"> <tr><td style="width: 50%; height: 20px;"></td><td style="width: 50%;"></td></tr> <tr><td style="height: 20px;"></td><td></td></tr> <tr><td style="height: 20px;"></td><td></td></tr> </table>                                                   |                                                                                     |  |  |  |  |  |  |  |  |
|           |                                                                                                              |                                                                                                                                                                                                                                                                                                                                                                        |                                                                                     |  |  |  |  |  |  |  |  |
|           |                                                                                                              |                                                                                                                                                                                                                                                                                                                                                                        |                                                                                     |  |  |  |  |  |  |  |  |
|           |                                                                                                              |                                                                                                                                                                                                                                                                                                                                                                        |                                                                                     |  |  |  |  |  |  |  |  |
| <b>6</b>  | Payment for expert testimony                                                                                 | <input checked="" type="checkbox"/> <b>None</b><br><table border="1" style="width: 100%; border-collapse: collapse;"> <tr><td style="width: 50%; height: 20px;"></td><td style="width: 50%;"></td></tr> <tr><td style="height: 20px;"></td><td></td></tr> <tr><td style="height: 20px;"></td><td></td></tr> </table>                                                   |                                                                                     |  |  |  |  |  |  |  |  |
|           |                                                                                                              |                                                                                                                                                                                                                                                                                                                                                                        |                                                                                     |  |  |  |  |  |  |  |  |
|           |                                                                                                              |                                                                                                                                                                                                                                                                                                                                                                        |                                                                                     |  |  |  |  |  |  |  |  |
|           |                                                                                                              |                                                                                                                                                                                                                                                                                                                                                                        |                                                                                     |  |  |  |  |  |  |  |  |
| <b>7</b>  | Support for attending meetings and/or travel                                                                 | <input checked="" type="checkbox"/> <b>None</b><br><table border="1" style="width: 100%; border-collapse: collapse;"> <tr><td style="width: 50%; height: 20px;"></td><td style="width: 50%;"></td></tr> <tr><td style="height: 20px;"></td><td></td></tr> <tr><td style="height: 20px;"></td><td></td></tr> </table>                                                   |                                                                                     |  |  |  |  |  |  |  |  |
|           |                                                                                                              |                                                                                                                                                                                                                                                                                                                                                                        |                                                                                     |  |  |  |  |  |  |  |  |
|           |                                                                                                              |                                                                                                                                                                                                                                                                                                                                                                        |                                                                                     |  |  |  |  |  |  |  |  |
|           |                                                                                                              |                                                                                                                                                                                                                                                                                                                                                                        |                                                                                     |  |  |  |  |  |  |  |  |
| <b>8</b>  | Patents planned, issued or pending                                                                           | <input checked="" type="checkbox"/> <b>None</b><br><table border="1" style="width: 100%; border-collapse: collapse;"> <tr><td style="width: 50%; height: 20px;"></td><td style="width: 50%;"></td></tr> <tr><td style="height: 20px;"></td><td></td></tr> <tr><td style="height: 20px;"></td><td></td></tr> </table>                                                   |                                                                                     |  |  |  |  |  |  |  |  |
|           |                                                                                                              |                                                                                                                                                                                                                                                                                                                                                                        |                                                                                     |  |  |  |  |  |  |  |  |
|           |                                                                                                              |                                                                                                                                                                                                                                                                                                                                                                        |                                                                                     |  |  |  |  |  |  |  |  |
|           |                                                                                                              |                                                                                                                                                                                                                                                                                                                                                                        |                                                                                     |  |  |  |  |  |  |  |  |
| <b>9</b>  | Participation on a Data Safety Monitoring Board or Advisory Board                                            | <input checked="" type="checkbox"/> <b>None</b><br><table border="1" style="width: 100%; border-collapse: collapse;"> <tr><td style="width: 50%; height: 20px;"></td><td style="width: 50%;"></td></tr> <tr><td style="height: 20px;"></td><td></td></tr> <tr><td style="height: 20px;"></td><td></td></tr> </table>                                                   |                                                                                     |  |  |  |  |  |  |  |  |
|           |                                                                                                              |                                                                                                                                                                                                                                                                                                                                                                        |                                                                                     |  |  |  |  |  |  |  |  |
|           |                                                                                                              |                                                                                                                                                                                                                                                                                                                                                                        |                                                                                     |  |  |  |  |  |  |  |  |
|           |                                                                                                              |                                                                                                                                                                                                                                                                                                                                                                        |                                                                                     |  |  |  |  |  |  |  |  |
| <b>10</b> | Leadership or fiduciary role in other board,                                                                 | <input checked="" type="checkbox"/> <b>None</b><br><table border="1" style="width: 100%; border-collapse: collapse;"> <tr><td style="width: 50%; height: 20px;"></td><td style="width: 50%;"></td></tr> </table>                                                                                                                                                       |                                                                                     |  |  |  |  |  |  |  |  |
|           |                                                                                                              |                                                                                                                                                                                                                                                                                                                                                                        |                                                                                     |  |  |  |  |  |  |  |  |



|           |                                                                                  | Name all entities with whom you have this relationship or indicate none (add rows as needed) | Specifications/Comments (e.g., if payments were made to you or to your institution) |
|-----------|----------------------------------------------------------------------------------|----------------------------------------------------------------------------------------------|-------------------------------------------------------------------------------------|
|           | society, committee or advocacy group, paid or unpaid                             |                                                                                              |                                                                                     |
| <b>11</b> | Stock or stock options                                                           | <input checked="" type="checkbox"/> <b>None</b>                                              |                                                                                     |
|           |                                                                                  |                                                                                              |                                                                                     |
|           |                                                                                  |                                                                                              |                                                                                     |
| <b>12</b> | Receipt of equipment, materials, drugs, medical writing, gifts or other services | <input checked="" type="checkbox"/> <b>None</b>                                              |                                                                                     |
|           |                                                                                  |                                                                                              |                                                                                     |
|           |                                                                                  |                                                                                              |                                                                                     |
| <b>13</b> | Other financial or non-financial interests                                       | <input checked="" type="checkbox"/> <b>None</b>                                              |                                                                                     |
|           |                                                                                  |                                                                                              |                                                                                     |
|           |                                                                                  |                                                                                              |                                                                                     |

Please place an "X" next to the following statement to indicate your agreement:

I certify that I have answered every question and have not altered the wording of any of the questions on this form.

## ICMJE DISCLOSURE FORM

**Date:** 8/7/2023

**Your Name:** Kosh Agarwal

**Manuscript Title:** Safety and off-treatment response of patients with chronic hepatitis B virus infection receiving long-term open-label vebicorvir

**Manuscript Number (if known):** [Click or tap here to enter text.](#)

In the interest of transparency, we ask you to disclose all relationships/activities/interests listed below that are related to the content of your manuscript. "Related" means any relation with for-profit or not-for-profit third parties whose interests may be affected by the content of the manuscript. Disclosure represents a commitment to transparency and does not necessarily indicate a bias. If you are in doubt about whether to list a relationship/activity/interest, it is preferable that you do so.

In the interest of transparency, we ask you to disclose all relationships/activities/interests listed below that are related to the content of your manuscript. "Related" means any relation with for-profit or not-for-profit third parties whose interests may be affected by the content of the manuscript. Disclosure represents a commitment to transparency and does not necessarily indicate a bias. If you are in doubt about whether to list a relationship/activity/interest, it is preferable that you do so.

The author's relationships/activities/interests should be defined broadly. For example, if your manuscript pertains to the epidemiology of hypertension, you should declare all relationships with manufacturers of antihypertensive medication, even if that medication is not mentioned in the manuscript.

In item #1 below, report all support for the work reported in this manuscript without time limit. For all other items, the time frame for disclosure is the past 36 months.

|                                                    | Name all entities with whom you have this relationship or indicate none (add rows as needed)                                                                                   | Specifications/Comments (e.g., if payments were made to you or to your institution)                                                                                                                                                                                                                                                                                                    |                      |                 |                 |       |  |  |  |
|----------------------------------------------------|--------------------------------------------------------------------------------------------------------------------------------------------------------------------------------|----------------------------------------------------------------------------------------------------------------------------------------------------------------------------------------------------------------------------------------------------------------------------------------------------------------------------------------------------------------------------------------|----------------------|-----------------|-----------------|-------|--|--|--|
| Time frame: Since the initial planning of the work |                                                                                                                                                                                |                                                                                                                                                                                                                                                                                                                                                                                        |                      |                 |                 |       |  |  |  |
| <b>1</b>                                           | All support for the present manuscript (e.g., funding, provision of study materials, medical writing, article processing charges, etc.)<br><b>No time limit for this item.</b> | <input checked="" type="checkbox"/> <b>None</b><br><table border="1" style="width: 100%; height: 40px; margin-top: 5px;"> <tr><td style="width: 60%;"></td><td style="width: 40%;"></td></tr> <tr><td></td><td></td></tr> <tr><td></td><td></td></tr> </table> <p style="font-size: small; color: gray; text-align: right;">Click the tab key to add additional rows.</p>              |                      |                 |                 |       |  |  |  |
|                                                    |                                                                                                                                                                                |                                                                                                                                                                                                                                                                                                                                                                                        |                      |                 |                 |       |  |  |  |
|                                                    |                                                                                                                                                                                |                                                                                                                                                                                                                                                                                                                                                                                        |                      |                 |                 |       |  |  |  |
|                                                    |                                                                                                                                                                                |                                                                                                                                                                                                                                                                                                                                                                                        |                      |                 |                 |       |  |  |  |
| Time frame: past 36 months                         |                                                                                                                                                                                |                                                                                                                                                                                                                                                                                                                                                                                        |                      |                 |                 |       |  |  |  |
| <b>2</b>                                           | Grants or contracts from any entity (if not indicated in item #1 above).                                                                                                       | <input type="checkbox"/> <b>None</b><br><table border="1" style="width: 100%; height: 100px; margin-top: 5px;"> <tr><td style="width: 60%;">Bristol-Myers Squibb</td><td rowspan="6" style="width: 40%; vertical-align: top;">Received grants</td></tr> <tr><td>Gilead Sciences</td></tr> <tr><td>Roche</td></tr> <tr><td> </td></tr> <tr><td> </td></tr> <tr><td> </td></tr> </table> | Bristol-Myers Squibb | Received grants | Gilead Sciences | Roche |  |  |  |
| Bristol-Myers Squibb                               | Received grants                                                                                                                                                                |                                                                                                                                                                                                                                                                                                                                                                                        |                      |                 |                 |       |  |  |  |
| Gilead Sciences                                    |                                                                                                                                                                                |                                                                                                                                                                                                                                                                                                                                                                                        |                      |                 |                 |       |  |  |  |
| Roche                                              |                                                                                                                                                                                |                                                                                                                                                                                                                                                                                                                                                                                        |                      |                 |                 |       |  |  |  |
|                                                    |                                                                                                                                                                                |                                                                                                                                                                                                                                                                                                                                                                                        |                      |                 |                 |       |  |  |  |
|                                                    |                                                                                                                                                                                |                                                                                                                                                                                                                                                                                                                                                                                        |                      |                 |                 |       |  |  |  |
|                                                    |                                                                                                                                                                                |                                                                                                                                                                                                                                                                                                                                                                                        |                      |                 |                 |       |  |  |  |

|                      |                                                                                                              | Name all entities with whom you have this relationship or indicate none (add rows as needed)                                                                                                                                                                                                                                                                                                                                                                                                                                                                                                                                                                                                                                                                                                                                                                                                                                                                                                                                                                                                                                                                                                                   | Specifications/Comments (e.g., if payments were made to you or to your institution) |        |            |        |         |                      |                      |                 |            |         |       |          |       |         |      |                   |
|----------------------|--------------------------------------------------------------------------------------------------------------|----------------------------------------------------------------------------------------------------------------------------------------------------------------------------------------------------------------------------------------------------------------------------------------------------------------------------------------------------------------------------------------------------------------------------------------------------------------------------------------------------------------------------------------------------------------------------------------------------------------------------------------------------------------------------------------------------------------------------------------------------------------------------------------------------------------------------------------------------------------------------------------------------------------------------------------------------------------------------------------------------------------------------------------------------------------------------------------------------------------------------------------------------------------------------------------------------------------|-------------------------------------------------------------------------------------|--------|------------|--------|---------|----------------------|----------------------|-----------------|------------|---------|-------|----------|-------|---------|------|-------------------|
| 3                    | Royalties or licenses                                                                                        | <input checked="" type="checkbox"/> <b>None</b><br><table border="1" style="width: 100%; border-collapse: collapse;"> <tr><td style="width: 50%; height: 20px;"></td><td style="width: 50%;"></td></tr> <tr><td style="height: 20px;"></td><td></td></tr> <tr><td style="height: 20px;"></td><td></td></tr> </table>                                                                                                                                                                                                                                                                                                                                                                                                                                                                                                                                                                                                                                                                                                                                                                                                                                                                                           |                                                                                     |        |            |        |         |                      |                      |                 |            |         |       |          |       |         |      |                   |
|                      |                                                                                                              |                                                                                                                                                                                                                                                                                                                                                                                                                                                                                                                                                                                                                                                                                                                                                                                                                                                                                                                                                                                                                                                                                                                                                                                                                |                                                                                     |        |            |        |         |                      |                      |                 |            |         |       |          |       |         |      |                   |
|                      |                                                                                                              |                                                                                                                                                                                                                                                                                                                                                                                                                                                                                                                                                                                                                                                                                                                                                                                                                                                                                                                                                                                                                                                                                                                                                                                                                |                                                                                     |        |            |        |         |                      |                      |                 |            |         |       |          |       |         |      |                   |
|                      |                                                                                                              |                                                                                                                                                                                                                                                                                                                                                                                                                                                                                                                                                                                                                                                                                                                                                                                                                                                                                                                                                                                                                                                                                                                                                                                                                |                                                                                     |        |            |        |         |                      |                      |                 |            |         |       |          |       |         |      |                   |
| 4                    | Consulting fees                                                                                              | <input type="checkbox"/> <b>None</b><br><table border="1" style="width: 100%; border-collapse: collapse;"> <tr> <td style="width: 50%; border-bottom: 1px solid black;">AbbVie</td> <td rowspan="13" style="width: 50%; vertical-align: top;">Consultant</td> </tr> <tr><td style="border-bottom: 1px solid black;">Aligos</td></tr> <tr><td style="border-bottom: 1px solid black;">Arbutus</td></tr> <tr><td style="border-bottom: 1px solid black;">Assembly Biosciences</td></tr> <tr><td style="border-bottom: 1px solid black;">Bristol-Myers Squibb</td></tr> <tr><td style="border-bottom: 1px solid black;">Gilead Sciences</td></tr> <tr><td style="border-bottom: 1px solid black;">Immunocore</td></tr> <tr><td style="border-bottom: 1px solid black;">Janssen</td></tr> <tr><td style="border-bottom: 1px solid black;">Merck</td></tr> <tr><td style="border-bottom: 1px solid black;">Novartis</td></tr> <tr><td style="border-bottom: 1px solid black;">Roche</td></tr> <tr><td style="border-bottom: 1px solid black;">Shinogi</td></tr> <tr><td style="border-bottom: 1px solid black;">Sobi</td></tr> <tr><td style="border-bottom: 1px solid black;">Vir Biotechnology</td></tr> </table> |                                                                                     | AbbVie | Consultant | Aligos | Arbutus | Assembly Biosciences | Bristol-Myers Squibb | Gilead Sciences | Immunocore | Janssen | Merck | Novartis | Roche | Shinogi | Sobi | Vir Biotechnology |
| AbbVie               | Consultant                                                                                                   |                                                                                                                                                                                                                                                                                                                                                                                                                                                                                                                                                                                                                                                                                                                                                                                                                                                                                                                                                                                                                                                                                                                                                                                                                |                                                                                     |        |            |        |         |                      |                      |                 |            |         |       |          |       |         |      |                   |
| Aligos               |                                                                                                              |                                                                                                                                                                                                                                                                                                                                                                                                                                                                                                                                                                                                                                                                                                                                                                                                                                                                                                                                                                                                                                                                                                                                                                                                                |                                                                                     |        |            |        |         |                      |                      |                 |            |         |       |          |       |         |      |                   |
| Arbutus              |                                                                                                              |                                                                                                                                                                                                                                                                                                                                                                                                                                                                                                                                                                                                                                                                                                                                                                                                                                                                                                                                                                                                                                                                                                                                                                                                                |                                                                                     |        |            |        |         |                      |                      |                 |            |         |       |          |       |         |      |                   |
| Assembly Biosciences |                                                                                                              |                                                                                                                                                                                                                                                                                                                                                                                                                                                                                                                                                                                                                                                                                                                                                                                                                                                                                                                                                                                                                                                                                                                                                                                                                |                                                                                     |        |            |        |         |                      |                      |                 |            |         |       |          |       |         |      |                   |
| Bristol-Myers Squibb |                                                                                                              |                                                                                                                                                                                                                                                                                                                                                                                                                                                                                                                                                                                                                                                                                                                                                                                                                                                                                                                                                                                                                                                                                                                                                                                                                |                                                                                     |        |            |        |         |                      |                      |                 |            |         |       |          |       |         |      |                   |
| Gilead Sciences      |                                                                                                              |                                                                                                                                                                                                                                                                                                                                                                                                                                                                                                                                                                                                                                                                                                                                                                                                                                                                                                                                                                                                                                                                                                                                                                                                                |                                                                                     |        |            |        |         |                      |                      |                 |            |         |       |          |       |         |      |                   |
| Immunocore           |                                                                                                              |                                                                                                                                                                                                                                                                                                                                                                                                                                                                                                                                                                                                                                                                                                                                                                                                                                                                                                                                                                                                                                                                                                                                                                                                                |                                                                                     |        |            |        |         |                      |                      |                 |            |         |       |          |       |         |      |                   |
| Janssen              |                                                                                                              |                                                                                                                                                                                                                                                                                                                                                                                                                                                                                                                                                                                                                                                                                                                                                                                                                                                                                                                                                                                                                                                                                                                                                                                                                |                                                                                     |        |            |        |         |                      |                      |                 |            |         |       |          |       |         |      |                   |
| Merck                |                                                                                                              |                                                                                                                                                                                                                                                                                                                                                                                                                                                                                                                                                                                                                                                                                                                                                                                                                                                                                                                                                                                                                                                                                                                                                                                                                |                                                                                     |        |            |        |         |                      |                      |                 |            |         |       |          |       |         |      |                   |
| Novartis             |                                                                                                              |                                                                                                                                                                                                                                                                                                                                                                                                                                                                                                                                                                                                                                                                                                                                                                                                                                                                                                                                                                                                                                                                                                                                                                                                                |                                                                                     |        |            |        |         |                      |                      |                 |            |         |       |          |       |         |      |                   |
| Roche                |                                                                                                              |                                                                                                                                                                                                                                                                                                                                                                                                                                                                                                                                                                                                                                                                                                                                                                                                                                                                                                                                                                                                                                                                                                                                                                                                                |                                                                                     |        |            |        |         |                      |                      |                 |            |         |       |          |       |         |      |                   |
| Shinogi              |                                                                                                              |                                                                                                                                                                                                                                                                                                                                                                                                                                                                                                                                                                                                                                                                                                                                                                                                                                                                                                                                                                                                                                                                                                                                                                                                                |                                                                                     |        |            |        |         |                      |                      |                 |            |         |       |          |       |         |      |                   |
| Sobi                 |                                                                                                              |                                                                                                                                                                                                                                                                                                                                                                                                                                                                                                                                                                                                                                                                                                                                                                                                                                                                                                                                                                                                                                                                                                                                                                                                                |                                                                                     |        |            |        |         |                      |                      |                 |            |         |       |          |       |         |      |                   |
| Vir Biotechnology    |                                                                                                              |                                                                                                                                                                                                                                                                                                                                                                                                                                                                                                                                                                                                                                                                                                                                                                                                                                                                                                                                                                                                                                                                                                                                                                                                                |                                                                                     |        |            |        |         |                      |                      |                 |            |         |       |          |       |         |      |                   |
| 5                    | Payment or honoraria for lectures, presentations, speakers bureaus, manuscript writing or educational events | <input type="checkbox"/> <b>None</b><br><table border="1" style="width: 100%; border-collapse: collapse;"> <tr> <td style="width: 50%; border-bottom: 1px solid black;">AbbVie</td> <td rowspan="13" style="width: 50%; vertical-align: top;">Speaker</td> </tr> <tr><td style="border-bottom: 1px solid black;">Aligos</td></tr> <tr><td style="border-bottom: 1px solid black;">Arbutus</td></tr> <tr><td style="border-bottom: 1px solid black;">Assembly Biosciences</td></tr> <tr><td style="border-bottom: 1px solid black;">Bristol-Myers Squibb</td></tr> <tr><td style="border-bottom: 1px solid black;">Gilead Sciences</td></tr> <tr><td style="border-bottom: 1px solid black;">Immunocore</td></tr> <tr><td style="border-bottom: 1px solid black;">Janssen</td></tr> <tr><td style="border-bottom: 1px solid black;">Merck</td></tr> <tr><td style="border-bottom: 1px solid black;">Novartis</td></tr> <tr><td style="border-bottom: 1px solid black;">Roche</td></tr> <tr><td style="border-bottom: 1px solid black;">Shinogi</td></tr> <tr><td style="border-bottom: 1px solid black;">Sobi</td></tr> <tr><td style="border-bottom: 1px solid black;">Vir Biotechnology</td></tr> </table>    |                                                                                     | AbbVie | Speaker    | Aligos | Arbutus | Assembly Biosciences | Bristol-Myers Squibb | Gilead Sciences | Immunocore | Janssen | Merck | Novartis | Roche | Shinogi | Sobi | Vir Biotechnology |
| AbbVie               | Speaker                                                                                                      |                                                                                                                                                                                                                                                                                                                                                                                                                                                                                                                                                                                                                                                                                                                                                                                                                                                                                                                                                                                                                                                                                                                                                                                                                |                                                                                     |        |            |        |         |                      |                      |                 |            |         |       |          |       |         |      |                   |
| Aligos               |                                                                                                              |                                                                                                                                                                                                                                                                                                                                                                                                                                                                                                                                                                                                                                                                                                                                                                                                                                                                                                                                                                                                                                                                                                                                                                                                                |                                                                                     |        |            |        |         |                      |                      |                 |            |         |       |          |       |         |      |                   |
| Arbutus              |                                                                                                              |                                                                                                                                                                                                                                                                                                                                                                                                                                                                                                                                                                                                                                                                                                                                                                                                                                                                                                                                                                                                                                                                                                                                                                                                                |                                                                                     |        |            |        |         |                      |                      |                 |            |         |       |          |       |         |      |                   |
| Assembly Biosciences |                                                                                                              |                                                                                                                                                                                                                                                                                                                                                                                                                                                                                                                                                                                                                                                                                                                                                                                                                                                                                                                                                                                                                                                                                                                                                                                                                |                                                                                     |        |            |        |         |                      |                      |                 |            |         |       |          |       |         |      |                   |
| Bristol-Myers Squibb |                                                                                                              |                                                                                                                                                                                                                                                                                                                                                                                                                                                                                                                                                                                                                                                                                                                                                                                                                                                                                                                                                                                                                                                                                                                                                                                                                |                                                                                     |        |            |        |         |                      |                      |                 |            |         |       |          |       |         |      |                   |
| Gilead Sciences      |                                                                                                              |                                                                                                                                                                                                                                                                                                                                                                                                                                                                                                                                                                                                                                                                                                                                                                                                                                                                                                                                                                                                                                                                                                                                                                                                                |                                                                                     |        |            |        |         |                      |                      |                 |            |         |       |          |       |         |      |                   |
| Immunocore           |                                                                                                              |                                                                                                                                                                                                                                                                                                                                                                                                                                                                                                                                                                                                                                                                                                                                                                                                                                                                                                                                                                                                                                                                                                                                                                                                                |                                                                                     |        |            |        |         |                      |                      |                 |            |         |       |          |       |         |      |                   |
| Janssen              |                                                                                                              |                                                                                                                                                                                                                                                                                                                                                                                                                                                                                                                                                                                                                                                                                                                                                                                                                                                                                                                                                                                                                                                                                                                                                                                                                |                                                                                     |        |            |        |         |                      |                      |                 |            |         |       |          |       |         |      |                   |
| Merck                |                                                                                                              |                                                                                                                                                                                                                                                                                                                                                                                                                                                                                                                                                                                                                                                                                                                                                                                                                                                                                                                                                                                                                                                                                                                                                                                                                |                                                                                     |        |            |        |         |                      |                      |                 |            |         |       |          |       |         |      |                   |
| Novartis             |                                                                                                              |                                                                                                                                                                                                                                                                                                                                                                                                                                                                                                                                                                                                                                                                                                                                                                                                                                                                                                                                                                                                                                                                                                                                                                                                                |                                                                                     |        |            |        |         |                      |                      |                 |            |         |       |          |       |         |      |                   |
| Roche                |                                                                                                              |                                                                                                                                                                                                                                                                                                                                                                                                                                                                                                                                                                                                                                                                                                                                                                                                                                                                                                                                                                                                                                                                                                                                                                                                                |                                                                                     |        |            |        |         |                      |                      |                 |            |         |       |          |       |         |      |                   |
| Shinogi              |                                                                                                              |                                                                                                                                                                                                                                                                                                                                                                                                                                                                                                                                                                                                                                                                                                                                                                                                                                                                                                                                                                                                                                                                                                                                                                                                                |                                                                                     |        |            |        |         |                      |                      |                 |            |         |       |          |       |         |      |                   |
| Sobi                 |                                                                                                              |                                                                                                                                                                                                                                                                                                                                                                                                                                                                                                                                                                                                                                                                                                                                                                                                                                                                                                                                                                                                                                                                                                                                                                                                                |                                                                                     |        |            |        |         |                      |                      |                 |            |         |       |          |       |         |      |                   |
| Vir Biotechnology    |                                                                                                              |                                                                                                                                                                                                                                                                                                                                                                                                                                                                                                                                                                                                                                                                                                                                                                                                                                                                                                                                                                                                                                                                                                                                                                                                                |                                                                                     |        |            |        |         |                      |                      |                 |            |         |       |          |       |         |      |                   |
| 6                    | Payment for expert testimony                                                                                 | <input checked="" type="checkbox"/> <b>None</b><br><table border="1" style="width: 100%; border-collapse: collapse;"> <tr><td style="width: 50%; height: 20px;"></td><td style="width: 50%;"></td></tr> <tr><td style="height: 20px;"></td><td></td></tr> <tr><td style="height: 20px;"></td><td></td></tr> </table>                                                                                                                                                                                                                                                                                                                                                                                                                                                                                                                                                                                                                                                                                                                                                                                                                                                                                           |                                                                                     |        |            |        |         |                      |                      |                 |            |         |       |          |       |         |      |                   |
|                      |                                                                                                              |                                                                                                                                                                                                                                                                                                                                                                                                                                                                                                                                                                                                                                                                                                                                                                                                                                                                                                                                                                                                                                                                                                                                                                                                                |                                                                                     |        |            |        |         |                      |                      |                 |            |         |       |          |       |         |      |                   |
|                      |                                                                                                              |                                                                                                                                                                                                                                                                                                                                                                                                                                                                                                                                                                                                                                                                                                                                                                                                                                                                                                                                                                                                                                                                                                                                                                                                                |                                                                                     |        |            |        |         |                      |                      |                 |            |         |       |          |       |         |      |                   |
|                      |                                                                                                              |                                                                                                                                                                                                                                                                                                                                                                                                                                                                                                                                                                                                                                                                                                                                                                                                                                                                                                                                                                                                                                                                                                                                                                                                                |                                                                                     |        |            |        |         |                      |                      |                 |            |         |       |          |       |         |      |                   |

|                      |                                                                                                   | Name all entities with whom you have this relationship or indicate none (add rows as needed)                                                                                                                                                                                                                                                                                                                                                                                                                                                                                                                                                                                                                                  | Specifications/Comments (e.g., if payments were made to you or to your institution) |                |        |  |         |  |                      |  |                      |  |                 |  |            |  |         |  |       |  |          |  |       |  |         |  |      |  |                   |  |  |
|----------------------|---------------------------------------------------------------------------------------------------|-------------------------------------------------------------------------------------------------------------------------------------------------------------------------------------------------------------------------------------------------------------------------------------------------------------------------------------------------------------------------------------------------------------------------------------------------------------------------------------------------------------------------------------------------------------------------------------------------------------------------------------------------------------------------------------------------------------------------------|-------------------------------------------------------------------------------------|----------------|--------|--|---------|--|----------------------|--|----------------------|--|-----------------|--|------------|--|---------|--|-------|--|----------|--|-------|--|---------|--|------|--|-------------------|--|--|
| 7                    | Support for attending meetings and/or travel                                                      | <input checked="" type="checkbox"/> <b>None</b><br><table border="1" style="width: 100%; border-collapse: collapse;"> <tr><td style="width: 50%; height: 20px;"></td><td style="width: 50%;"></td></tr> <tr><td style="height: 20px;"></td><td></td></tr> <tr><td style="height: 20px;"></td><td></td></tr> </table>                                                                                                                                                                                                                                                                                                                                                                                                          |                                                                                     |                |        |  |         |  |                      |  |                      |  |                 |  |            |  |         |  |       |  |          |  |       |  |         |  |      |  |                   |  |  |
|                      |                                                                                                   |                                                                                                                                                                                                                                                                                                                                                                                                                                                                                                                                                                                                                                                                                                                               |                                                                                     |                |        |  |         |  |                      |  |                      |  |                 |  |            |  |         |  |       |  |          |  |       |  |         |  |      |  |                   |  |  |
|                      |                                                                                                   |                                                                                                                                                                                                                                                                                                                                                                                                                                                                                                                                                                                                                                                                                                                               |                                                                                     |                |        |  |         |  |                      |  |                      |  |                 |  |            |  |         |  |       |  |          |  |       |  |         |  |      |  |                   |  |  |
|                      |                                                                                                   |                                                                                                                                                                                                                                                                                                                                                                                                                                                                                                                                                                                                                                                                                                                               |                                                                                     |                |        |  |         |  |                      |  |                      |  |                 |  |            |  |         |  |       |  |          |  |       |  |         |  |      |  |                   |  |  |
| 8                    | Patents planned, issued or pending                                                                | <input checked="" type="checkbox"/> <b>None</b><br><table border="1" style="width: 100%; border-collapse: collapse;"> <tr><td style="width: 50%; height: 20px;"></td><td style="width: 50%;"></td></tr> <tr><td style="height: 20px;"></td><td></td></tr> <tr><td style="height: 20px;"></td><td></td></tr> </table>                                                                                                                                                                                                                                                                                                                                                                                                          |                                                                                     |                |        |  |         |  |                      |  |                      |  |                 |  |            |  |         |  |       |  |          |  |       |  |         |  |      |  |                   |  |  |
|                      |                                                                                                   |                                                                                                                                                                                                                                                                                                                                                                                                                                                                                                                                                                                                                                                                                                                               |                                                                                     |                |        |  |         |  |                      |  |                      |  |                 |  |            |  |         |  |       |  |          |  |       |  |         |  |      |  |                   |  |  |
|                      |                                                                                                   |                                                                                                                                                                                                                                                                                                                                                                                                                                                                                                                                                                                                                                                                                                                               |                                                                                     |                |        |  |         |  |                      |  |                      |  |                 |  |            |  |         |  |       |  |          |  |       |  |         |  |      |  |                   |  |  |
|                      |                                                                                                   |                                                                                                                                                                                                                                                                                                                                                                                                                                                                                                                                                                                                                                                                                                                               |                                                                                     |                |        |  |         |  |                      |  |                      |  |                 |  |            |  |         |  |       |  |          |  |       |  |         |  |      |  |                   |  |  |
| 9                    | Participation on a Data Safety Monitoring Board or Advisory Board                                 | <input type="checkbox"/> <b>None</b><br><table border="1" style="width: 100%; border-collapse: collapse;"> <tr> <td style="width: 50%;">AbbVie</td> <td style="width: 50%;">Advisory board</td> </tr> <tr><td>Aligos</td><td></td></tr> <tr><td>Arbutus</td><td></td></tr> <tr><td>Assembly Biosciences</td><td></td></tr> <tr><td>Bristol-Myers Squibb</td><td></td></tr> <tr><td>Gilead Sciences</td><td></td></tr> <tr><td>Immunocore</td><td></td></tr> <tr><td>Janssen</td><td></td></tr> <tr><td>Merck</td><td></td></tr> <tr><td>Novartis</td><td></td></tr> <tr><td>Roche</td><td></td></tr> <tr><td>Shinogi</td><td></td></tr> <tr><td>Sobi</td><td></td></tr> <tr><td>Vir Biotechnology</td><td></td></tr> </table> | AbbVie                                                                              | Advisory board | Aligos |  | Arbutus |  | Assembly Biosciences |  | Bristol-Myers Squibb |  | Gilead Sciences |  | Immunocore |  | Janssen |  | Merck |  | Novartis |  | Roche |  | Shinogi |  | Sobi |  | Vir Biotechnology |  |  |
| AbbVie               | Advisory board                                                                                    |                                                                                                                                                                                                                                                                                                                                                                                                                                                                                                                                                                                                                                                                                                                               |                                                                                     |                |        |  |         |  |                      |  |                      |  |                 |  |            |  |         |  |       |  |          |  |       |  |         |  |      |  |                   |  |  |
| Aligos               |                                                                                                   |                                                                                                                                                                                                                                                                                                                                                                                                                                                                                                                                                                                                                                                                                                                               |                                                                                     |                |        |  |         |  |                      |  |                      |  |                 |  |            |  |         |  |       |  |          |  |       |  |         |  |      |  |                   |  |  |
| Arbutus              |                                                                                                   |                                                                                                                                                                                                                                                                                                                                                                                                                                                                                                                                                                                                                                                                                                                               |                                                                                     |                |        |  |         |  |                      |  |                      |  |                 |  |            |  |         |  |       |  |          |  |       |  |         |  |      |  |                   |  |  |
| Assembly Biosciences |                                                                                                   |                                                                                                                                                                                                                                                                                                                                                                                                                                                                                                                                                                                                                                                                                                                               |                                                                                     |                |        |  |         |  |                      |  |                      |  |                 |  |            |  |         |  |       |  |          |  |       |  |         |  |      |  |                   |  |  |
| Bristol-Myers Squibb |                                                                                                   |                                                                                                                                                                                                                                                                                                                                                                                                                                                                                                                                                                                                                                                                                                                               |                                                                                     |                |        |  |         |  |                      |  |                      |  |                 |  |            |  |         |  |       |  |          |  |       |  |         |  |      |  |                   |  |  |
| Gilead Sciences      |                                                                                                   |                                                                                                                                                                                                                                                                                                                                                                                                                                                                                                                                                                                                                                                                                                                               |                                                                                     |                |        |  |         |  |                      |  |                      |  |                 |  |            |  |         |  |       |  |          |  |       |  |         |  |      |  |                   |  |  |
| Immunocore           |                                                                                                   |                                                                                                                                                                                                                                                                                                                                                                                                                                                                                                                                                                                                                                                                                                                               |                                                                                     |                |        |  |         |  |                      |  |                      |  |                 |  |            |  |         |  |       |  |          |  |       |  |         |  |      |  |                   |  |  |
| Janssen              |                                                                                                   |                                                                                                                                                                                                                                                                                                                                                                                                                                                                                                                                                                                                                                                                                                                               |                                                                                     |                |        |  |         |  |                      |  |                      |  |                 |  |            |  |         |  |       |  |          |  |       |  |         |  |      |  |                   |  |  |
| Merck                |                                                                                                   |                                                                                                                                                                                                                                                                                                                                                                                                                                                                                                                                                                                                                                                                                                                               |                                                                                     |                |        |  |         |  |                      |  |                      |  |                 |  |            |  |         |  |       |  |          |  |       |  |         |  |      |  |                   |  |  |
| Novartis             |                                                                                                   |                                                                                                                                                                                                                                                                                                                                                                                                                                                                                                                                                                                                                                                                                                                               |                                                                                     |                |        |  |         |  |                      |  |                      |  |                 |  |            |  |         |  |       |  |          |  |       |  |         |  |      |  |                   |  |  |
| Roche                |                                                                                                   |                                                                                                                                                                                                                                                                                                                                                                                                                                                                                                                                                                                                                                                                                                                               |                                                                                     |                |        |  |         |  |                      |  |                      |  |                 |  |            |  |         |  |       |  |          |  |       |  |         |  |      |  |                   |  |  |
| Shinogi              |                                                                                                   |                                                                                                                                                                                                                                                                                                                                                                                                                                                                                                                                                                                                                                                                                                                               |                                                                                     |                |        |  |         |  |                      |  |                      |  |                 |  |            |  |         |  |       |  |          |  |       |  |         |  |      |  |                   |  |  |
| Sobi                 |                                                                                                   |                                                                                                                                                                                                                                                                                                                                                                                                                                                                                                                                                                                                                                                                                                                               |                                                                                     |                |        |  |         |  |                      |  |                      |  |                 |  |            |  |         |  |       |  |          |  |       |  |         |  |      |  |                   |  |  |
| Vir Biotechnology    |                                                                                                   |                                                                                                                                                                                                                                                                                                                                                                                                                                                                                                                                                                                                                                                                                                                               |                                                                                     |                |        |  |         |  |                      |  |                      |  |                 |  |            |  |         |  |       |  |          |  |       |  |         |  |      |  |                   |  |  |
| 10                   | Leadership or fiduciary role in other board, society, committee or advocacy group, paid or unpaid | <input checked="" type="checkbox"/> <b>None</b><br><table border="1" style="width: 100%; border-collapse: collapse;"> <tr><td style="width: 50%; height: 20px;"></td><td style="width: 50%;"></td></tr> <tr><td style="height: 20px;"></td><td></td></tr> <tr><td style="height: 20px;"></td><td></td></tr> </table>                                                                                                                                                                                                                                                                                                                                                                                                          |                                                                                     |                |        |  |         |  |                      |  |                      |  |                 |  |            |  |         |  |       |  |          |  |       |  |         |  |      |  |                   |  |  |
|                      |                                                                                                   |                                                                                                                                                                                                                                                                                                                                                                                                                                                                                                                                                                                                                                                                                                                               |                                                                                     |                |        |  |         |  |                      |  |                      |  |                 |  |            |  |         |  |       |  |          |  |       |  |         |  |      |  |                   |  |  |
|                      |                                                                                                   |                                                                                                                                                                                                                                                                                                                                                                                                                                                                                                                                                                                                                                                                                                                               |                                                                                     |                |        |  |         |  |                      |  |                      |  |                 |  |            |  |         |  |       |  |          |  |       |  |         |  |      |  |                   |  |  |
|                      |                                                                                                   |                                                                                                                                                                                                                                                                                                                                                                                                                                                                                                                                                                                                                                                                                                                               |                                                                                     |                |        |  |         |  |                      |  |                      |  |                 |  |            |  |         |  |       |  |          |  |       |  |         |  |      |  |                   |  |  |
| 11                   | Stock or stock options                                                                            | <input checked="" type="checkbox"/> <b>None</b><br><table border="1" style="width: 100%; border-collapse: collapse;"> <tr><td style="width: 50%; height: 20px;"></td><td style="width: 50%;"></td></tr> <tr><td style="height: 20px;"></td><td></td></tr> <tr><td style="height: 20px;"></td><td></td></tr> </table>                                                                                                                                                                                                                                                                                                                                                                                                          |                                                                                     |                |        |  |         |  |                      |  |                      |  |                 |  |            |  |         |  |       |  |          |  |       |  |         |  |      |  |                   |  |  |
|                      |                                                                                                   |                                                                                                                                                                                                                                                                                                                                                                                                                                                                                                                                                                                                                                                                                                                               |                                                                                     |                |        |  |         |  |                      |  |                      |  |                 |  |            |  |         |  |       |  |          |  |       |  |         |  |      |  |                   |  |  |
|                      |                                                                                                   |                                                                                                                                                                                                                                                                                                                                                                                                                                                                                                                                                                                                                                                                                                                               |                                                                                     |                |        |  |         |  |                      |  |                      |  |                 |  |            |  |         |  |       |  |          |  |       |  |         |  |      |  |                   |  |  |
|                      |                                                                                                   |                                                                                                                                                                                                                                                                                                                                                                                                                                                                                                                                                                                                                                                                                                                               |                                                                                     |                |        |  |         |  |                      |  |                      |  |                 |  |            |  |         |  |       |  |          |  |       |  |         |  |      |  |                   |  |  |
| 12                   | Receipt of equipment, materials, drugs, medical writing, gifts or other services                  | <input checked="" type="checkbox"/> <b>None</b><br><table border="1" style="width: 100%; border-collapse: collapse;"> <tr><td style="width: 50%; height: 20px;"></td><td style="width: 50%;"></td></tr> <tr><td style="height: 20px;"></td><td></td></tr> <tr><td style="height: 20px;"></td><td></td></tr> </table>                                                                                                                                                                                                                                                                                                                                                                                                          |                                                                                     |                |        |  |         |  |                      |  |                      |  |                 |  |            |  |         |  |       |  |          |  |       |  |         |  |      |  |                   |  |  |
|                      |                                                                                                   |                                                                                                                                                                                                                                                                                                                                                                                                                                                                                                                                                                                                                                                                                                                               |                                                                                     |                |        |  |         |  |                      |  |                      |  |                 |  |            |  |         |  |       |  |          |  |       |  |         |  |      |  |                   |  |  |
|                      |                                                                                                   |                                                                                                                                                                                                                                                                                                                                                                                                                                                                                                                                                                                                                                                                                                                               |                                                                                     |                |        |  |         |  |                      |  |                      |  |                 |  |            |  |         |  |       |  |          |  |       |  |         |  |      |  |                   |  |  |
|                      |                                                                                                   |                                                                                                                                                                                                                                                                                                                                                                                                                                                                                                                                                                                                                                                                                                                               |                                                                                     |                |        |  |         |  |                      |  |                      |  |                 |  |            |  |         |  |       |  |          |  |       |  |         |  |      |  |                   |  |  |

|    |                                            | Name all entities with whom you have this relationship or indicate none (add rows as needed) | Specifications/Comments (e.g., if payments were made to you or to your institution) |
|----|--------------------------------------------|----------------------------------------------------------------------------------------------|-------------------------------------------------------------------------------------|
| 13 | Other financial or non-financial interests | <input checked="" type="checkbox"/> None                                                     |                                                                                     |
|    |                                            |                                                                                              |                                                                                     |
|    |                                            |                                                                                              |                                                                                     |
|    |                                            |                                                                                              |                                                                                     |

Please place an "X" next to the following statement to indicate your agreement:

I certify that I have answered every question and have not altered the wording of any of the questions on this form.

## ICMJE DISCLOSURE FORM

**Date:** 8/7/2023

**Your Name:** Mark S Sulkowski

**Manuscript Title:** Safety and off-treatment response of patients with chronic hepatitis B virus infection receiving long-term open-label vebicorvir

**Manuscript Number (if known):** Click or tap here to enter text.

In the interest of transparency, we ask you to disclose all relationships/activities/interests listed below that are related to the content of your manuscript. "Related" means any relation with for-profit or not-for-profit third parties whose interests may be affected by the content of the manuscript. Disclosure represents a commitment to transparency and does not necessarily indicate a bias. If you are in doubt about whether to list a relationship/activity/interest, it is preferable that you do so.

In the interest of transparency, we ask you to disclose all relationships/activities/interests listed below that are related to the content of your manuscript. "Related" means any relation with for-profit or not-for-profit third parties whose interests may be affected by the content of the manuscript. Disclosure represents a commitment to transparency and does not necessarily indicate a bias. If you are in doubt about whether to list a relationship/activity/interest, it is preferable that you do so.

The author's relationships/activities/interests should be defined broadly. For example, if your manuscript pertains to the epidemiology of hypertension, you should declare all relationships with manufacturers of antihypertensive medication, even if that medication is not mentioned in the manuscript.

In item #1 below, report all support for the work reported in this manuscript without time limit. For all other items, the time frame for disclosure is the past 36 months.

|                                                    | Name all entities with whom you have this relationship or indicate none (add rows as needed)                                                                                   | Specifications/Comments (e.g., if payments were made to you or to your institution)                                                                                                                                                                                                                                                                                                                                                     |        |               |                      |                 |         |                                           |                   |
|----------------------------------------------------|--------------------------------------------------------------------------------------------------------------------------------------------------------------------------------|-----------------------------------------------------------------------------------------------------------------------------------------------------------------------------------------------------------------------------------------------------------------------------------------------------------------------------------------------------------------------------------------------------------------------------------------|--------|---------------|----------------------|-----------------|---------|-------------------------------------------|-------------------|
| Time frame: Since the initial planning of the work |                                                                                                                                                                                |                                                                                                                                                                                                                                                                                                                                                                                                                                         |        |               |                      |                 |         |                                           |                   |
| <b>1</b>                                           | All support for the present manuscript (e.g., funding, provision of study materials, medical writing, article processing charges, etc.)<br><b>No time limit for this item.</b> | <input checked="" type="checkbox"/> <b>None</b><br><table border="1" style="width: 100%; border-collapse: collapse; margin-top: 5px;"> <tr><td style="height: 20px;"> </td><td style="width: 20%;"></td></tr> <tr><td style="height: 20px;"> </td><td></td></tr> <tr><td style="height: 20px;"> </td><td style="text-align: right; font-size: small;">Click the tab key to add additional rows.</td></tr> </table>                      |        |               |                      |                 |         | Click the tab key to add additional rows. |                   |
|                                                    |                                                                                                                                                                                |                                                                                                                                                                                                                                                                                                                                                                                                                                         |        |               |                      |                 |         |                                           |                   |
|                                                    |                                                                                                                                                                                |                                                                                                                                                                                                                                                                                                                                                                                                                                         |        |               |                      |                 |         |                                           |                   |
|                                                    | Click the tab key to add additional rows.                                                                                                                                      |                                                                                                                                                                                                                                                                                                                                                                                                                                         |        |               |                      |                 |         |                                           |                   |
| Time frame: past 36 months                         |                                                                                                                                                                                |                                                                                                                                                                                                                                                                                                                                                                                                                                         |        |               |                      |                 |         |                                           |                   |
| <b>2</b>                                           | Grants or contracts from any entity (if not indicated in item #1 above).                                                                                                       | <input type="checkbox"/> <b>None</b><br><table border="1" style="width: 100%; border-collapse: collapse; margin-top: 5px;"> <tr><td style="width: 60%;">AbbVie</td><td rowspan="6" style="vertical-align: top;">Grant support</td></tr> <tr><td>Assembly Biosciences</td></tr> <tr><td>GlaxoSmithKline</td></tr> <tr><td>Janssen</td></tr> <tr><td>National Institutes of Health</td></tr> <tr><td>Vir Biotechnology</td></tr> </table> | AbbVie | Grant support | Assembly Biosciences | GlaxoSmithKline | Janssen | National Institutes of Health             | Vir Biotechnology |
| AbbVie                                             | Grant support                                                                                                                                                                  |                                                                                                                                                                                                                                                                                                                                                                                                                                         |        |               |                      |                 |         |                                           |                   |
| Assembly Biosciences                               |                                                                                                                                                                                |                                                                                                                                                                                                                                                                                                                                                                                                                                         |        |               |                      |                 |         |                                           |                   |
| GlaxoSmithKline                                    |                                                                                                                                                                                |                                                                                                                                                                                                                                                                                                                                                                                                                                         |        |               |                      |                 |         |                                           |                   |
| Janssen                                            |                                                                                                                                                                                |                                                                                                                                                                                                                                                                                                                                                                                                                                         |        |               |                      |                 |         |                                           |                   |
| National Institutes of Health                      |                                                                                                                                                                                |                                                                                                                                                                                                                                                                                                                                                                                                                                         |        |               |                      |                 |         |                                           |                   |
| Vir Biotechnology                                  |                                                                                                                                                                                |                                                                                                                                                                                                                                                                                                                                                                                                                                         |        |               |                      |                 |         |                                           |                   |

|                       |                                                                                                              | Name all entities with whom you have this relationship or indicate none (add rows as needed)                                                                                                                                                                                                                                                                                                                                                                                                                                                                                                                                                                                                                                                                                                                                                                                                                                                                                  | Specifications/Comments (e.g., if payments were made to you or to your institution) |               |                     |                   |                      |                 |                 |     |            |                       |                     |  |
|-----------------------|--------------------------------------------------------------------------------------------------------------|-------------------------------------------------------------------------------------------------------------------------------------------------------------------------------------------------------------------------------------------------------------------------------------------------------------------------------------------------------------------------------------------------------------------------------------------------------------------------------------------------------------------------------------------------------------------------------------------------------------------------------------------------------------------------------------------------------------------------------------------------------------------------------------------------------------------------------------------------------------------------------------------------------------------------------------------------------------------------------|-------------------------------------------------------------------------------------|---------------|---------------------|-------------------|----------------------|-----------------|-----------------|-----|------------|-----------------------|---------------------|--|
| 3                     | Royalties or licenses                                                                                        | <input checked="" type="checkbox"/> <b>None</b><br><table border="1" style="width: 100%; border-collapse: collapse;"> <tr><td style="width: 50%; height: 20px;"></td><td style="width: 50%;"></td></tr> <tr><td style="height: 20px;"></td><td></td></tr> <tr><td style="height: 20px;"></td><td></td></tr> </table>                                                                                                                                                                                                                                                                                                                                                                                                                                                                                                                                                                                                                                                          |                                                                                     |               |                     |                   |                      |                 |                 |     |            |                       |                     |  |
|                       |                                                                                                              |                                                                                                                                                                                                                                                                                                                                                                                                                                                                                                                                                                                                                                                                                                                                                                                                                                                                                                                                                                               |                                                                                     |               |                     |                   |                      |                 |                 |     |            |                       |                     |  |
|                       |                                                                                                              |                                                                                                                                                                                                                                                                                                                                                                                                                                                                                                                                                                                                                                                                                                                                                                                                                                                                                                                                                                               |                                                                                     |               |                     |                   |                      |                 |                 |     |            |                       |                     |  |
|                       |                                                                                                              |                                                                                                                                                                                                                                                                                                                                                                                                                                                                                                                                                                                                                                                                                                                                                                                                                                                                                                                                                                               |                                                                                     |               |                     |                   |                      |                 |                 |     |            |                       |                     |  |
| 4                     | Consulting fees                                                                                              | <input type="checkbox"/> <b>None</b><br><table border="1" style="width: 100%; border-collapse: collapse;"> <tr> <td style="width: 50%; border-bottom: 1px solid black;">AbbVie</td> <td rowspan="10" style="width: 50%; vertical-align: top;">Personal fees</td> </tr> <tr><td style="border-bottom: 1px solid black;">Antios Therapeutics</td></tr> <tr><td style="border-bottom: 1px solid black;">Arbutus Biopharma</td></tr> <tr><td style="border-bottom: 1px solid black;">Atea Pharmaceuticals</td></tr> <tr><td style="border-bottom: 1px solid black;">Gilead Sciences</td></tr> <tr><td style="border-bottom: 1px solid black;">GlaxoSmithKline</td></tr> <tr><td style="border-bottom: 1px solid black;">F2G</td></tr> <tr><td style="border-bottom: 1px solid black;">Immunocore</td></tr> <tr><td style="border-bottom: 1px solid black;">Precision Biosciences</td></tr> <tr><td style="border-bottom: 1px solid black;">Virion Therapeutics</td></tr> </table> | AbbVie                                                                              | Personal fees | Antios Therapeutics | Arbutus Biopharma | Atea Pharmaceuticals | Gilead Sciences | GlaxoSmithKline | F2G | Immunocore | Precision Biosciences | Virion Therapeutics |  |
| AbbVie                | Personal fees                                                                                                |                                                                                                                                                                                                                                                                                                                                                                                                                                                                                                                                                                                                                                                                                                                                                                                                                                                                                                                                                                               |                                                                                     |               |                     |                   |                      |                 |                 |     |            |                       |                     |  |
| Antios Therapeutics   |                                                                                                              |                                                                                                                                                                                                                                                                                                                                                                                                                                                                                                                                                                                                                                                                                                                                                                                                                                                                                                                                                                               |                                                                                     |               |                     |                   |                      |                 |                 |     |            |                       |                     |  |
| Arbutus Biopharma     |                                                                                                              |                                                                                                                                                                                                                                                                                                                                                                                                                                                                                                                                                                                                                                                                                                                                                                                                                                                                                                                                                                               |                                                                                     |               |                     |                   |                      |                 |                 |     |            |                       |                     |  |
| Atea Pharmaceuticals  |                                                                                                              |                                                                                                                                                                                                                                                                                                                                                                                                                                                                                                                                                                                                                                                                                                                                                                                                                                                                                                                                                                               |                                                                                     |               |                     |                   |                      |                 |                 |     |            |                       |                     |  |
| Gilead Sciences       |                                                                                                              |                                                                                                                                                                                                                                                                                                                                                                                                                                                                                                                                                                                                                                                                                                                                                                                                                                                                                                                                                                               |                                                                                     |               |                     |                   |                      |                 |                 |     |            |                       |                     |  |
| GlaxoSmithKline       |                                                                                                              |                                                                                                                                                                                                                                                                                                                                                                                                                                                                                                                                                                                                                                                                                                                                                                                                                                                                                                                                                                               |                                                                                     |               |                     |                   |                      |                 |                 |     |            |                       |                     |  |
| F2G                   |                                                                                                              |                                                                                                                                                                                                                                                                                                                                                                                                                                                                                                                                                                                                                                                                                                                                                                                                                                                                                                                                                                               |                                                                                     |               |                     |                   |                      |                 |                 |     |            |                       |                     |  |
| Immunocore            |                                                                                                              |                                                                                                                                                                                                                                                                                                                                                                                                                                                                                                                                                                                                                                                                                                                                                                                                                                                                                                                                                                               |                                                                                     |               |                     |                   |                      |                 |                 |     |            |                       |                     |  |
| Precision Biosciences |                                                                                                              |                                                                                                                                                                                                                                                                                                                                                                                                                                                                                                                                                                                                                                                                                                                                                                                                                                                                                                                                                                               |                                                                                     |               |                     |                   |                      |                 |                 |     |            |                       |                     |  |
| Virion Therapeutics   |                                                                                                              |                                                                                                                                                                                                                                                                                                                                                                                                                                                                                                                                                                                                                                                                                                                                                                                                                                                                                                                                                                               |                                                                                     |               |                     |                   |                      |                 |                 |     |            |                       |                     |  |
| 5                     | Payment or honoraria for lectures, presentations, speakers bureaus, manuscript writing or educational events | <input checked="" type="checkbox"/> <b>None</b><br><table border="1" style="width: 100%; border-collapse: collapse;"> <tr><td style="width: 50%; height: 20px;"></td><td style="width: 50%;"></td></tr> <tr><td style="height: 20px;"></td><td></td></tr> <tr><td style="height: 20px;"></td><td></td></tr> </table>                                                                                                                                                                                                                                                                                                                                                                                                                                                                                                                                                                                                                                                          |                                                                                     |               |                     |                   |                      |                 |                 |     |            |                       |                     |  |
|                       |                                                                                                              |                                                                                                                                                                                                                                                                                                                                                                                                                                                                                                                                                                                                                                                                                                                                                                                                                                                                                                                                                                               |                                                                                     |               |                     |                   |                      |                 |                 |     |            |                       |                     |  |
|                       |                                                                                                              |                                                                                                                                                                                                                                                                                                                                                                                                                                                                                                                                                                                                                                                                                                                                                                                                                                                                                                                                                                               |                                                                                     |               |                     |                   |                      |                 |                 |     |            |                       |                     |  |
|                       |                                                                                                              |                                                                                                                                                                                                                                                                                                                                                                                                                                                                                                                                                                                                                                                                                                                                                                                                                                                                                                                                                                               |                                                                                     |               |                     |                   |                      |                 |                 |     |            |                       |                     |  |
| 6                     | Payment for expert testimony                                                                                 | <input checked="" type="checkbox"/> <b>None</b><br><table border="1" style="width: 100%; border-collapse: collapse;"> <tr><td style="width: 50%; height: 20px;"></td><td style="width: 50%;"></td></tr> <tr><td style="height: 20px;"></td><td></td></tr> <tr><td style="height: 20px;"></td><td></td></tr> </table>                                                                                                                                                                                                                                                                                                                                                                                                                                                                                                                                                                                                                                                          |                                                                                     |               |                     |                   |                      |                 |                 |     |            |                       |                     |  |
|                       |                                                                                                              |                                                                                                                                                                                                                                                                                                                                                                                                                                                                                                                                                                                                                                                                                                                                                                                                                                                                                                                                                                               |                                                                                     |               |                     |                   |                      |                 |                 |     |            |                       |                     |  |
|                       |                                                                                                              |                                                                                                                                                                                                                                                                                                                                                                                                                                                                                                                                                                                                                                                                                                                                                                                                                                                                                                                                                                               |                                                                                     |               |                     |                   |                      |                 |                 |     |            |                       |                     |  |
|                       |                                                                                                              |                                                                                                                                                                                                                                                                                                                                                                                                                                                                                                                                                                                                                                                                                                                                                                                                                                                                                                                                                                               |                                                                                     |               |                     |                   |                      |                 |                 |     |            |                       |                     |  |
| 7                     | Support for attending meetings and/or travel                                                                 | <input checked="" type="checkbox"/> <b>None</b><br><table border="1" style="width: 100%; border-collapse: collapse;"> <tr><td style="width: 50%; height: 20px;"></td><td style="width: 50%;"></td></tr> <tr><td style="height: 20px;"></td><td></td></tr> <tr><td style="height: 20px;"></td><td></td></tr> </table>                                                                                                                                                                                                                                                                                                                                                                                                                                                                                                                                                                                                                                                          |                                                                                     |               |                     |                   |                      |                 |                 |     |            |                       |                     |  |
|                       |                                                                                                              |                                                                                                                                                                                                                                                                                                                                                                                                                                                                                                                                                                                                                                                                                                                                                                                                                                                                                                                                                                               |                                                                                     |               |                     |                   |                      |                 |                 |     |            |                       |                     |  |
|                       |                                                                                                              |                                                                                                                                                                                                                                                                                                                                                                                                                                                                                                                                                                                                                                                                                                                                                                                                                                                                                                                                                                               |                                                                                     |               |                     |                   |                      |                 |                 |     |            |                       |                     |  |
|                       |                                                                                                              |                                                                                                                                                                                                                                                                                                                                                                                                                                                                                                                                                                                                                                                                                                                                                                                                                                                                                                                                                                               |                                                                                     |               |                     |                   |                      |                 |                 |     |            |                       |                     |  |
| 8                     | Patents planned, issued or pending                                                                           | <input checked="" type="checkbox"/> <b>None</b><br><table border="1" style="width: 100%; border-collapse: collapse;"> <tr><td style="width: 50%; height: 20px;"></td><td style="width: 50%;"></td></tr> <tr><td style="height: 20px;"></td><td></td></tr> <tr><td style="height: 20px;"></td><td></td></tr> </table>                                                                                                                                                                                                                                                                                                                                                                                                                                                                                                                                                                                                                                                          |                                                                                     |               |                     |                   |                      |                 |                 |     |            |                       |                     |  |
|                       |                                                                                                              |                                                                                                                                                                                                                                                                                                                                                                                                                                                                                                                                                                                                                                                                                                                                                                                                                                                                                                                                                                               |                                                                                     |               |                     |                   |                      |                 |                 |     |            |                       |                     |  |
|                       |                                                                                                              |                                                                                                                                                                                                                                                                                                                                                                                                                                                                                                                                                                                                                                                                                                                                                                                                                                                                                                                                                                               |                                                                                     |               |                     |                   |                      |                 |                 |     |            |                       |                     |  |
|                       |                                                                                                              |                                                                                                                                                                                                                                                                                                                                                                                                                                                                                                                                                                                                                                                                                                                                                                                                                                                                                                                                                                               |                                                                                     |               |                     |                   |                      |                 |                 |     |            |                       |                     |  |
| 9                     | Participation on a Data Safety Monitoring                                                                    | <input checked="" type="checkbox"/> <b>None</b><br><table border="1" style="width: 100%; border-collapse: collapse;"> <tr><td style="width: 50%; height: 20px;"></td><td style="width: 50%;"></td></tr> </table>                                                                                                                                                                                                                                                                                                                                                                                                                                                                                                                                                                                                                                                                                                                                                              |                                                                                     |               |                     |                   |                      |                 |                 |     |            |                       |                     |  |
|                       |                                                                                                              |                                                                                                                                                                                                                                                                                                                                                                                                                                                                                                                                                                                                                                                                                                                                                                                                                                                                                                                                                                               |                                                                                     |               |                     |                   |                      |                 |                 |     |            |                       |                     |  |

|           |                                                                                                   | Name all entities with whom you have this relationship or indicate none (add rows as needed)                                               | Specifications/Comments (e.g., if payments were made to you or to your institution) |  |  |                                                                                         |  |  |  |
|-----------|---------------------------------------------------------------------------------------------------|--------------------------------------------------------------------------------------------------------------------------------------------|-------------------------------------------------------------------------------------|--|--|-----------------------------------------------------------------------------------------|--|--|--|
|           | Board or Advisory Board                                                                           | <table border="1"> <tr><td> </td></tr> <tr><td> </td></tr> <tr><td> </td></tr> </table>                                                    |                                                                                     |  |  | <table border="1"> <tr><td> </td></tr> </table>                                         |  |  |  |
|           |                                                                                                   |                                                                                                                                            |                                                                                     |  |  |                                                                                         |  |  |  |
|           |                                                                                                   |                                                                                                                                            |                                                                                     |  |  |                                                                                         |  |  |  |
|           |                                                                                                   |                                                                                                                                            |                                                                                     |  |  |                                                                                         |  |  |  |
|           |                                                                                                   |                                                                                                                                            |                                                                                     |  |  |                                                                                         |  |  |  |
| <b>10</b> | Leadership or fiduciary role in other board, society, committee or advocacy group, paid or unpaid | <input checked="" type="checkbox"/> <b>None</b><br><table border="1"> <tr><td> </td></tr> <tr><td> </td></tr> <tr><td> </td></tr> </table> |                                                                                     |  |  | <table border="1"> <tr><td> </td></tr> <tr><td> </td></tr> <tr><td> </td></tr> </table> |  |  |  |
|           |                                                                                                   |                                                                                                                                            |                                                                                     |  |  |                                                                                         |  |  |  |
|           |                                                                                                   |                                                                                                                                            |                                                                                     |  |  |                                                                                         |  |  |  |
|           |                                                                                                   |                                                                                                                                            |                                                                                     |  |  |                                                                                         |  |  |  |
|           |                                                                                                   |                                                                                                                                            |                                                                                     |  |  |                                                                                         |  |  |  |
|           |                                                                                                   |                                                                                                                                            |                                                                                     |  |  |                                                                                         |  |  |  |
|           |                                                                                                   |                                                                                                                                            |                                                                                     |  |  |                                                                                         |  |  |  |
| <b>11</b> | Stock or stock options                                                                            | <input checked="" type="checkbox"/> <b>None</b><br><table border="1"> <tr><td> </td></tr> <tr><td> </td></tr> <tr><td> </td></tr> </table> |                                                                                     |  |  | <table border="1"> <tr><td> </td></tr> <tr><td> </td></tr> <tr><td> </td></tr> </table> |  |  |  |
|           |                                                                                                   |                                                                                                                                            |                                                                                     |  |  |                                                                                         |  |  |  |
|           |                                                                                                   |                                                                                                                                            |                                                                                     |  |  |                                                                                         |  |  |  |
|           |                                                                                                   |                                                                                                                                            |                                                                                     |  |  |                                                                                         |  |  |  |
|           |                                                                                                   |                                                                                                                                            |                                                                                     |  |  |                                                                                         |  |  |  |
|           |                                                                                                   |                                                                                                                                            |                                                                                     |  |  |                                                                                         |  |  |  |
|           |                                                                                                   |                                                                                                                                            |                                                                                     |  |  |                                                                                         |  |  |  |
| <b>12</b> | Receipt of equipment, materials, drugs, medical writing, gifts or other services                  | <input checked="" type="checkbox"/> <b>None</b><br><table border="1"> <tr><td> </td></tr> <tr><td> </td></tr> <tr><td> </td></tr> </table> |                                                                                     |  |  | <table border="1"> <tr><td> </td></tr> <tr><td> </td></tr> <tr><td> </td></tr> </table> |  |  |  |
|           |                                                                                                   |                                                                                                                                            |                                                                                     |  |  |                                                                                         |  |  |  |
|           |                                                                                                   |                                                                                                                                            |                                                                                     |  |  |                                                                                         |  |  |  |
|           |                                                                                                   |                                                                                                                                            |                                                                                     |  |  |                                                                                         |  |  |  |
|           |                                                                                                   |                                                                                                                                            |                                                                                     |  |  |                                                                                         |  |  |  |
|           |                                                                                                   |                                                                                                                                            |                                                                                     |  |  |                                                                                         |  |  |  |
|           |                                                                                                   |                                                                                                                                            |                                                                                     |  |  |                                                                                         |  |  |  |
| <b>13</b> | Other financial or non-financial interests                                                        | <input checked="" type="checkbox"/> <b>None</b><br><table border="1"> <tr><td> </td></tr> <tr><td> </td></tr> <tr><td> </td></tr> </table> |                                                                                     |  |  | <table border="1"> <tr><td> </td></tr> <tr><td> </td></tr> <tr><td> </td></tr> </table> |  |  |  |
|           |                                                                                                   |                                                                                                                                            |                                                                                     |  |  |                                                                                         |  |  |  |
|           |                                                                                                   |                                                                                                                                            |                                                                                     |  |  |                                                                                         |  |  |  |
|           |                                                                                                   |                                                                                                                                            |                                                                                     |  |  |                                                                                         |  |  |  |
|           |                                                                                                   |                                                                                                                                            |                                                                                     |  |  |                                                                                         |  |  |  |
|           |                                                                                                   |                                                                                                                                            |                                                                                     |  |  |                                                                                         |  |  |  |
|           |                                                                                                   |                                                                                                                                            |                                                                                     |  |  |                                                                                         |  |  |  |

Please place an "X" next to the following statement to indicate your agreement:

I certify that I have answered every question and have not altered the wording of any of the questions on this form.
